# Supplementary material for: Characterisation of APOBEC3B-Mediated RNA Editing in Breast Cancer Cells Reveals Regulatory Roles of NEAT1 and MALAT1 lncRNAs
Source: Research Square preprint supplement (doi:10.21203/rs.3.rs-3619470/v1), 2023-11-21
Supplement: Supplementary file 1 [file 3cb2df1bc04fa02f888db449.xlsx]

## Sheet: Sheet1
Location(hg38)	Ref_allele	Alt_allele	RNA-seqStrand	Alt_Dox-treat	Ref-Dox-treat	Alt-DMSO-treat	Ref-DMSO-treat	Pvalue	FDR	Alt_allele_fraction_diff	SampleName
chr1:1052280-1052280	C	T	+	2,8,3,7	31,84,72,67	0,0,1,0	34,76,80,99	1.36485e-06	4.02314e-05	0.067	T24vT0, poly-A enrichment
chr1:1052292-1052292	C	T	+	1,4,4,12	34,102,79,80	0,0,0,0	42,89,91,119	7.17305e-07	2.28354e-05	0.061	T24vT0, poly-A enrichment
chr1:1052292-1052292	C	T	+	2,6,3,8	48,48,40,36	0,0,0,0	42,89,91,119	1.80514e-08	3.19487e-07	0.101	T72vT0, poly-A enrichment
chr1:1052513-1052513	C	T	+	3,9,6,5	77144139143	0,0,0,0	85119159159	1.04848e-05	0.000248165	0.043	T24vT0, poly-A enrichment
chr1:1052513-1052513	C	T	+	1,7,4,6	68,59,70,68	0,0,1,4	87,83,103,67	0.000183893	0.00483082	0.047	T72vT0 ribosomal depletion
chr1:1052513-1052513	C	T	+	9,2,3,7	43,68,75,86	0,0,0,0	85119159159	7.70885e-08	1.28321e-06	0.079	T72vT0, poly-A enrichment
chr1:1052649-1052649	C	T	+	6,1,5,6	37,39,41,50	0,0,1,2	53,43,42,55	9.66609e-06	0.000389483	0.081	T72vT0 ribosomal depletion
chr1:1052649-1052649	C	T	+	2,5,2,7	51,53,44,47	0,0,0,0	42107108122	2.93766e-06	4.19992e-05	0.074	T72vT0, poly-A enrichment
chr1:1052910-1052910	C	T	+	13,10,15,5	134141136124	0,0,0,0	122148171166	4.35096e-13	3.25913e-11	0.073	T24vT0, poly-A enrichment
chr1:1052910-1052910	C	T	+	9,5,7,7	59,79,70,75	0,0,0,3	91,109,92,79	7.93165e-09	5.68736e-07	0.083	T72vT0 ribosomal depletion
chr1:1052910-1052910	C	T	+	7,13,14,10	78,85,81,97	0,0,0,0	122148171166	0	0	0.114	T72vT0, poly-A enrichment
chr1:1053049-1053049	C	T	+	4,10,3,4	54165156165	0,0,0,0	86137171154	0.000143007	0.00250833	0.042	T24vT0, poly-A enrichment
chr1:1053049-1053049	C	T	+	5,6,1,3	96,121,93,90	0,0,0,0	86137171154	0.00568836	0.0427963	0.035	T72vT0, poly-A enrichment
chr1:1104633-1104633	T	C	-	0,2,5,2	5,7,1,2	0,1,0,0	6,10,7,6	4.57978e-05	0.000554862	0.366	T72vT0, poly-A enrichment
chr1:1239343-1239343	T	C	-	4,4,1,1	19,23,21,16	0,0,1,0	14,16,11,17	0.000452455	0.0102476	0.086	T72vT0 ribosomal depletion
chr1:1353406-1353406	G	A	-	3,8,6,0	107,122,109,94	0,0,1,4	184151175143	0.00165457	0.0282228	0.027	T72vT0 ribosomal depletion
chr1:1353406-1353406	G	A	-	8,6,6,7	129110119103	0,1,5,0	188273298246	6.4918e-08	1.093e-06	0.05	T72vT0, poly-A enrichment
chr1:1387027-1387027	G	A	-	6,14,9,9	241481474474	1,0,2,1	242560498501	0.000669433	0.00922571	0.02	T24vT0, poly-A enrichment
chr1:1387027-1387027	G	A	-	10,9,11,9	157144131123	0,0,0,0	259203195227	6.65024e-13	7.38785e-11	0.066	T72vT0 ribosomal depletion
chr1:1387027-1387027	G	A	-	15,17,14,25	242247184281	1,0,2,1	242560498501	0	0	0.066	T72vT0, poly-A enrichment
chr1:1768308-1768308	T	C	-	1,0,4,4	6,14,14,9	0,0,1,0	5,8,5,5	0.000367046	0.00866096	0.127	T72vT0 ribosomal depletion
chr1:1768320-1768320	T	C	-	1,4,5,6	4,9,12,5	0,0,1,2	3,7,5,3	0.00030634	0.00742844	0.195	T72vT0 ribosomal depletion
chr1:1813615-1813615	T	C	-	3,4,0,2	12,13,11,15	0,2,0,0	5,11,9,5	0.00175213	0.0294353	0.1	T72vT0 ribosomal depletion
chr1:1836468-1836468	T	C	-	5,6,1,4	4,7,5,13	0,0,1,1	11,4,4,8	2.15905e-06	0.000102742	0.277	T72vT0 ribosomal depletion
chr1:1871446-1871446	T	C	-	6,3,1,0	14,15,14,14	2,0,0,1	12,15,9,22	0.000568551	0.0121943	0.087	T72vT0 ribosomal depletion
chr1:2066824-2066824	A	G	+	2,3,3,5	7,6,11,8	2,2,0,0	14,12,13,9	5.14395e-05	0.00926148	0.222	T72vT0 ribosomal depletion, mutant A3B
chr1:2392693-2392693	C	T	+	3,4,3,3	31,62,64,60	0,0,0,0	42,70,71,73	0.00062727	0.00879698	0.06	T24vT0, poly-A enrichment
chr1:2392693-2392693	C	T	+	9,9,4,7	37,44,37,45	0,0,0,0	57,47,65,53	1.94955e-12	2.07798e-10	0.149	T72vT0 ribosomal depletion
chr1:2392693-2392693	C	T	+	5,5,5,6	29,26,37,40	0,0,0,0	42,70,71,73	2.06269e-10	4.29801e-09	0.139	T72vT0, poly-A enrichment
chr1:2394477-2394477	C	T	+	3,3,3,2	19,54,32,43	0,0,0,0	21,40,59,58	0.00105002	0.0135333	0.08	T24vT0, poly-A enrichment
chr1:2394477-2394477	C	T	+	5,5,4,2	19,22,17,11	0,0,0,0	34,27,27,25	9.0769e-09	6.40662e-07	0.184	T72vT0 ribosomal depletion
chr1:2394477-2394477	C	T	+	7,9,7,6	26,28,29,23	0,0,0,0	21,40,59,58	2.53131e-14	6.8861e-13	0.214	T72vT0, poly-A enrichment
chr1:6651242-6651242	G	A	-	2,3,3,3	28,33,48,35	0,0,0,0	29,40,38,50	0.000861216	0.0114715	0.072	T24vT0, poly-A enrichment
chr1:6651242-6651242	G	A	-	7,5,5,5	31,24,20,20	0,0,0,0	25,34,29,36	1.1733e-10	1.08238e-08	0.189	T72vT0 ribosomal depletion
chr1:6651242-6651242	G	A	-	6,5,7,5	28,20,32,31	0,0,0,0	29,40,38,50	5.28779e-11	1.15506e-09	0.174	T72vT0, poly-A enrichment
chr1:8443962-8443962	T	C	-	6,2,3,0	23,21,16,17	2,0,0,1	11,15,25,12	0.00230355	0.0362659	0.055	T72vT0 ribosomal depletion
chr1:8742649-8742649	T	C	-	8,1,2,0	7,6,3,3	0,0,0,1	8,4,9,7	7.04608e-06	0.000292505	0.238	T72vT0 ribosomal depletion
chr1:8861233-8861233	G	A	-	22,31,30,31	1331125714131200	3,1,3,6	2275192421031980	6.51142e-09	4.73353e-07	0.02	T72vT0 ribosomal depletion
chr1:8861233-8861233	G	A	-	29,49,33,26	1649172616781490	3,0,1,2	2259309726993030	5.34953e-09	9.94742e-08	0.02	T72vT0, poly-A enrichment
chr1:9101599-9101599	T	C	-	5,5,4,1	36,39,50,42	0,2,1,3	74,68,64,68	0.000944949	0.0180905	0.062	T72vT0 ribosomal depletion
chr1:9101599-9101599	T	C	-	2,4,4,2	33,30,49,31	0,1,1,0	43,71,74,93	0.000236613	0.00254641	0.071	T72vT0, poly-A enrichment
chr1:9176177-9176177	T	C	-	1,3,3,2	7,6,8,18	1,0,0,0	8,10,6,8	0.000148209	0.00405042	0.18	T72vT0 ribosomal depletion
chr1:9820116-9820116	T	C	-	2,0,2,3	4,7,5,5	0,2,0,0	5,5,2,10	0.00233894	0.0366295	0.177	T72vT0 ribosomal depletion
chr1:9948501-9948501	A	G	+	1,2,4,0	7,5,3,6	0,0,0,0	2,7,7,7	0.00195935	0.03198	0.246	T72vT0 ribosomal depletion
chr1:10570917-10570917	A	G	+	4,0,2,2	8,15,6,20	1,0,0,0	7,5,10,16	0.00239112	0.0371842	0.137	T72vT0 ribosomal depletion
chr1:11812007-11812007	A	G	+	0,2,1,4	6,5,7,6	0,0,0,0	6,6,3,14	0.000854394	0.04183	0.203	T72vT0 ribosomal depletion, mutant A3B
chr1:12239831-12239831	C	T	+	3,4,2,2	9,24,15,8	0,0,0,1	14,19,11,19	2.21716e-05	0.00080682	0.165	T72vT0 ribosomal depletion
chr1:12510556-12510556	C	T	+	4,0,7,0	14,19,12,13	0,0,0,3	9,13,18,11	0.000448456	0.0293141	0.094	T72vT0 ribosomal depletion, mutant A3B
chr1:12608104-12608104	T	C	-	1,1,2,4	10,8,9,6	0,0,1,0	11,13,5,10	0.000495791	0.0109693	0.154	T72vT0 ribosomal depletion
chr1:16229493-16229493	T	C	-	6,2,6,4	11,8,13,6	1,7,2,2	20,34,32,23	0.000611953	0.0060442	0.228	T72vT0, poly-A enrichment
chr1:16972687-16972687	C	T	+	3,4,4,3	46,65,64,50	0,0,0,0	52,92,81,101	0.000195114	0.00326919	0.059	T24vT0, poly-A enrichment
chr1:16972687-16972687	C	T	+	10,7,6,9	16,21,11,21	0,0,0,0	62,53,32,34	0	0	0.322	T72vT0 ribosomal depletion
chr1:19339100-19339100	G	A	-	17,13,22,21	129124158109	1,0,2,0	174149168195	0	0	0.119	T24vT0, poly-A enrichment
chr1:19339100-19339100	G	A	-	0,4,3,5	15,16,13,13	0,0,1,1	29,31,38,21	6.18192e-06	0.00026215	0.149	T72vT0 ribosomal depletion
chr1:19339100-19339100	G	A	-	3,8,9,4	40,47,26,40	1,0,2,0	174149168195	1.05271e-12	2.62108e-11	0.136	T72vT0, poly-A enrichment
chr1:19721284-19721284	T	C	-	3,5,0,1	13,14,13,18	0,0,0,1	5,6,7,7	0.00101474	0.0191134	0.095	T72vT0 ribosomal depletion
chr1:19762013-19762013	G	A	-	7,6,6,4	14,5,11,6	0,0,0,3	15,9,19,12	1.26708e-08	8.72846e-07	0.358	T72vT0 ribosomal depletion
chr1:20655484-20655484	G	A	-	14,24,17,18	539666727492	2,1,0,3	719611686555	2.50488e-10	2.20752e-08	0.027	T72vT0 ribosomal depletion
chr1:20655484-20655484	G	A	-	30,18,34,4	719695736615	0,0,0,2	638113111091040	3.5949e-13	9.26476e-12	0.028	T72vT0, poly-A enrichment
chr1:20927182-20927182	T	C	-	2,1,1,2	6,7,4,7	0,0,1,0	4,7,4,7	0.00238335	0.0371293	0.149	T72vT0 ribosomal depletion
chr1:20927996-20927996	T	C	-	2,1,2,5	12,10,14,7	0,2,0,0	8,13,14,7	9.59315e-06	0.00359638	0.161	T72vT0 ribosomal depletion, mutant A3B
chr1:20954473-20954473	T	C	-	1,1,1,1	5,7,4,4	0,1,0,0	10,4,5,8	0.00315496	0.0459764	0.123	T72vT0 ribosomal depletion
chr1:21123489-21123489	T	C	-	2,5,1,1	21,11,4,18	0,0,0,1	13,20,19,11	0.000418499	0.00960265	0.142	T72vT0 ribosomal depletion
chr1:21169385-21169385	T	C	-	5,2,5,1	10,7,16,7	1,0,2,0	10,9,10,10	8.08296e-05	0.00246275	0.165	T72vT0 ribosomal depletion
chr1:21750668-21750668	T	C	-	4,2,2,3	16,10,5,9	0,0,1,3	7,14,13,13	0.00233422	0.0365846	0.161	T72vT0 ribosomal depletion
chr1:23022736-23022736	A	G	+	0,3,2,4	13,6,4,10	1,0,0,0	11,10,10,3	8.06462e-05	0.00246275	0.217	T72vT0 ribosomal depletion
chr1:23970037-23970037	G	A	-	12,11,11,12	99,97,93,91	0,0,0,0	93143147116	2.22045e-16	3.18432e-14	0.108	T72vT0 ribosomal depletion
chr1:23970037-23970037	G	A	-	5,5,3,3	41,40,34,40	0,1,0,0	98155251198	1.8827e-07	3.01437e-06	0.091	T72vT0, poly-A enrichment
chr1:25242518-25242518	G	A	-	2,7,5,3	28,53,49,38	0,0,2,0	63,115,85,84	7.00358e-07	3.67048e-05	0.082	T72vT0 ribosomal depletion
chr1:25242518-25242518	G	A	-	6,4,6,7	75,54,109,92	0,0,1,0	292472451511	9.79261e-09	1.79257e-07	0.066	T72vT0, poly-A enrichment
chr1:25243984-25243984	G	A	-	11,17,14,11	250333357349	1,0,0,0	266358357395	7.343e-11	4.32897e-09	0.039	T24vT0, poly-A enrichment
chr1:25243984-25243984	G	A	-	9,12,7,9	57,68,59,55	0,0,0,0	78,86,83,76	1.37668e-14	1.69665e-12	0.133	T72vT0 ribosomal depletion
chr1:25243984-25243984	G	A	-	13,13,18,15	109106164130	1,0,0,0	266358357395	0	0	0.104	T72vT0, poly-A enrichment
chr1:26429153-26429153	A	G	+	7,8,6,8	32,12,13,7	0,0,1,3	6,8,9,4	0.00066806	0.00653164	0.225	T72vT0, poly-A enrichment
chr1:26939530-26939530	A	G	+	3,2,5,5	7,11,4,12	2,0,1,1	3,6,9,8	0.00325862	0.0471387	0.173	T72vT0 ribosomal depletion
chr1:27479370-27479370	T	C	-	3,2,2,1	7,15,13,9	1,0,0,0	10,14,5,12	0.000978705	0.0185677	0.14	T72vT0 ribosomal depletion
chr1:27666336-27666336	G	A	-	3,3,6,5	83,100,113,76	1,0,0,0	244237197245	0.000302337	0.00733749	0.043	T72vT0 ribosomal depletion
chr1:28069458-28069458	T	C	-	2,4,5,3	3,5,4,6	0,3,1,0	7,4,2,5	0.00176296	0.0295544	0.243	T72vT0 ribosomal depletion
chr1:28371908-28371908	A	G	+	3,4,2,6	6,2,2,6	3,1,1,1	10,5,8,8	0.000314574	0.0242506	0.345	T72vT0 ribosomal depletion, mutant A3B
chr1:28420006-28420006	A	G	+	3,0,2,2	3,7,3,0	0,0,1,0	7,4,6,5	0.000110307	0.0134766	0.439	T72vT0 ribosomal depletion, mutant A3B
chr1:28506777-28506777	C	T	+	8,5,3,7	82,77,63,67	0,0,0,1	70,72,73,67	4.30232e-07	2.38556e-05	0.069	T72vT0 ribosomal depletion
chr1:28576967-28576967	A	G	+	1,2,2,2	3,6,4,3	0,2,0,1	5,5,8,6	0.00338977	0.0485902	0.201	T72vT0 ribosomal depletion
chr1:28576981-28576981	A	G	+	2,3,2,4	3,6,2,5	1,0,3,0	4,7,8,9	0.000514839	0.0112878	0.301	T72vT0 ribosomal depletion
chr1:29170050-29170050	G	A	-	3,4,3,4	25,60,46,57	0,0,0,0	31,45,44,48	8.46069e-05	0.00157512	0.074	T24vT0, poly-A enrichment
chr1:29170050-29170050	G	A	-	2,7,1,2	6,8,6,3	0,0,0,0	7,17,13,14	1.45438e-08	9.93197e-07	0.315	T72vT0 ribosomal depletion
chr1:29170050-29170050	G	A	-	2,1,2,9	4,2,5,12	0,0,0,0	31,45,44,48	4.76774e-12	1.12511e-10	0.345	T72vT0, poly-A enrichment
chr1:31421704-31421704	C	T	+	3,3,3,3	11,50,43,40	0,0,0,0	7,20,40,40	0.000303229	0.00474363	0.101	T24vT0, poly-A enrichment
chr1:31421704-31421704	C	T	+	14,15,11,13	145119109126	0,0,0,0	130137122158	2.22045e-16	3.18432e-14	0.096	T72vT0 ribosomal depletion
chr1:32057200-32057200	A	G	+	2,2,2,3	22,15,17,18	0,0,0,1	10,19,13,12	0.000962018	0.0183394	0.093	T72vT0 ribosomal depletion
chr1:32788382-32788382	T	C	-	5,1,2,3	13,13,17,12	0,0,2,0	10,6,9,11	0.000340264	0.00815136	0.118	T72vT0 ribosomal depletion
chr1:32794085-32794085	T	C	-	2,3,2,3	12,8,16,13	0,1,0,0	6,9,8,8	0.000101454	0.00294199	0.154	T72vT0 ribosomal depletion
chr1:33023306-33023306	T	C	-	2,5,3,4	10,8,5,6	0,1,1,0	7,6,6,9	2.58428e-06	0.000121331	0.26	T72vT0 ribosomal depletion
chr1:33265458-33265458	C	T	+	3,3,1,4	6,5,3,6	0,0,0,1	12,7,7,11	1.47602e-07	8.78647e-06	0.319	T72vT0 ribosomal depletion
chr1:35089064-35089064	A	G	+	0,1,5,4	23,27,27,23	1,0,0,0	18,19,26,33	0.00106295	0.0197641	0.072	T72vT0 ribosomal depletion
chr1:35184109-35184109	G	A	-	8,15,10,14	108124113107	0,0,0,0	80,125,91,117	8.83738e-14	1.02885e-11	0.093	T72vT0 ribosomal depletion
chr1:35271888-35271888	A	G	+	3,1,1,3	2,6,3,4	0,0,0,0	9,7,14,11	1.85395e-05	0.000690579	0.355	T72vT0 ribosomal depletion
chr1:36233979-36233979	A	G	+	1,2,6,3	3,13,11,7	0,0,0,0	1,10,5,14	1.36263e-07	8.15768e-06	0.259	T72vT0 ribosomal depletion
chr1:36799379-36799379	G	A	-	1,3,5,4	51,56,67,63	1,0,0,0	57,65,85,62	0.00131246	0.0165147	0.045	T24vT0, poly-A enrichment
chr1:36799379-36799379	G	A	-	2,5,1,4	18,29,25,29	0,1,0,4	69,47,54,54	0.000618631	0.0130119	0.079	T72vT0 ribosomal depletion
chr1:37456444-37456444	T	C	-	1,4,1,2	13,7,9,8	0,0,0,0	11,9,6,8	0.000566906	0.0121755	0.184	T72vT0 ribosomal depletion
chr1:37499144-37499144	T	C	-	9,8,3,7	0,1,0,0	9,5,7,6	3,0,1,4	0.000407623	0.00942059	0.166	T72vT0 ribosomal depletion
chr1:39049930-39049930	A	G	+	1,3,1,2	3,8,5,6	0,0,0,0	7,10,8,4	0.000726836	0.0148149	0.235	T72vT0 ribosomal depletion
chr1:39753041-39753041	C	T	+	7,4,4,13	178157188161	0,1,0,0	168279227231	1.86774e-06	2.73005e-05	0.039	T72vT0, poly-A enrichment
chr1:43273732-43273732	C	T	+	4,9,8,8	148281318284	0,0,0,0	144253269268	0.000273746	0.00433568	0.027	T24vT0, poly-A enrichment
chr1:43273732-43273732	C	T	+	6,6,11,12	99,87,123,93	0,0,0,0	81,76,105,101	1.65213e-10	1.48927e-08	0.08	T72vT0 ribosomal depletion
chr1:43273732-43273732	C	T	+	16,17,21,20	200216258193	0,0,0,0	144253269268	0	0	0.079	T72vT0, poly-A enrichment
chr1:43551864-43551864	A	G	+	7,1,6,3	19,11,22,10	2,1,1,1	11,13,20,15	0.00224505	0.0356116	0.116	T72vT0 ribosomal depletion
chr1:43594954-43594954	C	T	+	3,3,3,3	23,41,37,43	0,0,0,0	42,91,88,76	9.91982e-05	0.00182016	0.081	T24vT0, poly-A enrichment
chr1:43594954-43594954	C	T	+	6,5,6,4	17,21,15,12	0,0,0,0	31,55,33,35	1.02252e-12	1.11628e-10	0.247	T72vT0 ribosomal depletion
chr1:43594954-43594954	C	T	+	3,6,3,6	13,27,16,24	0,0,0,0	42,91,88,76	2.16696e-11	4.87856e-10	0.182	T72vT0, poly-A enrichment
chr1:45554307-45554307	A	G	+	1,3,1,3	6,3,6,15	1,0,1,0	5,5,12,11	0.00109158	0.020211	0.177	T72vT0 ribosomal depletion
chr1:45937383-45937383	A	G	+	0,3,2,2	7,5,4,10	0,0,1,0	5,4,6,5	0.00303138	0.0446082	0.183	T72vT0 ribosomal depletion
chr1:46034850-46034850	C	T	+	1,8,1,8	123162123107	0,0,0,0	102120208153	0.00214863	0.0188157	0.033	T72vT0, poly-A enrichment
chr1:46085977-46085977	T	C	-	2,3,0,3	7,11,5,11	0,0,0,1	10,9,16,9	0.000456255	0.0103041	0.138	T72vT0 ribosomal depletion
chr1:46087713-46087713	T	C	-	1,5,2,5	8,10,14,5	2,1,1,0	10,9,9,9	0.00194255	0.0317717	0.176	T72vT0 ribosomal depletion
chr1:47297685-47297685	T	C	-	4,1,1,2	15,13,19,7	0,2,0,0	10,25,19,23	0.00116385	0.0496897	0.12	T72vT0 ribosomal depletion, mutant A3B
chr1:50931678-50931678	T	C	-	6,8,1,3	18,23,22,24	0,0,1,0	20,15,19,13	5.84411e-07	3.13331e-05	0.153	T72vT0 ribosomal depletion
chr1:51276458-51276458	T	C	-	2,0,2,3	1,4,3,5	0,0,0,0	5,6,3,6	0.000120783	0.0141259	0.36	T72vT0 ribosomal depletion, mutant A3B
chr1:51328130-51328130	T	C	-	3,3,2,3	6,10,5,8	2,0,0,1	7,5,4,4	0.000934045	0.0179253	0.175	T72vT0 ribosomal depletion
chr1:51330095-51330095	T	C	-	5,5,6,3	41,35,27,48	1,1,0,0	37,31,29,31	3.17746e-06	0.000146135	0.104	T72vT0 ribosomal depletion
chr1:51378406-51378406	T	C	-	2,2,2,3	8,4,1,2	1,2,0,1	11,4,7,5	0.00290732	0.0432261	0.304	T72vT0 ribosomal depletion
chr1:52144198-52144198	A	G	+	4,5,5,0	15,6,8,6	0,0,0,0	7,4,4,7	7.94017e-08	4.87378e-06	0.262	T72vT0 ribosomal depletion
chr1:52305544-52305544	A	G	+	9,3,5,2	9,8,9,12	3,0,1,0	10,7,12,14	5.24216e-05	0.00172102	0.241	T72vT0 ribosomal depletion
chr1:52433171-52433171	T	C	-	0,3,4,1	1,5,5,3	2,0,0,0	6,9,1,7	5.20284e-05	0.00170989	0.205	T72vT0 ribosomal depletion
chr1:52737117-52737117	A	G	+	2,1,2,2	5,8,9,7	0,0,1,0	4,4,3,11	0.00337229	0.0484057	0.138	T72vT0 ribosomal depletion
chr1:52883392-52883392	A	G	+	1,2,1,5	9,4,8,8	0,1,0,1	8,9,9,8	0.000252769	0.00627317	0.179	T72vT0 ribosomal depletion
chr1:53230734-53230734	T	C	-	0,2,7,0	7,3,11,7	0,0,1,1	4,4,6,8	0.00255229	0.02928	0.134	T24vT0, poly-A enrichment
chr1:53230734-53230734	T	C	-	1,0,3,5	5,10,10,8	0,1,0,0	5,11,6,6	0.000128535	0.00359322	0.175	T72vT0 ribosomal depletion
chr1:54216942-54216942	C	T	+	1,3,4,0	8,11,11,26	0,0,0,0	11,13,13,17	0.00268853	0.0407412	0.148	T72vT0 ribosomal depletion
chr1:54718482-54718482	A	G	+	6,6,2,4	2,7,1,2	5,1,3,0	11,6,7,8	0.00012609	0.0145515	0.447	T72vT0 ribosomal depletion, mutant A3B
chr1:58656096-58656096	G	A	-	3,4,4,3	52,93,102,89	0,0,0,0	70,93,108,110	0.00477793	0.0483642	0.042	T24vT0, poly-A enrichment
chr1:58656096-58656096	G	A	-	3,4,2,3	32,37,20,31	1,0,0,0	42,36,40,47	9.54962e-05	0.00280633	0.085	T72vT0 ribosomal depletion
chr1:58656096-58656096	G	A	-	6,7,5,9	51,69,52,69	0,0,0,0	70,93,108,110	4.99341e-11	1.09482e-09	0.1	T72vT0, poly-A enrichment
chr1:61103050-61103050	C	T	+	5,8,6,7	11,18,18,19	0,0,0,0	25,32,31,34	2.87548e-14	3.50275e-12	0.285	T72vT0 ribosomal depletion
chr1:61118358-61118358	C	T	+	10,11,6,11	25,25,23,22	0,0,0,0	23,31,42,35	1.11022e-16	1.61417e-14	0.283	T72vT0 ribosomal depletion
chr1:61721853-61721853	T	C	-	6,2,6,3	40,21,23,21	3,0,0,0	32,20,16,15	9.9251e-06	0.00367054	0.116	T72vT0 ribosomal depletion, mutant A3B
chr1:61820159-61820159	A	G	+	1,4,2,5	11,12,16,11	0,0,0,1	6,11,11,11	7.66982e-06	0.000313856	0.168	T72vT0 ribosomal depletion
chr1:61851325-61851325	C	T	+	6,8,4,5	27,29,16,26	0,0,0,0	22,20,27,26	3.96055e-10	3.39553e-08	0.19	T72vT0 ribosomal depletion
chr1:61918734-61918734	A	G	+	8,2,8,5	16,9,9,18	3,1,1,1	7,14,6,16	0.00342023	0.0488937	0.159	T72vT0 ribosomal depletion
chr1:62111684-62111684	A	G	+	1,1,3,2	4,5,4,5	0,0,1,1	12,7,7,6	0.000833634	0.0164588	0.203	T72vT0 ribosomal depletion
chr1:62450824-62450824	C	T	+	4,9,6,7	50,73,75,100	0,0,0,0	141239183187	5.55815e-11	1.20962e-09	0.081	T72vT0, poly-A enrichment
chr1:77708931-77708931	T	C	-	3,2,3,1	16,10,8,12	1,0,0,1	6,15,13,7	0.000793121	0.0158474	0.102	T72vT0 ribosomal depletion
chr1:77708945-77708945	T	C	-	3,2,4,1	15,11,8,14	0,0,1,1	9,17,13,8	0.000277447	0.00679089	0.134	T72vT0 ribosomal depletion
chr1:77962826-77962826	G	A	-	6,7,6,5	129142141106	0,0,0,0	251254252248	1.96626e-06	9.50009e-05	0.044	T72vT0 ribosomal depletion
chr1:77962826-77962826	G	A	-	3,3,22,4	110,88,363,133	0,0,0,1	329322392338	2.63698e-08	4.61157e-07	0.036	T72vT0, poly-A enrichment
chr1:85256124-85256124	T	C	-	1,2,2,2	1,7,8,3	0,0,0,0	8,8,5,3	0.000752428	0.0151756	0.331	T72vT0 ribosomal depletion
chr1:86900805-86900805	T	C	-	8,2,5,3	7,6,6,6	1,0,1,1	2,7,5,7	2.70766e-05	0.000964918	0.237	T72vT0 ribosomal depletion
chr1:94439889-94439889	A	G	+	4,1,2,2	4,6,3,8	0,2,0,2	3,12,6,7	0.00283746	0.0424843	0.219	T72vT0 ribosomal depletion
chr1:100284850-100284850	A	G	+	3,0,2,4	19,12,12,17	0,1,0,0	12,6,15,12	0.000760376	0.0152926	0.082	T72vT0 ribosomal depletion
chr1:109094769-109094769	C	T	+	4,7,6,2	122153177145	1,0,0,0	139220170193	0.00317572	0.0348617	0.029	T24vT0, poly-A enrichment
chr1:109094769-109094769	C	T	+	7,2,4,5	74,85,91,68	0,0,0,3	100,100,86,86	0.000107264	0.00308495	0.047	T72vT0 ribosomal depletion
chr1:109171270-109171270	A	G	+	1,2,3,1	7,1,6,8	0,0,0,0	5,4,6,5	0.00175174	0.0294353	0.309	T72vT0 ribosomal depletion
chr1:109381622-109381622	T	C	-	1,2,7,4	11,7,12,11	0,2,1,1	9,11,12,13	0.000597422	0.0126586	0.16	T72vT0 ribosomal depletion
chr1:109731805-109731805	C	T	+	12,1,5,7	68,43,46,52	0,0,0,4	103,87,120,61	1.03457e-08	7.23741e-07	0.082	T72vT0 ribosomal depletion
chr1:111193217-111193217	G	A	-	3,3,3,3	29,29,16,34	0,0,0,0	11,18,27,31	5.04404e-05	0.000994285	0.107	T24vT0, poly-A enrichment
chr1:111193217-111193217	G	A	-	4,2,6,7	27,26,30,32	0,0,0,0	41,35,35,40	6.65755e-09	4.82864e-07	0.137	T72vT0 ribosomal depletion
chr1:111193217-111193217	G	A	-	2,3,2,3	11,17,14,18	0,0,0,0	11,18,27,31	3.67249e-05	0.000450512	0.143	T72vT0, poly-A enrichment
chr1:114500431-114500431	T	C	-	2,5,1,1	9,13,4,10	0,0,0,1	8,11,10,7	9.55308e-05	0.00280633	0.156	T72vT0 ribosomal depletion
chr1:117049575-117049575	G	A	-	4,1,4,0	4,2,2,8	0,0,0,0	8,10,11,9	7.52269e-06	0.000308252	0.375	T72vT0 ribosomal depletion
chr1:117082988-117082988	A	G	+	5,3,2,0	7,6,11,11	2,0,0,0	11,8,11,12	5.52529e-06	0.00252018	0.188	T72vT0 ribosomal depletion, mutant A3B
chr1:117101851-117101851	C	T	+	3,3,3,3	37,41,52,29	0,0,0,0	43,58,56,53	0.000326699	0.00500022	0.073	T24vT0, poly-A enrichment
chr1:117101851-117101851	C	T	+	3,4,4,4	18,14,15,19	0,0,0,0	18,19,24,22	6.35397e-08	3.96182e-06	0.187	T72vT0 ribosomal depletion
chr1:117101851-117101851	C	T	+	4,5,2,4	20,21,13,25	0,0,0,0	43,58,56,53	1.24142e-08	2.25141e-07	0.158	T72vT0, poly-A enrichment
chr1:119150872-119150872	A	G	+	1,1,1,5	5,4,10,7	0,0,2,0	8,4,8,2	0.000350345	0.0252996	0.169	T72vT0 ribosomal depletion, mutant A3B
chr1:147179524-147179524	A	G	+	5,2,6,4	5,2,5,6	4,6,6,6	53,62,37,45	1.9135e-06	2.79001e-05	0.382	T72vT0, poly-A enrichment
chr1:149900377-149900377	C	T	+	7,5,5,4	125152122161	0,0,0,0	140135130169	0.000202693	0.00338726	0.037	T24vT0, poly-A enrichment
chr1:149900377-149900377	C	T	+	13,13,15,9	79,69,64,76	0,0,0,0	131109109109	0	0	0.149	T72vT0 ribosomal depletion
chr1:149900377-149900377	C	T	+	16,14,16,13	102,112,97,89	0,0,0,0	140135130169	0	0	0.129	T72vT0, poly-A enrichment
chr1:150341869-150341869	A	G	+	2,1,5,3	4,12,12,7	1,1,0,0	2,11,11,17	6.32467e-05	0.00121659	0.147	T24vT0, poly-A enrichment
chr1:150604679-150604679	G	A	-	2,3,3,3	4,8,16,17	0,0,0,0	26,27,30,32	1.10101e-06	3.30666e-05	0.228	T24vT0, poly-A enrichment
chr1:150604679-150604679	G	A	-	13,5,11,11	36,23,26,30	0,0,0,0	84,84,85,36	0	0	0.252	T72vT0 ribosomal depletion
chr1:150604679-150604679	G	A	-	2,2,3,5	11,6,10,17	0,0,0,0	26,27,30,32	1.02494e-07	1.69173e-06	0.215	T72vT0, poly-A enrichment
chr1:150620239-150620239	G	A	-	2,3,3,2	10,50,49,28	0,0,0,0	31,38,45,46	0.00409697	0.0430735	0.087	T24vT0, poly-A enrichment
chr1:150620239-150620239	G	A	-	14,12,8,11	112113102104	0,0,0,0	102,138,118,90	4.42979e-14	5.27396e-12	0.094	T72vT0 ribosomal depletion
chr1:150620533-150620533	G	A	-	3,3,3,3	18,47,59,32	0,0,0,0	25,46,55,43	0.000313638	0.00483519	0.084	T24vT0, poly-A enrichment
chr1:150620533-150620533	G	A	-	6,8,10,8	74,78,82,95	0,0,0,0	82,98,98,83	7.35786e-11	6.95031e-09	0.089	T72vT0 ribosomal depletion
chr1:150674698-150674698	T	C	-	0,3,1,4	9,5,8,18	1,0,1,0	8,12,11,10	0.00284051	0.0424931	0.118	T72vT0 ribosomal depletion
chr1:150683673-150683673	T	C	-	2,1,2,2	4,9,8,4	0,1,1,0	8,4,11,6	0.00233941	0.0366295	0.171	T72vT0 ribosomal depletion
chr1:150854486-150854486	T	C	-	4,2,1,2	8,15,17,19	0,1,0,0	8,6,15,14	0.000725281	0.0148108	0.115	T72vT0 ribosomal depletion
chr1:150869832-150869832	T	C	-	2,2,6,4	7,1,2,1	1,2,0,1	3,7,3,14	2.01868e-05	0.000744033	0.475	T72vT0 ribosomal depletion
chr1:150966086-150966086	G	A	-	22,26,27,31	1291159516481700	2,0,0,2	1362180616441650	0.000190715	0.00321238	0.016	T24vT0, poly-A enrichment
chr1:150966086-150966086	G	A	-	30,30,25,28	771793747680	0,1,0,8	1001859992813	0	0	0.034	T72vT0 ribosomal depletion
chr1:150966086-150966086	G	A	-	33,27,34,39	1159107711341270	2,0,0,2	1362180616441650	2.22045e-16	6.49121e-15	0.027	T72vT0, poly-A enrichment
chr1:151181701-151181701	T	C	-	7,4,7,5	23,18,18,31	0,2,0,3	19,19,15,19	0.00021842	0.0055889	0.151	T72vT0 ribosomal depletion
chr1:151215966-151215966	C	T	+	0,3,3,3	1,9,14,3	0,0,0,0	4,11,9,11	3.33987e-05	0.000694934	0.232	T24vT0, poly-A enrichment
chr1:151215966-151215966	C	T	+	7,10,10,12	42,48,44,45	0,0,0,0	82,82,70,70	0	0	0.178	T72vT0 ribosomal depletion
chr1:151403477-151403477	G	A	-	4,11,4,6	14,29,22,29	0,0,0,0	43,38,34,34	2.09532e-12	2.21837e-10	0.206	T72vT0 ribosomal depletion
chr1:151543729-151543729	C	T	+	7,4,6,5	62,51,61,64	0,0,0,0	79,79,88,72	2.37652e-08	1.56533e-06	0.084	T72vT0 ribosomal depletion
chr1:151570346-151570346	A	G	+	2,4,1,1	9,10,5,12	0,0,1,0	9,6,11,7	0.000153176	0.0161229	0.157	T72vT0 ribosomal depletion, mutant A3B
chr1:153859334-153859334	T	C	-	3,4,1,3	54,29,30,42	0,0,0,0	12,13,22,33	0.00144814	0.0253123	0.068	T72vT0 ribosomal depletion
chr1:153876758-153876758	T	C	-	3,3,2,3	23,28,31,30	0,0,0,2	23,11,13,36	0.001121	0.0205999	0.078	T72vT0 ribosomal depletion
chr1:153876973-153876973	T	C	-	5,6,4,2	37,33,34,42	1,1,1,1	43,43,26,35	4.29737e-05	0.0085745	0.078	T72vT0 ribosomal depletion, mutant A3B
chr1:153899249-153899249	T	C	-	5,2,5,2	28,39,21,50	1,0,0,1	24,16,34,30	0.000160192	0.0043045	0.09	T72vT0 ribosomal depletion
chr1:153899251-153899251	T	C	-	8,4,7,4	25,37,18,46	1,0,0,4	23,16,33,24	0.000271674	0.00667549	0.129	T72vT0 ribosomal depletion
chr1:153903977-153903977	T	C	-	19,25,16,21	60,51,47,48	2,2,1,14	55,40,40,61	4.22555e-08	2.69325e-06	0.209	T72vT0 ribosomal depletion
chr1:153903983-153903983	T	C	-	6,5,5,4	77,72,55,69	0,0,0,2	62,45,44,81	1.68292e-05	0.000635881	0.063	T72vT0 ribosomal depletion
chr1:153961620-153961620	G	A	-	1,1,4,2	8,8,15,7	0,0,0,0	5,10,18,13	0.000477782	0.00696119	0.164	T24vT0, poly-A enrichment
chr1:153961620-153961620	G	A	-	2,2,2,3	6,5,9,8	0,0,0,0	6,12,8,16	6.9407e-06	0.00028851	0.248	T72vT0 ribosomal depletion
chr1:154208818-154208818	T	C	-	3,3,5,3	1,13,17,10	0,0,1,4	5,18,21,11	0.00252243	0.0290948	0.271	T24vT0, poly-A enrichment
chr1:154208818-154208818	T	C	-	2,6,5,6	8,7,9,8	0,0,1,4	5,18,21,11	2.46608e-05	0.000312973	0.284	T72vT0, poly-A enrichment
chr1:154261755-154261755	C	T	+	3,3,3,2	9,31,20,12	0,0,2,0	7,26,33,24	0.00013851	0.00243617	0.139	T24vT0, poly-A enrichment
chr1:154261755-154261755	C	T	+	15,8,9,11	29,25,29,20	0,0,0,0	45,44,35,51	0	0	0.294	T72vT0 ribosomal depletion
chr1:154261755-154261755	C	T	+	6,8,5,6	16,21,15,15	0,0,2,0	7,26,33,24	1.86175e-10	3.90701e-09	0.257	T72vT0, poly-A enrichment
chr1:154590892-154590892	T	C	-	4,2,2,1	12,18,6,7	0,0,0,1	3,12,12,7	0.0001991	0.0051914	0.15	T72vT0 ribosomal depletion
chr1:154924428-154924428	T	C	-	2,3,2,3	5,6,3,9	0,0,0,0	7,8,9,10	4.39624e-07	2.42485e-05	0.317	T72vT0 ribosomal depletion
chr1:154987895-154987895	A	G	+	3,4,1,1	10,18,17,10	0,0,0,0	17,14,6,21	8.06761e-05	0.0115498	0.14	T72vT0 ribosomal depletion, mutant A3B
chr1:155017357-155017357	A	G	+	3,6,10,9	214188236210	2,1,1,0	183182145164	0.000222868	0.00567055	0.026	T72vT0 ribosomal depletion
chr1:155018314-155018314	C	T	+	5,5,5,4	39,38,35,27	0,0,0,0	49,44,33,50	2.80809e-08	4.88176e-07	0.121	T72vT0, poly-A enrichment
chr1:155225540-155225540	T	C	-	3,10,4,2	12,8,8,12	1,0,3,1	4,9,11,12	0.00324125	0.0268511	0.185	T72vT0, poly-A enrichment
chr1:155359252-155359252	T	C	-	4,5,4,3	4,2,3,3	1,4,3,1	8,12,11,7	0.000281333	0.00687534	0.396	T72vT0 ribosomal depletion
chr1:155421163-155421163	T	C	-	3,2,3,0	4,6,5,4	0,0,1,1	9,5,4,5	0.000403766	0.00935989	0.172	T72vT0 ribosomal depletion
chr1:155478871-155478871	G	A	-	10,16,13,13	133190176151	0,0,0,0	185203185159	3.44169e-15	4.46853e-13	0.074	T72vT0 ribosomal depletion
chr1:155543937-155543937	T	C	-	10,23,16,17	100,109,94,76	1,6,2,4	60,66,77,79	4.3288e-07	2.39603e-05	0.105	T72vT0 ribosomal depletion
chr1:155552486-155552486	T	C	-	3,1,3,2	13,13,13,17	0,0,0,1	7,13,6,13	0.000479572	0.0107005	0.12	T72vT0 ribosomal depletion
chr1:155559282-155559282	T	C	-	3,4,3,1	17,13,12,12	0,0,1,0	5,7,7,11	6.11498e-05	0.00196664	0.134	T72vT0 ribosomal depletion
chr1:155813356-155813356	T	C	-	2,2,4,3	4,7,4,3	0,1,0,1	4,9,15,8	7.93915e-07	4.11297e-05	0.336	T72vT0 ribosomal depletion
chr1:155964320-155964320	T	C	-	0,3,1,5	7,5,6,4	0,1,2,0	3,7,5,2	0.00124795	0.0224988	0.166	T72vT0 ribosomal depletion
chr1:155991271-155991271	T	C	-	1,1,5,6	2,9,8,9	2,0,0,1	3,4,5,8	0.000686465	0.00939055	0.177	T24vT0, poly-A enrichment
chr1:155991567-155991567	T	C	-	6,1,1,5	22,20,24,28	1,0,0,1	2,4,9,9	0.00170361	0.0288241	0.005	T72vT0 ribosomal depletion
chr1:155991567-155991567	T	C	-	4,3,3,2	14,11,8,19	0,2,1,0	7,16,6,7	0.000867599	0.00827599	0.138	T72vT0, poly-A enrichment
chr1:155994515-155994515	T	C	-	4,2,1,3	17,11,16,15	0,0,0,2	4,6,5,6	0.00184867	0.0305862	0.08	T72vT0 ribosomal depletion
chr1:156075913-156075913	T	C	-	2,6,1,3	27,34,30,34	0,1,0,0	28,14,19,17	0.000356905	0.0036922	0.066	T72vT0, poly-A enrichment
chr1:156089001-156089001	A	G	+	4,3,3,5	8,5,7,11	0,1,1,2	12,6,9,15	6.91208e-05	0.0021656	0.24	T72vT0 ribosomal depletion
chr1:156182536-156182536	A	G	+	1,2,2,6	24,13,14,17	0,0,0,1	8,2,4,8	5.16032e-05	0.00169946	0.112	T72vT0 ribosomal depletion
chr1:156250079-156250079	G	A	-	4,11,12,16	138471464487	0,0,0,0	224588518594	5.00402e-06	0.000127954	0.027	T24vT0, poly-A enrichment
chr1:156250079-156250079	G	A	-	22,19,27,16	211209229182	0,0,0,0	314290299295	0	0	0.091	T72vT0 ribosomal depletion
chr1:156303398-156303398	T	C	-	1,4,3,0	10,7,9,11	0,0,0,2	8,6,7,11	0.00239571	0.0372154	0.138	T72vT0 ribosomal depletion
chr1:161135850-161135850	A	G	+	4,1,3,1	11,13,18,17	0,0,0,0	9,12,15,15	0.000428405	0.00629944	0.134	T24vT0, poly-A enrichment
chr1:164564482-164564482	C	T	+	7,11,8,5	19,23,24,20	0,0,0,0	24,42,34,31	7.43849e-15	9.34998e-13	0.261	T72vT0 ribosomal depletion
chr1:164565100-164565100	C	T	+	7,10,7,7	38,48,56,43	0,0,0,0	42,68,52,58	2.18037e-12	2.30069e-10	0.145	T72vT0 ribosomal depletion
chr1:164574392-164574392	C	T	+	12,16,13,24	196194181214	0,0,0,0	224239300263	0	0	0.075	T72vT0 ribosomal depletion
chr1:164579449-164579449	C	T	+	2,9,4,4	100116131138	0,1,0,1	122140123114	0.000534448	0.0116128	0.033	T72vT0 ribosomal depletion
chr1:164583588-164583588	C	T	+	9,13,7,7	27,25,18,20	0,0,0,0	32,32,27,39	2.22045e-16	3.18432e-14	0.283	T72vT0 ribosomal depletion
chr1:164606647-164606647	C	T	+	13,21,8,13	37,43,26,38	0,0,0,0	43,39,59,62	0	0	0.27	T72vT0 ribosomal depletion
chr1:164611286-164611286	A	G	+	8,7,8,6	117162135104	2,6,3,1	116147153112	0.00301857	0.0444612	0.033	T72vT0 ribosomal depletion
chr1:164651401-164651401	C	T	+	17,14,9,13	201146168177	0,0,0,0	225213220197	8.88178e-16	1.21835e-13	0.071	T72vT0 ribosomal depletion
chr1:164666401-164666401	C	T	+	14,12,14,18	28,30,31,37	0,0,0,0	49,58,61,53	0	0	0.314	T72vT0 ribosomal depletion
chr1:164681641-164681641	C	T	+	9,15,10,11	88,99,98,95	0,0,0,0	92129126104	2.66454e-15	3.50275e-13	0.105	T72vT0 ribosomal depletion
chr1:164702515-164702515	C	T	+	6,2,4,7	118121123100	0,0,0,5	136139162139	0.000750305	0.0151611	0.032	T72vT0 ribosomal depletion
chr1:166870822-166870822	T	C	-	7,4,5,2	14,8,12,4	0,0,2,3	13,8,19,12	9.6122e-05	0.0028167	0.25	T72vT0 ribosomal depletion
chr1:167541615-167541615	G	A	-	3,6,4,5	50,92,75,54	0,0,0,0	127148143119	2.76442e-06	0.00012902	0.063	T72vT0 ribosomal depletion
chr1:167541615-167541615	G	A	-	8,9,8,9	113111134141	0,0,0,0	722766986916	3.65485e-13	9.37813e-12	0.064	T72vT0, poly-A enrichment
chr1:169114914-169114914	A	G	+	3,3,1,3	19,11,6,5	0,0,1,0	6,4,6,3	2.1931e-06	0.00142901	0.181	T72vT0 ribosomal depletion, mutant A3B
chr1:173488029-173488029	C	T	+	6,14,7,8	250379386343	0,0,0,0	358524512582	0.00017221	0.00293958	0.025	T24vT0, poly-A enrichment
chr1:173488029-173488029	C	T	+	5,3,3,3	66,83,73,52	0,0,1,1	142166129132	0.000967691	0.0184031	0.046	T72vT0 ribosomal depletion
chr1:173488029-173488029	C	T	+	12,2,5,4	77,79,111,98	0,0,0,0	358524512582	5.67658e-08	9.61255e-07	0.06	T72vT0, poly-A enrichment
chr1:173800782-173800782	T	C	-	3,2,3,1	3,1,1,6	0,0,0,0	7,5,6,2	1.72319e-07	1.01431e-05	0.515	T72vT0 ribosomal depletion
chr1:173864451-173864451	G	A	-	15,14,22,7	155269259221	0,0,0,0	194282338344	3.33067e-16	3.11858e-14	0.062	T24vT0, poly-A enrichment
chr1:173864451-173864451	G	A	-	14,8,12,7	14,34,31,20	0,0,0,0	41,48,40,40	1.11022e-16	1.61417e-14	0.307	T72vT0 ribosomal depletion
chr1:173864451-173864451	G	A	-	9,8,18,15	32,27,62,48	0,0,0,0	194282338344	0	0	0.228	T72vT0, poly-A enrichment
chr1:175967285-175967285	T	C	-	0,2,1,4	5,3,7,4	0,0,0,2	7,8,6,10	0.00234349	0.0366569	0.215	T72vT0 ribosomal depletion
chr1:176012180-176012180	T	C	-	0,2,4,3	9,5,10,10	1,0,0,0	11,12,12,12	8.27687e-05	0.0025013	0.18	T72vT0 ribosomal depletion
chr1:179849712-179849712	T	C	-	5,1,1,2	13,14,14,8	1,1,0,0	8,14,4,14	0.00106449	0.0197789	0.108	T72vT0 ribosomal depletion
chr1:183136518-183136518	C	T	+	8,10,9,8	181207181244	0,0,0,2	192231242232	1.10545e-07	4.02195e-06	0.04	T24vT0, poly-A enrichment
chr1:183136518-183136518	C	T	+	5,5,13,7	56,61,51,48	0,0,0,0	114,116,139,88	9.82547e-14	1.13968e-11	0.122	T72vT0 ribosomal depletion
chr1:183136518-183136518	C	T	+	18,16,8,10	101,103,100,86	0,0,0,2	192231242232	0	0	0.114	T72vT0, poly-A enrichment
chr1:184693729-184693729	G	A	-	6,8,8,12	118163167176	0,0,0,0	119182187197	4.61257e-09	2.15943e-07	0.051	T24vT0, poly-A enrichment
chr1:184693729-184693729	G	A	-	7,9,7,11	50,47,45,72	0,0,0,0	83,80,86,102	9.88098e-15	1.22253e-12	0.138	T72vT0 ribosomal depletion
chr1:184693729-184693729	G	A	-	14,16,15,16	93,99,80,123	0,0,0,0	119182187197	0	0	0.136	T72vT0, poly-A enrichment
chr1:193059747-193059747	C	T	+	7,8,7,6	128,132,118,99	1,0,0,1	196161180118	5.93452e-08	3.72235e-06	0.052	T72vT0 ribosomal depletion
chr1:193059747-193059747	C	T	+	4,3,6,2	64,52,38,40	0,0,0,0	59,71,70,71	1.72897e-05	0.000223284	0.074	T72vT0, poly-A enrichment
chr1:193069441-193069441	C	T	+	3,4,2,3	31,54,41,54	0,0,0,0	37,78,58,67	0.000758972	0.0102968	0.064	T24vT0, poly-A enrichment
chr1:193069441-193069441	C	T	+	19,20,24,18	31,32,28,27	1,0,0,0	97,79,101,83	0	0	0.404	T72vT0 ribosomal depletion
chr1:193069441-193069441	C	T	+	8,10,7,6	23,22,21,18	0,0,0,0	37,78,58,67	0	0	0.268	T72vT0, poly-A enrichment
chr1:202005745-202005745	C	T	+	14,10,11,7	472420398369	0,0,0,2	472396424441	3.57715e-05	0.00122673	0.023	T72vT0 ribosomal depletion
chr1:202005745-202005745	C	T	+	17,17,21,13	656575673616	0,2,1,0	556962801897	7.79259e-09	1.43991e-07	0.025	T72vT0, poly-A enrichment
chr1:202941401-202941401	G	A	-	11,9,8,8	294318241275	1,0,1,0	325392340274	3.08882e-06	0.000142683	0.029	T72vT0 ribosomal depletion
chr1:202941401-202941401	G	A	-	9,12,12,8	394449436371	0,0,1,0	831630628561	6.57756e-05	0.000774544	0.024	T72vT0, poly-A enrichment
chr1:203820595-203820595	A	G	+	2,1,6,0	18,20,21,10	0,0,0,0	10,22,16,25	0.00112142	0.0205999	0.092	T72vT0 ribosomal depletion
chr1:203854008-203854008	C	T	+	4,19,9,5	16,52,31,23	0,0,0,0	43,51,50,47	1.11022e-16	1.61417e-14	0.218	T72vT0 ribosomal depletion
chr1:203854008-203854008	C	T	+	6,6,4,7	23,31,18,34	0,0,0,0	35,55,92,70	1.09646e-12	2.70705e-11	0.18	T72vT0, poly-A enrichment
chr1:203868701-203868701	A	G	+	3,3,2,2	9,18,13,11	1,0,0,1	7,8,14,12	0.00036563	0.00863445	0.12	T72vT0 ribosomal depletion
chr1:204136118-204136118	A	G	+	3,5,1,4	17,18,28,21	0,1,0,0	17,32,39,34	4.05646e-06	0.000181791	0.133	T72vT0 ribosomal depletion
chr1:204221472-204221472	G	A	-	9,10,8,9	261249231204	1,1,0,3	251191247244	2.23512e-06	0.000106042	0.032	T72vT0 ribosomal depletion
chr1:204225600-204225600	G	A	-	3,3,3,4	16,43,29,51	0,0,0,0	17,36,48,49	4.05024e-05	0.000823893	0.097	T24vT0, poly-A enrichment
chr1:204234274-204234274	T	C	-	8,6,3,4	24,31,26,27	1,0,2,2	25,36,46,28	1.78573e-05	0.000668325	0.124	T72vT0 ribosomal depletion
chr1:204403778-204403778	G	A	-	2,7,4,4	10,34,20,19	0,0,0,0	20,31,26,25	2.00943e-08	1.34602e-06	0.169	T72vT0 ribosomal depletion
chr1:204403778-204403778	G	A	-	5,7,5,6	33,43,43,42	0,0,0,0	97155198163	8.91176e-13	2.22832e-11	0.125	T72vT0, poly-A enrichment
chr1:204411008-204411008	G	A	-	11,4,6,9	337312290286	0,0,0,3	322263282232	0.00148247	0.0258123	0.021	T72vT0 ribosomal depletion
chr1:204517971-204517971	A	G	+	3,2,3,0	15,14,16,13	0,0,1,0	23,22,14,18	0.00105742	0.0472847	0.096	T72vT0 ribosomal depletion, mutant A3B
chr1:209431106-209431106	C	T	+	13,13,16,19	75,63,79,68	0,1,0,0	117123114120	0	0	0.174	T72vT0 ribosomal depletion
chr1:214326511-214326511	C	T	+	3,6,7,8	25,50,52,44	0,0,0,0	21,52,72,76	4.58208e-10	2.58178e-08	0.122	T24vT0, poly-A enrichment
chr1:214326511-214326511	C	T	+	7,8,6,9	25,18,19,17	0,0,0,0	32,39,46,46	4.44089e-16	6.22712e-14	0.278	T72vT0 ribosomal depletion
chr1:214326511-214326511	C	T	+	4,5,6,2	14,10,15,9	0,0,0,0	21,52,72,76	2.19202e-12	5.27883e-11	0.256	T72vT0, poly-A enrichment
chr1:214663675-214663675	C	T	+	8,5,7,4	124119124107	0,0,0,0	300267273236	5.30324e-07	2.86012e-05	0.048	T72vT0 ribosomal depletion
chr1:214663675-214663675	C	T	+	5,4,11,7	128132265142	1,0,0,0	304426411386	2.70331e-06	3.89329e-05	0.038	T72vT0, poly-A enrichment
chr1:215187001-215187001	A	G	+	2,1,2,2	4,4,3,4	0,1,0,2	6,5,6,6	0.0028385	0.0424843	0.212	T72vT0 ribosomal depletion
chr1:215478212-215478212	T	C	-	3,3,3,1	21,29,35,26	0,1,0,0	13,13,10,11	0.0017731	0.0296928	0.066	T72vT0 ribosomal depletion
chr1:215599919-215599919	C	T	+	11,11,10,11	22,16,13,21	0,0,0,0	28,34,24,41	0	0	0.38	T72vT0 ribosomal depletion
chr1:220100626-220100626	C	T	+	3,2,7,3	37,34,247,47	0,0,0,0	461718592654	0.00284064	0.0239822	0.055	T72vT0, poly-A enrichment
chr1:220121829-220121829	A	G	+	0,1,6,3	5,8,13,3	1,0,1,0	10,4,7,6	0.000102098	0.00295338	0.178	T72vT0 ribosomal depletion
chr1:223736052-223736052	A	G	+	1,2,2,4	6,4,5,5	1,1,1,0	7,1,2,10	0.00214407	0.0343552	0.062	T72vT0 ribosomal depletion
chr1:223767015-223767015	C	T	+	2,1,2,4	7,9,10,9	0,0,0,0	13,24,13,7	3.32615e-05	0.00115319	0.199	T72vT0 ribosomal depletion
chr1:224185134-224185134	A	G	+	1,2,4,1	12,13,14,10	1,0,0,0	6,8,7,5	0.0018105	0.0301749	0.095	T72vT0 ribosomal depletion
chr1:224191442-224191442	A	G	+	1,4,0,3	11,8,15,12	0,0,1,1	8,19,26,23	0.00231424	0.0200567	0.134	T72vT0, poly-A enrichment
chr1:224249211-224249211	T	C	-	1,3,4,0	14,8,17,13	1,0,0,0	13,12,10,16	0.000827953	0.0410482	0.115	T72vT0 ribosomal depletion, mutant A3B
chr1:224296109-224296109	T	C	-	2,2,1,2	2,7,4,11	0,0,0,2	6,6,4,7	0.00264744	0.0403054	0.213	T72vT0 ribosomal depletion
chr1:224302847-224302847	T	C	-	3,0,4,4	6,8,15,8	0,1,0,0	10,12,7,5	6.79303e-06	0.000282744	0.2	T72vT0 ribosomal depletion
chr1:224316401-224316401	T	C	-	4,5,1,3	11,12,18,10	0,3,2,0	22,19,20,21	0.000958262	0.018301	0.154	T72vT0 ribosomal depletion
chr1:224385980-224385980	G	A	-	18,26,21,25	102165158140	0,0,0,0	137164198181	0	0	0.139	T24vT0, poly-A enrichment
chr1:224385980-224385980	G	A	-	6,8,17,9	38,58,40,38	0,0,0,1	42,74,73,56	5.66214e-15	7.23241e-13	0.182	T72vT0 ribosomal depletion
chr1:224385980-224385980	G	A	-	4,0,13,7	38,28,36,34	0,0,0,0	137164198181	4.41869e-13	1.11915e-11	0.133	T72vT0, poly-A enrichment
chr1:224388475-224388475	G	A	-	13,13,18,28	313387389373	0,0,0,0	350422443546	1.11022e-16	1.08751e-14	0.047	T24vT0, poly-A enrichment
chr1:224388475-224388475	G	A	-	12,16,23,17	44,87,73,55	0,0,0,0	80,141,77,99	0	0	0.211	T72vT0 ribosomal depletion
chr1:224388475-224388475	G	A	-	18,19,22,29	96,99,115,143	0,0,0,0	350422443546	0	0	0.162	T72vT0, poly-A enrichment
chr1:224425338-224425338	G	A	-	5,14,7,7	26,62,36,37	0,0,0,0	44,68,67,45	3.86358e-14	4.61727e-12	0.167	T72vT0 ribosomal depletion
chr1:224469180-224469180	A	G	+	2,4,1,3	12,11,6,9	0,0,1,0	8,11,11,11	2.30168e-05	0.000833732	0.18	T72vT0 ribosomal depletion
chr1:224947192-224947192	A	G	+	1,1,6,2	24,24,23,20	0,0,0,0	17,25,15,14	0.000552	0.0119361	0.094	T72vT0 ribosomal depletion
chr1:225419444-225419444	G	A	-	1,0,21,0	2,1,76,2	0,0,0,0	174214203228	4.07013e-07	6.32701e-06	0.137	T72vT0, poly-A enrichment
chr1:225495198-225495198	G	A	-	17,9,18,19	167100177147	0,0,0,0	242376390381	0	0	0.095	T72vT0, poly-A enrichment
chr1:225560630-225560630	T	C	-	2,2,3,3	6,5,1,1	2,0,1,1	9,8,4,4	0.000643946	0.0134635	0.363	T72vT0 ribosomal depletion
chr1:225622403-225622403	T	C	-	4,7,4,4	33,35,24,22	3,1,1,1	29,28,26,24	0.00263894	0.0402604	0.092	T72vT0 ribosomal depletion
chr1:225636641-225636641	T	C	-	3,2,2,0	5,3,7,10	0,0,0,0	9,13,8,11	0.00171419	0.0289621	0.249	T72vT0 ribosomal depletion
chr1:225785929-225785929	A	G	+	1,4,6,6	64,66,62,65	0,1,1,1	56,50,68,50	0.000262322	0.00646583	0.048	T72vT0 ribosomal depletion
chr1:227130817-227130817	T	C	-	4,2,3,0	9,2,6,9	0,0,0,0	10,4,8,5	4.70391e-06	0.00225846	0.285	T72vT0 ribosomal depletion, mutant A3B
chr1:228274290-228274290	C	T	+	5,3,0,4	26,45,74,59	0,0,0,1	55,50,57,42	0.00192456	0.0315428	0.066	T72vT0 ribosomal depletion
chr1:228431608-228431608	A	G	+	8,7,6,4	19,14,12,13	1,3,2,2	16,20,16,23	0.000147966	0.00404884	0.204	T72vT0 ribosomal depletion
chr1:232490067-232490067	T	C	-	2,1,1,2	6,4,4,6	0,0,0,0	4,7,5,4	0.000576454	0.0123135	0.225	T72vT0 ribosomal depletion
chr1:235111808-235111808	G	A	-	2,9,6,9	48,103,59,63	0,0,0,0	62,67,263,161	8.25078e-11	4.81951e-09	0.084	T24vT0, poly-A enrichment
chr1:235111808-235111808	G	A	-	9,6,11,6	33,31,40,34	0,0,0,0	62,67,263,161	0	0	0.186	T72vT0, poly-A enrichment
chr1:235191542-235191542	T	C	-	5,1,4,1	4,9,7,8	0,2,1,0	7,9,7,10	6.72664e-05	0.0102271	0.206	T72vT0 ribosomal depletion, mutant A3B
chr1:235343773-235343773	C	T	+	2,7,4,5	74,80,92,80	2,0,0,0	111133110135	3.86416e-05	0.000793648	0.047	T24vT0, poly-A enrichment
chr1:235343773-235343773	C	T	+	6,0,1,2	14,34,36,24	2,0,0,0	111133110135	0.00675978	0.049281	0.097	T72vT0, poly-A enrichment
chr1:235402676-235402676	A	G	+	1,3,2,2	15,8,10,5	1,0,0,1	6,12,10,6	0.00163786	0.0279927	0.125	T72vT0 ribosomal depletion
chr1:236544033-236544033	T	C	-	2,5,1,1	2,4,6,5	0,0,0,0	4,7,3,10	4.23759e-06	0.000110125	0.341	T24vT0, poly-A enrichment
chr1:241508745-241508745	G	A	-	6,7,5,7	208181320244	0,0,0,1	446518468473	0.00246027	0.0211449	0.027	T72vT0, poly-A enrichment
chr1:244669049-244669049	A	G	+	3,5,4,5	8,2,4,5	0,4,0,1	6,3,11,8	0.000908181	0.0175699	0.326	T72vT0 ribosomal depletion
chr1:244703459-244703459	A	G	+	1,3,3,2	20,18,8,14	0,1,0,0	9,6,10,14	0.000753886	0.0151787	0.111	T72vT0 ribosomal depletion
chr1:244842369-244842369	G	A	-	1,7,5,4	77117120114	0,0,0,0	102133132159	0.00102313	0.0132404	0.036	T24vT0, poly-A enrichment
chr1:244842369-244842369	G	A	-	3,7,6,5	28,51,37,32	0,0,0,0	25,33,34,34	2.53778e-08	1.66114e-06	0.123	T72vT0 ribosomal depletion
chr1:244842369-244842369	G	A	-	10,8,7,6	62,52,64,54	0,0,0,0	102133132159	1.5099e-14	4.16535e-13	0.118	T72vT0, poly-A enrichment
chr2:10129277-10129277	C	T	+	5,4,5,6	56,75,59,62	0,0,0,0	499516522443	3.45987e-08	2.21418e-06	0.075	T72vT0 ribosomal depletion
chr2:10638279-10638279	T	C	-	0,3,1,3	4,5,11,6	0,0,0,1	15,2,6,12	0.00259244	0.0396469	0.179	T72vT0 ribosomal depletion
chr2:11559034-11559034	C	T	+	2,7,2,5	22,40,34,35	0,0,0,0	14,26,17,14	3.34055e-06	0.000152524	0.103	T72vT0 ribosomal depletion
chr2:11560888-11560888	C	T	+	4,3,4,5	61,44,55,73	0,0,0,0	24,40,31,25	9.46511e-05	0.00278567	0.064	T72vT0 ribosomal depletion
chr2:11586786-11586786	C	T	+	3,5,3,5	76,65,49,79	0,0,0,0	43,29,39,38	0.000174535	0.00461962	0.057	T72vT0 ribosomal depletion
chr2:11640847-11640847	C	T	+	10,20,19,15	73133136116	0,0,0,0	70,69,70,84	1.55431e-15	2.10466e-13	0.122	T72vT0 ribosomal depletion
chr2:11641361-11641361	C	T	+	13,11,13,15	210254249258	0,0,0,0	229319320338	2.0095e-13	1.54151e-11	0.051	T24vT0, poly-A enrichment
chr2:11641361-11641361	C	T	+	38,64,48,54	105162155130	0,0,0,0	97155119103	0	0	0.27	T72vT0 ribosomal depletion
chr2:11641361-11641361	C	T	+	71,84,87,93	256292287328	0,0,0,0	229319320338	0	0	0.224	T72vT0, poly-A enrichment
chr2:11641897-11641897	C	T	+	13,28,54,51	117210195203	0,0,0,0	133239222242	0	0	0.159	T24vT0, poly-A enrichment
chr2:11641897-11641897	C	T	+	49,69,80,70	171149169160	0,0,0,0	126151118114	0	0	0.291	T72vT0 ribosomal depletion
chr2:11641897-11641897	C	T	+	73,70,82,78	200201200238	0,0,0,0	133239222242	0	0	0.266	T72vT0, poly-A enrichment
chr2:15521330-15521330	T	C	-	2,3,2,2	11,11,13,10	0,0,0,0	6,8,8,10	6.85871e-05	0.0021596	0.167	T72vT0 ribosomal depletion
chr2:23841471-23841471	T	C	-	1,2,1,3	2,8,6,3	1,0,1,0	9,8,4,2	0.00128975	0.0230677	0.219	T72vT0 ribosomal depletion
chr2:24133814-24133814	A	G	+	0,1,4,2	3,3,5,7	0,0,0,0	5,6,6,6	0.00119805	0.0217357	0.229	T72vT0 ribosomal depletion
chr2:26039804-26039804	A	G	+	4,6,7,3	2,4,2,4	0,1,1,0	9,6,6,5	4.29285e-10	3.66053e-08	0.547	T72vT0 ribosomal depletion
chr2:26060550-26060550	A	G	+	3,1,3,7	12,8,4,8	0,0,0,0	4,5,1,10	2.25014e-08	1.49772e-06	0.302	T72vT0 ribosomal depletion
chr2:27357897-27357897	A	G	+	3,4,8,8	30,38,33,25	2,3,2,0	36,30,39,34	0.000407877	0.00942059	0.108	T72vT0 ribosomal depletion
chr2:27389887-27389887	T	C	-	2,2,1,2	3,7,7,4	0,0,0,1	7,5,4,6	0.00104633	0.0195659	0.234	T72vT0 ribosomal depletion
chr2:37104881-37104881	T	C	-	3,1,4,5	24,52,55,52	2,2,0,1	46,84,90,93	0.00139567	0.0172884	0.052	T24vT0, poly-A enrichment
chr2:37213687-37213687	T	C	-	1,1,2,3	5,3,4,3	0,0,1,0	6,4,8,3	0.000292941	0.00714241	0.285	T72vT0 ribosomal depletion
chr2:38068374-38068374	G	A	-	37,39,21,37	157129152164	3,2,0,0	195244220201	0	0	0.176	T24vT0, poly-A enrichment
chr2:38068374-38068374	G	A	-	23,42,25,18	98124123110	1,1,0,8	83,113,91,75	4.44089e-16	6.22712e-14	0.159	T72vT0 ribosomal depletion
chr2:38068374-38068374	G	A	-	48,42,47,44	179169211192	3,2,0,0	195244220201	0	0	0.189	T72vT0, poly-A enrichment
chr2:39100699-39100699	T	C	-	3,1,0,3	8,4,9,4	0,0,1,0	6,7,7,11	0.00114099	0.0493796	0.194	T72vT0 ribosomal depletion, mutant A3B
chr2:39105376-39105376	T	C	-	5,4,5,8	10,13,5,7	3,3,0,3	14,8,18,14	0.00201407	0.0327209	0.244	T72vT0 ribosomal depletion
chr2:44210500-44210500	A	G	+	7,3,1,6	14,26,17,24	2,1,1,1	27,16,18,23	0.00149047	0.025923	0.118	T72vT0 ribosomal depletion
chr2:44472210-44472210	A	G	+	3,1,1,4	19,6,10,11	0,0,0,2	8,6,9,5	0.000615871	0.0353235	0.088	T72vT0 ribosomal depletion, mutant A3B
chr2:47482636-47482636	C	T	+	3,4,4,1	15,16,6,6	0,1,0,0	6,12,9,4	4.97338e-06	6.89235e-05	0.208	T72vT0, poly-A enrichment
chr2:47796703-47796703	A	G	+	7,1,1,2	6,5,1,5	0,1,0,0	6,9,7,3	1.08965e-07	0.000213003	0.348	T72vT0 ribosomal depletion, mutant A3B
chr2:54972569-54972569	G	A	-	22,23,10,11	511585543563	0,0,0,0	552606563596	6.43245e-10	3.47339e-08	0.029	T24vT0, poly-A enrichment
chr2:54972569-54972569	G	A	-	11,20,21,17	95196168128	0,0,0,0	107141105100	0	0	0.106	T72vT0 ribosomal depletion
chr2:54972569-54972569	G	A	-	23,23,35,30	214216312276	0,0,0,0	552606563596	0	0	0.098	T72vT0, poly-A enrichment
chr2:54973109-54973109	G	A	-	11,6,3,6	171248228238	0,0,0,0	482513449418	0.000424496	0.00627092	0.03	T24vT0, poly-A enrichment
chr2:54973109-54973109	G	A	-	27,22,17,19	67,86,76,58	0,0,0,0	163182177190	0	0	0.23	T72vT0 ribosomal depletion
chr2:54973109-54973109	G	A	-	36,40,56,39	134169268186	0,0,0,0	482513449418	0	0	0.187	T72vT0, poly-A enrichment
chr2:54977934-54977934	G	A	-	1,4,2,4	19,20,20,13	0,0,0,0	16,16,14,21	2.70972e-05	0.000964918	0.136	T72vT0 ribosomal depletion
chr2:54977934-54977934	G	A	-	1,1,2,4	20,18,9,20	0,0,0,0	21,17,20,10	0.00599622	0.0445433	0.112	T72vT0, poly-A enrichment
chr2:55227435-55227435	T	C	-	2,6,2,4	5,4,1,7	0,1,0,0	2,6,8,3	7.92795e-08	3.0408e-06	0.443	T24vT0, poly-A enrichment
chr2:58172547-58172547	T	C	-	2,2,2,3	12,10,8,9	0,0,1,2	7,17,15,5	0.00253196	0.0388672	0.103	T72vT0 ribosomal depletion
chr2:58172582-58172582	T	C	-	4,3,7,7	8,5,3,5	0,1,3,0	7,9,7,7	7.98164e-06	0.000324511	0.398	T72vT0 ribosomal depletion
chr2:61336407-61336407	T	C	-	5,5,11,14	3,2,5,3	1,2,3,7	5,8,7,3	0.00147707	0.0257325	0.371	T72vT0 ribosomal depletion
chr2:61448229-61448229	T	C	-	2,4,0,2	9,12,9,11	1,0,1,0	9,7,10,9	0.00213069	0.0341756	0.099	T72vT0 ribosomal depletion
chr2:61533855-61533855	G	A	-	13,7,2,16	364381374358	0,0,0,2	350379386354	7.49696e-05	0.00231211	0.024	T72vT0 ribosomal depletion
chr2:64551824-64551824	C	T	+	7,5,6,6	122127135147	0,0,0,0	93157148161	6.52795e-06	0.000161726	0.043	T24vT0, poly-A enrichment
chr2:64551824-64551824	C	T	+	5,13,12,9	21,46,41,40	0,0,0,0	44,44,41,34	4.21885e-15	5.45511e-13	0.206	T72vT0 ribosomal depletion
chr2:64551824-64551824	C	T	+	5,4,9,5	16,15,31,16	0,0,0,0	93157148161	0	0	0.228	T72vT0, poly-A enrichment
chr2:64555486-64555486	A	G	+	5,4,3,4	12,9,10,10	0,0,3,0	8,8,8,12	3.76092e-05	0.00128139	0.211	T72vT0 ribosomal depletion
chr2:65259034-65259034	A	G	+	0,1,4,2	8,8,6,4	0,0,0,0	5,14,4,4	0.00260854	0.0398352	0.211	T72vT0 ribosomal depletion
chr2:65312303-65312303	C	T	-	8,11,12,2	77106134106	1,6,4,2	90113112129	0.000906087	0.0119442	0.044	T24vT0, poly-A enrichment
chr2:68212360-68212360	T	C	-	5,3,1,2	2,2,4,18	0,0,1,2	5,4,7,5	0.000414039	0.00951416	0.301	T72vT0 ribosomal depletion
chr2:70072318-70072318	T	C	-	2,5,4,2	3,0,0,5	0,0,0,1	6,8,2,8	1.6668e-09	1.31469e-07	0.644	T72vT0 ribosomal depletion
chr2:70221464-70221464	T	C	-	3,2,0,3	11,10,3,21	0,0,0,0	6,12,13,7	0.0012109	0.0219311	0.126	T72vT0 ribosomal depletion
chr2:70506791-70506791	T	C	-	2,5,2,7	3,9,9,3	2,0,1,1	7,5,6,5	0.000900108	0.0174867	0.277	T72vT0 ribosomal depletion
chr2:70513935-70513935	G	A	-	10,12,6,1	9,4,6,7	0,0,0,1	8,2,11,3	8.15135e-09	5.81844e-07	0.413	T72vT0 ribosomal depletion
chr2:71131310-71131310	A	G	+	2,0,7,2	9,15,7,7	0,1,0,0	1,7,7,6	1.69362e-05	0.000638395	0.195	T72vT0 ribosomal depletion
chr2:71332096-71332096	C	T	+	6,7,5,8	37,38,27,29	0,0,0,0	23,24,21,24	1.22425e-09	9.85336e-08	0.167	T72vT0 ribosomal depletion
chr2:71345694-71345694	A	G	+	1,3,2,4	7,9,6,10	0,0,0,1	4,6,12,8	1.64741e-05	0.000625626	0.2	T72vT0 ribosomal depletion
chr2:73835102-73835102	A	G	+	5,4,4,10	15,8,7,9	1,0,0,1	8,13,8,5	6.88591e-08	4.27658e-06	0.299	T72vT0 ribosomal depletion
chr2:74208631-74208631	C	T	+	13,10,14,10	130153148131	0,0,0,0	453447383416	0	0	0.077	T72vT0 ribosomal depletion
chr2:74459199-74459199	C	T	+	3,1,6,8	58,75,79,97	2,0,0,0	104153139164	1.69453e-05	0.000219745	0.048	T72vT0, poly-A enrichment
chr2:84906419-84906419	C	T	+	22,21,26,21	271229223229	0,1,1,0	757689590645	0	0	0.086	T24vT0, poly-A enrichment
chr2:84906419-84906419	C	T	+	40,28,48,31	90,76,84,81	1,0,0,3	484475507384	0	0	0.302	T72vT0 ribosomal depletion
chr2:85029226-85029226	A	G	+	3,4,2,0	2,5,4,8	1,0,1,0	8,5,11,4	8.08689e-05	0.00246275	0.296	T72vT0 ribosomal depletion
chr2:85321573-85321573	G	A	-	5,7,5,12	121243250250	0,0,0,0	172330308313	1.84129e-05	0.000402868	0.033	T24vT0, poly-A enrichment
chr2:85321573-85321573	G	A	-	8,8,12,7	57,48,54,49	0,0,0,0	67,93,110,76	2.66454e-15	3.50275e-13	0.143	T72vT0 ribosomal depletion
chr2:85321573-85321573	G	A	-	15,19,12,17	96,91,90,117	0,0,0,0	172330308313	0	0	0.138	T72vT0, poly-A enrichment
chr2:86137885-86137885	C	T	+	3,2,6,6	83,85,79,75	1,0,0,1	83,89,80,71	0.000231396	0.00582179	0.044	T72vT0 ribosomal depletion
chr2:86137885-86137885	C	T	+	5,3,5,5	88,100,102,97	0,0,0,0	89178165151	0.000113968	0.00129032	0.045	T72vT0, poly-A enrichment
chr2:86144236-86144236	G	A	-	20,19,10,7	164185188235	0,0,0,0	196218197160	6.66134e-15	5.97363e-13	0.07	T24vT0, poly-A enrichment
chr2:86144236-86144236	G	A	-	20,35,40,27	88,66,73,61	0,0,0,0	77,81,83,107	0	0	0.298	T72vT0 ribosomal depletion
chr2:86144236-86144236	G	A	-	59,51,59,64	141146155148	0,0,0,0	196218197160	0	0	0.283	T72vT0, poly-A enrichment
chr2:95832833-95832833	T	C	-	2,4,0,2	17,9,10,10	0,0,1,0	21,20,15,21	0.00046997	0.0300506	0.129	T72vT0 ribosomal depletion, mutant A3B
chr2:96808162-96808162	A	G	+	2,3,5,3	18,21,14,19	0,1,2,2	5,29,25,43	0.00289522	0.0243086	0.118	T72vT0, poly-A enrichment
chr2:98521663-98521663	A	G	+	2,1,3,7	8,6,9,9	0,1,0,2	6,4,8,9	0.000179265	0.00472424	0.162	T72vT0 ribosomal depletion
chr2:98521670-98521670	A	G	+	1,2,2,7	7,6,10,8	0,1,0,2	5,4,7,6	0.000570952	0.0122209	0.14	T72vT0 ribosomal depletion
chr2:99550197-99550197	G	A	-	2,1,0,0	10,2,2,7	0,0,5,5	13,10,17,14	0.00422397	0.0338609	0.002	T72vT0, poly-A enrichment
chr2:100074227-100074227	G	A	-	5,3,3,5	10,9,9,12	0,0,0,0	8,9,17,11	2.18469e-09	1.69771e-07	0.282	T72vT0 ribosomal depletion
chr2:102688466-102688466	A	G	+	0,6,3,8	1,3,7,12	0,0,2,0	1,8,4,9	9.43411e-06	0.000226219	0.258	T24vT0, poly-A enrichment
chr2:102688466-102688466	A	G	+	5,1,3,0	3,2,4,9	0,0,2,0	1,8,4,9	5.19314e-05	0.000624027	0.263	T72vT0, poly-A enrichment
chr2:105382442-105382442	G	A	-	13,15,14,17	33,32,30,37	0,0,0,0	40,35,34,39	0	0	0.309	T72vT0 ribosomal depletion
chr2:105382442-105382442	G	A	-	2,1,1,1	7,5,5,5	0,0,0,0	4,7,9,9	0.00506901	0.0390886	0.181	T72vT0, poly-A enrichment
chr2:105893853-105893853	C	T	+	4,1,2,2	10,10,15,7	0,0,0,0	13,19,19,17	7.66295e-05	0.00235966	0.179	T72vT0 ribosomal depletion
chr2:105893853-105893853	C	T	+	5,2,3,2	20,16,23,23	0,0,0,0	57,53,65,70	3.38821e-06	4.80897e-05	0.127	T72vT0, poly-A enrichment
chr2:108551054-108551054	A	G	+	1,2,2,1	3,7,6,4	0,0,1,0	6,12,15,5	0.000607274	0.0128329	0.215	T72vT0 ribosomal depletion
chr2:112236836-112236836	T	C	-	4,1,1,2	10,11,8,3	0,0,0,0	7,8,7,6	0.000392539	0.00916052	0.22	T72vT0 ribosomal depletion
chr2:120059802-120059802	A	G	+	1,3,1,2	7,6,6,4	0,0,2,0	4,3,7,6	0.00235279	0.0367842	0.178	T72vT0 ribosomal depletion
chr2:120403549-120403549	C	T	+	8,5,3,6	15,15,8,9	0,0,0,1	5,5,10,12	1.15404e-08	8.0198e-07	0.298	T72vT0 ribosomal depletion
chr2:121729625-121729625	T	C	-	5,2,10,2	0,10,6,2	0,2,1,0	8,8,4,6	4.357e-06	0.000112312	0.473	T24vT0, poly-A enrichment
chr2:127270160-127270160	T	C	-	4,2,3,9	6,11,9,10	0,1,2,1	2,10,7,8	0.000854838	0.0168143	0.213	T72vT0 ribosomal depletion
chr2:127740374-127740374	G	A	-	1,2,3,3	0,3,5,3	0,0,1,0	1,3,8,7	1.81368e-06	5.22521e-05	0.541	T24vT0, poly-A enrichment
chr2:127740374-127740374	G	A	-	8,6,5,6	10,10,8,17	0,0,5,3	22,27,15,19	1.74766e-05	0.000656414	0.27	T72vT0 ribosomal depletion
chr2:127780754-127780754	T	C	-	2,2,1,4	12,12,15,23	0,0,0,0	7,7,4,13	0.000326918	0.00787949	0.124	T72vT0 ribosomal depletion
chr2:127793523-127793523	T	C	-	3,2,1,2	18,10,11,12	0,0,0,1	3,7,5,6	0.00186244	0.0307483	0.098	T72vT0 ribosomal depletion
chr2:127796554-127796554	T	C	-	19,10,22,13	16,11,9,7	0,1,2,15	6,10,6,13	0.001262	0.0226781	0.376	T72vT0 ribosomal depletion
chr2:127801261-127801261	T	C	-	4,4,4,7	30,50,49,56	0,1,0,1	13,10,32,30	8.34977e-05	0.0025113	0.064	T72vT0 ribosomal depletion
chr2:131080403-131080403	T	C	-	3,0,3,4	18,24,13,30	0,0,0,0	16,22,27,13	0.000367302	0.00866096	0.112	T72vT0 ribosomal depletion
chr2:131089239-131089239	T	C	-	1,3,3,3	7,7,8,7	1,0,0,1	10,8,7,6	6.80142e-05	0.00214995	0.191	T72vT0 ribosomal depletion
chr2:131487261-131487261	T	C	-	3,1,2,6	4,0,4,9	0,1,1,0	16,6,3,4	6.30157e-06	0.000266357	0.442	T72vT0 ribosomal depletion
chr2:152007656-152007656	T	C	-	4,1,5,0	24,19,15,17	3,0,0,0	15,7,8,7	0.000732195	0.0387582	0.069	T72vT0 ribosomal depletion, mutant A3B
chr2:152162527-152162527	T	C	-	2,2,4,2	3,4,3,9	0,1,0,2	5,9,1,2	0.00132213	0.0235269	0.222	T72vT0 ribosomal depletion
chr2:158481395-158481395	A	G	+	4,2,2,1	27,29,20,20	0,0,0,0	11,17,17,19	0.00273824	0.0413554	0.083	T72vT0 ribosomal depletion
chr2:158496758-158496758	C	T	+	4,1,1,5	21,11,8,19	0,0,0,1	8,11,6,10	7.27835e-05	0.00225572	0.118	T72vT0 ribosomal depletion
chr2:164833348-164833348	T	C	-	4,4,3,1	6,2,2,8	0,0,0,1	2,10,11,8	1.64621e-07	9.72622e-06	0.417	T72vT0 ribosomal depletion
chr2:169835236-169835236	A	G	+	2,3,2,1	8,8,4,9	0,1,1,0	7,9,5,6	0.000820989	0.0162805	0.16	T72vT0 ribosomal depletion
chr2:173936163-173936163	T	C	-	3,1,3,6	6,9,2,6	0,0,1,0	3,7,7,6	6.58731e-07	3.47402e-05	0.352	T72vT0 ribosomal depletion
chr2:173940108-173940108	T	C	-	4,3,2,1	13,16,11,16	0,0,0,2	10,14,21,4	0.000854027	0.0168143	0.068	T72vT0 ribosomal depletion
chr2:174209082-174209082	T	C	-	2,2,4,1	15,19,19,7	0,0,0,0	14,13,12,11	7.87498e-05	0.0115248	0.128	T72vT0 ribosomal depletion, mutant A3B
chr2:182990281-182990281	T	C	-	5,1,1,2	14,15,10,12	0,1,0,1	6,3,12,10	0.00180682	0.0301296	0.055	T72vT0 ribosomal depletion
chr2:182990317-182990317	T	C	-	2,3,4,4	11,8,5,9	0,1,0,0	5,6,8,8	6.44441e-07	3.41716e-05	0.259	T72vT0 ribosomal depletion
chr2:189747118-189747118	T	C	-	3,2,1,3	6,19,14,17	0,0,0,1	6,11,20,11	0.000541623	0.00774947	0.14	T24vT0, poly-A enrichment
chr2:190238561-190238561	T	C	-	5,1,2,1	9,7,9,10	0,1,0,0	9,6,5,9	0.00012798	0.00358824	0.153	T72vT0 ribosomal depletion
chr2:197496908-197496908	T	C	-	3,1,1,3	13,6,9,18	0,1,1,0	9,6,7,15	0.000534252	0.0328559	0.076	T72vT0 ribosomal depletion, mutant A3B
chr2:201056424-201056424	T	C	-	2,2,4,0	8,8,9,3	0,0,0,2	6,5,8,5	0.00137536	0.0243778	0.105	T72vT0 ribosomal depletion
chr2:202227018-202227018	T	C	-	0,2,4,4	4,2,4,6	0,2,1,0	7,6,5,4	7.1117e-05	0.0107248	0.246	T72vT0 ribosomal depletion, mutant A3B
chr2:202285603-202285603	A	G	+	1,3,3,1	12,18,17,12	0,0,1,0	17,14,19,17	0.00224013	0.0355514	0.099	T72vT0 ribosomal depletion
chr2:202404856-202404856	A	G	+	17,14,13,11	16,8,12,5	6,7,3,8	19,10,11,14	0.000931879	0.017903	0.282	T72vT0 ribosomal depletion
chr2:202428659-202428659	A	G	+	5,3,6,8	15,14,12,12	0,0,3,4	20,14,8,21	0.00112369	0.0205999	0.182	T72vT0 ribosomal depletion
chr2:203029270-203029270	A	G	+	3,4,2,4	13,10,10,14	0,1,0,1	18,10,11,8	1.28146e-05	0.000500372	0.165	T72vT0 ribosomal depletion
chr2:203384545-203384545	A	G	+	2,2,3,1	6,8,9,13	0,0,0,1	14,10,11,14	0.000387486	0.0090557	0.176	T72vT0 ribosomal depletion
chr2:206134963-206134963	T	C	-	1,1,3,2	6,7,8,7	0,0,1,0	7,8,8,7	0.00237745	0.0370595	0.163	T72vT0 ribosomal depletion
chr2:212336646-212336646	G	A	-	1,2,4,4	9,16,16,17	0,0,0,0	16,20,19,35	6.31489e-06	0.000266357	0.15	T72vT0 ribosomal depletion
chr2:212431874-212431874	G	A	-	4,2,4,2	21,18,23,20	0,0,0,0	14,30,28,25	8.25467e-06	0.00033518	0.125	T72vT0 ribosomal depletion
chr2:212516876-212516876	G	A	-	3,9,3,5	40,59,47,51	0,0,0,0	27,57,42,55	2.85156e-07	1.62688e-05	0.088	T72vT0 ribosomal depletion
chr2:212536513-212536513	G	A	-	14,21,15,17	70,61,71,59	0,0,0,5	62,55,98,78	0	0	0.19	T72vT0 ribosomal depletion
chr2:216674993-216674993	G	A	-	66,58,45,39	745748843780	0,0,0,0	1473151214751480	0	0	0.063	T24vT0, poly-A enrichment
chr2:216674993-216674993	G	A	-	111128146153	506469472464	0,0,0,0	105211111087807	0	0	0.22	T72vT0 ribosomal depletion
chr2:216674993-216674993	G	A	-	145144185148	615621647680	0,0,0,0	1473151214751480	0	0	0.195	T72vT0, poly-A enrichment
chr2:216676344-216676344	G	A	-	21,29,27,5	511745746782	0,0,0,0	1000129114191370	6.1291e-12	4.15149e-10	0.03	T24vT0, poly-A enrichment
chr2:216676344-216676344	G	A	-	77,73,91,60	502472501484	1,0,1,0	10221042959685	0	0	0.132	T72vT0 ribosomal depletion
chr2:216676344-216676344	G	A	-	85,87,72,76	541607526507	0,0,0,0	1000129114191370	0	0	0.128	T72vT0, poly-A enrichment
chr2:218659987-218659987	C	T	+	2,3,3,3	16,29,25,31	0,0,0,0	23,38,29,33	0.000110667	0.00199608	0.1	T24vT0, poly-A enrichment
chr2:218659987-218659987	C	T	+	2,2,2,4	9,4,11,19	0,0,0,0	14,18,15,10	1.10259e-05	0.000439783	0.211	T72vT0 ribosomal depletion
chr2:218659987-218659987	C	T	+	8,6,3,6	24,15,15,25	0,0,0,0	23,38,29,33	7.53542e-12	1.75707e-10	0.224	T72vT0, poly-A enrichment
chr2:219236857-219236857	T	C	-	4,3,2,1	31,21,17,23	0,0,0,0	22,28,28,22	0.000373998	0.00558978	0.097	T24vT0, poly-A enrichment
chr2:229879240-229879240	T	C	-	6,1,2,3	17,12,13,15	2,0,0,2	19,14,19,21	0.00111623	0.0205588	0.114	T72vT0 ribosomal depletion
chr2:231047420-231047420	A	G	+	27,25,30,37	48,40,42,61	31,50,38,51	80159151158	2.43439e-05	0.00030962	0.144	T72vT0, poly-A enrichment
chr2:231769738-231769738	T	C	-	2,3,3,1	9,8,7,4	0,1,0,0	7,10,7,6	3.0639e-05	0.00107168	0.216	T72vT0 ribosomal depletion
chr2:232582727-232582727	C	T	+	4,3,1,2	25,26,30,21	0,0,0,0	36,27,28,23	0.000679924	0.0140759	0.09	T72vT0 ribosomal depletion
chr2:232635801-232635801	A	G	+	0,4,4,4	23,23,19,26	0,3,1,1	31,36,43,47	0.0031251	0.0456256	0.084	T72vT0 ribosomal depletion
chr2:232661027-232661027	A	G	+	3,0,2,2	8,2,4,8	0,0,1,0	5,10,6,9	0.00164762	0.028129	0.166	T72vT0 ribosomal depletion
chr2:232857535-232857535	C	T	+	3,6,4,5	63107108100	0,0,0,0	87,111,133,96	0.000105556	0.00191475	0.045	T24vT0, poly-A enrichment
chr2:232857535-232857535	C	T	+	12,14,16,16	53,53,64,52	0,0,0,0	80,80,85,88	0	0	0.207	T72vT0 ribosomal depletion
chr2:232857535-232857535	C	T	+	9,8,10,9	39,48,49,39	0,0,0,0	87,111,133,96	0	0	0.172	T72vT0, poly-A enrichment
chr2:232878817-232878817	T	C	-	8,3,4,3	31,37,37,26	3,0,1,0	45,56,59,79	1.41832e-06	2.08873e-05	0.1	T72vT0, poly-A enrichment
chr2:233367966-233367966	A	G	+	2,2,0,3	6,10,3,7	0,0,0,1	1,4,6,8	0.00242722	0.0376123	0.151	T72vT0 ribosomal depletion
chr2:235517163-235517163	C	T	+	8,4,4,4	40,37,50,47	0,0,0,3	38,49,50,38	4.74935e-06	0.000208694	0.086	T72vT0 ribosomal depletion
chr2:235635843-235635843	A	G	+	3,0,4,4	10,3,14,14	0,1,0,2	9,13,2,10	0.000114484	0.0136675	0.109	T72vT0 ribosomal depletion, mutant A3B
chr2:235637556-235637556	A	G	+	1,2,1,4	8,14,5,7	0,0,0,1	6,7,8,6	0.000528189	0.0114927	0.156	T72vT0 ribosomal depletion
chr2:237512828-237512828	C	T	+	37,79,69,55	497587540540	0,0,0,0	375476486495	0	0	0.098	T24vT0, poly-A enrichment
chr2:237512828-237512828	C	T	+	209133193154	532450390528	0,0,0,1	529521525590	0	0	0.266	T72vT0 ribosomal depletion
chr2:237512828-237512828	C	T	+	132115148185	345361335423	0,0,0,0	375476486495	0	0	0.282	T72vT0, poly-A enrichment
chr2:237512866-237512866	C	T	+	51,72,67,68	487663600609	3,1,1,3	378538524547	0	0	0.094	T24vT0, poly-A enrichment
chr2:237512866-237512866	C	T	+	130,90,88,95	641502510585	1,0,0,29	547552568571	0	0	0.139	T72vT0 ribosomal depletion
chr2:237512866-237512866	C	T	+	86,107,91,118	406412445512	3,1,1,3	378538524547	0	0	0.18	T72vT0, poly-A enrichment
chr2:237513030-237513030	C	T	+	5,6,4,12	138252249282	1,0,0,0	185311300302	0.000327477	0.00342394	0.027	T72vT0, poly-A enrichment
chr2:237514683-237514683	C	T	+	12,22,10,22	458850800845	0,0,0,1	372552590650	4.65255e-06	0.000119447	0.022	T24vT0, poly-A enrichment
chr2:237514683-237514683	C	T	+	23,28,17,21	783747763834	0,1,0,3	593610722754	5.32638e-11	5.06167e-09	0.026	T72vT0 ribosomal depletion
chr2:237514683-237514683	C	T	+	23,19,17,26	581571545620	0,0,0,1	372552590650	3.33067e-14	8.93653e-13	0.035	T72vT0, poly-A enrichment
chr2:237515461-237515461	C	T	+	29,61,58,86	492696631638	0,0,0,0	360558522537	0	0	0.085	T24vT0, poly-A enrichment
chr2:237515461-237515461	C	T	+	89,57,84,86	447374355437	0,0,0,0	349369378433	0	0	0.164	T72vT0 ribosomal depletion
chr2:237515461-237515461	C	T	+	101113108111	540506546597	0,0,0,0	360558522537	0	0	0.166	T72vT0, poly-A enrichment
chr2:237515813-237515813	A	G	+	12,13,22,17	294599567541	2,1,4,6	181336401366	9.25848e-06	0.000223291	0.022	T24vT0, poly-A enrichment
chr2:237515813-237515813	A	G	+	15,15,20,10	396402380383	8,2,7,5	374298311395	0.000156788	0.00423407	0.021	T72vT0 ribosomal depletion
chr2:237515813-237515813	A	G	+	19,34,24,24	444410394402	2,1,4,6	181336401366	9.09273e-14	2.38522e-12	0.048	T72vT0, poly-A enrichment
chr2:237515827-237515827	A	G	+	12,31,22,15	285586548542	5,8,8,6	178336410353	0.00155772	0.0190426	0.017	T24vT0, poly-A enrichment
chr2:237515827-237515827	A	G	+	14,16,24,14	441438372433	5,8,8,6	178336410353	0.0026352	0.0224412	0.018	T72vT0, poly-A enrichment
chr2:237658793-237658793	A	G	+	3,0,5,0	14,12,9,10	0,0,1,0	11,16,12,18	0.000963335	0.0449764	0.114	T72vT0 ribosomal depletion, mutant A3B
chr2:241167111-241167111	C	T	+	3,3,3,4	67,57,65,52	0,0,0,0	85,79,68,79	0.00138243	0.0125552	0.052	T72vT0, poly-A enrichment
chr2:241331161-241331161	A	G	+	3,1,3,4	7,8,6,5	2,0,0,0	4,3,7,8	7.15821e-05	0.00222285	0.214	T72vT0 ribosomal depletion
chr2:241594847-241594847	T	C	-	2,2,3,2	7,6,10,7	0,0,1,1	2,8,8,6	0.000271652	0.00667549	0.168	T72vT0 ribosomal depletion
chr2:241687513-241687513	C	T	+	4,6,3,4	27,39,30,43	0,0,0,1	10,21,35,37	5.21714e-06	0.000132341	0.103	T24vT0, poly-A enrichment
chr2:241687513-241687513	C	T	+	6,3,7,5	23,24,33,23	0,0,0,1	10,21,35,37	1.39923e-08	2.51433e-07	0.161	T72vT0, poly-A enrichment
chr3:8416981-8416981	T	C	-	4,4,6,2	18,15,12,15	4,0,0,0	10,12,14,7	0.00138277	0.0244298	0.139	T72vT0 ribosomal depletion
chr3:9464778-9464778	C	T	+	3,3,3,3	27,31,34,34	0,0,0,0	22,15,32,48	9.99549e-05	0.00182877	0.088	T24vT0, poly-A enrichment
chr3:9476939-9476939	C	T	+	23,15,24,19	131136158134	0,0,0,0	152158159168	0	0	0.126	T72vT0 ribosomal depletion
chr3:9894924-9894924	A	G	+	6,8,4,9	10,13,8,16	2,1,0,0	8,6,11,11	4.15682e-07	2.31562e-05	0.277	T72vT0 ribosomal depletion
chr3:9947899-9947899	T	C	-	5,3,4,1	47,49,50,42	1,0,0,0	31,22,36,20	0.000713433	0.0146161	0.055	T72vT0 ribosomal depletion
chr3:10151674-10151674	A	G	+	6,8,10,14	33,81,85,52	3,1,10,4	40,78,111,95	0.000373575	0.00558978	0.089	T24vT0, poly-A enrichment
chr3:11808304-11808304	G	A	-	1,3,4,1	26,21,22,12	0,0,0,1	22,20,25,10	0.00166739	0.0283439	0.075	T72vT0 ribosomal depletion
chr3:12590521-12590521	T	C	-	0,6,2,1	19,19,15,19	0,0,0,0	21,8,12,17	0.00131899	0.0234843	0.102	T72vT0 ribosomal depletion
chr3:12617495-12617495	T	C	-	2,2,3,2	3,4,9,4	1,1,0,0	7,3,7,11	6.08043e-05	0.00195753	0.235	T72vT0 ribosomal depletion
chr3:14198054-14198054	C	T	+	5,12,8,5	117106102122	0,0,0,2	448457450446	2.17123e-11	2.09487e-09	0.063	T72vT0 ribosomal depletion
chr3:15423530-15423530	T	C	-	4,0,3,1	25,10,11,7	1,0,0,0	12,7,7,6	0.00091189	0.0434768	0.1	T72vT0 ribosomal depletion, mutant A3B
chr3:18405662-18405662	G	A	-	7,9,4,3	11,13,11,11	0,0,0,0	19,27,19,22	5.09259e-13	5.69756e-11	0.32	T72vT0 ribosomal depletion
chr3:18468558-18468558	A	G	+	1,6,11,2	8,21,9,30	0,1,1,0	7,9,9,11	2.31284e-05	0.000492502	0.186	T24vT0, poly-A enrichment
chr3:20180114-20180114	T	C	-	4,1,3,2	6,3,8,10	0,0,0,0	2,7,4,7	9.34155e-07	2.84582e-05	0.272	T24vT0, poly-A enrichment
chr3:23249015-23249015	A	G	+	2,4,1,3	7,3,6,7	1,0,0,2	17,6,9,10	5.69721e-05	0.00185306	0.254	T72vT0 ribosomal depletion
chr3:23921714-23921714	A	G	+	1,4,2,1	13,9,3,3	1,0,0,0	11,4,3,8	0.000275188	0.006745	0.236	T72vT0 ribosomal depletion
chr3:25721266-25721266	T	C	-	6,2,0,6	4,3,4,4	2,0,2,0	4,5,6,4	0.00106407	0.0472847	0.254	T72vT0 ribosomal depletion, mutant A3B
chr3:31976515-31976515	T	C	-	0,1,5,3	19,13,17,9	0,0,1,0	9,8,4,17	0.000937483	0.0179694	0.087	T72vT0 ribosomal depletion
chr3:32760547-32760547	A	G	+	5,4,2,3	7,4,6,6	0,0,0,0	6,3,6,6	2.5e-11	6.84175e-07	0.375	T72vT0 ribosomal depletion, mutant A3B
chr3:33013760-33013760	T	C	-	7,3,3,2	13,11,16,9	3,0,0,0	15,8,17,7	3.31324e-05	0.00114997	0.184	T72vT0 ribosomal depletion
chr3:37000461-37000461	A	G	+	3,2,2,1	3,6,5,8	0,0,0,0	7,5,14,7	6.80761e-05	0.00214995	0.287	T72vT0 ribosomal depletion
chr3:37044423-37044423	A	G	+	9,5,10,6	4,5,4,3	0,7,6,12	1,17,19,16	0.00137983	0.0125509	0.403	T72vT0, poly-A enrichment
chr3:37270237-37270237	A	G	+	1,1,3,3	9,14,6,8	0,0,0,0	5,6,7,8	0.000537591	0.0116731	0.193	T72vT0 ribosomal depletion
chr3:37274450-37274450	A	G	+	2,6,2,4	13,16,16,5	1,0,0,1	4,8,10,8	3.56175e-05	0.00122278	0.163	T72vT0 ribosomal depletion
chr3:37282219-37282219	C	T	+	9,12,13,14	304314320319	0,1,1,6	290258288297	3.2383e-07	1.83426e-05	0.03	T72vT0 ribosomal depletion
chr3:37282219-37282219	C	T	+	10,6,4,7	232225232310	0,0,0,1	268326288264	0.000936236	0.00887121	0.026	T72vT0, poly-A enrichment
chr3:38499750-38499750	A	G	+	4,1,0,2	8,4,6,8	0,1,0,0	6,3,5,5	0.00113819	0.0493796	0.121	T72vT0 ribosomal depletion, mutant A3B
chr3:39102334-39102334	G	A	-	4,1,4,4	32,49,51,55	0,0,0,0	46,48,37,50	0.000255513	0.00409786	0.068	T24vT0, poly-A enrichment
chr3:39102334-39102334	G	A	-	1,2,7,1	28,25,41,37	0,0,0,1	39,63,45,40	0.000622131	0.0130768	0.064	T72vT0 ribosomal depletion
chr3:39104323-39104323	G	A	-	2,3,3,3	8,5,4,4	0,0,0,0	4,9,7,5	2.00821e-08	8.5242e-07	0.358	T24vT0, poly-A enrichment
chr3:39409475-39409475	A	G	+	1,3,4,1	14,26,7,15	0,1,0,0	7,22,17,15	0.000964254	0.00908243	0.138	T72vT0, poly-A enrichment
chr3:42527856-42527856	C	T	+	3,3,3,3	11,36,34,27	0,0,0,0	20,28,44,37	4.31462e-05	0.000866598	0.118	T24vT0, poly-A enrichment
chr3:43421352-43421352	T	C	-	2,2,3,4	18,21,15,16	0,0,0,0	9,10,11,10	3.64825e-05	0.0012484	0.138	T72vT0 ribosomal depletion
chr3:45680709-45680709	A	G	+	2,3,7,6	24,66,64,71	0,2,1,3	24,51,73,73	0.00286451	0.0321098	0.052	T24vT0, poly-A enrichment
chr3:47153085-47153085	T	C	-	4,1,3,2	11,12,7,11	0,0,0,1	6,6,3,13	3.03158e-05	0.00106156	0.182	T72vT0 ribosomal depletion
chr3:47344505-47344505	C	T	+	0,1,2,8	44,47,52,48	0,1,0,0	42,57,55,54	0.0054371	0.041197	0.046	T72vT0, poly-A enrichment
chr3:47463692-47463692	T	C	-	6,7,3,2	11,12,4,9	0,0,1,1	5,8,10,8	6.41228e-07	3.40585e-05	0.282	T72vT0 ribosomal depletion
chr3:47492225-47492225	T	C	-	2,1,3,2	8,3,4,7	1,0,0,1	6,3,4,8	0.000402957	0.009348	0.212	T72vT0 ribosomal depletion
chr3:47770563-47770563	T	C	-	1,1,3,4	10,9,4,9	0,0,0,0	11,10,9,6	3.66993e-05	0.00125446	0.232	T72vT0 ribosomal depletion
chr3:47770571-47770571	T	C	-	0,2,3,5	11,8,4,8	0,0,0,0	11,10,8,5	4.61629e-06	0.00020313	0.253	T72vT0 ribosomal depletion
chr3:47838897-47838897	A	G	+	2,3,0,3	14,6,7,13	1,1,0,0	8,6,13,13	0.00211951	0.0340308	0.098	T72vT0 ribosomal depletion
chr3:47993264-47993264	T	C	-	2,1,4,1	12,6,12,8	0,0,1,0	6,6,7,7	0.000647792	0.013526	0.13	T72vT0 ribosomal depletion
chr3:48706334-48706334	T	C	-	3,1,2,4	13,19,12,9	0,0,0,1	13,13,9,10	9.93679e-05	0.00289479	0.149	T72vT0 ribosomal depletion
chr3:48928112-48928112	C	T	+	3,3,3,3	18,20,28,36	0,0,0,0	21,33,46,42	2.18783e-05	0.000470606	0.112	T24vT0, poly-A enrichment
chr3:48933200-48933200	A	G	+	5,2,3,7	30,21,24,20	1,2,1,0	13,23,19,15	0.000997167	0.01885	0.1	T72vT0 ribosomal depletion
chr3:48972351-48972351	A	G	+	2,2,2,2	6,4,10,12	0,0,0,1	12,6,8,10	7.99651e-05	0.0115498	0.2	T72vT0 ribosomal depletion, mutant A3B
chr3:49042374-49042374	T	C	-	4,1,4,5	8,8,9,9	0,0,0,1	8,4,8,10	4.2485e-07	2.35986e-05	0.255	T72vT0 ribosomal depletion
chr3:49100431-49100431	G	A	-	7,9,10,15	541491537561	0,0,0,0	518810785784	0.00544058	0.041197	0.019	T72vT0, poly-A enrichment
chr3:49320009-49320009	T	C	-	3,2,4,2	10,4,12,5	0,1,2,1	6,16,10,17	0.000666572	0.00652796	0.205	T72vT0, poly-A enrichment
chr3:49329431-49329431	T	C	-	0,1,3,3	5,3,4,8	0,1,1,0	4,3,10,6	0.00102038	0.0464545	0.153	T72vT0 ribosomal depletion, mutant A3B
chr3:49330157-49330157	T	C	-	2,1,2,3	4,8,3,7	1,1,0,1	6,8,6,3	0.00279648	0.0419938	0.16	T72vT0 ribosomal depletion
chr3:49359890-49359890	T	C	-	39,67,78,67	876122513861275	24,43,46,43	1001134813311420	1.24287e-05	0.000286715	0.02	T24vT0, poly-A enrichment
chr3:49383989-49383989	T	C	-	4,0,2,3	8,13,7,11	3,0,0,0	8,6,5,6	0.000726894	0.0148149	0.124	T72vT0 ribosomal depletion
chr3:49477022-49477022	A	G	+	1,6,2,3	11,18,9,14	0,0,0,2	8,7,9,18	5.15835e-05	0.00169946	0.148	T72vT0 ribosomal depletion
chr3:49478412-49478412	A	G	+	2,3,4,3	8,10,7,11	2,1,0,1	12,13,9,7	0.000680888	0.0371934	0.167	T72vT0 ribosomal depletion, mutant A3B
chr3:49771279-49771279	T	C	-	1,5,1,2	6,10,5,9	1,0,0,1	4,4,6,6	0.000467103	0.0104593	0.12	T72vT0 ribosomal depletion
chr3:49773956-49773956	T	C	-	2,3,1,2	10,9,12,9	1,1,0,0	4,3,7,10	0.0027994	0.0420176	0.056	T72vT0 ribosomal depletion
chr3:49777557-49777557	T	C	-	3,4,3,3	10,13,7,12	0,0,1,1	5,9,8,6	3.41127e-05	0.00117881	0.178	T72vT0 ribosomal depletion
chr3:49989742-49989742	A	G	+	9,3,2,8	17,17,12,19	1,1,2,1	13,11,11,20	0.000539005	0.0116957	0.145	T72vT0 ribosomal depletion
chr3:50040907-50040907	A	G	+	1,2,3,3	3,16,11,16	0,0,0,0	3,6,14,8	0.000118227	0.00210265	0.183	T24vT0, poly-A enrichment
chr3:50093091-50093091	A	G	+	2,1,1,5	14,8,4,15	1,0,0,1	5,7,8,8	0.000280699	0.0228335	0.102	T72vT0 ribosomal depletion, mutant A3B
chr3:50175838-50175838	C	T	+	2,14,1,7	6,17,11,23	0,0,0,0	20,15,36,29	4.57342e-11	2.77323e-09	0.255	T24vT0, poly-A enrichment
chr3:50175838-50175838	C	T	+	21,15,17,14	43,30,39,43	0,0,3,9	51,49,46,41	9.75902e-11	9.05579e-09	0.242	T72vT0 ribosomal depletion
chr3:50175838-50175838	C	T	+	9,7,2,2	13,8,5,14	0,0,0,0	20,15,36,29	8.09686e-12	1.87312e-10	0.322	T72vT0, poly-A enrichment
chr3:51654310-51654310	A	G	+	2,5,6,3	19,19,17,23	0,0,1,2	13,7,8,3	0.00209282	0.0336601	0.042	T72vT0 ribosomal depletion
chr3:51980846-51980846	T	C	-	3,3,2,1	7,7,7,11	0,0,0,0	5,6,8,9	2.45833e-05	0.00088438	0.226	T72vT0 ribosomal depletion
chr3:51993816-51993816	G	A	-	91,61,80,69	2123194122561910	0,2,1,6	1781154816491520	0	0	0.034	T72vT0 ribosomal depletion
chr3:51993816-51993816	G	A	-	122137143109	3633366435613240	1,3,1,1	2503307430983000	0	0	0.034	T72vT0, poly-A enrichment
chr3:52386174-52386174	C	T	+	2,0,7,1	7,12,14,17	0,0,0,0	3,18,14,8	7.90297e-05	0.000917745	0.153	T72vT0, poly-A enrichment
chr3:53618267-53618267	C	T	+	0,1,2,4	4,6,3,3	1,1,0,0	5,9,1,4	0.000721386	0.0385333	0.212	T72vT0 ribosomal depletion, mutant A3B
chr3:57687078-57687078	T	C	-	2,4,0,2	13,7,6,8	0,0,0,0	11,10,6,11	0.000631985	0.0132649	0.174	T72vT0 ribosomal depletion
chr3:57775825-57775825	A	G	+	1,5,3,1	6,6,6,2	1,0,1,1	8,8,2,7	0.000135641	0.0150804	0.174	T72vT0 ribosomal depletion, mutant A3B
chr3:58321070-58321070	A	G	+	3,3,5,7	1,1,0,2	4,5,3,5	2,10,6,2	0.000305618	0.00475762	0.308	T24vT0, poly-A enrichment
chr3:65587676-65587676	T	C	-	1,1,2,3	3,3,9,4	0,0,0,1	4,8,14,12	0.000488672	0.0108651	0.258	T72vT0 ribosomal depletion
chr3:65734348-65734348	T	C	-	1,5,2,4	6,13,6,6	1,2,1,0	11,17,9,10	0.000554937	0.0119756	0.196	T72vT0 ribosomal depletion
chr3:69079449-69079449	C	T	-	3,4,0,2	14,18,20,17	1,0,0,0	5,8,5,3	0.001718	0.0207956	0.074	T24vT0, poly-A enrichment
chr3:99823277-99823277	A	G	+	1,4,1,2	6,11,7,11	0,0,1,1	3,9,3,7	0.00187754	0.0309328	0.078	T72vT0 ribosomal depletion
chr3:100728762-100728762	C	T	+	15,8,8,8	384330361380	1,1,0,0	390660535534	2.65919e-05	0.000334591	0.025	T72vT0, poly-A enrichment
chr3:101334050-101334050	T	C	-	0,5,3,1	9,5,5,7	0,1,0,1	5,10,6,8	0.000361214	0.00372367	0.199	T72vT0, poly-A enrichment
chr3:105376065-105376065	C	T	+	4,2,7,5	54,47,64,46	0,0,0,0	37,35,50,30	5.46715e-06	0.000234041	0.077	T72vT0 ribosomal depletion
chr3:105442853-105442853	A	G	+	5,1,3,0	10,5,5,4	0,0,0,1	6,11,5,5	6.43458e-05	0.00204855	0.177	T72vT0 ribosomal depletion
chr3:105442859-105442859	A	G	+	5,0,4,0	11,6,4,4	0,0,0,0	6,11,5,6	0.000152874	0.00414007	0.203	T72vT0 ribosomal depletion
chr3:107809231-107809231	C	T	+	4,1,3,3	19,18,23,37	0,2,0,2	67,54,88,80	0.000253528	0.00271143	0.089	T72vT0, poly-A enrichment
chr3:113512688-113512688	T	C	-	1,1,1,4	4,4,4,5	2,0,0,0	7,6,3,5	0.00105156	0.0196312	0.206	T72vT0 ribosomal depletion
chr3:120332958-120332958	T	C	-	1,1,3,4	3,7,2,2	0,1,2,0	5,11,2,3	0.000939179	0.0179909	0.265	T72vT0 ribosomal depletion
chr3:120602228-120602228	C	T	+	1,0,48,0	13,9,558,8	0,0,0,0	851856757805	0	0	0.038	T72vT0, poly-A enrichment
chr3:123549545-123549545	T	C	-	3,5,0,3	10,7,8,8	0,1,0,0	15,10,5,7	5.55563e-06	0.000236865	0.207	T72vT0 ribosomal depletion
chr3:123592509-123592509	A	G	+	1,2,4,3	22,9,16,23	0,0,0,0	17,13,10,15	0.000142654	0.00392735	0.135	T72vT0 ribosomal depletion
chr3:123953152-123953152	G	A	-	3,4,3,6	14,32,30,35	0,0,0,0	12,37,37,36	3.77002e-07	1.26335e-05	0.131	T24vT0, poly-A enrichment
chr3:123953152-123953152	G	A	-	5,16,8,9	18,33,21,25	0,0,0,0	31,36,33,42	0	0	0.271	T72vT0 ribosomal depletion
chr3:123953152-123953152	G	A	-	5,4,9,5	14,10,26,10	0,0,0,0	12,37,37,36	2.12941e-13	5.53646e-12	0.285	T72vT0, poly-A enrichment
chr3:125363739-125363739	T	C	-	1,3,4,1	2,2,7,7	1,0,0,0	2,9,5,14	1.66768e-05	0.000631637	0.272	T72vT0 ribosomal depletion
chr3:125364382-125364382	T	C	-	3,3,1,2	8,17,20,10	0,0,0,1	9,13,13,11	0.000455368	0.0102915	0.138	T72vT0 ribosomal depletion
chr3:127678940-127678940	A	G	+	1,2,2,2	5,15,7,9	0,0,2,0	5,16,11,5	0.0026808	0.0406435	0.134	T72vT0 ribosomal depletion
chr3:128071406-128071406	A	G	+	53,101,82,113	96191170208	27,68,77,68	98206222236	2.3927e-05	0.000507811	0.108	T24vT0, poly-A enrichment
chr3:128495276-128495276	C	T	+	4,2,2,9	47,58,77,88	0,0,0,0	46,62,55,54	3.96394e-05	0.000808923	0.057	T24vT0, poly-A enrichment
chr3:128495276-128495276	C	T	+	4,7,5,3	35,52,48,42	0,0,0,2	30,30,27,33	1.69261e-05	0.000638395	0.081	T72vT0 ribosomal depletion
chr3:128495276-128495276	C	T	+	7,4,12,8	32,36,39,25	0,0,0,0	46,62,55,54	2.9865e-14	8.08695e-13	0.189	T72vT0, poly-A enrichment
chr3:128497470-128497470	C	T	+	1,0,4,6	19,25,28,22	0,0,0,0	32,22,24,13	0.00014253	0.00392735	0.097	T72vT0 ribosomal depletion
chr3:128734794-128734794	C	T	+	3,4,3,2	16,22,17,5	0,0,0,1	15,10,16,8	1.78176e-05	0.000667631	0.159	T72vT0 ribosomal depletion
chr3:128781570-128781570	A	G	+	1,4,2,3	8,10,4,17	0,1,1,0	10,12,8,13	0.000138504	0.00383315	0.173	T72vT0 ribosomal depletion
chr3:128887563-128887563	A	G	+	2,1,2,5	6,6,3,1	1,0,0,2	6,5,3,4	0.000442497	0.010051	0.287	T72vT0 ribosomal depletion
chr3:129185712-129185712	A	G	+	0,1,4,4	7,19,21,18	0,0,0,2	18,11,10,18	0.00220751	0.0352286	0.073	T72vT0 ribosomal depletion
chr3:129199320-129199320	A	G	+	3,3,1,1	1,1,2,11	0,0,0,3	4,7,3,4	0.0005219	0.00754281	0.372	T24vT0, poly-A enrichment
chr3:129201583-129201583	A	G	+	2,2,6,3	4,24,28,27	0,0,1,0	10,10,27,18	1.81638e-05	0.000400169	0.163	T24vT0, poly-A enrichment
chr3:129269485-129269485	A	G	+	5,0,5,4	25,24,27,27	0,0,0,1	14,22,19,23	1.44503e-05	0.000558027	0.103	T72vT0 ribosomal depletion
chr3:129720992-129720992	T	C	-	1,2,2,2	3,5,6,11	0,0,0,1	5,4,6,4	0.00016306	0.0167133	0.185	T72vT0 ribosomal depletion, mutant A3B
chr3:130720912-130720912	T	C	-	2,1,0,5	4,3,5,7	1,0,0,0	7,6,3,4	0.000167817	0.00448316	0.219	T72vT0 ribosomal depletion
chr3:132422271-132422271	A	G	+	0,3,4,4	12,6,9,16	0,0,2,1	10,9,12,19	0.000208818	0.00539574	0.162	T72vT0 ribosomal depletion
chr3:133587639-133587639	C	T	+	20,31,44,28	158266214226	0,0,0,2	185273285313	0	0	0.123	T24vT0, poly-A enrichment
chr3:133587639-133587639	C	T	+	17,43,34,29	38,62,54,49	0,0,0,0	38,81,67,40	0	0	0.369	T72vT0 ribosomal depletion
chr3:133587639-133587639	C	T	+	38,31,32,36	56,58,66,59	0,0,0,2	185273285313	0	0	0.363	T72vT0, poly-A enrichment
chr3:136169934-136169934	T	C	-	2,1,5,1	20,8,13,7	1,0,0,1	15,18,17,7	0.000650305	0.0135606	0.104	T72vT0 ribosomal depletion
chr3:136185235-136185235	T	C	-	3,1,1,3	12,4,5,7	0,0,0,1	7,5,5,11	3.99692e-05	0.00816296	0.196	T72vT0 ribosomal depletion, mutant A3B
chr3:136669408-136669408	T	C	-	0,1,3,4	10,11,13,20	0,0,0,0	13,13,17,11	0.00281925	0.0422954	0.109	T72vT0 ribosomal depletion
chr3:136709178-136709178	T	C	-	4,3,5,0	5,12,4,15	2,0,1,0	11,11,9,6	0.00024996	0.00621944	0.237	T72vT0 ribosomal depletion
chr3:138721437-138721437	T	C	-	0,4,1,3	4,8,6,6	0,0,1,0	8,6,6,9	0.000254062	0.00629667	0.167	T72vT0 ribosomal depletion
chr3:138790441-138790441	T	C	-	4,1,3,4	18,17,22,15	0,0,0,0	10,9,9,14	6.27468e-06	0.000265726	0.142	T72vT0 ribosomal depletion
chr3:138810980-138810980	T	C	-	1,2,3,5	10,10,12,6	0,0,1,0	7,3,4,5	4.23101e-06	0.000189077	0.178	T72vT0 ribosomal depletion
chr3:138811196-138811196	T	C	-	6,2,4,5	10,16,8,13	0,0,0,0	4,10,3,9	8.7989e-09	6.22433e-07	0.274	T72vT0 ribosomal depletion
chr3:140963755-140963755	C	T	+	3,3,3,3	5,24,16,16	0,0,0,0	3,14,25,13	1.6726e-06	4.85285e-05	0.2	T24vT0, poly-A enrichment
chr3:141430319-141430319	A	G	+	4,4,4,2	10,6,9,10	0,2,1,1	10,10,9,4	0.00112714	0.0206511	0.173	T72vT0 ribosomal depletion
chr3:141896118-141896118	A	G	+	3,1,1,5	5,4,9,8	0,1,2,0	9,7,7,14	0.000405681	0.0093905	0.178	T72vT0 ribosomal depletion
chr3:141919307-141919307	A	G	+	3,2,1,6	7,9,7,15	0,0,0,1	7,12,6,11	1.97564e-06	9.53079e-05	0.202	T72vT0 ribosomal depletion
chr3:142194167-142194167	T	C	-	2,2,3,1	4,4,7,5	1,0,2,0	4,8,6,1	0.00298438	0.0440811	0.171	T72vT0 ribosomal depletion
chr3:142203518-142203518	T	C	-	6,2,2,3	6,3,1,1	0,1,2,1	4,9,5,4	8.06148e-05	0.00246275	0.433	T72vT0 ribosomal depletion
chr3:142332009-142332009	T	C	-	1,2,2,1	6,9,9,8	0,0,0,1	5,11,8,10	0.00190193	0.0312857	0.132	T72vT0 ribosomal depletion
chr3:142612629-142612629	A	G	+	7,0,2,5	9,5,6,5	1,1,1,1	6,15,12,9	0.000973435	0.01849	0.201	T72vT0 ribosomal depletion
chr3:143051453-143051453	C	T	+	4,1,3,3	9,6,11,10	0,0,0,0	5,8,10,14	6.16231e-07	3.2786e-05	0.224	T72vT0 ribosomal depletion
chr3:144003070-144003070	A	G	+	0,3,4,2	9,10,9,9	2,0,0,0	6,4,6,6	0.00106307	0.0197641	0.118	T72vT0 ribosomal depletion
chr3:149067617-149067617	T	C	-	12,14,15,14	12,18,20,25	4,7,4,10	22,21,26,24	0.000517545	0.0113197	0.223	T72vT0 ribosomal depletion
chr3:149067617-149067617	T	C	-	7,3,2,9	6,4,2,4	2,5,1,1	4,6,6,15	0.00242338	0.0209101	0.292	T72vT0, poly-A enrichment
chr3:149140104-149140104	C	T	+	4,3,5,4	52,94,105,107	0,0,0,0	62108108101	0.000646655	0.00898963	0.046	T24vT0, poly-A enrichment
chr3:149286159-149286159	C	T	+	11,11,7,2	293236238292	0,0,0,0	74121103125	0.000326184	0.0034165	0.029	T72vT0, poly-A enrichment
chr3:150586131-150586131	T	C	-	2,1,3,2	7,7,5,4	0,0,0,2	5,7,5,1	0.00287194	0.0428414	0.097	T72vT0 ribosomal depletion
chr3:150704189-150704189	T	C	+	1,5,1,1	6,9,14,10	0,0,1,0	3,9,13,10	0.000936297	0.0122663	0.147	T24vT0, poly-A enrichment
chr3:157145246-157145246	T	C	-	3,2,3,3	25,26,19,29	0,0,0,0	39,12,18,22	0.000113377	0.0032313	0.102	T72vT0 ribosomal depletion
chr3:158692071-158692071	C	T	+	1,4,4,4	42,37,65,69	0,2,0,0	152164231203	0.000656077	0.00643591	0.055	T72vT0, poly-A enrichment
chr3:160392955-160392955	T	C	-	3,2,0,2	8,6,7,3	0,0,1,0	4,9,14,3	0.000626012	0.0354701	0.214	T72vT0 ribosomal depletion, mutant A3B
chr3:160434383-160434383	C	T	+	43,31,34,45	312498553492	0,0,0,0	394624760723	0	0	0.08	T24vT0, poly-A enrichment
chr3:160434383-160434383	C	T	+	3,11,11,6	9,26,21,11	0,0,0,0	45,67,45,27	0	0	0.311	T72vT0 ribosomal depletion
chr3:160434383-160434383	C	T	+	32,24,43,39	70,66,130,113	0,0,0,0	394624760723	0	0	0.271	T72vT0, poly-A enrichment
chr3:169611375-169611375	G	A	-	5,7,4,4	20,18,27,27	0,0,0,2	21,39,35,31	2.88812e-08	1.86722e-06	0.169	T72vT0 ribosomal depletion
chr3:169992885-169992885	C	T	+	16,22,20,26	726884783858	0,0,0,0	1129838813761	9.58143e-10	1.9281e-08	0.025	T72vT0, poly-A enrichment
chr3:170051957-170051957	A	G	+	3,1,2,2	7,5,4,8	0,1,0,1	2,7,9,7	0.00043345	0.00988104	0.188	T72vT0 ribosomal depletion
chr3:172816736-172816736	C	T	+	6,9,7,10	86111142125	0,0,0,0	514881762822	1.84019e-12	1.27353e-10	0.065	T24vT0, poly-A enrichment
chr3:172816736-172816736	C	T	+	10,18,12,20	50,58,68,49	0,0,0,0	262380319299	0	0	0.211	T72vT0 ribosomal depletion
chr3:172821183-172821183	C	T	+	3,3,3,3	21,65,78,31	0,0,0,0	23,59,188,77	0.00154396	0.0189776	0.074	T24vT0, poly-A enrichment
chr3:172821183-172821183	C	T	+	5,5,5,7	31,31,34,33	0,0,0,0	23,59,188,77	6.26854e-12	1.46749e-10	0.145	T72vT0, poly-A enrichment
chr3:174441438-174441438	A	G	+	1,2,7,2	18,13,36,15	1,1,1,0	56,33,34,37	6.31414e-05	0.00202059	0.098	T72vT0 ribosomal depletion
chr3:179397623-179397623	T	C	-	15,31,45,28	206277307256	18,29,28,20	279352338412	0.00199034	0.0235111	0.034	T24vT0, poly-A enrichment
chr3:179397623-179397623	T	C	-	15,11,22,28	150108203204	18,29,28,20	279352338412	0.00646378	0.0472991	0.036	T72vT0, poly-A enrichment
chr3:179598207-179598207	T	C	-	2,2,1,3	10,16,5,18	1,1,0,0	5,6,10,10	0.00209301	0.0336601	0.069	T72vT0 ribosomal depletion
chr3:180976609-180976609	C	T	+	3,3,3,3	12,16,24,17	0,0,0,1	22,15,29,18	1.00841e-05	0.000239572	0.142	T24vT0, poly-A enrichment
chr3:183037304-183037304	G	A	-	9,7,6,10	373293242315	0,0,0,0	355316322345	0.000317877	0.00767919	0.025	T72vT0 ribosomal depletion
chr3:183037304-183037304	G	A	-	9,9,11,6	473389417402	2,1,0,0	598661625631	0.00451167	0.0357768	0.019	T72vT0, poly-A enrichment
chr3:183071043-183071043	G	A	-	1,1,10,0	15,15,188,15	2,0,0,0	241285284237	0.00569549	0.0427963	0.042	T72vT0, poly-A enrichment
chr3:183417953-183417953	T	C	-	4,2,2,5	13,7,12,7	1,1,1,0	2,4,7,9	0.00101763	0.0191564	0.09	T72vT0 ribosomal depletion
chr3:183637663-183637663	A	G	+	4,0,6,7	0,1,1,1	2,3,2,8	3,5,6,3	0.000312202	0.00482473	0.245	T24vT0, poly-A enrichment
chr3:183818215-183818215	G	A	-	3,6,4,1	33,72,66,73	0,0,0,0	39,94,94,87	0.000368732	0.00555016	0.058	T24vT0, poly-A enrichment
chr3:183818215-183818215	G	A	-	25,34,22,36	78,94,87,70	0,0,0,0	75,69,64,83	0	0	0.262	T72vT0 ribosomal depletion
chr3:183818215-183818215	G	A	-	35,29,37,41	95,101,91,108	0,0,0,0	39,94,94,87	0	0	0.264	T72vT0, poly-A enrichment
chr3:184184371-184184371	A	G	+	3,4,2,3	15,23,12,23	1,0,1,2	12,24,24,16	0.00249005	0.0383411	0.086	T72vT0 ribosomal depletion
chr3:184198007-184198007	A	G	+	0,5,4,3	6,7,11,4	1,0,1,1	4,5,13,2	0.000137493	0.0150804	0.127	T72vT0 ribosomal depletion, mutant A3B
chr3:184897024-184897024	C	T	+	7,10,11,5	27,49,46,27	0,0,0,0	4,8,7,10	7.4264e-08	4.59402e-06	0.181	T72vT0 ribosomal depletion
chr3:184907145-184907145	C	T	+	10,6,10,7	116105122104	0,0,0,0	21,13,20,29	6.38494e-06	0.000268168	0.068	T72vT0 ribosomal depletion
chr3:184911703-184911703	C	T	+	30,38,40,31	185193207177	0,0,0,0	36,39,42,53	1.44329e-15	1.96275e-13	0.154	T72vT0 ribosomal depletion
chr3:184912697-184912697	C	T	+	9,7,6,5	45,63,51,60	0,0,0,0	9,13,7,4	3.14231e-06	0.000144941	0.112	T72vT0 ribosomal depletion
chr3:184912839-184912839	C	T	+	12,17,14,14	161167166183	0,0,1,0	22,35,39,33	4.77227e-07	2.60493e-05	0.071	T72vT0 ribosomal depletion
chr3:184915373-184915373	C	T	+	5,1,2,3	10,27,15,17	0,0,0,0	128121105104	1.40828e-05	0.000545168	0.159	T72vT0 ribosomal depletion
chr3:184927396-184927396	C	T	+	9,11,11,11	64,79,73,61	0,0,0,0	13,18,15,16	3.04105e-08	1.95807e-06	0.132	T72vT0 ribosomal depletion
chr3:184927849-184927849	C	T	+	7,13,13,12	19,33,33,24	0,0,0,0	5,9,8,4	6.90097e-10	5.79936e-08	0.292	T72vT0 ribosomal depletion
chr3:184930084-184930084	C	T	+	17,15,16,16	85,69,80,69	0,0,0,1	14,17,14,11	1.44973e-08	9.9217e-07	0.154	T72vT0 ribosomal depletion
chr3:184931074-184931074	C	T	+	3,8,8,4	15,43,60,28	0,0,0,0	3,11,7,11	1.03559e-06	5.29546e-05	0.142	T72vT0 ribosomal depletion
chr3:184943062-184943062	C	T	+	5,6,6,5	45,48,48,43	0,0,0,0	8,9,7,9	5.54952e-06	0.000236865	0.107	T72vT0 ribosomal depletion
chr3:184952457-184952457	C	T	+	7,9,10,8	22,23,13,12	0,0,0,0	9,7,7,4	3.46145e-10	2.99202e-08	0.339	T72vT0 ribosomal depletion
chr3:184985776-184985776	C	T	+	3,6,4,3	20,44,22,19	0,0,0,0	9,7,6,12	3.0549e-06	0.000141323	0.135	T72vT0 ribosomal depletion
chr3:185028523-185028523	C	T	+	5,7,6,5	36,38,39,34	0,0,0,0	13,8,20,10	2.84202e-07	1.62438e-05	0.135	T72vT0 ribosomal depletion
chr3:185033290-185033290	C	T	+	10,14,12,6	19,24,21,13	0,0,0,0	3,8,6,6	1.76916e-10	1.58122e-08	0.348	T72vT0 ribosomal depletion
chr3:185049891-185049891	C	T	+	2,3,3,3	1,5,10,11	0,0,0,0	10,3,2,8	1.7161e-07	6.13844e-06	0.372	T24vT0, poly-A enrichment
chr3:185049891-185049891	C	T	+	5,4,4,3	40,34,37,49	0,0,0,0	18,21,16,15	1.90923e-05	0.000708659	0.093	T72vT0 ribosomal depletion
chr3:185386545-185386545	A	G	+	1,1,5,2	3,17,14,12	0,0,0,2	11,9,9,15	0.000276364	0.0228232	0.148	T72vT0 ribosomal depletion, mutant A3B
chr3:185543697-185543697	T	C	-	3,5,1,2	17,20,16,16	0,0,1,0	7,9,6,9	0.000170149	0.0045263	0.094	T72vT0 ribosomal depletion
chr3:185545694-185545694	T	C	-	2,1,1,4	17,20,8,12	0,0,0,0	9,11,6,12	0.00305464	0.044825	0.128	T72vT0 ribosomal depletion
chr3:185593312-185593312	A	G	+	10,12,5,10	37,43,35,41	3,3,3,6	39,38,31,44	0.00265362	0.0403604	0.1	T72vT0 ribosomal depletion
chr3:185606376-185606376	C	T	+	12,9,7,12	197206205255	0,0,0,1	187280231262	2.60736e-09	5.02324e-08	0.043	T72vT0, poly-A enrichment
chr3:186783605-186783605	C	T	+	5,9,11,7	20,20,13,24	0,0,0,0	242232231247	0	0	0.299	T72vT0 ribosomal depletion
chr3:186783605-186783605	C	T	+	7,2,116,10	13,14,292,11	0,0,0,0	372511531532	0	0	0.309	T72vT0, poly-A enrichment
chr3:186791790-186791790	G	A	-	2,6,77,7	37,46,429,73	0,0,0,0	876878725798	0	0	0.102	T72vT0, poly-A enrichment
chr3:186795040-186795040	T	C	-	0,3,5,0	6,2,10,11	0,0,2,0	7,10,14,13	0.00492877	0.0383596	0.202	T72vT0, poly-A enrichment
chr3:188623532-188623532	A	G	+	0,3,5,7	1,4,8,5	0,2,0,0	9,8,10,4	1.15049e-06	5.8357e-05	0.299	T72vT0 ribosomal depletion
chr3:190307264-190307264	G	A	-	19,48,54,42	543694833713	2,0,2,2	7069439671097	0	0	0.052	T24vT0, poly-A enrichment
chr3:190307264-190307264	G	A	-	2,8,6,6	34,100,70,36	0,0,0,1	158269219158	9.07748e-10	7.40038e-08	0.086	T72vT0 ribosomal depletion
chr3:190307264-190307264	G	A	-	14,15,22,12	115132152166	2,0,2,2	7069439671097	0	0	0.099	T72vT0, poly-A enrichment
chr3:190319029-190319029	G	A	-	9,6,9,8	159147160150	1,0,0,0	318339292318	1.7001e-09	1.33761e-07	0.048	T72vT0 ribosomal depletion
chr3:192871126-192871126	G	A	-	3,2,2,3	23,31,30,34	0,0,0,0	8,24,16,29	0.001383	0.0244298	0.08	T72vT0 ribosomal depletion
chr3:192894029-192894029	T	C	-	8,5,8,9	114,104,106,97	0,3,0,2	43,39,50,72	0.00039267	0.00916052	0.042	T72vT0 ribosomal depletion
chr3:192915102-192915102	G	A	-	30,20,28,24	116,101,94,99	0,0,0,0	55,60,51,77	0	0	0.199	T72vT0 ribosomal depletion
chr3:194437166-194437166	G	A	-	7,13,10,10	484480523446	0,2,0,7	499534449501	0.00234115	0.0366385	0.016	T72vT0 ribosomal depletion
chr3:194462201-194462201	G	A	-	1,0,23,0	26,7,355,10	0,0,0,0	239436406400	1.35204e-07	2.20071e-06	0.024	T72vT0, poly-A enrichment
chr3:194510631-194510631	A	G	+	2,2,0,4	5,4,2,1	2,0,1,0	5,5,4,3	0.000554321	0.00791336	0.233	T24vT0, poly-A enrichment
chr3:194510631-194510631	A	G	+	4,7,0,1	5,4,2,7	2,0,1,0	5,5,4,3	0.000904442	0.00861346	0.18	T72vT0, poly-A enrichment
chr3:194619390-194619390	T	C	-	29,27,40,29	113,86,108,108	1,3,5,9	31,26,35,55	9.25998e-05	0.00273807	0.131	T72vT0 ribosomal depletion
chr3:195248207-195248207	T	C	-	3,6,5,3	13,16,11,17	0,1,1,0	9,11,4,5	1.87014e-05	0.000694971	0.16	T72vT0 ribosomal depletion
chr3:195326543-195326543	G	A	-	4,3,3,3	19,18,11,24	0,0,0,1	15,26,24,18	4.92825e-06	0.000215355	0.147	T72vT0 ribosomal depletion
chr3:195413566-195413566	T	C	-	2,3,5,4	30,18,21,24	1,1,0,2	26,21,21,18	0.000654459	0.0366269	0.09	T72vT0 ribosomal depletion, mutant A3B
chr3:195527806-195527806	T	C	-	2,2,10,2	17,26,21,32	0,2,0,2	16,13,15,11	0.00349975	0.0498497	0.068	T72vT0 ribosomal depletion
chr3:195891893-195891893	G	A	-	3,3,3,3	17,33,55,43	0,0,0,0	13,40,46,41	0.000244431	0.00394769	0.088	T24vT0, poly-A enrichment
chr3:195891893-195891893	G	A	-	11,13,17,13	88,96,104,97	0,0,0,0	84,89,71,63	2.9976e-15	3.92425e-13	0.122	T72vT0 ribosomal depletion
chr3:195891893-195891893	G	A	-	3,3,3,4	27,33,29,31	0,0,0,0	13,40,46,41	1.58805e-05	0.000207365	0.098	T72vT0, poly-A enrichment
chr3:195901574-195901574	T	C	-	3,5,2,5	61,79,72,83	0,2,0,0	49,44,53,51	0.0016589	0.0282757	0.037	T72vT0 ribosomal depletion
chr3:196052134-196052134	G	A	-	191148170113	794541726514	1,0,1,0	3533290829532860	0	0	0.195	T72vT0 ribosomal depletion
chr3:196052134-196052134	G	A	-	116,117,271,95	9459801831867	0,2,2,1	4020501645644620	0	0	0.111	T72vT0, poly-A enrichment
chr3:196291679-196291679	T	C	-	1,6,4,2	35,38,46,30	0,2,0,0	11,16,27,33	0.00093899	0.0122763	0.049	T24vT0, poly-A enrichment
chr3:196291679-196291679	T	C	-	7,2,2,1	21,19,24,20	0,2,0,0	11,16,27,33	0.000154531	0.00172628	0.09	T72vT0, poly-A enrichment
chr3:196314818-196314818	T	C	-	7,6,2,3	26,34,21,23	0,5,1,0	21,27,31,32	0.00184321	0.0305862	0.094	T72vT0 ribosomal depletion
chr3:196354561-196354561	G	A	-	10,14,17,13	123144139118	0,0,0,0	116145155114	5.55112e-16	7.74945e-14	0.093	T72vT0 ribosomal depletion
chr3:196354561-196354561	G	A	-	10,9,9,6	100,116,81,107	0,0,0,0	77174142141	1.52404e-11	3.48453e-10	0.079	T72vT0, poly-A enrichment
chr3:196773804-196773804	A	G	+	2,0,3,5	10,11,8,9	0,0,0,2	14,6,15,9	4.31143e-06	0.0021182	0.154	T72vT0 ribosomal depletion, mutant A3B
chr3:196908090-196908090	A	G	+	7,2,0,5	60,69,86,65	0,2,0,0	73,57,61,56	0.000762655	0.0396729	0.043	T72vT0 ribosomal depletion, mutant A3B
chr3:196910620-196910620	A	G	+	7,1,3,2	12,6,9,6	1,0,2,0	5,13,10,8	9.27246e-05	0.00106624	0.169	T72vT0, poly-A enrichment
chr3:196918576-196918576	C	T	+	3,3,3,3	17,4,5,9	0,0,0,0	12,7,10,13	8.78315e-08	3.34864e-06	0.301	T24vT0, poly-A enrichment
chr3:196940359-196940359	T	C	-	5,5,0,3	3,5,6,9	0,0,2,1	3,12,2,6	0.000734651	0.0149344	0.183	T72vT0 ribosomal depletion
chr3:196940359-196940359	T	C	-	2,6,5,5	2,6,9,4	0,6,11,6	13,19,37,30	0.00255517	0.0218547	0.319	T72vT0, poly-A enrichment
chr3:197043836-197043836	G	A	-	14,14,12,5	389457460459	0,1,0,0	507590567591	1.33236e-05	0.000305148	0.025	T24vT0, poly-A enrichment
chr3:197043836-197043836	G	A	-	3,6,4,6	21,39,33,36	0,0,0,0	52,80,38,43	5.07742e-09	3.75158e-07	0.127	T72vT0 ribosomal depletion
chr3:197043836-197043836	G	A	-	24,26,26,26	198175218245	0,1,0,0	507590567591	0	0	0.11	T72vT0, poly-A enrichment
chr3:197126231-197126231	T	C	-	0,3,1,5	3,2,4,10	0,0,1,2	16,5,8,9	0.00024123	0.00259135	0.21	T72vT0, poly-A enrichment
chr3:197262044-197262044	G	A	-	3,7,10,6	40,49,56,41	0,0,0,0	50,57,54,66	1.41666e-10	1.28435e-08	0.118	T72vT0 ribosomal depletion
chr3:197512159-197512159	G	A	-	8,6,4,4	200146180191	0,0,0,0	225182203200	0.00126221	0.0226781	0.03	T72vT0 ribosomal depletion
chr3:197512159-197512159	G	A	-	13,5,9,2	255294270278	0,0,0,0	238384369419	0.000646632	0.00635386	0.026	T72vT0, poly-A enrichment
chr3:197672098-197672098	G	A	-	11,9,1,2	140144136133	0,0,0,0	148132153146	2.84145e-05	0.000596196	0.038	T24vT0, poly-A enrichment
chr3:197672098-197672098	G	A	-	8,6,9,6	119,110,95,112	0,0,0,2	134111123115	5.11748e-08	3.2356e-06	0.059	T72vT0 ribosomal depletion
chr3:197672098-197672098	G	A	-	10,8,9,8	96,66,109,81	0,0,0,0	148132153146	1.90958e-13	4.98698e-12	0.092	T72vT0, poly-A enrichment
chr3:197874316-197874316	A	G	+	2,3,4,2	30,43,48,42	0,0,2,0	20,38,33,30	0.00383273	0.0309782	0.048	T72vT0, poly-A enrichment
chr3:197884177-197884177	A	G	+	9,16,9,10	30,34,29,20	4,19,12,11	31,79,68,83	0.00229614	0.0199292	0.136	T72vT0, poly-A enrichment
chr3:197941761-197941761	T	C	-	7,3,3,11	13,22,26,26	0,1,0,4	15,21,26,29	3.4752e-05	0.00071607	0.176	T24vT0, poly-A enrichment
chr3:197941789-197941789	T	C	-	4,2,2,4	12,23,22,29	0,0,1,0	7,21,19,28	4.33991e-05	0.000868937	0.121	T24vT0, poly-A enrichment
chr4:64280-64280	A	G	+	4,6,2,3	51,64,44,53	0,0,1,1	39,48,54,53	0.000218536	0.0055889	0.055	T72vT0 ribosomal depletion
chr4:64280-64280	A	G	+	2,0,4,2	12,4,17,14	0,1,1,0	18,38,47,45	0.00136362	0.0124227	0.103	T72vT0, poly-A enrichment
chr4:351257-351257	A	G	+	2,2,0,6	3,7,3,3	3,0,0,0	8,6,1,4	0.000581061	0.0123784	0.254	T72vT0 ribosomal depletion
chr4:672467-672467	G	A	-	27,21,22,17	292146179176	1,0,3,1	267199207183	0	0	0.096	T24vT0, poly-A enrichment
chr4:672467-672467	G	A	-	40,35,28,36	112144124134	1,0,3,1	267199207183	0	0	0.208	T72vT0, poly-A enrichment
chr4:778631-778631	T	C	-	3,3,3,4	28,38,31,23	1,1,0,4	25,59,48,48	0.00626362	0.0461216	0.069	T72vT0, poly-A enrichment
chr4:781390-781390	T	C	-	0,5,4,3	13,42,46,48	0,0,1,0	11,28,35,31	0.000653984	0.00905088	0.054	T24vT0, poly-A enrichment
chr4:781390-781390	T	C	-	16,14,18,11	111,88,116,108	9,1,7,9	167128142140	1.68163e-06	8.23842e-05	0.081	T72vT0 ribosomal depletion
chr4:781390-781390	T	C	-	5,3,4,4	21,20,19,29	0,0,1,0	11,28,35,31	4.3291e-07	6.71181e-06	0.148	T72vT0, poly-A enrichment
chr4:868868-868868	G	A	-	0,1,5,2	4,2,4,3	0,0,0,0	5,14,8,21	5.67055e-05	0.000673134	0.322	T72vT0, poly-A enrichment
chr4:998261-998261	A	G	+	3,2,4,4	11,33,40,34	0,3,0,1	13,30,45,41	0.00159218	0.0193832	0.088	T24vT0, poly-A enrichment
chr4:1229934-1229934	T	C	-	1,3,2,3	7,6,5,6	1,0,0,0	3,8,9,9	2.50298e-05	0.000316973	0.207	T72vT0, poly-A enrichment
chr4:1231545-1231545	T	C	-	0,4,1,4	5,29,26,27	0,0,0,0	2,4,6,9	0.00252997	0.0291179	0.072	T24vT0, poly-A enrichment
chr4:1324055-1324055	C	T	+	5,1,1,1	17,15,17,15	0,0,0,0	14,11,28,28	0.00528831	0.0403057	0.102	T72vT0, poly-A enrichment
chr4:1371318-1371318	C	T	+	2,5,3,5	5,9,11,13	0,0,0,0	14,13,25,19	8.69302e-10	4.61237e-08	0.284	T24vT0, poly-A enrichment
chr4:1371318-1371318	C	T	+	5,3,6,4	15,15,13,21	0,0,0,2	32,20,29,24	2.32025e-08	1.53146e-06	0.204	T72vT0 ribosomal depletion
chr4:1371456-1371456	C	T	+	3,2,10,7	4,13,18,11	0,0,0,0	8,15,22,23	2.36668e-11	1.47732e-09	0.327	T24vT0, poly-A enrichment
chr4:1371456-1371456	C	T	+	2,2,7,3	21,20,20,26	0,0,0,4	29,35,30,32	0.000119251	0.00337129	0.107	T72vT0 ribosomal depletion
chr4:1371456-1371456	C	T	+	3,5,1,1	7,8,9,17	0,0,0,0	8,15,22,23	1.07777e-05	0.000142957	0.21	T72vT0, poly-A enrichment
chr4:1807425-1807425	C	T	+	3,3,3,3	14,32,24,19	0,0,0,0	17,29,28,25	1.33775e-05	0.000176247	0.127	T72vT0, poly-A enrichment
chr4:2490967-2490967	A	G	+	3,1,2,2	5,5,5,7	0,1,2,0	5,6,6,11	0.000854423	0.04183	0.164	T72vT0 ribosomal depletion, mutant A3B
chr4:2520306-2520306	A	G	+	3,1,4,2	7,7,9,1	0,0,0,0	10,13,3,14	1.45008e-06	7.20473e-05	0.35	T72vT0 ribosomal depletion
chr4:2550211-2550211	A	G	+	2,6,0,5	30,25,20,26	1,0,0,0	17,16,24,28	2.83379e-05	0.00100119	0.09	T72vT0 ribosomal depletion
chr4:2562432-2562432	A	G	+	6,6,1,4	50,42,42,48	0,0,0,2	40,27,44,54	2.40447e-05	0.000869966	0.074	T72vT0 ribosomal depletion
chr4:2576442-2576442	A	G	+	4,1,3,1	23,19,14,12	0,0,0,0	16,11,6,23	0.000592158	0.0125809	0.113	T72vT0 ribosomal depletion
chr4:2586677-2586677	A	G	+	5,1,2,4	9,9,7,4	0,1,1,2	8,6,9,9	0.00187538	0.0309296	0.189	T72vT0 ribosomal depletion
chr4:2705840-2705840	A	G	+	7,11,7,11	7,8,1,7	4,1,3,6	8,5,12,7	0.00289573	0.0431326	0.351	T72vT0 ribosomal depletion
chr4:2857379-2857379	A	G	+	3,1,3,0	4,2,7,3	1,1,0,0	5,5,6,2	0.00054637	0.033258	0.182	T72vT0 ribosomal depletion, mutant A3B
chr4:3084305-3084305	A	G	+	8,0,3,2	36,9,19,18	2,0,1,1	20,30,14,29	0.000618236	0.0353235	0.057	T72vT0 ribosomal depletion, mutant A3B
chr4:3265822-3265822	A	G	+	4,6,4,1	15,17,9,15	2,0,0,1	7,5,4,8	0.000746105	0.0151089	0.127	T72vT0 ribosomal depletion
chr4:6460427-6460427	T	C	-	5,1,2,3	9,7,4,8	0,0,0,0	3,6,7,9	1.15532e-07	6.92969e-06	0.272	T72vT0 ribosomal depletion
chr4:6639477-6639477	T	C	-	4,2,2,3	5,17,9,14	1,0,0,0	7,7,11,12	4.29269e-06	0.000191291	0.196	T72vT0 ribosomal depletion
chr4:17626690-17626690	A	G	+	6,4,5,5	44,37,41,33	0,2,2,1	54,49,43,42	3.78038e-05	0.00128663	0.088	T72vT0 ribosomal depletion
chr4:17988042-17988042	T	C	-	1,4,1,2	6,8,5,12	0,0,0,0	6,10,9,5	0.000222658	0.00567055	0.196	T72vT0 ribosomal depletion
chr4:37536048-37536048	C	T	+	6,4,6,6	34,31,40,42	0,0,0,0	48,54,54,54	8.31211e-10	6.8651e-08	0.13	T72vT0 ribosomal depletion
chr4:37595665-37595665	C	T	+	3,2,2,2	11,16,33,28	0,0,0,0	45,78,62,72	0.00266943	0.0303906	0.112	T24vT0, poly-A enrichment
chr4:39705724-39705724	A	G	+	15,12,12,9	42,53,30,38	2,3,6,8	45,32,45,43	0.000580423	0.0123732	0.131	T72vT0 ribosomal depletion
chr4:39717113-39717113	A	G	+	5,3,4,7	39,22,23,24	3,1,0,1	22,30,24,28	0.000442997	0.0100551	0.105	T72vT0 ribosomal depletion
chr4:39831974-39831974	T	C	-	3,4,1,2	5,8,10,6	0,3,0,0	1,6,7,5	0.00242576	0.0376082	0.179	T72vT0 ribosomal depletion
chr4:39896318-39896318	T	C	-	2,1,2,3	8,17,8,6	0,0,1,0	7,3,15,10	0.000692917	0.0142793	0.182	T72vT0 ribosomal depletion
chr4:40495494-40495494	T	C	-	1,2,3,2	10,14,6,9	0,1,0,1	8,10,14,5	0.00171689	0.0289823	0.118	T72vT0 ribosomal depletion
chr4:40626962-40626962	G	A	-	3,4,4,3	21,21,15,16	0,0,0,0	19,17,17,28	4.69881e-07	2.56928e-05	0.163	T72vT0 ribosomal depletion
chr4:40941255-40941255	G	A	-	3,3,2,3	3,3,9,6	0,0,0,0	4,12,24,18	8.20618e-09	3.70558e-07	0.379	T24vT0, poly-A enrichment
chr4:40941255-40941255	G	A	-	2,2,1,3	7,6,6,6	0,0,1,0	13,9,15,17	8.53395e-05	0.00255615	0.221	T72vT0 ribosomal depletion
chr4:41367161-41367161	A	G	+	5,1,2,1	6,9,7,6	0,0,1,2	6,6,4,12	0.000881339	0.0427494	0.144	T72vT0 ribosomal depletion, mutant A3B
chr4:48835670-48835670	A	G	+	5,8,10,10	21,22,17,20	4,2,3,2	13,20,21,18	0.00321816	0.0466404	0.153	T72vT0 ribosomal depletion
chr4:55525363-55525363	T	C	-	6,7,2,5	6,3,6,3	2,5,0,1	11,8,6,10	0.000489732	0.0308552	0.361	T72vT0 ribosomal depletion, mutant A3B
chr4:56474802-56474802	A	G	+	3,1,6,0	10,7,15,10	0,0,0,1	4,17,11,9	5.9965e-05	0.00193445	0.135	T72vT0 ribosomal depletion
chr4:67509002-67509002	C	T	-	4,3,2,4	57,67,56,50	1,1,0,1	41,57,38,62	0.00352065	0.0379289	0.04	T24vT0, poly-A enrichment
chr4:73129523-73129523	T	C	-	1,1,2,3	9,8,5,8	0,0,0,0	10,8,5,7	0.00320008	0.0464837	0.192	T72vT0 ribosomal depletion
chr4:73129704-73129704	T	C	-	2,4,4,4	3,5,7,4	1,0,1,2	5,7,7,4	0.000138964	0.0151103	0.271	T72vT0 ribosomal depletion, mutant A3B
chr4:73148932-73148932	G	A	-	24,29,26,23	63124100135	0,0,0,1	80162114145	0	0	0.203	T24vT0, poly-A enrichment
chr4:73148932-73148932	G	A	-	36,18,34,27	98128120111	1,0,1,16	180136155135	0	0	0.173	T72vT0 ribosomal depletion
chr4:73148932-73148932	G	A	-	25,22,28,26	60,79,65,78	0,0,0,1	80162114145	0	0	0.264	T72vT0, poly-A enrichment
chr4:76614074-76614074	A	G	+	2,1,2,3	10,15,17,15	0,0,0,0	4,5,14,8	0.00218967	0.0349616	0.125	T72vT0 ribosomal depletion
chr4:86995203-86995203	A	G	+	5,7,1,1	23,14,13,11	1,1,0,0	10,7,9,12	4.80103e-05	0.00159613	0.113	T72vT0 ribosomal depletion
chr4:88283206-88283206	T	C	-	3,2,0,3	20,11,15,11	1,0,0,0	18,8,9,14	0.000977185	0.0452498	0.111	T72vT0 ribosomal depletion, mutant A3B
chr4:98886511-98886511	T	C	-	3,4,0,6	14,17,17,16	0,0,0,2	7,4,17,22	5.41539e-05	0.00177052	0.139	T72vT0 ribosomal depletion
chr4:108002018-108002018	A	G	+	7,4,2,3	4,3,2,1	2,1,0,1	5,5,2,4	5.89049e-05	0.00190415	0.451	T72vT0 ribosomal depletion
chr4:115633450-115633450	C	T	+	6,5,4,5	12,17,13,17	0,0,0,0	7,5,8,4	1.50515e-08	1.02344e-06	0.256	T72vT0 ribosomal depletion
chr4:115752629-115752629	C	T	+	4,2,3,3	28,39,42,46	0,0,0,1	37,63,75,61	0.000326353	0.00500022	0.071	T24vT0, poly-A enrichment
chr4:115752629-115752629	C	T	+	6,0,1,1	18,14,14,15	0,0,0,1	37,63,75,61	0.00541505	0.0411096	0.091	T72vT0, poly-A enrichment
chr4:115824985-115824985	A	G	+	3,4,4,4	13,37,42,30	1,1,0,0	4,7,20,10	0.000607054	0.00858914	0.041	T24vT0, poly-A enrichment
chr4:118278762-118278762	C	T	+	3,2,3,2	6,10,16,6	0,0,0,0	14,12,16,9	5.41788e-06	7.43819e-05	0.227	T72vT0, poly-A enrichment
chr4:118787800-118787800	T	C	-	0,3,2,3	10,15,13,4	0,0,0,0	3,8,7,6	0.00127616	0.022878	0.182	T72vT0 ribosomal depletion
chr4:127992764-127992764	A	G	+	2,2,3,3	6,6,6,6	0,0,2,0	7,6,6,11	3.96293e-05	0.00134297	0.229	T72vT0 ribosomal depletion
chr4:128085495-128085495	A	G	+	1,2,1,6	3,3,2,4	1,0,1,2	7,4,5,3	0.00349938	0.0498497	0.223	T72vT0 ribosomal depletion
chr4:128085499-128085499	A	G	+	1,2,1,5	4,3,2,6	1,0,0,1	8,4,6,4	3.54239e-05	0.00121746	0.269	T72vT0 ribosomal depletion
chr4:139033992-139033992	A	G	+	2,1,3,2	7,5,5,12	0,0,0,0	9,6,8,9	0.000170622	0.00453505	0.227	T72vT0 ribosomal depletion
chr4:150629862-150629862	T	C	-	2,1,2,2	13,4,8,5	1,0,0,0	7,5,4,8	0.00301647	0.044451	0.174	T72vT0 ribosomal depletion
chr4:150793196-150793196	T	C	-	3,3,1,0	5,7,6,9	0,0,0,0	7,12,12,6	0.00254294	0.0390032	0.204	T72vT0 ribosomal depletion
chr4:182553224-182553224	A	G	+	3,2,1,3	6,8,10,7	1,0,1,0	8,14,16,17	0.000110775	0.00316572	0.189	T72vT0 ribosomal depletion
chr4:183292419-183292419	A	G	+	2,1,3,3	7,3,10,5	0,1,2,0	7,4,8,11	0.00101866	0.0191644	0.169	T72vT0 ribosomal depletion
chr5:238559-238559	A	G	+	6,2,1,4	20,5,17,8	0,0,0,0	8,9,10,9	4.4395e-08	0.000110451	0.226	T72vT0 ribosomal depletion, mutant A3B
chr5:1103508-1103508	G	A	-	5,5,3,2	10,8,3,6	0,0,0,2	12,14,8,9	1.37695e-07	8.2278e-06	0.322	T72vT0 ribosomal depletion
chr5:1364833-1364833	T	C	-	3,0,3,3	14,8,11,7	0,0,1,0	8,13,17,10	0.00014678	0.00164281	0.159	T72vT0, poly-A enrichment
chr5:1463798-1463798	G	A	-	6,14,12,18	458638660709	1,0,0,0	493866804774	0.000616282	0.00868112	0.019	T24vT0, poly-A enrichment
chr5:1463798-1463798	G	A	-	15,9,13,9	258232246236	0,0,0,1	590540522470	1.21625e-12	1.30965e-10	0.044	T72vT0 ribosomal depletion
chr5:1463798-1463798	G	A	-	10,15,16,11	381333285347	1,0,0,0	493866804774	1.43776e-11	3.30011e-10	0.038	T72vT0, poly-A enrichment
chr5:1468635-1468635	G	A	-	6,9,7,3	39,94,107,155	0,0,0,0	6,30,23,19	4.10188e-05	0.000831742	0.075	T24vT0, poly-A enrichment
chr5:1468635-1468635	G	A	-	5,3,2,5	40,36,51,43	0,0,0,1	31,14,20,59	6.56237e-05	0.00208502	0.078	T72vT0 ribosomal depletion
chr5:1468635-1468635	G	A	-	2,5,4,9	42,45,24,37	0,0,0,0	6,30,23,19	4.58555e-07	7.0907e-06	0.121	T72vT0, poly-A enrichment
chr5:1486105-1486105	T	C	-	1,2,3,8	42,23,47,43	0,0,1,0	30,34,28,49	7.42716e-05	0.00229732	0.071	T72vT0 ribosomal depletion
chr5:6626630-6626630	T	C	-	0,2,3,4	7,6,9,8	2,0,0,1	13,6,16,7	0.00113182	0.0207008	0.144	T72vT0 ribosomal depletion
chr5:10434387-10434387	C	T	+	3,3,2,3	9,20,32,14	0,0,0,0	15,31,62,39	2.04632e-05	0.000441658	0.154	T24vT0, poly-A enrichment
chr5:10434832-10434832	C	T	+	7,4,8,9	37,30,33,36	0,0,0,0	92166175199	0	0	0.168	T72vT0, poly-A enrichment
chr5:10434832-10434832	C	T	+	2,6,2,4	59,105,63,101	0,0,0,0	92166175199	0.00409966	0.0430735	0.039	T24vT0, poly-A enrichment
chr5:10434832-10434832	C	T	+	2,5,5,5	13,22,28,17	0,0,0,0	53,56,48,37	8.86217e-10	7.26238e-08	0.174	T72vT0 ribosomal depletion
chr5:32104453-32104453	T	C	-	6,3,5,3	2,6,3,1	0,2,0,3	16,7,7,8	4.53431e-06	0.000200361	0.491	T72vT0 ribosomal depletion
chr5:32104638-32104638	T	C	-	4,5,2,2	10,16,8,9	1,0,0,0	15,8,7,11	8.41523e-07	4.33824e-05	0.211	T72vT0 ribosomal depletion
chr5:32601019-32601019	C	T	+	8,3,122,6	33,26,787,27	0,0,0,0	1363154913291400	0	0	0.154	T72vT0, poly-A enrichment
chr5:35047246-35047246	T	C	-	5,2,1,2	17,15,6,9	0,0,2,0	11,5,11,19	0.000248669	0.00619709	0.129	T72vT0 ribosomal depletion
chr5:35057221-35057221	G	A	-	8,27,15,16	90188151127	1,0,0,0	305517276209	0	0	0.102	T72vT0 ribosomal depletion
chr5:35057221-35057221	G	A	-	61,63,63,55	541499525487	1,2,3,5	1361196019781980	0	0	0.104	T72vT0, poly-A enrichment
chr5:35058226-35058226	G	A	-	43,49,43,48	256439340322	0,0,2,2	614823676487	0	0	0.12	T72vT0 ribosomal depletion
chr5:35058226-35058226	G	A	-	34,45,47,39	290284410350	0,2,1,1	1601205419982020	0	0	0.111	T72vT0, poly-A enrichment
chr5:35058669-35058669	G	A	-	6,7,4,7	97,91,66,95	0,0,0,0	76164502260	5.23335e-09	9.76227e-08	0.064	T72vT0, poly-A enrichment
chr5:35059362-35059362	G	A	-	5,23,48,25	185508535369	0,0,0,0	2685778811002	0	0	0.054	T24vT0, poly-A enrichment
chr5:35059362-35059362	G	A	-	1,4,3,2	6,25,24,13	0,0,0,0	33,66,28,27	3.16605e-05	0.00110497	0.131	T72vT0 ribosomal depletion
chr5:35059362-35059362	G	A	-	7,7,11,12	57,57,90,88	0,0,0,0	2685778811002	0	0	0.112	T72vT0, poly-A enrichment
chr5:35059584-35059584	G	A	-	37,34,47,38	624879904864	0,0,0,1	856138511701332	0	0	0.046	T24vT0, poly-A enrichment
chr5:35059584-35059584	G	A	-	26,57,66,57	105221172139	0,0,0,1	322378304276	0	0	0.242	T72vT0 ribosomal depletion
chr5:35059584-35059584	G	A	-	143127161151	497459562506	0,0,0,1	856138511701332	0	0	0.223	T72vT0, poly-A enrichment
chr5:35060772-35060772	G	A	-	62,78,127,89	477576532555	0,0,0,0	9391038868736	0	0	0.141	T72vT0 ribosomal depletion
chr5:35060772-35060772	G	A	-	39,43,45,42	303307369382	0,0,0,2	929197018031905	0	0	0.111	T72vT0, poly-A enrichment
chr5:35063572-35063572	G	A	-	37,46,56,79	614905886841	1,0,0,0	1021157013521440	0	0	0.062	T24vT0, poly-A enrichment
chr5:35063572-35063572	G	A	-	256305291318	898969928853	0,1,1,0	1787183017791400	0	0	0.243	T72vT0 ribosomal depletion
chr5:35063572-35063572	G	A	-	145154135153	518621632690	1,0,0,0	1021157013521440	0	0	0.193	T72vT0, poly-A enrichment
chr5:35065829-35065829	G	A	-	119,53,54,62	1593213621052070	0,2,1,0	1954255726372640	0	0	0.037	T24vT0, poly-A enrichment
chr5:35065829-35065829	G	A	-	299300296368	1518135114091390	0,0,0,0	2472243324982050	0	0	0.182	T72vT0 ribosomal depletion
chr5:35065829-35065829	G	A	-	386331370419	1449154113951350	0,2,1,0	1954255726372640	0	0	0.208	T72vT0, poly-A enrichment
chr5:35066054-35066054	G	A	-	79,96,66,83	636590530563	0,0,1,1	2076207721101780	0	0	0.122	T72vT0 ribosomal depletion
chr5:35073183-35073183	G	A	-	3,5,5,4	22,107,111,92	0,0,0,0	21,81,83,128	0.000131163	0.00231334	0.062	T24vT0, poly-A enrichment
chr5:35073183-35073183	G	A	-	18,27,26,29	83,90,93,103	0,0,0,0	125150151144	0	0	0.212	T72vT0 ribosomal depletion
chr5:35073183-35073183	G	A	-	6,10,8,13	27,30,31,48	0,0,0,0	21,81,83,128	0	0	0.213	T72vT0, poly-A enrichment
chr5:35084832-35084832	G	A	-	0,3,3,3	5,10,8,11	0,0,0,0	10,25,18,10	4.43336e-05	0.000884866	0.179	T24vT0, poly-A enrichment
chr5:35085824-35085824	G	A	-	3,3,3,3	2,13,14,12	0,0,0,0	10,17,26,15	2.254e-07	7.92885e-06	0.291	T24vT0, poly-A enrichment
chr5:35085824-35085824	G	A	-	35,41,37,40	139135111153	0,0,0,0	187230212178	0	0	0.223	T72vT0 ribosomal depletion
chr5:35088117-35088117	G	A	-	3,3,3,3	4,3,1,1	0,0,0,0	3,8,6,3	9.8761e-12	6.48259e-10	0.607	T24vT0, poly-A enrichment
chr5:35088117-35088117	G	A	-	33,19,33,35	110129134166	0,0,0,0	221211249197	0	0	0.183	T72vT0 ribosomal depletion
chr5:35092120-35092120	G	A	-	3,3,3,3	1,4,10,12	0,0,0,0	5,12,5,9	5.04748e-08	2.00858e-06	0.402	T24vT0, poly-A enrichment
chr5:35092120-35092120	G	A	-	11,10,11,10	98,109,128,99	0,0,0,0	115136142111	1.05471e-13	1.21446e-11	0.089	T72vT0 ribosomal depletion
chr5:35112149-35112149	G	A	-	13,17,15,13	163137151166	0,0,0,0	169205204152	0	0	0.087	T72vT0 ribosomal depletion
chr5:35118077-35118077	G	A	-	1,0,305,2	6,6,1016,15	0,0,0,0	1228211019661850	0	0	0.123	T72vT0, poly-A enrichment
chr5:35128146-35128146	T	C	-	4,11,4,2	9,28,26,26	3,4,0,1	24,38,35,37	0.000683987	0.0141507	0.14	T72vT0 ribosomal depletion
chr5:35163371-35163371	G	A	-	12,15,14,16	249216244252	0,0,0,0	306253291262	7.88258e-15	9.86887e-13	0.056	T72vT0 ribosomal depletion
chr5:35203134-35203134	G	A	-	16,13,14,13	270302277322	0,0,0,0	277349313310	9.32587e-13	1.02164e-10	0.046	T72vT0 ribosomal depletion
chr5:35212284-35212284	G	A	-	3,3,3,3	5,13,15,14	0,0,0,0	6,11,17,13	4.1015e-07	1.36012e-05	0.226	T24vT0, poly-A enrichment
chr5:35212284-35212284	G	A	-	5,9,9,7	58,154,107,79	0,0,0,0	89,109,99,88	4.60291e-09	3.41698e-07	0.073	T72vT0 ribosomal depletion
chr5:35212654-35212654	G	A	-	3,3,3,3	11,10,10,10	0,0,0,0	13,13,18,15	2.60348e-07	9.00887e-06	0.227	T24vT0, poly-A enrichment
chr5:35212654-35212654	G	A	-	7,7,6,6	104151147115	0,0,0,0	111157142136	7.85397e-07	4.07554e-05	0.049	T72vT0 ribosomal depletion
chr5:35215281-35215281	G	A	-	3,3,3,3	3,16,32,24	0,0,0,0	14,14,13,8	8.16315e-06	0.000197623	0.214	T24vT0, poly-A enrichment
chr5:35215281-35215281	G	A	-	3,1,2,3	23,19,19,22	0,0,0,0	14,14,13,8	0.00128438	0.0118292	0.095	T72vT0, poly-A enrichment
chr5:35229312-35229312	G	A	-	11,8,13,12	161136163148	0,0,0,0	174170187147	9.26703e-13	1.01873e-10	0.067	T72vT0 ribosomal depletion
chr5:35229425-35229425	G	A	-	27,29,32,25	378381383444	1,0,0,0	433416329385	0	0	0.066	T72vT0 ribosomal depletion
chr5:39059325-39059325	T	C	-	2,2,2,2	5,11,13,8	1,0,1,0	5,8,11,7	0.00149401	0.0259559	0.131	T72vT0 ribosomal depletion
chr5:40826641-40826641	G	A	-	7,8,6,7	40,30,29,31	0,1,0,0	40,80,61,53	4.77729e-13	5.36383e-11	0.176	T72vT0 ribosomal depletion
chr5:40826641-40826641	G	A	-	4,4,5,6	24,30,32,47	0,0,0,0	77124120117	2.74217e-10	5.65369e-09	0.127	T72vT0, poly-A enrichment
chr5:43038684-43038684	T	C	-	3,3,2,1	7,1,2,2	1,0,0,0	5,7,9,8	2.56275e-07	1.48085e-05	0.429	T72vT0 ribosomal depletion
chr5:43128775-43128775	A	G	+	8,8,7,2	19,27,17,25	0,3,3,1	20,34,22,23	0.000201527	0.00524602	0.162	T72vT0 ribosomal depletion
chr5:53001653-53001653	A	G	+	3,2,4,1	14,8,5,6	0,0,0,1	5,4,6,8	4.79991e-06	0.00021033	0.213	T72vT0 ribosomal depletion
chr5:55310911-55310911	A	G	+	5,4,0,8	10,8,11,19	0,1,1,2	17,9,11,10	0.00035978	0.00854106	0.153	T72vT0 ribosomal depletion
chr5:55980929-55980929	T	C	-	11,2,5,3	16,14,25,20	0,0,2,1	9,6,12,15	6.45786e-05	0.00205388	0.156	T72vT0 ribosomal depletion
chr5:57220728-57220728	A	G	+	12,4,6,6	11,12,5,9	2,2,0,2	8,10,13,10	8.66766e-05	0.00258473	0.296	T72vT0 ribosomal depletion
chr5:57247538-57247538	A	G	+	1,7,7,2	18,17,23,26	2,2,1,1	24,26,22,26	0.00337822	0.0484688	0.105	T72vT0 ribosomal depletion
chr5:62314066-62314066	A	G	+	8,4,4,3	7,3,3,6	2,0,0,1	5,3,4,5	1.02762e-05	0.000412487	0.389	T72vT0 ribosomal depletion
chr5:62322653-62322653	A	G	+	5,2,6,8	2,4,8,10	0,3,0,1	4,6,3,3	0.000798419	0.015933	0.334	T72vT0 ribosomal depletion
chr5:66154620-66154620	C	T	+	0,3,3,3	3,13,13,2	0,0,0,0	9,16,27,30	9.39492e-05	0.00172883	0.244	T24vT0, poly-A enrichment
chr5:66155542-66155542	C	T	+	3,3,3,3	6,29,14,19	0,0,0,0	14,44,30,38	1.90337e-06	5.45454e-05	0.185	T24vT0, poly-A enrichment
chr5:66155542-66155542	C	T	+	2,4,3,2	15,12,10,15	0,0,0,0	16,32,23,20	3.267e-06	0.000149816	0.179	T72vT0 ribosomal depletion
chr5:69097572-69097572	A	G	+	2,1,4,4	30,34,16,23	0,0,1,0	42,30,30,35	6.19215e-05	0.010011	0.102	T72vT0 ribosomal depletion, mutant A3B
chr5:69206601-69206601	A	G	+	3,1,1,3	12,6,10,19	0,0,1,0	5,9,12,16	0.000945853	0.0180968	0.123	T72vT0 ribosomal depletion
chr5:69224659-69224659	A	G	+	2,0,5,5	6,4,2,12	0,1,0,2	7,1,3,6	0.00197314	0.0321552	0.127	T72vT0 ribosomal depletion
chr5:69238561-69238561	A	G	+	4,2,2,0	7,4,3,1	0,0,1,1	5,5,10,9	0.000159061	0.00428554	0.227	T72vT0 ribosomal depletion
chr5:69300099-69300099	G	A	-	5,5,8,5	137192234212	0,1,0,0	110194185157	0.0012178	0.0155075	0.028	T24vT0, poly-A enrichment
chr5:69300099-69300099	G	A	-	8,8,10,6	138132150167	0,1,0,0	110194185157	2.39191e-08	4.19548e-07	0.051	T72vT0, poly-A enrichment
chr5:69524130-69524130	A	G	+	2,3,3,2	3,10,5,16	0,0,0,0	2,6,12,6	2.82282e-06	0.000131551	0.279	T72vT0 ribosomal depletion
chr5:71557803-71557803	A	G	+	2,2,3,1	3,5,7,7	2,0,0,0	8,5,2,4	0.000484671	0.0107838	0.228	T72vT0 ribosomal depletion
chr5:73012359-73012359	A	G	+	4,2,1,2	2,13,4,5	0,0,0,1	7,2,6,6	1.21895e-05	0.000477878	0.286	T72vT0 ribosomal depletion
chr5:73047860-73047860	A	G	+	1,5,1,2	11,12,5,10	1,0,0,0	8,11,10,5	0.000131459	0.0036639	0.15	T72vT0 ribosomal depletion
chr5:74745088-74745088	T	C	-	8,4,7,5	26,7,19,16	1,0,1,3	5,6,15,10	0.00376489	0.0305138	0.162	T72vT0, poly-A enrichment
chr5:78166081-78166081	T	C	-	8,1,1,6	11,12,9,4	2,0,0,0	3,3,6,12	6.82189e-05	0.00215231	0.199	T72vT0 ribosomal depletion
chr5:78398903-78398903	A	G	+	4,1,0,3	12,15,5,10	0,0,0,0	6,19,17,11	0.00139612	0.0245939	0.136	T72vT0 ribosomal depletion
chr5:79230681-79230681	T	C	-	4,1,5,4	35,28,21,21	0,1,0,0	8,7,6,1	0.00010288	0.00296425	0.091	T72vT0 ribosomal depletion
chr5:79257863-79257863	A	G	+	4,1,3,2	8,5,7,3	0,0,0,1	8,10,5,4	5.19317e-06	0.000224138	0.25	T72vT0 ribosomal depletion
chr5:80413155-80413155	A	G	+	2,0,3,3	12,12,8,13	0,0,0,0	11,14,10,17	0.00130292	0.0232243	0.151	T72vT0 ribosomal depletion
chr5:81277051-81277051	T	C	-	1,2,4,3	11,12,13,19	1,0,0,1	10,11,16,9	0.000427155	0.00975161	0.102	T72vT0 ribosomal depletion
chr5:82277835-82277835	G	A	-	28,34,135,36	1537167224811780	0,0,0,0	2093227419492020	0	0	0.027	T72vT0, poly-A enrichment
chr5:96770553-96770553	C	T	+	6,9,12,7	331400363350	0,0,0,1	472420366342	0.000937443	0.00887121	0.022	T72vT0, poly-A enrichment
chr5:97034028-97034028	C	T	+	3,3,8,8	35,48,75,63	0,0,0,0	51,86,96,105	7.69193e-09	3.49818e-07	0.087	T24vT0, poly-A enrichment
chr5:97034028-97034028	C	T	+	4,7,4,4	17,26,20,18	0,0,0,0	28,34,38,22	6.95371e-10	5.81935e-08	0.188	T72vT0 ribosomal depletion
chr5:97034028-97034028	C	T	+	4,3,5,6	27,26,28,29	0,0,0,0	51,86,96,105	4.47968e-10	9.2037e-09	0.139	T72vT0, poly-A enrichment
chr5:103260049-103260049	C	T	+	3,6,4,2	2,9,5,4	0,0,0,1	7,11,9,13	6.6561e-10	3.56129e-08	0.427	T24vT0, poly-A enrichment
chr5:107490452-107490452	G	A	-	3,3,5,4	11,9,13,17	0,0,0,0	23,16,19,40	3.83067e-09	2.87756e-07	0.233	T72vT0 ribosomal depletion
chr5:107633788-107633788	G	A	-	6,8,8,8	29,31,27,28	0,0,0,0	24,30,19,29	9.19054e-12	9.20513e-10	0.207	T72vT0 ribosomal depletion
chr5:112887100-112887100	G	A	-	50,44,43,36	301290290287	1,0,0,0	1729154914761490	0	0	0.129	T72vT0 ribosomal depletion
chr5:112887100-112887100	G	A	-	70,60,203,59	98795817631003	2,2,2,3	2655392934633620	0	0	0.07	T72vT0, poly-A enrichment
chr5:112986612-112986612	A	G	+	5,3,4,6	12,19,10,16	0,0,1,0	34,26,31,35	3.62403e-10	3.12399e-08	0.239	T72vT0 ribosomal depletion
chr5:112987484-112987484	A	G	+	4,5,1,0	5,2,1,5	1,0,0,1	8,6,5,6	1.6791e-05	0.000635197	0.351	T72vT0 ribosomal depletion
chr5:113005815-113005815	C	T	+	0,3,3,3	3,9,9,13	0,0,0,0	4,4,4,8	4.88272e-05	0.000968482	0.172	T24vT0, poly-A enrichment
chr5:117469732-117469732	C	T	+	5,6,7,6	42,50,54,39	0,0,0,0	17,25,20,33	9.70393e-08	5.87637e-06	0.115	T72vT0 ribosomal depletion
chr5:122804571-122804571	A	G	+	6,4,1,7	1,2,1,10	2,0,1,2	3,2,5,6	0.00190193	0.0312857	0.405	T72vT0 ribosomal depletion
chr5:122882084-122882084	A	G	+	0,2,3,3	4,5,4,2	1,0,0,0	3,8,7,5	7.1319e-05	0.00221686	0.266	T72vT0 ribosomal depletion
chr5:128055090-128055090	T	C	-	2,0,2,4	10,5,4,7	0,0,1,0	7,14,5,1	9.82235e-05	0.0127397	0.174	T72vT0 ribosomal depletion, mutant A3B
chr5:131453577-131453577	T	C	-	1,2,4,2	7,7,5,3	0,0,1,0	6,8,6,9	1.71503e-05	0.000645694	0.262	T72vT0 ribosomal depletion
chr5:131648288-131648288	T	C	-	2,4,3,2	15,3,7,9	1,0,0,1	3,13,9,11	2.08655e-05	0.000764582	0.209	T72vT0 ribosomal depletion
chr5:131750880-131750880	T	C	-	6,2,2,3	10,18,9,14	1,0,0,0	13,10,15,8	3.34656e-07	0.000436121	0.19	T72vT0 ribosomal depletion, mutant A3B
chr5:132756748-132756748	G	A	-	7,7,9,7	263224231221	0,0,0,0	176326269297	2.59959e-05	0.000328498	0.031	T72vT0, poly-A enrichment
chr5:132916011-132916011	T	C	-	5,3,4,3	13,15,15,10	1,1,1,1	12,23,10,18	0.000270744	0.00666527	0.156	T72vT0 ribosomal depletion
chr5:134205956-134205956	G	A	-	1,7,7,7	63,94,112,106	0,0,0,0	795973800953	3.25475e-07	1.10818e-05	0.051	T24vT0, poly-A enrichment
chr5:134205956-134205956	G	A	-	9,3,54,11	39,46,321,28	0,0,0,0	795973800953	0	0	0.169	T72vT0, poly-A enrichment
chr5:134527021-134527021	T	C	-	4,6,2,4	2,3,6,3	0,0,4,2	9,7,10,6	0.000334837	0.00349113	0.405	T72vT0, poly-A enrichment
chr5:134624326-134624326	T	C	-	3,1,3,1	9,7,7,11	0,1,0,0	9,7,12,7	0.000441016	0.010039	0.158	T72vT0 ribosomal depletion
chr5:134628559-134628559	T	C	-	1,9,3,3	4,6,9,8	0,1,0,0	13,10,8,6	5.28343e-08	3.33385e-06	0.308	T72vT0 ribosomal depletion
chr5:134777089-134777089	A	G	+	4,1,1,1	12,6,6,8	0,0,1,0	8,4,4,6	0.000612092	0.0352823	0.112	T72vT0 ribosomal depletion, mutant A3B
chr5:138162262-138162262	T	C	-	2,2,2,1	10,6,4,8	0,0,1,0	7,7,10,10	0.00223381	0.0355046	0.193	T72vT0 ribosomal depletion
chr5:138321081-138321081	T	C	-	3,2,0,3	5,5,3,7	0,0,1,0	14,2,8,7	9.87634e-05	0.00287984	0.212	T72vT0 ribosomal depletion
chr5:138406260-138406260	A	G	+	4,0,4,2	3,7,9,8	0,0,1,0	6,8,10,4	1.54738e-05	0.000594638	0.247	T72vT0 ribosomal depletion
chr5:138561090-138561090	G	A	-	2,3,3,3	4,6,3,9	0,0,0,0	7,20,11,17	1.25083e-08	5.41771e-07	0.354	T24vT0, poly-A enrichment
chr5:138561090-138561090	G	A	-	2,2,2,2	12,13,13,15	0,0,0,0	11,15,10,7	0.00144489	0.0252696	0.132	T72vT0 ribosomal depletion
chr5:138756605-138756605	C	T	+	1,2,4,5	23,34,29,23	0,0,0,0	20,40,26,21	5.58964e-05	0.00181995	0.099	T72vT0 ribosomal depletion
chr5:138879733-138879733	A	G	+	3,2,4,0	11,10,11,16	0,0,2,1	13,12,23,15	0.00241738	0.0375152	0.126	T72vT0 ribosomal depletion
chr5:139284349-139284349	A	G	+	2,5,1,5	32,36,22,28	0,1,0,0	7,10,10,10	0.000306556	0.00742844	0.071	T72vT0 ribosomal depletion
chr5:139368837-139368837	C	T	+	19,22,23,20	370415448430	0,0,0,0	530819699724	0	0	0.048	T24vT0, poly-A enrichment
chr5:139368837-139368837	C	T	+	29,51,36,27	129175141149	0,0,0,0	265298241255	0	0	0.192	T72vT0 ribosomal depletion
chr5:139368837-139368837	C	T	+	36,32,72,53	240273517311	0,0,0,0	530819699724	0	0	0.126	T72vT0, poly-A enrichment
chr5:139390440-139390440	C	T	+	3,8,5,9	44119128148	0,0,0,0	22,62,59,59	9.65682e-06	0.000230281	0.055	T24vT0, poly-A enrichment
chr5:139390440-139390440	C	T	+	40,38,38,45	111,87,87,103	0,0,0,0	135120133149	0	0	0.294	T72vT0 ribosomal depletion
chr5:139390440-139390440	C	T	+	20,19,15,15	66,52,48,50	0,0,0,0	22,62,59,59	0	0	0.242	T72vT0, poly-A enrichment
chr5:139395368-139395368	C	T	+	4,9,5,5	106246211187	0,0,0,0	37,84,68,83	0.00178879	0.0215705	0.03	T24vT0, poly-A enrichment
chr5:139395368-139395368	C	T	+	32,25,27,27	195148198155	0,0,0,0	149111123197	0	0	0.138	T72vT0 ribosomal depletion
chr5:139395368-139395368	C	T	+	20,25,19,18	145125156150	0,0,0,0	37,84,68,83	6.66134e-16	1.89092e-14	0.126	T72vT0, poly-A enrichment
chr5:139418194-139418194	A	G	+	3,8,3,10	23,47,42,42	2,6,1,4	46,87,77,76	0.000422315	0.00625321	0.088	T24vT0, poly-A enrichment
chr5:139562197-139562197	A	G	+	5,4,6,4	34,30,30,25	1,0,0,2	38,35,36,47	9.43991e-07	4.83489e-05	0.121	T72vT0 ribosomal depletion
chr5:139686744-139686744	C	T	+	1,1,5,7	27,39,25,24	0,0,0,2	23,26,20,17	9.83536e-05	0.00287054	0.087	T72vT0 ribosomal depletion
chr5:139697685-139697685	A	G	+	2,6,0,2	15,11,7,10	0,0,0,0	3,4,2,14	2.53447e-05	0.0009097	0.159	T72vT0 ribosomal depletion
chr5:140111983-140111983	C	T	+	3,3,3,3	5,16,20,24	0,0,0,0	2,11,5,9	5.24628e-06	0.000132552	0.194	T24vT0, poly-A enrichment
chr5:140111983-140111983	C	T	+	3,4,4,3	31,36,36,34	0,0,0,0	35,30,45,51	9.10966e-06	0.000368474	0.092	T72vT0 ribosomal depletion
chr5:140558746-140558746	G	A	-	4,14,11,5	45,92,106,91	0,1,0,4	90113142141	4.7324e-10	2.64309e-08	0.081	T24vT0, poly-A enrichment
chr5:140558746-140558746	G	A	-	6,4,7,4	82,86,82,86	0,1,0,6	142124128101	9.01046e-05	0.00267507	0.043	T72vT0 ribosomal depletion
chr5:140558746-140558746	G	A	-	10,6,9,4	55,46,47,47	0,1,0,4	90113142141	7.7488e-12	1.79968e-10	0.118	T72vT0, poly-A enrichment
chr5:140645539-140645539	G	A	-	9,17,8,12	343409419364	0,1,3,0	670722657731	2.42168e-07	3.85631e-06	0.028	T72vT0, poly-A enrichment
chr5:140647356-140647356	G	A	-	4,4,4,6	43,35,38,42	0,1,0,0	668546552551	4.14091e-09	3.08855e-07	0.102	T72vT0 ribosomal depletion
chr5:140647356-140647356	G	A	-	3,2,78,2	42,39,979,45	0,0,0,1	1179143912681360	0	0	0.058	T72vT0, poly-A enrichment
chr5:140695016-140695016	A	G	+	5,6,2,8	6,6,4,10	1,2,1,3	6,8,14,4	0.00356189	0.0291094	0.224	T72vT0, poly-A enrichment
chr5:141269713-141269713	T	C	-	2,2,2,3	13,12,13,9	1,0,0,1	4,2,5,9	0.00167701	0.028446	0.09	T72vT0 ribosomal depletion
chr5:141411112-141411112	A	G	+	7,7,3,5	9,12,21,11	0,1,0,1	11,10,7,8	4.87059e-07	2.64943e-05	0.26	T72vT0 ribosomal depletion
chr5:141526772-141526772	T	C	-	3,1,1,3	12,6,7,6	0,1,0,1	6,10,10,8	0.000279428	0.0228272	0.15	T72vT0 ribosomal depletion, mutant A3B
chr5:141823293-141823293	T	C	-	2,4,4,0	22,32,25,24	0,0,0,0	7,14,7,17	0.00102041	0.0191745	0.083	T72vT0 ribosomal depletion
chr5:141922943-141922943	T	C	-	5,2,2,3	1,2,5,5	0,0,1,3	4,3,4,6	0.00130124	0.0119657	0.365	T72vT0, poly-A enrichment
chr5:146131992-146131992	G	A	-	3,3,3,3	25,71,38,42	0,0,0,0	24,42,53,55	0.00065322	0.00905088	0.072	T24vT0, poly-A enrichment
chr5:146131992-146131992	G	A	-	6,4,6,6	21,19,20,29	0,0,0,0	39,24,27,19	1.35381e-10	1.23447e-08	0.2	T72vT0 ribosomal depletion
chr5:146131992-146131992	G	A	-	5,6,5,6	31,29,23,30	0,0,0,0	24,42,53,55	1.13669e-10	2.42e-09	0.164	T72vT0, poly-A enrichment
chr5:146271606-146271606	C	T	+	3,8,8,19	156150165177	0,0,0,0	154160151171	6.77569e-10	5.71585e-08	0.053	T72vT0 ribosomal depletion
chr5:149535932-149535932	T	C	-	2,3,0,4	8,10,8,4	0,0,0,0	14,11,14,9	4.06755e-05	0.00137547	0.233	T72vT0 ribosomal depletion
chr5:150503348-150503348	A	G	+	2,2,2,2	6,6,3,12	0,0,1,1	3,8,4,5	0.00086255	0.0168923	0.169	T72vT0 ribosomal depletion
chr5:150503354-150503354	A	G	+	1,2,1,3	8,6,6,14	0,0,1,0	3,9,5,9	0.00167366	0.0284045	0.128	T72vT0 ribosomal depletion
chr5:150519054-150519054	A	G	+	4,3,1,1	11,4,10,13	1,1,0,0	6,11,9,7	0.000685855	0.01418	0.158	T72vT0 ribosomal depletion
chr5:150648309-150648309	C	T	+	2,1,2,2	9,7,8,8	0,0,0,0	31,22,14,18	0.000294803	0.00717119	0.177	T72vT0 ribosomal depletion
chr5:151073788-151073788	T	C	-	2,0,3,3	9,8,8,4	2,0,0,0	5,5,7,5	0.00172228	0.0290577	0.149	T72vT0 ribosomal depletion
chr5:151268584-151268584	A	G	+	13,9,10,8	133151133132	0,3,2,2	125153183209	3.6842e-09	6.96088e-08	0.058	T72vT0, poly-A enrichment
chr5:154736624-154736624	A	G	+	4,1,1,2	15,13,5,5	0,1,1,0	14,6,18,6	0.000510526	0.0315385	0.135	T72vT0 ribosomal depletion, mutant A3B
chr5:154828829-154828829	A	G	+	3,4,2,5	16,12,10,12	1,0,1,0	8,3,3,4	0.000147457	0.00404507	0.127	T72vT0 ribosomal depletion
chr5:154966882-154966882	C	T	+	10,8,8,9	292223215221	0,0,1,0	268245212213	8.11518e-07	2.50822e-05	0.035	T24vT0, poly-A enrichment
chr5:154966882-154966882	C	T	+	8,9,8,2	128104107131	0,0,0,4	110102101124	6.62039e-06	0.000276288	0.048	T72vT0 ribosomal depletion
chr5:154966882-154966882	C	T	+	21,21,9,8	268267238198	0,0,1,0	268245212213	7.01661e-14	1.85719e-12	0.054	T72vT0, poly-A enrichment
chr5:157287824-157287824	A	G	+	3,2,2,2	4,5,12,8	1,0,1,0	6,5,4,4	0.000413183	0.0095014	0.179	T72vT0 ribosomal depletion
chr5:157319891-157319891	C	T	+	11,9,7,6	174276231261	0,0,0,0	156240227242	2.97765e-06	8.14172e-05	0.036	T24vT0, poly-A enrichment
chr5:157319891-157319891	C	T	+	9,4,8,8	122,100,111,93	0,0,0,1	168149160178	2.13243e-09	1.66119e-07	0.062	T72vT0 ribosomal depletion
chr5:157319891-157319891	C	T	+	15,11,22,8	131173135151	0,0,0,0	156240227242	0	0	0.088	T72vT0, poly-A enrichment
chr5:157830156-157830156	T	C	-	1,2,3,1	5,4,9,9	0,0,0,0	7,9,6,7	0.00232848	0.0365127	0.212	T72vT0 ribosomal depletion
chr5:160113132-160113132	T	C	-	1,1,1,5	10,6,6,6	0,1,0,0	4,8,10,8	0.000400489	0.00930445	0.18	T72vT0 ribosomal depletion
chr5:168295482-168295482	C	T	+	7,7,17,17	17,15,17,19	0,0,0,3	15,31,18,27	4.90719e-14	5.77693e-12	0.371	T72vT0 ribosomal depletion
chr5:168358430-168358430	A	G	+	1,2,2,3	12,9,11,9	0,1,0,0	8,5,9,17	0.000908289	0.0175699	0.124	T72vT0 ribosomal depletion
chr5:168549487-168549487	G	A	-	3,3,3,3	12,17,27,18	0,0,0,0	20,18,90,34	2.2042e-06	6.18245e-05	0.148	T24vT0, poly-A enrichment
chr5:168555761-168555761	G	A	-	7,10,9,4	56126144130	0,0,0,0	61178175206	1.64263e-09	8.23514e-08	0.068	T24vT0, poly-A enrichment
chr5:168555761-168555761	G	A	-	3,5,4,4	9,15,14,11	0,0,0,0	17,31,28,24	7.3709e-10	6.11979e-08	0.247	T72vT0 ribosomal depletion
chr5:168555761-168555761	G	A	-	10,7,13,14	29,22,31,38	0,0,0,0	61178175206	0	0	0.266	T72vT0, poly-A enrichment
chr5:171410091-171410091	T	C	-	6,2,3,1	7,5,8,5	1,3,1,0	8,13,8,13	0.00102697	0.0464545	0.194	T72vT0 ribosomal depletion, mutant A3B
chr5:171425949-171425949	T	C	-	5,3,5,3	5,1,4,2	0,3,0,2	2,6,5,7	0.000354471	0.00367349	0.462	T72vT0, poly-A enrichment
chr5:172217763-172217763	T	C	-	0,5,2,3	10,9,8,11	1,0,0,2	7,7,11,10	0.000137475	0.0150804	0.12	T72vT0 ribosomal depletion, mutant A3B
chr5:172280262-172280262	T	C	-	4,1,2,3	15,26,17,22	1,0,1,0	27,26,29,22	0.000605559	0.0128138	0.101	T72vT0 ribosomal depletion
chr5:172918336-172918336	C	T	+	2,3,3,3	5,4,4,8	0,0,0,0	1,3,5,11	2.29422e-08	1.52064e-06	0.354	T72vT0 ribosomal depletion
chr5:173026129-173026129	A	G	+	2,1,5,1	8,1,12,5	2,0,0,0	7,2,12,1	0.000125511	0.0145515	0.235	T72vT0 ribosomal depletion, mutant A3B
chr5:173067078-173067078	A	G	+	3,4,3,6	8,5,3,3	3,1,1,0	8,8,9,4	0.000513058	0.0112657	0.35	T72vT0 ribosomal depletion
chr5:173318652-173318652	G	A	-	14,16,14,18	314231280232	1,0,1,0	218232225158	1.14886e-12	1.24132e-10	0.055	T72vT0 ribosomal depletion
chr5:173320360-173320360	G	A	-	28,19,16,29	188164154160	0,0,0,0	146136135132	0	0	0.12	T72vT0 ribosomal depletion
chr5:173320360-173320360	G	A	-	8,6,10,11	168224206219	0,0,0,0	109261241223	6.91719e-08	1.15799e-06	0.041	T72vT0, poly-A enrichment
chr5:173322934-173322934	G	A	-	43,43,28,44	182183250235	0,0,0,0	192227190159	0	0	0.16	T72vT0 ribosomal depletion
chr5:173322934-173322934	G	A	-	10,9,8,8	103105144131	0,0,0,0	123330227248	1.53433e-12	3.74096e-11	0.069	T72vT0, poly-A enrichment
chr5:173325526-173325526	G	A	-	3,3,3,2	25,30,39,31	0,0,0,0	49,61,46,57	0.000381068	0.0056821	0.083	T24vT0, poly-A enrichment
chr5:173325526-173325526	G	A	-	39,39,32,38	157136145114	0,0,0,0	129140129102	0	0	0.213	T72vT0 ribosomal depletion
chr5:173325526-173325526	G	A	-	7,9,7,7	48,55,44,52	0,0,0,0	49,61,46,57	1.96319e-11	4.4368e-10	0.131	T72vT0, poly-A enrichment
chr5:176475625-176475625	A	G	+	1,3,3,4	2,4,6,5	1,0,2,1	2,3,7,9	0.0023109	0.0363097	0.221	T72vT0 ribosomal depletion
chr5:177137003-177137003	C	T	+	5,3,3,4	5,13,9,6	0,0,0,0	5,15,11,12	1.13008e-09	5.80258e-08	0.334	T24vT0, poly-A enrichment
chr5:177137003-177137003	C	T	+	1,3,4,2	11,7,14,4	0,0,0,3	15,13,9,16	8.32902e-05	0.00250745	0.195	T72vT0 ribosomal depletion
chr5:177158442-177158442	A	G	+	1,4,2,5	7,2,5,7	2,0,0,1	4,4,2,9	0.000315546	0.00763458	0.265	T72vT0 ribosomal depletion
chr5:177177570-177177570	A	G	+	1,6,3,1	3,5,9,5	0,1,1,0	5,5,3,16	2.62372e-05	0.000939596	0.199	T72vT0 ribosomal depletion
chr5:177298648-177298648	C	T	+	9,9,10,5	32,38,45,37	0,0,0,0	44,49,55,61	3.53051e-14	4.23527e-12	0.178	T72vT0 ribosomal depletion
chr5:177298648-177298648	C	T	+	11,12,11,7	49,44,45,47	0,0,0,0	99,92,101,123	0	0	0.181	T72vT0, poly-A enrichment
chr5:177320663-177320663	T	C	-	1,4,5,1	5,7,7,8	1,1,0,1	4,3,4,6	0.00160414	0.0275656	0.116	T72vT0 ribosomal depletion
chr5:177595503-177595503	C	T	+	46,62,48,29	848122812071314	0,0,0,0	862132112021186	0	0	0.04	T24vT0, poly-A enrichment
chr5:177595503-177595503	C	T	+	125132138155	452356449393	0,0,0,0	577486474477	0	0	0.251	T72vT0 ribosomal depletion
chr5:177595503-177595503	C	T	+	227261232184	970966947962	0,0,0,0	862132112021186	0	0	0.19	T72vT0, poly-A enrichment
chr5:178216949-178216949	T	C	-	3,3,0,3	7,12,4,12	0,0,1,0	15,20,15,10	7.7765e-05	0.00238898	0.159	T72vT0 ribosomal depletion
chr5:178230686-178230686	G	A	-	3,2,3,3	4,10,16,15	0,0,0,0	11,10,21,21	1.4059e-06	4.12506e-05	0.23	T24vT0, poly-A enrichment
chr5:179617871-179617871	G	A	-	18,13,17,29	66,69,67,76	0,1,0,2	313486343434	0	0	0.211	T72vT0 ribosomal depletion
chr5:179617871-179617871	G	A	-	25,24,166,19	117102769136	0,0,3,0	861130312121177	0	0	0.166	T72vT0, poly-A enrichment
chr5:179677109-179677109	T	C	-	5,1,1,5	10,9,5,10	1,0,0,2	10,5,3,7	0.000361567	0.00857059	0.155	T72vT0 ribosomal depletion
chr5:179729536-179729536	C	T	+	48,48,84,116	1290188920612090	1,2,0,2	1706235921932380	0	0	0.037	T24vT0, poly-A enrichment
chr5:179729536-179729536	C	T	+	107105114111	116711851034982	0,0,0,0	1369139613011100	0	0	0.092	T72vT0 ribosomal depletion
chr5:179729536-179729536	C	T	+	103,81,94,92	9537721018915	1,2,0,2	1706235921932380	0	0	0.092	T72vT0, poly-A enrichment
chr5:179791723-179791723	T	C	-	2,4,3,4	0,1,2,7	0,5,1,4	9,10,9,10	0.0016629	0.0148048	0.511	T72vT0, poly-A enrichment
chr5:179999277-179999277	T	C	-	2,1,4,0	8,4,3,4	1,0,0,0	6,4,6,6	0.000736406	0.0389059	0.207	T72vT0 ribosomal depletion, mutant A3B
chr5:180294721-180294721	C	T	+	4,9,6,6	35,75,65,69	0,0,0,1	38,45,54,66	7.14028e-08	2.78909e-06	0.09	T24vT0, poly-A enrichment
chr5:180294721-180294721	C	T	+	7,3,3,6	16,17,12,12	0,0,0,0	16,13,17,9	1.2785e-09	1.02638e-07	0.247	T72vT0 ribosomal depletion
chr5:180294721-180294721	C	T	+	18,13,17,25	41,49,47,55	0,0,0,1	38,45,54,66	0	0	0.269	T72vT0, poly-A enrichment
chr5:180489973-180489973	T	C	-	0,1,6,3	5,20,16,20	0,0,0,0	3,9,7,9	0.000127962	0.00226945	0.113	T24vT0, poly-A enrichment
chr5:180496138-180496138	A	G	+	1,3,3,1	9,8,7,12	1,0,0,0	6,17,10,12	0.000183308	0.0179164	0.152	T72vT0 ribosomal depletion, mutant A3B
chr5:181249428-181249428	A	G	+	11,7,6,8	32,15,24,44	0,4,4,2	27,33,39,48	2.63729e-05	0.000332547	0.172	T72vT0, poly-A enrichment
chr5:181252784-181252784	C	T	+	3,2,2,10	42,51,52,61	0,0,0,0	36,46,35,57	7.20298e-06	0.000298234	0.071	T72vT0 ribosomal depletion
chr6:3147503-3147503	A	G	+	6,7,3,2	1,1,0,1	4,4,0,4	2,2,4,1	0.00047591	0.0106263	0.316	T72vT0 ribosomal depletion
chr6:3288856-3288856	T	C	-	2,2,2,5	10,2,6,14	0,1,1,4	10,25,16,15	0.0065468	0.047847	0.218	T72vT0, poly-A enrichment
chr6:4035381-4035381	A	G	+	4,3,1,2	6,9,17,10	0,0,0,1	7,13,10,8	1.79875e-06	0.00128687	0.19	T72vT0 ribosomal depletion, mutant A3B
chr6:5148264-5148264	T	C	-	5,1,1,1	10,6,5,5	1,1,0,0	5,8,4,6	0.000730614	0.0148715	0.133	T72vT0 ribosomal depletion
chr6:5256566-5256566	T	C	-	3,3,2,2	9,6,5,6	0,0,0,3	8,5,3,5	0.00145987	0.0254751	0.186	T72vT0 ribosomal depletion
chr6:7181183-7181183	C	T	+	5,13,7,6	107101102101	0,1,1,3	117109110113	2.05759e-07	1.19773e-05	0.059	T72vT0 ribosomal depletion
chr6:7581058-7581058	C	T	+	15,12,17,10	241210205186	0,0,1,0	675623653477	0	0	0.06	T72vT0 ribosomal depletion
chr6:7581058-7581058	C	T	+	17,15,15,14	330295275311	0,0,0,0	819876798796	0	0	0.048	T72vT0, poly-A enrichment
chr6:10730969-10730969	C	T	+	15,15,12,11	150179154145	0,0,0,0	200232192210	1.11022e-16	1.61417e-14	0.078	T72vT0 ribosomal depletion
chr6:10730969-10730969	C	T	+	14,15,17,18	253187236239	0,0,0,0	476475476527	0	0	0.066	T72vT0, poly-A enrichment
chr6:10733000-10733000	A	G	+	2,3,0,2	6,6,5,3	0,0,0,0	6,12,4,7	0.00102543	0.0192459	0.246	T72vT0 ribosomal depletion
chr6:10755693-10755693	A	G	+	5,3,2,2	7,9,11,9	0,0,2,1	1,6,7,5	0.000812098	0.0161346	0.153	T72vT0 ribosomal depletion
chr6:12292121-12292121	G	A	-	3,3,2,3	7,24,14,14	0,0,0,0	120166169138	4.18013e-06	0.000109526	0.178	T24vT0, poly-A enrichment
chr6:12296902-12296902	G	A	-	5,19,19,18	215406361295	0,0,0,0	247381904577	1.55431e-15	1.43425e-13	0.044	T24vT0, poly-A enrichment
chr6:12300468-12300468	G	A	-	15,28,36,30	293538547556	0,1,0,0	236487523472	0	0	0.052	T24vT0, poly-A enrichment
chr6:12300468-12300468	G	A	-	40,26,25,34	191185177187	0,0,0,0	390418438387	0	0	0.143	T72vT0 ribosomal depletion
chr6:12311671-12311671	T	C	-	8,20,14,24	210404321339	2,11,8,17	207346437372	0.00310608	0.0343341	0.022	T24vT0, poly-A enrichment
chr6:12311695-12311695	T	C	-	10,22,14,19	174346264260	4,9,4,12	162253326284	0.000329413	0.00502967	0.03	T24vT0, poly-A enrichment
chr6:12752746-12752746	C	T	+	3,9,5,7	8,32,15,16	0,0,0,0	8,16,10,11	8.58966e-10	7.05739e-08	0.262	T72vT0 ribosomal depletion
chr6:12765841-12765841	C	T	+	3,7,5,6	24,43,39,36	0,0,0,0	26,24,24,23	5.66735e-08	3.56185e-06	0.127	T72vT0 ribosomal depletion
chr6:12771995-12771995	C	T	+	23,27,23,39	80,79,71,106	0,0,0,0	54,73,58,62	0	0	0.248	T72vT0 ribosomal depletion
chr6:12780741-12780741	C	A	+	3,5,3,9	118,91,107,117	0,0,0,0	79,51,58,67	0.000126457	0.00354958	0.044	T72vT0 ribosomal depletion
chr6:12787270-12787270	C	T	+	4,9,10,16	24,42,44,53	0,0,0,0	23,31,21,30	3.9253e-12	4.06044e-10	0.184	T72vT0 ribosomal depletion
chr6:12795406-12795406	C	T	+	9,11,8,7	39,49,49,43	0,0,0,0	29,40,35,32	1.00182e-11	1.00024e-09	0.163	T72vT0 ribosomal depletion
chr6:12874772-12874772	C	T	+	4,7,7,5	45,47,37,45	0,0,0,0	35,38,26,30	2.40131e-08	1.57574e-06	0.118	T72vT0 ribosomal depletion
chr6:12892037-12892037	C	T	+	1,5,3,2	10,26,19,13	0,0,0,0	7,12,7,14	3.26272e-05	0.00113494	0.13	T72vT0 ribosomal depletion
chr6:17436788-17436788	A	G	+	0,1,4,2	4,5,10,6	0,0,0,0	2,9,10,7	0.00237225	0.0369968	0.176	T72vT0 ribosomal depletion
chr6:17465241-17465241	A	G	+	3,7,5,3	44,48,39,45	1,3,0,0	36,45,40,38	0.000179058	0.00472347	0.069	T72vT0 ribosomal depletion
chr6:17467734-17467734	A	G	+	2,2,2,1	9,7,3,8	0,0,0,0	9,9,10,2	0.00227197	0.0359121	0.229	T72vT0 ribosomal depletion
chr6:17512135-17512135	A	G	+	8,10,7,9	1,0,0,2	2,13,7,5	3,0,4,2	0.000354155	0.00535608	0.239	T24vT0, poly-A enrichment
chr6:17518912-17518912	A	G	+	2,4,4,3	26,24,20,15	0,1,1,0	26,25,26,16	3.98896e-05	0.00135034	0.118	T72vT0 ribosomal depletion
chr6:17811973-17811973	T	C	-	1,5,2,0	8,7,1,6	0,0,1,0	3,6,7,7	0.00128342	0.0229807	0.267	T72vT0 ribosomal depletion
chr6:24706903-24706903	T	C	-	5,0,0,5	8,9,7,7	1,1,0,0	7,14,20,8	0.000293966	0.00716187	0.152	T72vT0 ribosomal depletion
chr6:24708896-24708896	G	A	-	1,1,6,5	22,65,70,75	0,0,0,0	567971869995	0.00122412	0.0155258	0.05	T24vT0, poly-A enrichment
chr6:24708896-24708896	G	A	-	11,15,4,14	36,47,37,40	0,1,0,1	567549600422	0	0	0.207	T72vT0 ribosomal depletion
chr6:24708896-24708896	G	A	-	4,9,90,11	32,28,418,42	0,0,0,0	567971869995	0	0	0.185	T72vT0, poly-A enrichment
chr6:25976506-25976506	A	G	+	2,5,3,5	3,8,7,6	0,2,0,0	5,6,1,9	2.46203e-06	0.000116109	0.322	T72vT0 ribosomal depletion
chr6:25998715-25998715	A	G	+	7,4,2,5	16,33,28,30	0,0,1,0	10,8,6,11	1.19995e-05	0.000472052	0.12	T72vT0 ribosomal depletion
chr6:25998715-25998715	A	G	+	6,1,4,3	13,10,8,22	1,0,0,2	7,10,9,12	0.000208746	0.00226877	0.148	T72vT0, poly-A enrichment
chr6:27895646-27895646	C	T	+	6,6,1,5	9,18,11,21	0,0,0,0	9,6,8,5	3.44041e-08	2.2062e-06	0.231	T72vT0 ribosomal depletion
chr6:28900829-28900829	T	C	-	3,1,2,3	19,6,13,13	0,0,0,1	7,3,9,9	0.000369443	0.00869197	0.125	T72vT0 ribosomal depletion
chr6:30068686-30068686	C	T	+	8,7,11,13	326371379391	0,0,0,0	441559516533	3.08137e-05	0.000382793	0.026	T72vT0, poly-A enrichment
chr6:31199453-31199453	A	G	+	5,0,4,2	12,15,9,20	0,1,0,1	5,16,16,7	0.000105262	0.00191475	0.127	T24vT0, poly-A enrichment
chr6:31777618-31777618	G	A	-	18,4,4,9	306216193219	0,0,0,0	321196256205	4.51576e-07	1.48205e-05	0.033	T24vT0, poly-A enrichment
chr6:31777618-31777618	G	A	-	22,18,13,8	228215213202	0,0,0,6	259211229226	1.63092e-13	1.85092e-11	0.059	T72vT0 ribosomal depletion
chr6:31777618-31777618	G	A	-	20,9,11,14	170193188192	0,0,0,0	321196256205	3.33067e-16	9.64089e-15	0.068	T72vT0, poly-A enrichment
chr6:31830830-31830830	A	G	+	4,4,1,1	5,5,5,8	1,0,0,0	6,3,4,8	1.38768e-06	6.91647e-05	0.256	T72vT0 ribosomal depletion
chr6:31840787-31840787	A	G	+	3,5,0,4	21,16,13,17	0,0,0,0	7,6,6,11	6.70544e-06	0.000279467	0.138	T72vT0 ribosomal depletion
chr6:31841084-31841084	A	G	+	4,2,2,2	32,17,22,21	0,0,0,0	8,11,19,16	0.000401382	0.00931833	0.097	T72vT0 ribosomal depletion
chr6:31858286-31858286	T	C	-	3,1,3,3	4,2,5,3	1,0,0,1	0,7,8,6	7.5463e-05	0.0111632	0.124	T72vT0 ribosomal depletion, mutant A3B
chr6:31913181-31913181	A	G	+	3,0,1,3	4,7,5,9	0,0,0,0	6,7,5,4	0.00222602	0.0354165	0.211	T72vT0 ribosomal depletion
chr6:33260496-33260496	A	G	+	0,5,2,2	8,9,4,9	0,1,0,0	8,3,13,14	0.000112603	0.00201956	0.156	T24vT0, poly-A enrichment
chr6:34332013-34332013	T	C	-	1,1,3,5	11,8,10,8	1,0,0,1	6,12,7,16	0.000147913	0.00404884	0.152	T72vT0 ribosomal depletion
chr6:34421940-34421940	G	A	-	3,3,3,3	19,21,34,26	0,0,0,0	22,54,52,61	1.50229e-05	0.000339187	0.111	T24vT0, poly-A enrichment
chr6:34421940-34421940	G	A	-	2,1,1,3	12,15,7,17	0,0,0,0	22,54,52,61	0.00418086	0.0335611	0.12	T72vT0, poly-A enrichment
chr6:34587831-34587831	G	A	-	12,5,4,8	183225203209	0,0,1,0	337386312350	7.74729e-06	0.000104172	0.034	T72vT0, poly-A enrichment
chr6:34853200-34853200	A	G	+	3,1,8,4	15,18,23,18	1,1,1,1	18,6,22,19	0.000667254	0.0138499	0.093	T72vT0 ribosomal depletion
chr6:34909878-34909878	C	T	+	4,3,2,0	20,20,9,14	0,0,0,0	12,18,9,21	0.000552352	0.0119361	0.12	T72vT0 ribosomal depletion
chr6:35578685-35578685	T	C	-	0,3,4,4	8,12,10,6	0,2,0,2	7,8,15,15	0.00183974	0.0305655	0.142	T72vT0 ribosomal depletion
chr6:35648546-35648546	T	C	-	4,1,1,3	11,8,12,21	0,1,0,1	15,9,8,11	0.00111508	0.0205495	0.099	T72vT0 ribosomal depletion
chr6:36093370-36093370	C	T	+	5,4,5,4	14,14,18,11	0,0,0,0	19,13,16,11	1.95382e-09	1.5296e-07	0.242	T72vT0 ribosomal depletion
chr6:36544627-36544627	T	C	-	0,9,2,5	6,16,11,20	0,1,2,1	2,12,9,13	0.00305864	0.0339274	0.096	T24vT0, poly-A enrichment
chr6:36544627-36544627	T	C	-	4,2,2,2	12,11,13,15	0,0,0,4	20,16,22,25	0.00195589	0.0319401	0.129	T72vT0 ribosomal depletion
chr6:38417523-38417523	T	C	-	2,3,0,4	4,3,6,3	0,0,0,1	9,3,7,6	3.33212e-06	0.00015236	0.315	T72vT0 ribosomal depletion
chr6:38430639-38430639	T	C	-	2,4,1,2	9,8,4,15	0,0,3,0	8,11,11,7	0.000897906	0.0431241	0.155	T72vT0 ribosomal depletion, mutant A3B
chr6:38640745-38640745	A	G	+	4,1,1,1	4,5,3,9	0,1,0,1	3,3,6,9	0.0010252	0.0464545	0.167	T72vT0 ribosomal depletion, mutant A3B
chr6:38643909-38643909	A	G	+	4,2,1,4	3,4,6,4	0,1,1,0	6,5,6,6	4.05418e-06	0.000181791	0.31	T72vT0 ribosomal depletion
chr6:41843657-41843657	T	C	-	2,3,1,1	4,10,4,7	0,0,1,0	9,4,5,5	0.00184789	0.0305862	0.181	T72vT0 ribosomal depletion
chr6:42028106-42028106	T	C	-	4,3,6,2	11,13,4,6	0,0,2,0	7,3,3,8	3.08791e-05	0.00107889	0.226	T72vT0 ribosomal depletion
chr6:42762680-42762680	A	G	+	1,4,1,2	13,17,8,9	0,0,0,0	12,8,9,12	0.00113778	0.0207857	0.139	T72vT0 ribosomal depletion
chr6:43136759-43136759	A	G	+	0,3,5,0	5,11,16,12	0,1,0,0	1,18,9,12	0.00192287	0.0228413	0.1	T24vT0, poly-A enrichment
chr6:43188540-43188540	C	T	+	2,2,2,4	41,40,41,38	0,0,0,0	27,90,67,99	0.00499047	0.038686	0.059	T72vT0, poly-A enrichment
chr6:43534951-43534951	T	C	-	2,6,3,4	17,13,15,14	0,0,0,0	11,11,7,9	1.12653e-07	6.76989e-06	0.202	T72vT0 ribosomal depletion
chr6:43534951-43534951	T	C	-	0,0,4,5	10,12,8,12	0,0,0,0	10,14,10,8	8.53661e-05	0.0119701	0.157	T72vT0 ribosomal depletion, mutant A3B
chr6:53268995-53268995	G	A	-	22,18,28,15	117115145115	0,0,0,0	196203186176	0	0	0.143	T72vT0 ribosomal depletion
chr6:53268995-53268995	G	A	-	26,28,30,30	153163196162	0,0,0,0	438581517515	0	0	0.145	T72vT0, poly-A enrichment
chr6:75109164-75109164	G	A	-	0,1,61,1	4,6,134,1	0,0,0,2	140236233231	8.76453e-08	1.45481e-06	0.237	T72vT0, poly-A enrichment
chr6:75612850-75612850	A	G	+	1,5,1,3	4,2,2,6	2,0,1,0	6,5,3,6	4.69418e-05	0.0089206	0.27	T72vT0 ribosomal depletion, mutant A3B
chr6:75662387-75662387	A	G	+	1,1,4,3	4,4,2,6	0,0,0,2	10,6,5,2	0.000196791	0.00513545	0.225	T72vT0 ribosomal depletion
chr6:82366480-82366480	C	T	+	24,28,16,15	422552640607	0,0,0,0	334551521527	4.72955e-14	3.81178e-12	0.038	T24vT0, poly-A enrichment
chr6:82366480-82366480	C	T	+	63,65,55,54	252271260258	0,0,0,0	165201171212	0	0	0.185	T72vT0 ribosomal depletion
chr6:82366480-82366480	C	T	+	91,90,69,102	354397426403	0,0,0,0	334551521527	0	0	0.183	T72vT0, poly-A enrichment
chr6:106197287-106197287	T	C	-	0,2,4,2	12,8,10,19	0,1,0,0	7,11,12,6	0.00177009	0.0296582	0.124	T72vT0 ribosomal depletion
chr6:107947529-107947529	T	C	-	2,5,2,4	18,13,11,13	0,0,2,0	12,6,9,9	7.6674e-05	0.00235966	0.146	T72vT0 ribosomal depletion
chr6:108601219-108601219	A	G	+	3,3,3,1	8,7,7,12	0,0,2,0	5,4,2,13	0.000668267	0.0138618	0.112	T72vT0 ribosomal depletion
chr6:110787641-110787641	T	C	-	5,1,2,3	3,7,5,1	0,1,0,0	5,9,6,4	6.59567e-07	3.47402e-05	0.421	T72vT0 ribosomal depletion
chr6:110787641-110787641	T	C	-	2,1,3,3	6,4,9,4	1,2,0,0	8,12,7,9	0.000147134	0.0156677	0.219	T72vT0 ribosomal depletion, mutant A3B
chr6:119178352-119178352	T	C	-	3,1,6,2	19,28,39,25	4,0,0,0	34,37,33,40	0.00155822	0.0190426	0.068	T24vT0, poly-A enrichment
chr6:119178352-119178352	T	C	-	3,6,2,2	40,24,29,34	4,0,0,0	34,37,33,40	0.00142157	0.0128708	0.071	T72vT0, poly-A enrichment
chr6:124968879-124968879	C	T	+	3,3,3,3	2,17,9,12	0,0,0,0	7,14,12,18	2.6408e-07	9.08862e-06	0.3	T24vT0, poly-A enrichment
chr6:125171904-125171904	C	T	+	3,3,3,6	12,7,5,20	0,1,0,0	8,7,8,10	5.2033e-07	2.81585e-05	0.245	T72vT0 ribosomal depletion
chr6:130839843-130839843	G	A	-	16,16,14,12	66,73,63,53	1,1,1,0	85,95,67,62	0	0	0.176	T24vT0, poly-A enrichment
chr6:130839843-130839843	G	A	-	8,8,3,4	10,17,14,9	0,0,0,6	25,22,35,33	2.0977e-07	1.21883e-05	0.274	T72vT0 ribosomal depletion
chr6:130839843-130839843	G	A	-	5,9,3,6	32,28,32,47	1,1,1,0	85,95,67,62	6.36677e-10	1.28561e-08	0.135	T72vT0, poly-A enrichment
chr6:142779186-142779186	T	C	-	2,1,1,4	5,5,4,4	1,0,0,0	4,5,3,9	6.33335e-05	0.00202239	0.238	T72vT0 ribosomal depletion
chr6:143486927-143486927	A	G	+	0,4,2,2	9,8,5,9	1,0,0,0	3,7,5,6	0.000572007	0.00812939	0.138	T24vT0, poly-A enrichment
chr6:143487300-143487300	A	G	+	1,2,1,4	7,13,20,8	0,0,0,0	8,4,6,6	0.00146285	0.0180503	0.16	T24vT0, poly-A enrichment
chr6:143487351-143487351	A	G	+	4,1,0,2	2,4,3,5	0,0,0,1	1,8,5,6	0.000992502	0.0187843	0.252	T72vT0 ribosomal depletion
chr6:149383835-149383835	A	G	+	1,0,4,4	5,7,2,7	0,1,0,0	11,11,7,4	7.67357e-05	0.00235966	0.278	T72vT0 ribosomal depletion
chr6:149862382-149862382	G	A	-	3,0,4,3	34,33,38,43	0,0,0,0	4,10,5,16	0.00455519	0.036003	0.06	T72vT0, poly-A enrichment
chr6:151401487-151401487	C	T	+	3,3,3,1	25,27,42,55	0,0,0,0	7,22,29,28	0.00475022	0.0481603	0.073	T24vT0, poly-A enrichment
chr6:151401487-151401487	C	T	+	4,1,2,1	18,14,18,17	0,0,0,0	7,22,29,28	0.00610881	0.0451514	0.101	T72vT0, poly-A enrichment
chr6:151813301-151813301	C	T	+	3,3,3,3	4,1,8,7	0,0,0,0	10,11,5,5	5.19998e-09	2.41666e-07	0.438	T24vT0, poly-A enrichment
chr6:151915063-151915063	C	T	+	9,12,8,10	20,17,18,22	0,0,0,0	16,22,22,23	1.33227e-15	1.81961e-13	0.336	T72vT0 ribosomal depletion
chr6:151940680-151940680	C	T	+	1,8,9,8	7,15,18,22	0,0,0,0	13,13,7,15	1.33114e-10	1.21732e-08	0.268	T72vT0 ribosomal depletion
chr6:151958972-151958972	C	T	+	44,44,46,42	119,88,100,113	1,2,2,15	77,81,97,97	0	0	0.25	T72vT0 ribosomal depletion
chr6:152087156-152087156	C	T	+	5,8,9,10	14,38,28,43	0,0,0,0	29,54,48,53	1.18794e-14	1.00848e-12	0.217	T24vT0, poly-A enrichment
chr6:152087156-152087156	C	T	+	4,3,4,6	23,47,43,38	0,0,0,3	26,40,36,16	0.00014828	0.00405042	0.068	T72vT0 ribosomal depletion
chr6:152087156-152087156	C	T	+	4,6,5,8	29,39,32,46	0,0,0,0	29,54,48,53	5.42812e-10	1.09985e-08	0.134	T72vT0, poly-A enrichment
chr6:154738064-154738064	A	G	+	1,4,3,1	5,5,5,5	2,0,0,1	6,6,6,5	0.00113403	0.0207291	0.184	T72vT0 ribosomal depletion
chr6:158272436-158272436	A	G	+	3,3,3,0	15,19,17,19	0,0,1,0	17,16,6,8	0.000484155	0.0307944	0.078	T72vT0 ribosomal depletion, mutant A3B
chr6:167039953-167039953	C	T	+	35,28,26,17	166194161184	1,3,0,1	158182181182	0	0	0.124	T24vT0, poly-A enrichment
chr6:167039953-167039953	C	T	+	12,10,10,9	66,62,64,61	0,0,0,3	76,82,59,56	3.56182e-12	3.69656e-10	0.126	T72vT0 ribosomal depletion
chr6:167039953-167039953	C	T	+	24,27,15,31	114112131140	1,3,0,1	158182181182	0	0	0.156	T72vT0, poly-A enrichment
chr6:169771927-169771927	A	G	+	0,2,3,3	11,14,9,12	0,0,0,0	9,8,10,7	0.00125617	0.0225953	0.144	T72vT0 ribosomal depletion
chr6:170391280-170391280	A	G	+	1,2,6,6	10,17,17,19	0,0,1,1	4,9,6,6	7.68431e-05	0.00143478	0.103	T24vT0, poly-A enrichment
chr6:170391280-170391280	A	G	+	7,2,4,7	12,11,9,19	0,0,1,1	4,9,6,6	5.1956e-06	7.18338e-05	0.203	T72vT0, poly-A enrichment
chr6:170393057-170393057	A	G	+	5,5,7,6	17,33,40,36	1,1,0,0	9,17,23,12	3.88588e-06	0.000103046	0.124	T24vT0, poly-A enrichment
chr7:745675-745675	A	G	+	3,4,1,3	9,20,18,19	0,0,0,0	7,9,13,25	1.75428e-05	0.000658117	0.151	T72vT0 ribosomal depletion
chr7:846694-846694	A	G	+	1,3,2,3	9,5,6,13	1,0,0,2	11,11,10,9	0.000507383	0.0314152	0.162	T72vT0 ribosomal depletion, mutant A3B
chr7:873895-873895	C	T	+	13,29,19,19	430735808822	0,1,0,0	466884809854	6.02548e-11	3.61927e-09	0.028	T24vT0, poly-A enrichment
chr7:873895-873895	C	T	+	17,22,29,26	134164173168	0,0,0,0	214232227202	0	0	0.127	T72vT0 ribosomal depletion
chr7:983893-983893	T	C	-	20,19,20,21	83,69,85,81	2,2,2,4	13,16,21,38	0.00209438	0.0336616	0.095	T72vT0 ribosomal depletion
chr7:1543625-1543625	G	A	-	17,19,25,21	190236242211	0,0,0,0	279234221225	0	0	0.085	T72vT0 ribosomal depletion
chr7:1544265-1544265	G	A	-	4,11,14,14	244547454384	0,0,0,0	273442423467	1.15941e-05	0.000271395	0.025	T24vT0, poly-A enrichment
chr7:1544265-1544265	G	A	-	31,20,26,23	315292338343	0,0,0,0	464358386378	0	0	0.072	T72vT0 ribosomal depletion
chr7:1544265-1544265	G	A	-	24,23,15,26	352359341312	0,0,0,0	273442423467	0	0	0.061	T72vT0, poly-A enrichment
chr7:2253882-2253882	T	C	-	5,4,5,6	104,125,106,84	0,2,0,1	41,65,117,89	0.00040125	0.00409331	0.037	T72vT0, poly-A enrichment
chr7:2287699-2287699	T	C	-	2,1,1,4	4,6,7,8	0,0,0,0	3,5,8,6	0.000116435	0.00330354	0.234	T72vT0 ribosomal depletion
chr7:2434482-2434482	A	G	+	3,1,2,1	14,3,12,6	0,1,0,0	7,5,7,8	0.00123263	0.0222734	0.136	T72vT0 ribosomal depletion
chr7:2446528-2446528	C	T	+	1,5,5,1	18,15,15,18	0,0,0,0	20,30,35,34	1.98377e-06	2.88531e-05	0.151	T72vT0, poly-A enrichment
chr7:2559950-2559950	A	G	+	3,1,3,2	10,2,3,2	1,1,0,0	17,5,2,2	3.39248e-05	0.000701295	0.335	T24vT0, poly-A enrichment
chr7:2711829-2711829	A	G	+	3,2,3,4	10,11,9,7	0,1,2,0	9,7,6,3	0.000810128	0.00777829	0.156	T72vT0, poly-A enrichment
chr7:2719235-2719235	C	T	+	3,6,3,5	28,119,85,85	0,0,0,0	25,58,67,64	0.000148935	0.0025909	0.059	T24vT0, poly-A enrichment
chr7:2719235-2719235	C	T	+	31,52,52,44	136137164123	0,0,0,0	101,98,89,98	0	0	0.241	T72vT0 ribosomal depletion
chr7:2719235-2719235	C	T	+	27,19,27,28	98,93,89,76	0,0,0,0	25,58,67,64	0	0	0.222	T72vT0, poly-A enrichment
chr7:4705228-4705228	A	G	+	2,5,1,2	11,3,3,9	2,1,0,0	6,11,13,9	4.85941e-05	0.00898564	0.219	T72vT0 ribosomal depletion, mutant A3B
chr7:4793633-4793633	A	G	+	8,15,6,9	67,61,57,77	3,2,3,1	82,64,73,66	1.22346e-06	6.17602e-05	0.096	T72vT0 ribosomal depletion
chr7:4793633-4793633	A	G	+	16,8,7,4	55,49,32,43	1,1,0,0	27,47,51,51	7.09319e-11	1.52673e-09	0.143	T72vT0, poly-A enrichment
chr7:4991897-4991897	C	T	+	6,0,7,2	39,50,60,43	0,0,0,1	41,42,31,44	8.2127e-05	0.00249385	0.065	T72vT0 ribosomal depletion
chr7:5005805-5005805	A	G	+	0,3,4,2	11,14,8,8	0,0,0,0	7,5,3,6	0.000113064	0.00322529	0.177	T72vT0 ribosomal depletion
chr7:5434777-5434777	A	G	+	2,3,3,2	2,21,8,6	0,2,0,0	1,9,15,12	1.8652e-05	0.000406704	0.241	T24vT0, poly-A enrichment
chr7:5463402-5463402	T	C	-	5,3,3,1	8,16,12,21	2,0,1,0	8,6,11,9	0.000791613	0.0158272	0.126	T72vT0 ribosomal depletion
chr7:5466960-5466960	T	C	-	5,1,1,1	10,5,15,12	0,0,0,0	8,10,7,7	0.00103394	0.0193711	0.16	T72vT0 ribosomal depletion
chr7:5478681-5478681	G	A	-	5,10,16,14	61139157154	0,1,0,0	61110110125	1.86401e-11	1.18681e-09	0.077	T24vT0, poly-A enrichment
chr7:5478681-5478681	G	A	-	12,6,8,2	72,52,45,55	0,0,0,9	89,67,94,97	4.58895e-06	0.000202491	0.087	T72vT0 ribosomal depletion
chr7:5478681-5478681	G	A	-	6,7,7,8	40,43,42,28	0,1,0,0	61110110125	1.9762e-14	5.42623e-13	0.157	T72vT0, poly-A enrichment
chr7:5480032-5480032	T	C	-	15,8,6,5	180164190176	6,1,6,6	283221246253	0.00112245	0.0205999	0.027	T72vT0 ribosomal depletion
chr7:5612432-5612432	T	C	-	2,3,1,3	12,2,4,7	0,0,0,1	4,7,4,5	1.20371e-05	0.000472938	0.269	T72vT0 ribosomal depletion
chr7:5612465-5612465	T	C	-	5,2,1,3	10,1,4,4	1,0,0,0	5,7,3,4	4.36473e-07	2.41169e-05	0.365	T72vT0 ribosomal depletion
chr7:5622561-5622561	T	C	-	12,25,27,15	23,70,57,63	3,20,9,11	24,61,74,65	0.00440395	0.0454456	0.127	T24vT0, poly-A enrichment
chr7:5622561-5622561	T	C	-	23,21,33,14	28,43,40,28	5,12,7,5	82,59,48,48	1.06718e-11	1.06213e-09	0.279	T72vT0 ribosomal depletion
chr7:5622561-5622561	T	C	-	26,9,22,26	28,34,24,33	3,20,9,11	24,61,74,65	9.3034e-06	0.000124243	0.25	T72vT0, poly-A enrichment
chr7:5646286-5646286	T	C	-	2,4,5,4	15,14,7,12	1,1,2,0	17,11,10,8	0.000143724	0.0154698	0.175	T72vT0 ribosomal depletion, mutant A3B
chr7:6058192-6058192	T	C	-	2,5,0,2	13,12,20,9	0,0,0,0	19,11,18,9	0.000327813	0.00789504	0.152	T72vT0 ribosomal depletion
chr7:6122528-6122528	A	G	+	2,3,2,2	7,7,2,7	1,0,2,0	12,2,4,5	0.0016617	0.0283082	0.209	T72vT0 ribosomal depletion
chr7:6128181-6128181	A	G	+	3,3,0,2	12,6,12,7	0,0,0,2	12,6,10,6	0.00207079	0.0334186	0.126	T72vT0 ribosomal depletion
chr7:6130119-6130119	A	G	+	9,2,2,3	16,7,8,14	2,0,2,0	9,10,13,18	0.000179038	0.00472347	0.161	T72vT0 ribosomal depletion
chr7:6427700-6427700	T	C	-	6,1,3,5	11,15,12,11	0,0,2,2	12,12,13,8	0.000234198	0.0208594	0.149	T72vT0 ribosomal depletion, mutant A3B
chr7:6597388-6597388	A	G	+	3,2,3,0	16,7,5,9	2,0,0,0	7,13,5,5	0.00267194	0.0405483	0.133	T72vT0 ribosomal depletion
chr7:6598985-6598985	A	G	+	4,7,3,2	1,3,2,7	2,2,0,0	3,5,7,2	0.000363917	0.00861335	0.409	T72vT0 ribosomal depletion
chr7:17837339-17837339	T	C	-	0,3,2,3	10,8,11,15	0,1,0,1	11,7,6,10	0.00278225	0.0418717	0.094	T72vT0 ribosomal depletion
chr7:22822783-22822783	G	A	-	17,29,26,26	107010311010976	2,0,0,1	1036116710961090	1.33962e-09	2.66833e-08	0.023	T72vT0, poly-A enrichment
chr7:23188565-23188565	A	G	+	4,0,4,4	17,55,43,34	0,0,0,0	9,34,50,47	0.00030457	0.00475293	0.095	T24vT0, poly-A enrichment
chr7:23304723-23304723	A	G	+	3,1,2,2	16,15,19,23	0,1,0,0	13,25,29,37	0.00633922	0.0465616	0.089	T72vT0, poly-A enrichment
chr7:23511627-23511627	T	C	-	5,2,1,1	19,16,18,28	0,1,0,0	14,22,13,14	0.00188132	0.0309789	0.091	T72vT0 ribosomal depletion
chr7:23518891-23518891	T	C	-	1,7,0,1	9,4,1,6	0,0,0,0	3,6,7,5	0.000555513	0.0119798	0.22	T72vT0 ribosomal depletion
chr7:23525239-23525239	G	A	-	3,1,3,3	32,15,42,47	0,0,0,0	48,73,115,92	0.00203173	0.017872	0.069	T72vT0, poly-A enrichment
chr7:26201849-26201849	A	G	+	18,6,16,12	110,118,106,75	2,2,0,3	86,71,78,70	1.91899e-08	1.29092e-06	0.092	T72vT0 ribosomal depletion
chr7:26201849-26201849	A	G	+	19,15,30,20	148204146133	2,4,3,6	55,95,97,90	5.28902e-06	7.29537e-05	0.079	T72vT0, poly-A enrichment
chr7:26781938-26781938	G	A	-	3,3,3,3	6,16,22,16	0,0,0,0	11,8,19,17	1.32599e-06	3.92678e-05	0.192	T24vT0, poly-A enrichment
chr7:26781938-26781938	G	A	-	11,12,11,11	73,74,80,98	0,0,0,0	27,27,35,28	9.2434e-10	7.51622e-08	0.123	T72vT0 ribosomal depletion
chr7:26781938-26781938	G	A	-	4,5,4,4	36,40,50,49	0,0,0,0	11,8,19,17	2.11281e-05	0.000270476	0.09	T72vT0, poly-A enrichment
chr7:27558425-27558425	T	C	-	3,1,2,3	7,8,5,4	1,0,0,0	6,9,19,9	1.5582e-05	0.000598069	0.246	T72vT0 ribosomal depletion
chr7:27654946-27654946	T	C	-	1,3,2,2	3,9,2,7	0,0,0,2	3,9,3,5	0.000504438	0.0111138	0.234	T72vT0 ribosomal depletion
chr7:30435771-30435771	T	C	-	3,1,2,3	3,3,7,5	1,0,1,0	2,5,4,7	0.000115715	0.00328901	0.203	T72vT0 ribosomal depletion
chr7:30577789-30577789	G	A	-	3,1,5,6	78,79,67,87	1,4,0,1	90,78,110,94	0.00646269	0.0472991	0.028	T72vT0, poly-A enrichment
chr7:30615994-30615994	C	T	+	14,10,4,7	217239174193	0,0,0,0	320270311282	1.94373e-08	1.30478e-06	0.04	T72vT0 ribosomal depletion
chr7:30615994-30615994	C	T	+	10,7,39,9	265239770240	0,0,0,0	503618495538	3.10862e-14	8.37903e-13	0.037	T72vT0, poly-A enrichment
chr7:30876351-30876351	A	G	+	5,6,1,4	6,8,10,7	1,0,2,1	12,5,19,11	5.8362e-05	0.00189047	0.271	T72vT0 ribosomal depletion
chr7:30879378-30879378	A	G	+	6,1,8,5	7,4,6,12	0,3,2,1	17,7,6,10	0.00129162	0.0230786	0.222	T72vT0 ribosomal depletion
chr7:30904579-30904579	A	G	+	5,4,1,1	10,4,3,5	0,0,0,1	4,5,5,9	1.51226e-06	7.50186e-05	0.287	T72vT0 ribosomal depletion
chr7:32499102-32499102	A	G	+	5,7,6,9	27,26,13,14	1,1,4,0	16,12,9,26	0.000887895	0.0172707	0.158	T72vT0 ribosomal depletion
chr7:32523010-32523010	A	G	+	6,4,0,2	54,54,55,51	0,0,0,0	39,31,43,41	0.00231495	0.0363367	0.052	T72vT0 ribosomal depletion
chr7:36410670-36410670	C	T	+	2,6,4,4	94,94,98,89	0,0,0,0	737845797774	0.00109588	0.0140959	0.041	T24vT0, poly-A enrichment
chr7:36410670-36410670	C	T	+	6,2,21,2	52,49,255,32	0,0,0,0	737845797774	4.1811e-13	1.06818e-11	0.069	T72vT0, poly-A enrichment
chr7:36441286-36441286	C	T	+	2,2,3,3	12,44,34,32	0,0,0,0	10,33,34,27	0.00172506	0.0208415	0.088	T24vT0, poly-A enrichment
chr7:36452553-36452553	C	T	+	6,5,7,4	62,71,61,63	0,0,0,0	235241232210	1.29341e-09	1.03572e-07	0.079	T72vT0 ribosomal depletion
chr7:36452553-36452553	C	T	+	9,9,25,9	156114333166	0,0,0,0	468822777732	0	0	0.062	T72vT0, poly-A enrichment
chr7:38748240-38748240	G	A	-	0,0,4,3	2,5,5,6	0,0,0,0	1,6,8,9	0.00219837	0.0191656	0.194	T72vT0, poly-A enrichment
chr7:39951389-39951389	A	G	+	4,8,5,1	104,79,137,85	0,1,3,1	143,99,127,104	0.00101969	0.0191724	0.033	T72vT0 ribosomal depletion
chr7:39951389-39951389	A	G	+	6,1,2,2	25,34,25,15	0,0,1,0	26,31,30,35	0.000207165	0.00226229	0.095	T72vT0, poly-A enrichment
chr7:42924733-42924733	G	A	-	5,5,82,6	1261191042100	0,0,1,1	1216168614621580	0	0	0.052	T72vT0, poly-A enrichment
chr7:44071075-44071075	T	C	-	2,6,3,0	4,7,8,7	0,0,0,2	4,3,5,7	4.76052e-05	0.00158433	0.211	T72vT0 ribosomal depletion
chr7:44071903-44071903	T	C	-	6,4,6,1	16,11,7,6	1,1,2,0	7,2,10,7	0.0022659	0.0358342	0.13	T72vT0 ribosomal depletion
chr7:44394955-44394955	G	A	-	3,3,3,3	4,11,10,24	0,0,0,0	6,25,20,30	2.48867e-07	8.70625e-06	0.246	T24vT0, poly-A enrichment
chr7:44400692-44400692	G	A	-	3,3,3,3	11,13,21,29	0,0,0,0	10,19,25,30	6.21158e-06	0.00015461	0.155	T24vT0, poly-A enrichment
chr7:44400692-44400692	G	A	-	16,11,12,12	46,35,41,43	0,0,0,0	54,40,56,45	0	0	0.235	T72vT0 ribosomal depletion
chr7:44400692-44400692	G	A	-	2,1,1,5	13,7,8,15	0,0,0,0	10,19,25,30	6.9876e-05	0.000819544	0.155	T72vT0, poly-A enrichment
chr7:44578570-44578570	G	A	-	22,26,25,26	444733718779	0,0,0,0	401609718666	3.33067e-16	3.11858e-14	0.037	T24vT0, poly-A enrichment
chr7:44578570-44578570	G	A	-	67,59,81,69	387357397322	1,0,1,0	471381410407	0	0	0.158	T72vT0 ribosomal depletion
chr7:44578570-44578570	G	A	-	57,54,76,53	378420430368	0,0,0,0	401609718666	0	0	0.13	T72vT0, poly-A enrichment
chr7:44579394-44579394	C	T	-	51,57,53,39	538493575592	22,81,66,69	6811093926968	0.00433739	0.0346755	0.026	T72vT0, poly-A enrichment
chr7:44769536-44769536	C	T	+	5,8,8,4	119160178187	1,0,0,0	65,99,107,94	0.000128946	0.00228055	0.034	T24vT0, poly-A enrichment
chr7:44769536-44769536	C	T	+	6,10,11,7	105106135115	0,1,0,4	75,87,84,115	1.2391e-06	6.23504e-05	0.057	T72vT0 ribosomal depletion
chr7:44769536-44769536	C	T	+	15,16,12,10	125145138125	1,0,0,0	65,99,107,94	1.78157e-12	4.32584e-11	0.086	T72vT0, poly-A enrichment
chr7:44824891-44824891	T	C	-	1,7,3,1	7,5,0,9	2,0,1,0	5,4,7,8	0.000131776	0.0148408	0.349	T72vT0 ribosomal depletion, mutant A3B
chr7:51131843-51131843	T	C	-	3,3,3,2	17,12,15,14	0,0,0,0	4,10,6,7	2.07679e-05	0.000762238	0.16	T72vT0 ribosomal depletion
chr7:55542754-55542754	T	C	-	3,3,1,2	6,9,4,5	1,1,0,0	5,4,5,5	0.000203421	0.00528182	0.176	T72vT0 ribosomal depletion
chr7:55930691-55930691	A	G	+	1,2,2,2	4,6,2,3	0,1,0,1	7,6,3,8	0.000511693	0.0074213	0.274	T24vT0, poly-A enrichment
chr7:56079724-56079724	C	T	+	15,26,20,15	6459469771108	0,0,1,0	950137313681458	8.01264e-06	0.000196217	0.021	T24vT0, poly-A enrichment
chr7:56079724-56079724	C	T	+	43,46,41,43	346274265304	0,0,0,0	678612614536	0	0	0.128	T72vT0 ribosomal depletion
chr7:56079724-56079724	C	T	+	70,66,78,84	553589617570	0,0,1,0	950137313681458	0	0	0.113	T72vT0, poly-A enrichment
chr7:56096911-56096911	A	G	+	1,2,2,4	9,6,4,11	0,0,2,1	7,5,6,9	0.00243493	0.0376963	0.15	T72vT0 ribosomal depletion
chr7:64604206-64604206	C	T	+	0,2,1,5	14,9,14,12	0,0,0,1	16,8,10,18	0.00192021	0.031507	0.122	T72vT0 ribosomal depletion
chr7:64797964-64797964	A	G	+	5,10,7,7	13,12,13,17	1,0,1,5	12,5,5,17	0.00239569	0.0372154	0.226	T72vT0 ribosomal depletion
chr7:64820798-64820798	A	G	+	5,5,3,3	33,26,24,18	0,0,0,1	18,18,10,30	3.14885e-06	0.000145031	0.129	T72vT0 ribosomal depletion
chr7:64923442-64923442	A	G	+	4,4,7,5	75,79,69,73	0,0,4,1	31,50,44,45	0.00605336	0.0447979	0.037	T72vT0, poly-A enrichment
chr7:65000553-65000553	T	C	-	2,4,5,4	5,6,14,12	0,1,0,2	3,10,11,6	8.64295e-05	0.0015997	0.214	T24vT0, poly-A enrichment
chr7:65975522-65975522	T	C	-	4,3,2,2	8,7,17,19	1,1,2,0	8,38,31,30	0.000341185	0.00354206	0.159	T72vT0, poly-A enrichment
chr7:66084536-66084536	A	G	+	5,1,1,3	14,10,6,15	0,2,0,0	16,10,6,9	8.06828e-05	0.0115498	0.124	T72vT0 ribosomal depletion, mutant A3B
chr7:66100683-66100683	A	G	+	3,0,3,2	5,8,2,4	0,0,0,2	5,5,4,10	7.19534e-05	0.00136347	0.285	T24vT0, poly-A enrichment
chr7:66154041-66154041	A	G	+	5,7,11,5	107108107112	1,1,2,4	108,134,92,128	7.48886e-05	0.00231188	0.043	T72vT0 ribosomal depletion
chr7:66551447-66551447	T	C	-	2,7,1,1	6,8,14,15	0,0,0,2	9,12,8,15	7.9939e-05	0.00244624	0.182	T72vT0 ribosomal depletion
chr7:66653605-66653605	T	C	-	4,1,3,2	15,4,17,12	0,0,0,1	5,10,7,8	8.74773e-05	0.00100788	0.148	T72vT0, poly-A enrichment
chr7:66933214-66933214	A	G	+	2,1,4,2	25,21,26,14	0,0,0,0	17,14,11,18	0.00166432	0.0283374	0.094	T72vT0 ribosomal depletion
chr7:67017112-67017112	A	G	+	3,3,0,3	5,10,4,7	1,0,1,0	5,9,11,5	0.000218008	0.00558873	0.164	T72vT0 ribosomal depletion
chr7:69825300-69825300	A	G	+	3,1,1,4	9,7,1,3	0,0,1,2	6,2,8,6	8.7726e-05	0.0120254	0.271	T72vT0 ribosomal depletion, mutant A3B
chr7:70138997-70138997	A	G	+	7,7,7,11	0,0,0,2	16,12,13,19	5,2,1,3	0.00051177	0.0112518	0.109	T72vT0 ribosomal depletion
chr7:70779826-70779826	A	G	+	9,4,2,2	26,30,19,23	1,2,1,1	29,17,21,23	0.00106951	0.0472847	0.081	T72vT0 ribosomal depletion, mutant A3B
chr7:73475468-73475468	T	C	-	2,2,5,4	6,12,14,12	0,0,0,1	13,8,6,4	4.41799e-06	0.000196044	0.177	T72vT0 ribosomal depletion
chr7:73475477-73475477	T	C	-	2,1,4,2	8,17,16,12	1,0,0,0	11,10,5,6	0.000457721	0.0103163	0.129	T72vT0 ribosomal depletion
chr7:73747992-73747992	A	G	+	5,9,6,7	9,10,10,15	4,7,2,7	31,21,26,29	0.000965335	0.0183804	0.223	T72vT0 ribosomal depletion
chr7:73839025-73839025	T	C	-	3,5,4,8	6,12,10,10	1,1,4,1	11,14,13,14	0.000819172	0.0162605	0.226	T72vT0 ribosomal depletion
chr7:74461951-74461951	A	G	+	3,3,2,5	15,25,25,24	0,0,0,1	16,14,10,17	3.51928e-05	0.00121215	0.116	T72vT0 ribosomal depletion
chr7:74541505-74541505	A	G	+	5,3,2,1	8,6,8,10	2,0,0,1	5,9,4,9	0.000905704	0.0175549	0.156	T72vT0 ribosomal depletion
chr7:74596063-74596063	A	G	+	3,7,2,4	15,14,17,15	0,1,1,0	13,12,8,4	1.63644e-05	0.000623545	0.157	T72vT0 ribosomal depletion
chr7:76052894-76052894	A	G	+	2,1,5,1	13,9,11,13	0,0,0,0	12,8,9,5	0.000164229	0.00439476	0.154	T72vT0 ribosomal depletion
chr7:76052899-76052899	A	G	+	4,3,8,1	10,6,9,12	0,1,0,0	12,8,9,5	2.72695e-07	1.56713e-05	0.264	T72vT0 ribosomal depletion
chr7:76066435-76066435	C	T	+	26,29,45,28	653748901675	0,1,0,0	95411069561044	0	0	0.041	T72vT0, poly-A enrichment
chr7:76345894-76345894	T	C	-	1,4,2,1	4,5,6,11	1,1,0,0	4,7,7,3	0.000849617	0.0167584	0.163	T72vT0 ribosomal depletion
chr7:77549712-77549712	A	G	+	1,5,1,4	17,33,22,26	1,0,0,0	17,16,30,29	0.000219446	0.00560156	0.077	T72vT0 ribosomal depletion
chr7:77571810-77571810	A	G	+	2,0,4,2	8,13,12,14	0,1,1,0	15,10,9,21	0.00100428	0.0460703	0.096	T72vT0 ribosomal depletion, mutant A3B
chr7:77622091-77622091	A	G	+	2,1,3,1	7,4,5,6	1,0,0,0	5,7,6,5	0.000436422	0.0291953	0.193	T72vT0 ribosomal depletion, mutant A3B
chr7:80872560-80872560	T	C	-	9,2,3,9	64,50,39,45	0,0,1,0	10,12,11,9	3.0066e-05	0.00105398	0.079	T72vT0 ribosomal depletion
chr7:80875138-80875138	C	T	-	1,4,3,5	18,26,26,19	1,1,0,0	7,4,4,4	0.00138984	0.0245243	0.043	T72vT0 ribosomal depletion
chr7:87153401-87153401	C	T	+	3,3,3,3	16,29,24,31	0,0,0,0	15,27,24,36	2.67771e-05	0.000564536	0.113	T24vT0, poly-A enrichment
chr7:87153401-87153401	C	T	+	3,6,6,6	24,35,25,22	0,0,0,0	31,30,23,32	1.60313e-09	1.26764e-07	0.166	T72vT0 ribosomal depletion
chr7:87153401-87153401	C	T	+	2,2,2,2	15,12,8,9	0,0,0,0	15,27,24,36	0.000160841	0.00178996	0.161	T72vT0, poly-A enrichment
chr7:92456565-92456565	C	T	+	4,2,4,4	49,37,40,45	0,0,0,0	56,37,59,49	3.44182e-05	0.00118807	0.075	T72vT0 ribosomal depletion
chr7:92456565-92456565	C	T	+	2,3,4,5	49,51,69,53	0,0,0,0	56,108,75,86	0.000176567	0.00195757	0.059	T72vT0, poly-A enrichment
chr7:94666548-94666548	C	T	+	9,6,7,3	222225183215	0,0,0,2	104,144,137,89	0.00142171	0.0249472	0.023	T72vT0 ribosomal depletion
chr7:98192947-98192947	C	T	+	7,1,3,3	51,59,49,52	0,0,0,2	49,62,53,50	0.000424375	0.00970606	0.053	T72vT0 ribosomal depletion
chr7:98263738-98263738	A	G	+	0,4,3,1	19,13,8,6	0,0,0,0	8,15,8,10	0.00140551	0.0247316	0.163	T72vT0 ribosomal depletion
chr7:98265427-98265427	A	G	+	0,3,3,4	3,5,7,10	0,1,2,0	8,2,9,12	0.000851611	0.0167822	0.111	T72vT0 ribosomal depletion
chr7:99019769-99019769	A	G	+	4,2,3,0	9,9,13,9	0,0,1,0	12,6,13,4	0.000173982	0.00460884	0.151	T72vT0 ribosomal depletion
chr7:99068546-99068546	T	C	-	2,5,2,3	5,2,5,7	0,0,0,0	6,3,5,6	7.22904e-09	5.20722e-07	0.396	T72vT0 ribosomal depletion
chr7:99446286-99446286	T	C	-	2,3,1,4	3,2,12,6	0,0,1,1	4,7,5,7	1.43615e-05	0.000555275	0.296	T72vT0 ribosomal depletion
chr7:99461641-99461641	T	C	-	5,0,1,2	8,11,8,3	0,0,0,1	10,2,5,9	0.00077041	0.0154425	0.199	T72vT0 ribosomal depletion
chr7:99519371-99519371	A	G	+	7,6,1,2	1,2,5,7	1,0,0,0	5,3,7,6	1.51809e-07	9.01991e-06	0.462	T72vT0 ribosomal depletion
chr7:99969217-99969217	T	C	-	4,1,4,2	5,7,10,3	1,0,0,1	0,8,7,5	0.00122668	0.0113691	0.022	T72vT0, poly-A enrichment
chr7:100052220-100052220	A	G	+	4,2,3,4	8,14,5,5	2,0,0,1	5,11,4,5	0.000218048	0.00558873	0.206	T72vT0 ribosomal depletion
chr7:101206165-101206165	G	A	-	5,4,6,3	134146125130	0,0,0,0	131136125148	0.00284635	0.0239959	0.033	T72vT0, poly-A enrichment
chr7:101864254-101864254	A	G	+	3,1,1,3	17,12,12,6	0,0,1,0	12,12,9,8	0.00150695	0.0261519	0.134	T72vT0 ribosomal depletion
chr7:101916207-101916207	C	T	+	5,5,2,4	76,85,69,74	0,0,0,0	64,87,73,78	0.000188075	0.00208122	0.049	T72vT0, poly-A enrichment
chr7:101990087-101990087	A	G	+	4,2,1,3	12,8,10,3	0,2,0,0	7,3,10,3	0.000490898	0.0109069	0.16	T72vT0 ribosomal depletion
chr7:102005571-102005571	A	G	+	2,3,2,0	7,6,4,13	0,0,0,0	11,6,6,7	0.00286466	0.0427531	0.222	T72vT0 ribosomal depletion
chr7:102139554-102139554	A	G	+	3,0,4,1	21,10,19,6	0,0,0,1	4,4,2,18	0.00278876	0.0419178	0.097	T72vT0 ribosomal depletion
chr7:102141646-102141646	A	G	+	1,5,0,2	6,3,2,14	0,0,0,0	3,1,8,12	0.000861789	0.0168879	0.223	T72vT0 ribosomal depletion
chr7:102163230-102163230	A	G	+	3,2,1,1	4,6,4,7	0,0,0,2	5,5,4,4	0.000966351	0.0449764	0.168	T72vT0 ribosomal depletion, mutant A3B
chr7:102283104-102283104	C	T	+	2,4,5,3	40,36,48,52	0,0,0,0	42,67,53,54	3.92018e-05	0.000478898	0.074	T72vT0, poly-A enrichment
chr7:102380029-102380029	A	G	+	0,3,3,2	6,18,3,10	0,0,0,0	6,5,13,11	0.00101895	0.0132132	0.202	T24vT0, poly-A enrichment
chr7:103359042-103359042	A	G	+	1,2,6,3	6,15,7,10	0,1,0,2	10,10,10,9	0.000164084	0.00439461	0.17	T72vT0 ribosomal depletion
chr7:105028566-105028566	A	G	+	5,0,2,2	8,6,6,2	0,1,0,2	6,7,2,5	0.000706198	0.014515	0.181	T72vT0 ribosomal depletion
chr7:105052590-105052590	A	G	+	1,2,2,2	6,7,9,6	0,0,0,0	8,6,4,11	0.00181186	0.0301818	0.199	T72vT0 ribosomal depletion
chr7:105339713-105339713	T	C	-	1,0,2,4	6,10,4,2	0,0,1,1	5,3,8,5	0.00330548	0.0476717	0.216	T72vT0 ribosomal depletion
chr7:112453645-112453645	A	G	+	3,2,7,6	0,0,1,2	2,3,6,3	1,3,2,2	0.00111176	0.0142713	0.277	T24vT0, poly-A enrichment
chr7:128318036-128318036	G	A	-	3,5,3,2	71,74,70,62	0,0,0,0	51,61,56,63	0.00346507	0.0283576	0.044	T72vT0, poly-A enrichment
chr7:128409911-128409911	G	A	-	6,9,10,4	67,48,66,54	0,0,1,1	68,63,69,44	3.15065e-09	2.38377e-07	0.101	T72vT0 ribosomal depletion
chr7:128409911-128409911	G	A	-	5,2,2,1	13,19,13,7	0,0,0,0	15,14,21,25	2.82167e-05	0.000353521	0.158	T72vT0, poly-A enrichment
chr7:128459911-128459911	C	T	+	14,41,37,36	66123151180	2,0,0,1	103249237232	0	0	0.191	T24vT0, poly-A enrichment
chr7:128459911-128459911	C	T	+	85,60,56,82	60,58,62,48	0,0,0,0	147149135119	0	0	0.55	T72vT0 ribosomal depletion
chr7:128459911-128459911	C	T	+	63,58,71,71	76,61,60,86	2,0,0,1	103249237232	0	0	0.478	T72vT0, poly-A enrichment
chr7:129602988-129602988	T	C	-	3,2,1,4	4,6,5,6	1,0,0,0	6,6,3,5	5.74637e-07	3.08855e-05	0.276	T72vT0 ribosomal depletion
chr7:129602996-129602996	T	C	-	4,2,0,6	3,7,5,5	1,0,0,0	6,6,5,5	2.42242e-06	0.000114584	0.299	T72vT0 ribosomal depletion
chr7:131030322-131030322	T	C	-	1,1,2,5	10,13,12,8	0,1,0,0	6,7,11,8	9.43547e-05	0.012355	0.141	T72vT0 ribosomal depletion, mutant A3B
chr7:138977687-138977687	G	A	-	7,3,0,4	2,1,4,8	0,0,0,1	7,6,5,5	6.74168e-07	3.54259e-05	0.424	T72vT0 ribosomal depletion
chr7:139285948-139285948	A	G	+	4,3,3,2	3,3,2,3	1,0,1,2	11,1,3,3	0.000594847	0.0126245	0.335	T72vT0 ribosomal depletion
chr7:142880314-142880314	G	A	-	3,7,2,5	28,24,21,22	0,0,0,0	36,54,54,48	4.74364e-09	8.9053e-08	0.149	T72vT0, poly-A enrichment
chr7:149134359-149134359	A	G	+	0,4,2,2	2,9,5,11	0,0,0,3	2,1,14,7	0.000530083	0.0076186	0.112	T24vT0, poly-A enrichment
chr7:152253618-152253618	T	C	-	3,3,4,1	10,2,1,5	0,1,0,2	1,9,6,4	5.83175e-05	0.00986958	0.341	T72vT0 ribosomal depletion, mutant A3B
chr7:152331493-152331493	T	C	-	1,1,3,3	5,5,3,1	0,0,1,0	7,6,1,5	1.89316e-05	0.00530267	0.271	T72vT0 ribosomal depletion, mutant A3B
chr7:152401525-152401525	T	C	-	4,5,5,5	16,16,4,13	1,2,1,1	14,14,13,8	0.000827488	0.0163673	0.224	T72vT0 ribosomal depletion
chr7:157214843-157214843	C	T	+	3,3,5,3	16,14,25,22	0,0,0,0	11,12,12,14	1.94021e-06	9.38859e-05	0.155	T72vT0 ribosomal depletion
chr7:157218978-157218978	C	T	+	5,6,7,7	12,19,17,16	0,0,0,0	7,9,9,10	7.50271e-10	6.21287e-08	0.283	T72vT0 ribosomal depletion
chr7:157372998-157372998	A	G	+	7,4,3,7	7,9,4,6	2,0,1,1	8,3,4,10	5.06408e-05	0.00167475	0.321	T72vT0 ribosomal depletion
chr7:157373926-157373926	A	G	+	7,8,7,13	26,18,22,24	3,0,1,6	26,14,17,17	0.00178901	0.02988	0.173	T72vT0 ribosomal depletion
chr7:157373953-157373953	A	G	+	10,8,7,10	23,18,18,21	1,2,3,5	22,13,15,16	0.00320273	0.0465007	0.158	T72vT0 ribosomal depletion
chr8:1844805-1844805	A	G	+	3,4,0,1	6,14,5,4	0,0,0,3	15,4,7,12	0.000552784	0.0119373	0.139	T72vT0 ribosomal depletion
chr8:8784301-8784301	G	A	-	7,5,5,10	24,26,34,23	0,0,0,0	36,49,40,45	8.07021e-13	5.77337e-11	0.205	T24vT0, poly-A enrichment
chr8:8784301-8784301	G	A	-	4,5,11,6	8,13,12,9	0,0,0,2	10,22,14,14	1.26703e-10	1.16544e-08	0.341	T72vT0 ribosomal depletion
chr8:8784301-8784301	G	A	-	4,3,1,7	12,19,10,15	0,0,0,0	36,49,40,45	2.0306e-09	3.96406e-08	0.199	T72vT0, poly-A enrichment
chr8:8884855-8884855	T	C	-	2,0,2,3	3,4,1,8	0,2,0,0	3,8,3,6	0.000682704	0.0372182	0.285	T72vT0 ribosomal depletion, mutant A3B
chr8:9782012-9782012	A	G	+	1,3,2,2	3,5,2,4	1,2,0,0	4,8,5,3	0.000916479	0.017685	0.265	T72vT0 ribosomal depletion
chr8:11825317-11825317	A	G	+	2,2,3,1	1,2,10,9	0,0,0,0	10,10,5,9	2.88471e-05	0.00698636	0.374	T72vT0 ribosomal depletion, mutant A3B
chr8:11838712-11838712	C	T	+	5,6,7,3	96,89,118,76	0,0,0,0	179217168184	1.64431e-06	8.0681e-05	0.052	T72vT0 ribosomal depletion
chr8:15623139-15623139	C	T	+	4,15,7,6	164150148151	0,0,0,3	228215222199	2.63208e-08	1.71221e-06	0.046	T72vT0 ribosomal depletion
chr8:15623139-15623139	C	T	+	7,13,7,14	211210229245	0,1,0,0	328420361442	1.24833e-10	2.63856e-09	0.043	T72vT0, poly-A enrichment
chr8:17804443-17804443	A	G	+	2,3,0,3	5,21,12,16	1,0,0,0	6,12,11,11	0.00311518	0.0455018	0.106	T72vT0 ribosomal depletion
chr8:18057223-18057223	G	A	-	6,12,5,6	286269211289	2,0,0,0	321391375393	0.00039129	0.00399864	0.025	T72vT0, poly-A enrichment
chr8:22254442-22254442	A	G	+	5,0,4,3	12,9,15,10	0,0,0,0	14,11,7,6	9.08663e-07	2.78147e-05	0.184	T24vT0, poly-A enrichment
chr8:22254442-22254442	A	G	+	5,1,2,1	19,15,17,17	0,0,0,0	14,11,7,6	0.000751763	0.00730142	0.108	T72vT0, poly-A enrichment
chr8:23571077-23571077	C	T	+	3,3,3,3	15,27,19,21	0,0,0,0	20,34,35,38	5.89223e-06	0.0001477	0.132	T24vT0, poly-A enrichment
chr8:23571077-23571077	C	T	+	2,4,3,3	18,32,24,25	0,0,0,0	32,29,25,17	2.53842e-05	0.000910081	0.107	T72vT0 ribosomal depletion
chr8:26355609-26355609	A	G	+	5,1,1,0	7,3,5,5	0,0,0,1	7,4,7,4	0.00284469	0.0425154	0.158	T72vT0 ribosomal depletion
chr8:26402669-26402669	A	G	+	3,4,3,5	2,8,5,10	0,2,0,0	4,17,6,6	3.03171e-07	1.72033e-05	0.384	T72vT0 ribosomal depletion
chr8:28385584-28385584	T	C	-	4,5,0,1	22,15,31,19	0,0,0,0	38,22,31,37	0.000427602	0.00975476	0.113	T72vT0 ribosomal depletion
chr8:28443303-28443303	T	C	-	6,3,1,0	7,4,12,5	2,0,1,0	4,7,3,3	0.00275555	0.0415969	0.096	T72vT0 ribosomal depletion
chr8:28907870-28907870	A	G	+	0,0,6,3	11,21,5,13	0,0,0,0	3,7,6,6	0.00102903	0.019302	0.183	T72vT0 ribosomal depletion
chr8:30167479-30167479	A	G	+	4,1,1,3	16,9,4,5	0,0,0,0	13,7,5,7	9.00952e-06	0.00347272	0.219	T72vT0 ribosomal depletion, mutant A3B
chr8:30724200-30724200	T	C	-	2,1,1,4	10,9,5,11	0,1,0,1	7,4,3,6	0.000730941	0.0387582	0.089	T72vT0 ribosomal depletion, mutant A3B
chr8:31072568-31072568	A	G	+	2,4,4,3	8,7,7,11	0,0,1,0	11,11,2,7	1.82078e-06	8.87877e-05	0.202	T72vT0 ribosomal depletion
chr8:37893594-37893594	T	C	-	3,2,1,4	31,20,33,34	0,0,0,0	20,34,24,31	0.00141357	0.024832	0.078	T72vT0 ribosomal depletion
chr8:38323733-38323733	T	C	-	3,4,2,1	20,7,15,14	0,1,0,0	13,7,17,15	3.75808e-05	0.00791134	0.138	T72vT0 ribosomal depletion, mutant A3B
chr8:38347823-38347823	G	A	-	14,16,20,24	220268203186	0,0,0,0	265233254229	0	0	0.08	T24vT0, poly-A enrichment
chr8:38347823-38347823	G	A	-	30,36,35,41	155150128150	0,0,0,0	185235187195	0	0	0.196	T72vT0 ribosomal depletion
chr8:38347823-38347823	G	A	-	24,16,25,21	124101115115	0,0,0,0	265233254229	0	0	0.158	T72vT0, poly-A enrichment
chr8:38852785-38852785	C	T	+	6,7,2,6	92,124,111,87	0,0,0,0	136127131126	7.90844e-06	0.00032195	0.049	T72vT0 ribosomal depletion
chr8:38852785-38852785	C	T	+	7,6,9,6	123127175125	0,0,0,1	168295287290	4.36317e-08	7.51847e-07	0.048	T72vT0, poly-A enrichment
chr8:41621802-41621802	C	T	+	11,10,11,10	143141133128	0,0,0,0	150140143137	2.69063e-12	2.8109e-10	0.072	T72vT0 ribosomal depletion
chr8:41621802-41621802	C	T	+	10,10,9,6	146136152125	0,0,0,0	186206199206	9.10411e-11	1.9453e-09	0.059	T72vT0, poly-A enrichment
chr8:42402135-42402135	C	T	+	4,3,3,1	45,36,48,25	0,0,0,0	45,33,29,41	0.00129624	0.0231446	0.064	T72vT0 ribosomal depletion
chr8:42402135-42402135	C	T	+	4,4,4,2	30,26,27,39	0,0,0,0	26,43,55,43	3.59652e-06	5.08008e-05	0.107	T72vT0, poly-A enrichment
chr8:43076429-43076429	A	G	+	1,2,3,6	13,21,16,20	2,0,0,0	13,8,13,13	0.000230096	0.00581227	0.103	T72vT0 ribosomal depletion
chr8:47875046-47875046	T	C	-	0,2,2,5	14,13,19,18	0,0,0,1	10,14,15,7	0.00100049	0.0188825	0.08	T72vT0 ribosomal depletion
chr8:51884767-51884767	G	A	-	7,4,7,3	26,17,25,24	0,0,0,0	22,18,24,29	1.41792e-09	1.12401e-07	0.183	T72vT0 ribosomal depletion
chr8:52661113-52661113	G	A	-	0,0,9,0	5,3,78,6	0,0,0,0	194190188174	0.00632864	0.046542	0.026	T72vT0, poly-A enrichment
chr8:54098788-54098788	T	C	-	2,0,1,5	8,16,8,5	0,2,0,0	3,9,8,11	0.00291905	0.0433597	0.157	T72vT0 ribosomal depletion
chr8:58427205-58427205	A	G	+	3,3,0,3	20,9,13,9	1,1,0,0	4,9,12,4	0.000726497	0.038681	0.083	T72vT0 ribosomal depletion, mutant A3B
chr8:60603830-60603830	A	G	+	4,1,2,1	10,11,11,10	0,0,0,0	8,8,10,5	0.000258211	0.0218776	0.153	T72vT0 ribosomal depletion, mutant A3B
chr8:65649436-65649436	A	G	+	4,1,3,1	6,10,9,11	0,0,0,1	7,8,3,10	0.000123973	0.00348916	0.183	T72vT0 ribosomal depletion
chr8:65652071-65652071	A	G	+	2,3,2,5	36,34,43,52	0,0,0,0	16,12,14,18	0.000736681	0.0149468	0.066	T72vT0 ribosomal depletion
chr8:65652081-65652081	A	G	+	5,7,2,5	29,30,39,51	0,2,0,0	18,11,17,21	6.89155e-05	0.00216347	0.08	T72vT0 ribosomal depletion
chr8:65685561-65685561	C	T	+	2,7,3,4	5,16,9,9	0,0,0,0	11,8,5,9	5.4526e-09	4.01001e-07	0.287	T72vT0 ribosomal depletion
chr8:65729596-65729596	T	C	-	4,7,9,8	54,60,63,64	0,1,0,0	55,44,53,56	6.38613e-09	4.65317e-07	0.097	T72vT0 ribosomal depletion
chr8:65729596-65729596	T	C	-	12,4,8,7	58,73,55,62	2,2,0,1	27,64,50,72	1.26392e-06	1.87072e-05	0.085	T72vT0, poly-A enrichment
chr8:66679468-66679468	C	T	+	3,3,3,3	12,31,9,34	0,0,0,0	18,28,23,36	1.09056e-05	0.000256585	0.155	T24vT0, poly-A enrichment
chr8:67071005-67071005	A	G	+	1,0,5,2	2,8,6,7	0,0,0,1	5,5,2,10	0.000325811	0.00785882	0.23	T72vT0 ribosomal depletion
chr8:67198901-67198901	G	A	-	2,7,11,9	126263338290	0,0,0,0	173388297364	0.000244047	0.00394769	0.026	T24vT0, poly-A enrichment
chr8:67198901-67198901	G	A	-	7,9,11,10	56,73,79,74	0,0,0,0	94,75,81,65	3.85136e-13	4.33966e-11	0.116	T72vT0 ribosomal depletion
chr8:67198901-67198901	G	A	-	8,10,7,13	104,78,129,148	0,0,0,0	173388297364	1.33227e-15	3.76366e-14	0.079	T72vT0, poly-A enrichment
chr8:67254654-67254654	T	C	-	4,3,2,2	13,23,17,24	0,0,0,0	8,9,18,25	4.38044e-05	0.00147024	0.133	T72vT0 ribosomal depletion
chr8:81700705-81700705	T	C	-	4,1,1,1	4,4,3,12	0,2,0,0	7,8,7,10	0.00114181	0.0493796	0.207	T72vT0 ribosomal depletion, mutant A3B
chr8:93821836-93821836	A	G	+	0,1,4,2	1,4,7,2	0,0,0,0	8,6,4,3	0.000299721	0.023616	0.266	T72vT0 ribosomal depletion, mutant A3B
chr8:94654211-94654211	A	G	+	2,4,3,2	10,3,9,3	1,0,0,0	7,5,14,2	6.51065e-07	3.4465e-05	0.316	T72vT0 ribosomal depletion
chr8:94669790-94669790	A	G	+	4,2,2,5	4,4,2,5	0,1,2,4	6,11,11,5	0.00591482	0.044106	0.288	T72vT0, poly-A enrichment
chr8:94732450-94732450	A	G	+	4,5,4,4	1,2,1,2	0,2,3,3	7,8,5,2	4.81882e-05	0.00897395	0.451	T72vT0 ribosomal depletion, mutant A3B
chr8:96333522-96333522	C	T	+	8,7,15,7	308383341388	0,1,0,0	381438387408	7.7962e-05	0.000907138	0.025	T72vT0, poly-A enrichment
chr8:97670195-97670195	A	G	+	5,1,1,2	10,9,7,6	0,0,0,1	7,7,9,14	1.42543e-05	0.00448389	0.185	T72vT0 ribosomal depletion, mutant A3B
chr8:98672375-98672375	T	C	-	7,3,5,6	21,10,18,22	0,0,1,0	11,19,12,15	1.59327e-08	1.08103e-06	0.209	T72vT0 ribosomal depletion
chr8:98676447-98676447	T	C	-	3,0,2,4	12,23,12,19	0,1,0,0	13,18,19,21	0.000274148	0.0228023	0.116	T72vT0 ribosomal depletion, mutant A3B
chr8:100927508-100927508	T	C	-	3,4,5,6	42,32,45,40	0,0,0,2	45,44,43,61	1.92479e-06	9.34261e-05	0.094	T72vT0 ribosomal depletion
chr8:101497234-101497234	C	T	+	3,3,2,3	11,14,14,14	0,0,0,0	6,7,9,8	1.1983e-05	0.000279471	0.173	T24vT0, poly-A enrichment
chr8:101497234-101497234	C	T	+	14,11,15,12	125127120124	0,0,0,0	120,124,93,116	6.55032e-15	8.2997e-13	0.095	T72vT0 ribosomal depletion
chr8:101498549-101498549	C	T	+	3,3,3,3	7,2,4,6	0,0,0,0	7,6,10,15	1.50699e-09	7.6151e-08	0.415	T24vT0, poly-A enrichment
chr8:101498549-101498549	C	T	+	11,9,15,18	54,48,50,66	0,0,0,0	51,51,63,64	0	0	0.193	T72vT0 ribosomal depletion
chr8:101545623-101545623	C	T	+	3,3,1,3	13,13,6,17	0,0,0,0	13,10,14,13	1.61431e-05	0.000617353	0.167	T72vT0 ribosomal depletion
chr8:101548734-101548734	C	T	+	8,11,10,15	76,85,81,68	0,0,0,0	43,65,56,73	5.51226e-13	6.14529e-11	0.125	T72vT0 ribosomal depletion
chr8:101592364-101592364	A	G	+	5,1,2,5	21,16,23,19	0,1,0,0	11,17,8,7	2.20671e-05	0.000803944	0.121	T72vT0 ribosomal depletion
chr8:101592377-101592377	A	G	+	3,1,3,3	28,16,22,22	0,0,0,0	9,18,8,6	0.00034519	0.00825056	0.099	T72vT0 ribosomal depletion
chr8:102393924-102393924	T	C	-	2,4,2,2	17,14,6,11	0,0,0,2	6,11,17,16	0.000215073	0.0055302	0.155	T72vT0 ribosomal depletion
chr8:102405576-102405576	T	C	-	2,1,3,3	9,8,9,5	0,0,0,1	9,5,7,4	7.79906e-05	0.00239358	0.179	T72vT0 ribosomal depletion
chr8:106660578-106660578	A	G	+	2,1,1,3	0,3,7,5	0,0,0,2	5,2,6,5	0.000568887	0.0337732	0.366	T72vT0 ribosomal depletion, mutant A3B
chr8:106751306-106751306	C	T	+	1,5,5,5	30,35,44,40	0,0,0,0	67109137132	1.65963e-07	2.6865e-06	0.093	T72vT0, poly-A enrichment
chr8:108220898-108220898	T	C	-	4,1,2,6	41,40,44,34	0,2,0,0	35,19,30,32	0.000752086	0.0151756	0.053	T72vT0 ribosomal depletion
chr8:115408609-115408609	G	A	-	1,3,1,3	12,25,19,21	0,0,0,0	29,39,41,23	0.00229633	0.0362065	0.09	T72vT0 ribosomal depletion
chr8:115409623-115409623	G	A	-	20,24,29,22	224453455465	0,0,0,0	344804699750	0	0	0.059	T24vT0, poly-A enrichment
chr8:115409623-115409623	G	A	-	94118156117	218253245235	0,0,0,0	702622614418	0	0	0.335	T72vT0 ribosomal depletion
chr8:115409623-115409623	G	A	-	76,82,92,105	182206216247	0,0,0,0	344804699750	0	0	0.294	T72vT0, poly-A enrichment
chr8:115412995-115412995	G	A	-	11,28,19,9	139269229174	1,0,0,0	318396331273	0	0	0.073	T72vT0 ribosomal depletion
chr8:115412995-115412995	G	A	-	10,15,11,12	172181185206	0,0,0,0	279642710662	0	0	0.061	T72vT0, poly-A enrichment
chr8:115414228-115414228	G	A	-	29,66,34,23	553843878951	0,0,0,2	457793782834	0	0	0.045	T24vT0, poly-A enrichment
chr8:115414708-115414708	G	A	-	34,39,33,19	111910929861094	0,0,0,1	1332127612661150	4.44089e-16	6.22712e-14	0.028	T72vT0 ribosomal depletion
chr8:115414708-115414708	G	A	-	26,27,22,30	1041110412141270	0,0,2,1	952138812171294	4.78094e-09	8.94676e-08	0.022	T72vT0, poly-A enrichment
chr8:115435416-115435416	G	A	-	0,3,3,3	2,12,10,17	0,0,0,0	1,7,8,10	0.000109826	0.00198654	0.145	T24vT0, poly-A enrichment
chr8:115435416-115435416	G	A	-	11,11,11,14	202187167181	0,0,0,0	164162211198	2.59703e-12	2.73121e-10	0.06	T72vT0 ribosomal depletion
chr8:115466763-115466763	G	A	-	50,45,45,47	257207238281	0,0,0,0	216251251288	0	0	0.161	T72vT0 ribosomal depletion
chr8:115485834-115485834	G	A	-	28,46,32,40	94,136,89,83	0,0,0,0	101138119125	0	0	0.268	T72vT0 ribosomal depletion
chr8:115502692-115502692	G	A	-	60,86,77,60	379436308413	0,0,0,0	254429423428	0	0	0.157	T72vT0 ribosomal depletion
chr8:115513889-115513889	G	A	-	3,7,10,6	9,34,45,26	0,0,0,0	23,44,29,36	1.87924e-11	1.83561e-09	0.198	T72vT0 ribosomal depletion
chr8:115531988-115531988	G	A	-	3,3,3,3	6,6,11,6	0,0,0,0	13,8,5,9	2.51755e-08	1.04766e-06	0.304	T24vT0, poly-A enrichment
chr8:115531988-115531988	G	A	-	187138149170	592634406520	1,0,0,0	419664674614	0	0	0.233	T72vT0 ribosomal depletion
chr8:115531988-115531988	G	A	-	3,3,2,2	10,9,9,6	0,0,0,0	13,8,5,9	3.48814e-06	4.93887e-05	0.228	T72vT0, poly-A enrichment
chr8:115561360-115561360	G	A	-	20,34,22,32	475462439488	0,0,0,0	413473461482	0	0	0.055	T72vT0 ribosomal depletion
chr8:115565137-115565137	G	A	-	0,2,3,3	3,7,4,3	0,0,0,0	3,2,7,10	5.45824e-05	0.00106603	0.288	T24vT0, poly-A enrichment
chr8:115565137-115565137	G	A	-	148178185167	523669556655	0,0,0,0	668745685767	0	0	0.221	T72vT0 ribosomal depletion
chr8:115569595-115569595	G	A	-	25,41,41,39	46,124,111,87	0,0,0,0	117188109131	0	0	0.295	T72vT0 ribosomal depletion
chr8:115586249-115586249	G	A	-	1,3,3,3	15,20,16,11	0,0,0,0	4,11,4,4	0.000102231	0.00186506	0.141	T24vT0, poly-A enrichment
chr8:115586249-115586249	G	A	-	21,31,27,19	271392376309	0,0,0,0	284322293318	0	0	0.068	T72vT0 ribosomal depletion
chr8:115587106-115587106	G	A	-	9,37,49,34	221503498501	0,0,0,0	296711623650	0	0	0.065	T24vT0, poly-A enrichment
chr8:115587106-115587106	G	A	-	161162240238	926916918870	0,0,1,0	1812160216191550	0	0	0.18	T72vT0 ribosomal depletion
chr8:115587106-115587106	G	A	-	70,75,87,63	365389497336	0,0,0,0	296711623650	0	0	0.157	T72vT0, poly-A enrichment
chr8:115620910-115620910	G	A	-	88,121,86,62	155193171178	0,0,0,0	176274235247	0	0	0.335	T72vT0 ribosomal depletion
chr8:115628993-115628993	G	A	-	12,25,16,15	105133134122	0,0,0,0	115148119146	0	0	0.119	T72vT0 ribosomal depletion
chr8:115641049-115641049	G	A	-	9,14,12,11	82,85,100,90	0,0,0,0	82121103116	7.77156e-16	1.07541e-13	0.114	T72vT0 ribosomal depletion
chr8:115650032-115650032	G	A	-	12,9,13,12	181224232207	0,0,0,0	185210199209	4.19124e-11	4.00708e-09	0.052	T72vT0 ribosomal depletion
chr8:115663246-115663246	G	A	-	13,15,12,14	68,91,66,78	0,0,0,0	77,112,75,98	0	0	0.152	T72vT0 ribosomal depletion
chr8:115705100-115705100	G	A	-	19,32,15,27	32,42,37,29	2,0,1,18	49,33,39,26	9.35568e-07	4.79954e-05	0.276	T72vT0 ribosomal depletion
chr8:116767946-116767946	A	G	+	3,4,6,3	2,11,10,8	1,0,0,0	10,10,4,10	4.58745e-08	1.84863e-06	0.356	T24vT0, poly-A enrichment
chr8:117940875-117940875	G	A	-	4,3,1,3	31,34,17,33	0,0,0,0	45,36,37,28	0.000227341	0.00576112	0.084	T72vT0 ribosomal depletion
chr8:122793169-122793169	A	G	+	2,2,2,1	14,14,12,15	0,1,0,0	4,9,9,4	0.00308584	0.0451987	0.089	T72vT0 ribosomal depletion
chr8:122881145-122881145	C	T	+	1,2,4,3	18,18,18,7	0,0,0,0	7,7,6,13	7.93487e-05	0.00243054	0.159	T72vT0 ribosomal depletion
chr8:122885624-122885624	A	G	+	8,1,3,3	12,15,13,18	0,0,1,0	4,9,6,6	7.29262e-06	0.000300545	0.163	T72vT0 ribosomal depletion
chr8:123014639-123014639	G	A	-	8,5,4,3	126145132129	1,0,0,1	132127137114	0.000513115	0.0112657	0.032	T72vT0 ribosomal depletion
chr8:123014639-123014639	G	A	-	3,5,6,8	128147160153	1,0,1,1	181202258313	0.00012422	0.0013983	0.032	T72vT0, poly-A enrichment
chr8:123224589-123224589	T	C	-	2,4,2,2	13,20,16,26	0,1,0,0	8,12,15,15	0.000331145	0.00796313	0.101	T72vT0 ribosomal depletion
chr8:123330262-123330262	T	C	-	1,2,4,5	20,27,25,19	0,0,2,0	6,17,11,15	0.000676497	0.00928287	0.077	T24vT0, poly-A enrichment
chr8:123331034-123331034	T	C	-	2,5,1,1	8,19,12,15	0,0,1,1	1,7,9,3	0.00292035	0.0326781	0.049	T24vT0, poly-A enrichment
chr8:123519309-123519309	T	C	-	3,2,5,0	7,3,6,4	0,2,0,0	4,11,15,15	4.70287e-06	6.56391e-05	0.25	T72vT0, poly-A enrichment
chr8:123519319-123519319	T	C	-	2,1,5,2	8,4,6,1	0,2,1,0	5,8,14,14	5.26245e-05	0.000631065	0.314	T72vT0, poly-A enrichment
chr8:124553262-124553262	G	A	-	3,3,1,2	26,39,34,28	0,0,0,0	36,39,37,43	0.0052293	0.0400096	0.068	T72vT0, poly-A enrichment
chr8:125093434-125093434	A	G	+	4,2,2,0	8,8,7,7	0,0,1,0	8,6,3,9	0.000494583	0.0109579	0.126	T72vT0 ribosomal depletion
chr8:127977935-127977935	A	G	+	6,2,2,5	51,30,32,41	0,2,0,0	30,21,31,29	0.000137935	0.00382077	0.062	T72vT0 ribosomal depletion
chr8:127992334-127992334	A	G	+	4,3,1,5	14,14,12,9	0,0,0,0	6,6,11,7	3.54169e-07	1.98121e-05	0.208	T72vT0 ribosomal depletion
chr8:127992507-127992507	A	G	+	9,6,4,9	72,72,70,70	0,0,0,0	57,59,64,59	4.47099e-09	3.32688e-07	0.089	T72vT0 ribosomal depletion
chr8:129910908-129910908	T	C	-	4,3,0,2	4,11,6,18	0,0,0,0	10,12,2,14	3.97326e-05	0.00816296	0.204	T72vT0 ribosomal depletion, mutant A3B
chr8:130401517-130401517	T	C	-	2,3,0,3	4,5,6,8	1,0,0,1	5,9,9,7	0.000492844	0.0109348	0.172	T72vT0 ribosomal depletion
chr8:139857964-139857964	T	C	-	2,2,3,5	5,2,6,7	0,0,1,3	9,15,6,3	0.000931691	0.017903	0.223	T72vT0 ribosomal depletion
chr8:140182062-140182062	G	A	-	6,12,4,7	15,22,11,15	0,0,0,0	22,19,23,15	1.00586e-13	1.16245e-11	0.306	T72vT0 ribosomal depletion
chr8:140691233-140691233	T	C	-	6,5,4,1	18,21,28,21	2,0,0,2	27,19,26,21	4.37085e-05	0.00860555	0.114	T72vT0 ribosomal depletion, mutant A3B
chr8:140692287-140692287	T	C	-	1,3,1,5	2,8,4,2	0,1,0,0	9,11,6,5	7.74288e-07	4.02451e-05	0.359	T72vT0 ribosomal depletion
chr8:142277214-142277214	T	C	-	4,4,1,3	17,6,5,8	1,0,0,0	8,7,12,15	6.83913e-07	1.04381e-05	0.23	T72vT0, poly-A enrichment
chr8:142669387-142669387	T	C	-	9,5,4,2	44,40,32,38	3,1,0,1	41,23,28,16	0.00211908	0.0340308	0.068	T72vT0 ribosomal depletion
chr8:142739089-142739089	A	G	+	1,4,2,3	23,14,14,16	0,0,0,0	3,8,8,18	0.000125891	0.00353683	0.137	T72vT0 ribosomal depletion
chr8:143267742-143267742	A	G	+	23,13,20,11	53,39,59,52	10,9,6,10	88,72,65,57	2.93851e-05	0.00103471	0.133	T72vT0 ribosomal depletion
chr8:143481169-143481169	T	C	-	0,6,3,0	2,9,9,15	0,0,0,0	3,12,11,5	0.00022137	0.00363301	0.163	T24vT0, poly-A enrichment
chr8:143566481-143566481	T	C	-	4,6,6,6	166156157153	0,0,0,4	38105102105	0.0036811	0.0300419	0.025	T72vT0, poly-A enrichment
chr8:143591071-143591071	T	C	-	3,5,5,3	26,79,62,64	0,0,2,4	35,47,79,81	0.00560498	0.0422784	0.053	T72vT0, poly-A enrichment
chr8:143725821-143725821	G	A	-	5,7,4,6	132141145108	0,1,0,1	211178225204	3.37768e-05	0.00116848	0.038	T72vT0 ribosomal depletion
chr8:143726294-143726294	G	A	-	0,7,13,17	231476481479	0,1,2,0	272452429451	0.00138601	0.0172049	0.017	T24vT0, poly-A enrichment
chr8:143726294-143726294	G	A	-	15,12,10,10	307263304238	1,0,0,7	404356374368	2.77602e-09	2.12066e-07	0.035	T72vT0 ribosomal depletion
chr8:143726294-143726294	G	A	-	6,15,13,6	271240235216	0,1,2,0	272452429451	2.47091e-09	4.77601e-08	0.038	T72vT0, poly-A enrichment
chr8:144035729-144035729	G	A	-	3,4,3,4	24,73,63,75	0,0,0,0	39,65,78,70	0.000298486	0.00468094	0.065	T24vT0, poly-A enrichment
chr8:144035729-144035729	G	A	-	7,14,11,12	55,59,67,60	0,0,0,0	65,49,52,71	5.10703e-15	6.5766e-13	0.153	T72vT0 ribosomal depletion
chr8:144035729-144035729	G	A	-	11,8,12,12	52,43,59,42	0,0,0,0	39,65,78,70	1.11022e-16	3.26184e-15	0.181	T72vT0, poly-A enrichment
chr8:144039507-144039507	T	C	-	3,3,1,4	45,26,40,35	0,3,1,0	15,52,48,61	0.00581582	0.043478	0.054	T72vT0, poly-A enrichment
chr8:144157271-144157271	A	G	+	1,2,3,7	17,17,13,15	0,1,0,0	5,6,4,12	2.55405e-06	0.00155326	0.131	T72vT0 ribosomal depletion, mutant A3B
chr8:144292705-144292705	A	G	+	1,2,4,2	22,25,29,21	0,0,1,0	24,26,11,27	0.00329246	0.0358344	0.061	T24vT0, poly-A enrichment
chr8:144295836-144295836	A	G	+	1,2,4,1	11,9,21,16	0,0,1,0	4,4,14,9	0.00208366	0.0335872	0.104	T72vT0 ribosomal depletion
chr8:144307560-144307560	T	C	-	10,8,0,1	12,16,18,18	0,0,0,3	7,4,3,5	0.00282571	0.0317868	0.116	T24vT0, poly-A enrichment
chr8:144407354-144407354	T	C	-	2,1,3,5	12,9,7,13	2,0,0,0	10,18,9,8	6.31009e-05	0.00202059	0.163	T72vT0 ribosomal depletion
chr8:144460095-144460095	T	C	-	2,7,3,6	68,54,67,55	1,0,1,1	79,44,65,55	6.93443e-05	0.00217045	0.06	T72vT0 ribosomal depletion
chr8:144460095-144460095	T	C	-	9,6,7,9	47,59,38,58	1,0,1,4	23,60,53,63	1.81238e-06	2.66238e-05	0.106	T72vT0, poly-A enrichment
chr8:144473504-144473504	C	T	+	19,27,20,21	580713663652	0,1,0,0	817841884920	1.11022e-14	9.55242e-13	0.032	T24vT0, poly-A enrichment
chr8:144473504-144473504	C	T	+	43,32,44,39	264251260280	0,0,0,0	456389438381	0	0	0.13	T72vT0 ribosomal depletion
chr8:144473504-144473504	C	T	+	53,60,47,65	491551495516	0,1,0,0	817841884920	0	0	0.098	T72vT0, poly-A enrichment
chr8:144550269-144550269	T	C	-	2,1,1,5	9,1,4,5	0,2,0,1	5,8,5,4	0.000202223	0.00525547	0.245	T72vT0 ribosomal depletion
chr8:144826099-144826099	T	C	-	5,6,4,10	8,20,20,20	2,3,1,5	21,23,25,29	0.00134297	0.016799	0.182	T24vT0, poly-A enrichment
chr8:144886013-144886013	T	C	-	2,0,2,3	6,4,8,5	0,0,0,1	10,8,7,6	0.000865908	0.0422694	0.171	T72vT0 ribosomal depletion, mutant A3B
chr8:144998183-144998183	T	C	-	2,2,3,1	9,7,6,13	0,1,0,1	7,5,9,13	0.00123551	0.0223128	0.143	T72vT0 ribosomal depletion
chr9:5786845-5786845	G	A	-	9,10,7,11	343395346430	0,0,0,0	444494458507	0.000244909	0.00394769	0.024	T24vT0, poly-A enrichment
chr9:5786845-5786845	G	A	-	13,12,11,10	148128124106	0,0,0,2	207204198173	3.21965e-15	4.19751e-13	0.081	T72vT0 ribosomal depletion
chr9:5786845-5786845	G	A	-	14,9,16,14	143131183177	0,0,0,0	444494458507	0	0	0.077	T72vT0, poly-A enrichment
chr9:6487397-6487397	A	G	+	3,1,1,2	4,5,4,6	0,0,0,0	6,4,16,6	0.000749271	0.015157	0.261	T72vT0 ribosomal depletion
chr9:12775548-12775548	C	T	+	19,22,25,30	395610585597	0,0,0,0	442626632641	0	0	0.042	T24vT0, poly-A enrichment
chr9:12775548-12775548	C	T	+	143,98,121,102	744788777719	0,0,1,0	883879929825	0	0	0.132	T72vT0 ribosomal depletion
chr9:12775548-12775548	C	T	+	45,42,68,43	400406413364	0,0,0,0	442626632641	0	0	0.11	T72vT0, poly-A enrichment
chr9:12775818-12775818	C	T	+	8,6,8,8	43,42,50,44	0,0,0,0	45,42,36,47	3.25121e-11	3.12731e-09	0.143	T72vT0 ribosomal depletion
chr9:12777087-12777087	C	T	+	4,8,8,6	48,51,54,51	0,0,0,0	52,66,52,56	4.79348e-10	4.06544e-08	0.112	T72vT0 ribosomal depletion
chr9:12778472-12778472	C	T	+	3,3,3,3	8,16,19,17	0,0,0,0	18,25,38,29	1.08225e-06	3.26572e-05	0.179	T24vT0, poly-A enrichment
chr9:12778472-12778472	C	T	+	31,34,33,39	99,101,83,96	0,0,0,0	119162113118	0	0	0.266	T72vT0 ribosomal depletion
chr9:12778472-12778472	C	T	+	1,2,1,3	2,8,8,10	0,0,0,0	18,25,38,29	0.00264697	0.0225088	0.219	T72vT0, poly-A enrichment
chr9:12794150-12794150	C	T	+	28,42,49,41	19,24,19,28	0,0,0,0	45,66,61,60	0	0	0.637	T72vT0 ribosomal depletion
chr9:12794150-12794150	C	T	+	4,1,4,8	3,3,3,5	0,0,0,0	6,13,3,10	1.07081e-12	2.65489e-11	0.502	T72vT0, poly-A enrichment
chr9:12795459-12795459	C	T	+	3,3,3,3	7,7,6,10	0,0,0,0	14,11,15,10	4.87715e-08	1.95301e-06	0.291	T24vT0, poly-A enrichment
chr9:12795459-12795459	C	T	+	1,7,5,4	20,39,35,36	0,0,1,0	26,33,26,25	1.90858e-06	9.27825e-05	0.097	T72vT0 ribosomal depletion
chr9:12811913-12811913	C	T	+	12,10,11,8	133139146145	0,0,0,0	127159158144	8.39617e-12	8.46323e-10	0.068	T72vT0 ribosomal depletion
chr9:14200599-14200599	G	A	-	1,3,1,2	8,17,12,16	0,0,0,0	24,20,26,22	0.00247565	0.0381754	0.112	T72vT0 ribosomal depletion
chr9:14258991-14258991	G	A	-	6,7,6,6	32,31,33,38	0,0,0,0	64,66,63,51	3.08253e-12	3.2097e-10	0.158	T72vT0 ribosomal depletion
chr9:14296622-14296622	G	A	-	7,5,5,9	63,69,67,88	0,0,0,0	105,82,102,81	2.06215e-09	1.61041e-07	0.082	T72vT0 ribosomal depletion
chr9:14301290-14301290	G	A	-	2,2,2,2	20,14,12,17	0,0,0,0	20,27,21,17	0.000849871	0.0167584	0.116	T72vT0 ribosomal depletion
chr9:15294402-15294402	G	A	-	6,8,9,5	17,29,27,17	0,0,0,0	12,11,10,14	7.05639e-10	5.88966e-08	0.239	T72vT0 ribosomal depletion
chr9:15298627-15298627	T	C	-	4,1,4,4	59,55,51,58	0,0,0,0	16,17,21,25	0.00128487	0.0229935	0.055	T72vT0 ribosomal depletion
chr9:15409257-15409257	A	G	+	9,6,6,7	48,37,35,51	0,0,0,0	6,5,3,18	5.42308e-07	2.91976e-05	0.141	T72vT0 ribosomal depletion
chr9:15459849-15459849	C	T	+	10,11,16,16	192216201204	0,0,0,0	242243239232	1.35447e-14	1.13473e-12	0.061	T24vT0, poly-A enrichment
chr9:15459849-15459849	C	T	+	15,17,15,11	65,105,63,71	0,0,0,1	135104105126	0	0	0.161	T72vT0 ribosomal depletion
chr9:15459849-15459849	C	T	+	23,23,29,30	132121170185	0,0,0,0	242243239232	0	0	0.148	T72vT0, poly-A enrichment
chr9:20574633-20574633	T	C	-	4,5,6,8	4,5,5,1	2,1,1,2	3,6,5,3	0.00290452	0.0432049	0.331	T72vT0 ribosomal depletion
chr9:33023502-33023502	T	C	-	1,4,6,5	6,15,13,12	0,0,1,2	1,5,10,8	0.000256284	0.0040999	0.168	T24vT0, poly-A enrichment
chr9:33112069-33112069	G	A	-	30,16,11,8	499330316315	0,0,0,0	601355370327	6.19504e-14	4.93048e-12	0.04	T24vT0, poly-A enrichment
chr9:33112069-33112069	G	A	-	54,55,55,57	325298293329	0,0,0,0	601355370327	0	0	0.151	T72vT0, poly-A enrichment
chr9:33121393-33121393	T	C	-	6,6,3,5	25,26,17,18	0,0,0,2	6,9,3,6	8.14634e-05	0.00247608	0.125	T72vT0 ribosomal depletion
chr9:33122493-33122493	T	C	-	7,8,7,10	20,22,24,17	0,1,2,2	16,21,15,10	1.21931e-05	0.000477878	0.198	T72vT0 ribosomal depletion
chr9:33131237-33131237	G	A	-	7,2,4,5	105,102,103,94	0,0,0,1	38,32,24,39	0.00161031	0.0276416	0.036	T72vT0 ribosomal depletion
chr9:33148035-33148035	T	C	-	3,2,2,2	7,13,17,13	0,1,1,0	11,10,6,5	0.00132382	0.0235438	0.11	T72vT0 ribosomal depletion
chr9:33828518-33828518	A	G	+	2,3,0,3	5,9,6,7	0,0,0,0	4,5,9,5	0.000207115	0.00536053	0.209	T72vT0 ribosomal depletion
chr9:33835604-33835604	A	G	+	2,1,2,1	11,8,13,4	0,0,0,1	4,3,5,10	0.00310197	0.045392	0.127	T72vT0 ribosomal depletion
chr9:33835627-33835627	A	G	+	3,4,8,1	11,7,6,5	1,0,0,3	3,7,6,13	0.000597367	0.0126586	0.22	T72vT0 ribosomal depletion
chr9:33836128-33836128	A	G	+	5,2,0,2	11,10,12,11	1,0,0,1	4,7,15,12	0.000994184	0.0188049	0.089	T72vT0 ribosomal depletion
chr9:33867715-33867715	A	G	+	5,5,3,10	7,15,10,6	1,1,0,5	8,14,11,10	0.00251851	0.0387039	0.253	T72vT0 ribosomal depletion
chr9:34008120-34008120	T	C	-	2,3,4,2	11,2,5,6	2,1,0,0	10,18,3,4	1.3639e-05	0.00434023	0.307	T72vT0 ribosomal depletion, mutant A3B
chr9:34008279-34008279	T	C	-	2,4,2,4	3,8,10,2	0,0,0,0	12,6,5,12	1.34086e-08	9.2166e-07	0.392	T72vT0 ribosomal depletion
chr9:34042614-34042614	T	C	-	6,1,4,5	6,13,4,16	2,1,0,2	12,10,11,12	0.00217215	0.0347239	0.233	T72vT0 ribosomal depletion
chr9:34192687-34192687	A	G	+	2,3,3,5	12,11,9,16	0,0,2,2	8,14,15,12	0.0010948	0.0202586	0.146	T72vT0 ribosomal depletion
chr9:34431367-34431367	G	A	-	4,3,2,6	2,7,9,12	0,0,0,1	15,12,17,12	2.13067e-08	1.4212e-06	0.351	T72vT0 ribosomal depletion
chr9:36339473-36339473	G	A	-	1,8,6,7	18,54,59,56	0,0,0,0	26,56,63,77	9.40889e-09	4.21876e-07	0.096	T24vT0, poly-A enrichment
chr9:36339473-36339473	G	A	-	6,3,2,1	10,18,12,10	0,0,0,0	26,56,63,77	2.51295e-07	3.98008e-06	0.188	T72vT0, poly-A enrichment
chr9:37990818-37990818	G	A	-	3,3,0,1	6,0,8,9	0,0,0,0	3,9,10,11	0.00323344	0.0468174	0.358	T72vT0 ribosomal depletion
chr9:92276650-92276650	G	A	-	2,8,1,0	15,20,24,18	0,0,0,2	7,12,6,5	0.000653744	0.0136067	0.039	T72vT0 ribosomal depletion
chr9:98070828-98070828	A	G	+	7,6,2,4	12,15,12,9	0,1,1,2	10,8,17,11	6.3226e-05	0.00202106	0.196	T72vT0 ribosomal depletion
chr9:109542789-109542789	A	G	+	2,5,4,1	15,17,17,15	2,0,0,0	17,8,7,12	2.66989e-05	0.00652384	0.123	T72vT0 ribosomal depletion, mutant A3B
chr9:112386727-112386727	A	G	+	7,3,7,5	5,19,8,22	1,1,2,0	11,13,3,12	0.000352576	0.00839529	0.204	T72vT0 ribosomal depletion
chr9:113387232-113387232	G	A	-	9,9,9,8	220245244258	0,0,0,0	278272293289	4.43262e-07	1.46231e-05	0.035	T24vT0, poly-A enrichment
chr9:113387232-113387232	G	A	-	9,8,11,8	68,59,68,43	0,0,0,0	92,78,91,94	9.32587e-15	1.15839e-12	0.133	T72vT0 ribosomal depletion
chr9:113387232-113387232	G	A	-	29,27,18,21	178181146166	0,0,0,0	278272293289	0	0	0.123	T72vT0, poly-A enrichment
chr9:113396312-113396312	T	C	-	3,5,4,2	5,6,6,12	0,2,1,1	7,3,8,4	0.00454465	0.0465955	0.165	T24vT0, poly-A enrichment
chr9:113396312-113396312	T	C	-	1,3,2,4	10,2,0,4	0,2,1,1	7,3,8,4	0.00327081	0.0269934	0.37	T72vT0, poly-A enrichment
chr9:114442826-114442826	T	C	-	2,2,3,0	2,10,2,2	0,1,0,1	8,8,4,8	0.00115336	0.0210216	0.261	T72vT0 ribosomal depletion
chr9:114456593-114456593	T	C	-	1,2,2,1	7,14,10,5	0,0,0,0	4,7,9,14	0.00334683	0.0481498	0.146	T72vT0 ribosomal depletion
chr9:114609652-114609652	T	C	-	3,2,2,4	14,12,14,14	0,0,1,0	10,8,9,11	3.68298e-05	0.00125756	0.142	T72vT0 ribosomal depletion
chr9:114674080-114674080	A	G	+	5,3,6,1	6,9,7,7	2,0,0,2	8,3,5,6	0.00243503	0.0376963	0.21	T72vT0 ribosomal depletion
chr9:120412626-120412626	G	A	-	2,3,3,1	18,16,20,12	0,0,0,0	18,25,17,19	0.000462522	0.0103862	0.116	T72vT0 ribosomal depletion
chr9:120443220-120443220	G	A	-	1,8,5,5	31,39,40,36	0,0,0,0	25,36,27,50	1.07984e-07	3.97417e-06	0.109	T24vT0, poly-A enrichment
chr9:120443220-120443220	G	A	-	8,3,6,1	46,41,68,67	0,0,0,4	70,65,77,72	4.2819e-05	0.00144246	0.065	T72vT0 ribosomal depletion
chr9:120443220-120443220	G	A	-	6,4,1,4	12,15,22,14	0,0,0,0	25,36,27,50	1.04285e-08	1.89715e-07	0.202	T72vT0, poly-A enrichment
chr9:120823632-120823632	T	C	-	2,2,3,2	6,5,5,4	0,0,0,0	12,6,5,7	2.16407e-06	0.000102826	0.311	T72vT0 ribosomal depletion
chr9:120823632-120823632	T	C	-	4,0,1,4	4,7,5,5	0,0,0,1	3,6,7,11	3.68614e-05	0.000451244	0.257	T72vT0, poly-A enrichment
chr9:121179928-121179928	G	A	-	7,11,9,9	132230240186	0,0,0,0	158230398300	4.3831e-09	2.0672e-07	0.045	T24vT0, poly-A enrichment
chr9:121179928-121179928	G	A	-	3,7,9,3	12,26,29,17	0,0,0,0	33,26,26,18	1.07973e-10	9.98984e-09	0.2	T72vT0 ribosomal depletion
chr9:121288180-121288180	A	G	+	2,0,2,5	1,9,8,8	0,0,1,2	2,12,7,6	0.0041594	0.0434146	0.219	T24vT0, poly-A enrichment
chr9:121784105-121784105	A	G	+	6,5,3,7	182196167172	1,0,6,1	200244249245	0.00498627	0.038686	0.02	T72vT0, poly-A enrichment
chr9:122267274-122267274	A	G	+	4,2,3,1	8,6,8,11	0,0,1,2	6,4,9,6	0.00184906	0.0305862	0.147	T72vT0 ribosomal depletion
chr9:122901756-122901756	T	C	-	4,0,1,3	8,10,12,11	1,1,0,0	8,7,13,9	0.00286248	0.0427408	0.097	T72vT0 ribosomal depletion
chr9:122937738-122937738	A	G	+	1,3,0,5	6,5,13,11	0,1,0,0	9,9,14,5	0.000165151	0.00284193	0.183	T24vT0, poly-A enrichment
chr9:124625362-124625362	T	C	-	4,2,4,0	25,31,33,24	0,2,0,0	17,31,31,30	0.00109834	0.0480164	0.062	T72vT0 ribosomal depletion, mutant A3B
chr9:124737805-124737805	T	C	-	2,6,0,3	9,13,9,12	1,0,0,2	6,8,3,10	0.000884901	0.0172231	0.097	T72vT0 ribosomal depletion
chr9:124749699-124749699	T	C	-	2,6,1,1	13,8,14,9	0,1,0,1	11,12,15,10	8.57285e-05	0.0119701	0.14	T72vT0 ribosomal depletion, mutant A3B
chr9:125088338-125088338	T	C	-	5,1,2,0	15,6,15,4	2,0,0,0	8,6,7,5	0.00316217	0.0460603	0.078	T72vT0 ribosomal depletion
chr9:125149666-125149666	G	A	-	16,9,8,8	440422436459	2,0,0,3	458428470397	0.000221393	0.00363301	0.02	T24vT0, poly-A enrichment
chr9:125149666-125149666	G	A	-	15,15,12,14	300271303238	1,0,0,3	290296291266	1.15787e-11	1.14877e-09	0.045	T72vT0 ribosomal depletion
chr9:125149666-125149666	G	A	-	14,14,26,15	281345296263	2,0,0,3	458428470397	0	0	0.052	T72vT0, poly-A enrichment
chr9:125287454-125287454	A	G	+	4,3,1,1	19,5,6,16	0,2,0,0	5,10,11,3	0.00137965	0.0244264	0.146	T72vT0 ribosomal depletion
chr9:125651523-125651523	T	C	-	3,6,1,1	16,8,9,17	0,0,0,1	10,7,15,18	3.25139e-06	0.00176849	0.172	T72vT0 ribosomal depletion, mutant A3B
chr9:125940062-125940062	A	G	+	3,2,2,0	7,5,7,6	0,0,0,1	6,6,6,10	0.000702802	0.0378038	0.179	T72vT0 ribosomal depletion, mutant A3B
chr9:126449182-126449182	A	G	+	3,0,1,5	12,6,13,14	0,0,0,0	12,13,9,5	0.000211161	0.00544738	0.134	T72vT0 ribosomal depletion
chr9:126670736-126670736	A	G	+	1,4,3,2	11,14,6,15	0,0,0,0	5,1,6,9	1.83387e-05	0.000684719	0.189	T72vT0 ribosomal depletion
chr9:126989001-126989001	A	G	+	3,3,4,6	4,1,2,6	0,3,1,1	5,7,6,6	0.000185551	0.00487032	0.44	T72vT0 ribosomal depletion
chr9:127815137-127815137	A	G	+	4,5,6,4	55,45,55,46	0,0,1,4	42,29,54,53	0.000749444	0.015157	0.064	T72vT0 ribosomal depletion
chr9:127898028-127898028	T	C	-	2,1,1,3	6,8,5,4	1,0,1,0	7,5,8,4	0.000771235	0.0397484	0.18	T72vT0 ribosomal depletion, mutant A3B
chr9:127953823-127953823	G	A	-	4,5,1,8	77,106,108,93	1,0,0,0	88,115,85,111	0.000164199	0.00283321	0.043	T24vT0, poly-A enrichment
chr9:127953823-127953823	G	A	-	10,11,9,10	199183223185	0,0,0,2	157124160133	5.58579e-08	3.5176e-06	0.045	T72vT0 ribosomal depletion
chr9:127953823-127953823	G	A	-	18,11,19,9	124137105127	1,0,0,0	88,115,85,111	1.18794e-14	3.32397e-13	0.102	T72vT0, poly-A enrichment
chr9:128071508-128071508	A	G	+	2,1,1,2	6,6,4,10	0,0,1,0	16,7,7,1	0.000699764	0.0378038	0.159	T72vT0 ribosomal depletion, mutant A3B
chr9:128185669-128185669	G	A	-	12,9,5,6	312284298310	0,0,0,0	336265301265	0.000247898	0.00618275	0.026	T72vT0 ribosomal depletion
chr9:128185669-128185669	G	A	-	17,15,18,6	475506463443	0,0,0,0	429542494537	1.60777e-08	2.8628e-07	0.029	T72vT0, poly-A enrichment
chr9:128341461-128341461	C	T	+	5,6,6,6	21,11,24,26	0,0,0,1	10,11,8,6	3.41614e-07	1.9212e-05	0.197	T72vT0 ribosomal depletion
chr9:128596064-128596064	A	G	+	2,1,2,5	5,17,9,14	0,0,1,0	13,12,10,11	4.91335e-05	0.00163175	0.174	T72vT0 ribosomal depletion
chr9:128637558-128637558	T	C	-	3,3,2,0	7,4,1,6	0,1,0,0	5,4,7,4	0.000159782	0.00430131	0.299	T72vT0 ribosomal depletion
chr9:128808407-128808407	C	T	+	11,3,8,10	59,59,65,49	0,0,0,1	76,71,76,82	8.73857e-12	5.79567e-10	0.118	T24vT0, poly-A enrichment
chr9:128808407-128808407	C	T	+	5,3,17,4	33,31,26,42	0,0,0,1	76,71,76,82	9.21296e-12	2.12296e-10	0.173	T72vT0, poly-A enrichment
chr9:128907960-128907960	C	T	+	13,6,6,9	62,78,70,63	0,0,0,1	85,77,71,77	1.5341e-11	1.51252e-09	0.109	T72vT0 ribosomal depletion
chr9:128907960-128907960	C	T	+	2,12,9,5	45,61,36,45	0,0,1,0	47,69,60,70	1.45179e-10	3.05761e-09	0.123	T72vT0, poly-A enrichment
chr9:129326055-129326055	A	G	+	3,4,5,6	40,47,43,41	0,3,0,0	14,44,37,37	7.64948e-05	0.00143248	0.079	T24vT0, poly-A enrichment
chr9:129326055-129326055	A	G	+	3,2,2,5	21,19,20,20	0,3,0,0	14,44,37,37	0.000108372	0.00122933	0.112	T72vT0, poly-A enrichment
chr9:129499630-129499630	A	G	+	0,2,3,5	17,21,23,28	1,1,0,0	30,29,30,21	0.000340218	0.0251082	0.072	T72vT0 ribosomal depletion, mutant A3B
chr9:129738460-129738460	G	A	-	25,5,4,7	89,36,37,27	1,0,1,0	113,40,51,37	1.24456e-13	9.78286e-12	0.154	T24vT0, poly-A enrichment
chr9:129738460-129738460	G	A	-	15,17,29,10	46,42,47,55	0,2,0,0	22,12,19,10	6.91144e-10	5.79936e-08	0.232	T72vT0 ribosomal depletion
chr9:129738460-129738460	G	A	-	27,26,34,34	109113112115	1,0,1,0	113,40,51,37	0	0	0.205	T72vT0, poly-A enrichment
chr9:129952140-129952140	T	C	-	0,4,1,2	3,2,6,2	1,0,0,0	6,6,4,10	0.000868239	0.0169931	0.292	T72vT0 ribosomal depletion
chr9:130123757-130123757	A	G	+	1,2,3,3	13,25,25,27	0,1,0,0	27,30,16,24	0.00223767	0.0355423	0.08	T72vT0 ribosomal depletion
chr9:130139155-130139155	C	T	+	9,5,9,8	219295313323	1,0,0,0	212338316334	0.000263958	0.00420155	0.026	T24vT0, poly-A enrichment
chr9:130139155-130139155	C	T	+	4,14,11,5	121148147135	1,0,0,2	191151165125	1.11674e-08	7.79496e-07	0.051	T72vT0 ribosomal depletion
chr9:130139155-130139155	C	T	+	13,5,17,11	194160191149	1,0,0,0	212338316334	1.34337e-14	3.72342e-13	0.06	T72vT0, poly-A enrichment
chr9:130604469-130604469	A	G	+	3,3,3,5	29,35,28,27	0,1,0,1	26,30,27,22	7.06368e-05	0.00220217	0.087	T72vT0 ribosomal depletion
chr9:130722559-130722559	A	G	+	6,1,2,2	10,10,8,9	1,0,0,2	6,10,10,8	0.000270279	0.0226199	0.126	T72vT0 ribosomal depletion, mutant A3B
chr9:130759824-130759824	A	G	+	8,2,1,1	5,6,3,10	0,1,2,0	5,2,7,7	0.000676201	0.014008	0.163	T72vT0 ribosomal depletion
chr9:130890319-130890319	A	G	+	2,2,6,2	6,11,18,16	0,0,2,0	1,9,4,10	0.000383229	0.00392993	0.108	T72vT0, poly-A enrichment
chr9:131462236-131462236	A	G	+	6,5,4,5	23,23,19,24	2,2,1,0	11,16,15,33	0.00064884	0.013539	0.101	T72vT0 ribosomal depletion
chr9:131499940-131499940	C	T	+	11,14,19,17	274281345337	0,0,0,0	241300272271	7.12652e-13	5.1562e-11	0.047	T24vT0, poly-A enrichment
chr9:131499940-131499940	C	T	+	22,25,15,20	169156148156	0,0,0,0	169168183178	0	0	0.115	T72vT0 ribosomal depletion
chr9:131499940-131499940	C	T	+	16,18,14,13	111115115104	0,0,0,0	241300272271	0	0	0.12	T72vT0, poly-A enrichment
chr9:131719750-131719750	T	C	-	0,2,0,7	4,6,6,5	0,0,0,0	5,6,11,6	0.000540132	0.0117041	0.208	T72vT0 ribosomal depletion
chr9:132273444-132273444	T	C	-	3,0,3,1	5,3,6,3	0,0,0,1	4,3,6,10	0.000694492	0.0142869	0.217	T72vT0 ribosomal depletion
chr9:132340509-132340509	A	T	-	2,3,3,1	7,14,13,6	1,0,0,0	21,9,14,14	1.63117e-05	0.00501577	0.171	T72vT0 ribosomal depletion, mutant A3B
chr9:132402162-132402162	C	T	-	3,3,7,3	36,38,26,30	1,4,1,0	61,23,37,34	0.00324444	0.0268511	0.066	T72vT0, poly-A enrichment
chr9:132690448-132690448	A	G	+	7,17,2,5	57,64,65,61	0,9,5,2	108103102111	0.000213894	0.00231463	0.07	T72vT0, poly-A enrichment
chr9:133350872-133350872	C	T	+	3,3,3,3	44,48,56,63	0,0,0,0	39,75,55,75	0.00219828	0.0257761	0.055	T24vT0, poly-A enrichment
chr9:133350872-133350872	C	T	+	2,1,3,3	39,27,33,30	0,0,0,0	39,75,55,75	0.0068312	0.0496783	0.065	T72vT0, poly-A enrichment
chr9:133362696-133362696	T	C	-	31,54,50,64	266372395402	30,37,27,29	224346359394	0.00450148	0.0462273	0.032	T24vT0, poly-A enrichment
chr9:133362696-133362696	T	C	-	56,81,71,59	327311359272	35,42,41,35	406331399357	1.642e-08	1.1117e-06	0.08	T72vT0 ribosomal depletion
chr9:133362696-133362696	T	C	-	56,56,51,30	257289250168	30,37,27,29	224346359394	6.07347e-08	1.02551e-06	0.077	T72vT0, poly-A enrichment
chr9:134138016-134138016	A	G	+	2,1,2,3	1,10,10,7	0,1,0,1	6,2,6,6	0.00150684	0.0261519	0.187	T72vT0 ribosomal depletion
chr9:134440435-134440435	C	T	+	7,6,5,8	167138166186	0,0,1,0	276283288318	6.14964e-06	8.42314e-05	0.037	T72vT0, poly-A enrichment
chr9:136353152-136353152	C	T	+	0,5,5,2	11,25,38,24	0,0,0,0	18,28,24,31	3.39225e-05	0.000701295	0.09	T24vT0, poly-A enrichment
chr9:136353152-136353152	C	T	+	4,7,5,1	20,17,20,19	0,0,0,0	18,28,24,31	1.31718e-08	2.38146e-07	0.177	T72vT0, poly-A enrichment
chr9:136426764-136426764	A	G	+	1,3,3,1	5,11,11,10	0,1,0,1	9,8,18,7	0.000417914	0.0286643	0.113	T72vT0 ribosomal depletion, mutant A3B
chr9:136441430-136441430	T	C	-	38,49,40,77	210191167172	22,44,40,56	218300290357	1.26471e-05	0.000166999	0.096	T72vT0, poly-A enrichment
chr9:136445642-136445642	T	C	-	2,2,2,4	5,7,8,13	0,0,0,1	7,16,10,5	1.43167e-05	0.000188199	0.194	T72vT0, poly-A enrichment
chr9:136826387-136826387	C	T	+	0,3,4,1	4,14,23,14	0,0,0,0	7,22,23,19	0.00312032	0.0344317	0.098	T24vT0, poly-A enrichment
chr9:137015781-137015781	G	A	-	10,7,10,4	317349309277	0,0,0,1	193355316411	0.000964506	0.00908243	0.023	T72vT0, poly-A enrichment
chr9:137038377-137038377	T	C	-	3,1,4,1	2,10,10,5	0,1,0,2	1,7,4,5	0.00119305	0.0152228	0.183	T24vT0, poly-A enrichment
chr9:137038717-137038717	T	C	-	1,2,4,1	20,14,11,21	0,0,0,0	10,8,9,6	0.00557328	0.0420933	0.121	T72vT0, poly-A enrichment
chr9:137044913-137044913	T	C	-	10,15,11,13	438399376435	1,2,2,1	234497645559	2.57389e-07	4.06564e-06	0.026	T72vT0, poly-A enrichment
chr9:137208582-137208582	A	G	+	3,2,1,3	11,14,15,7	1,0,0,0	3,31,22,17	0.000258408	0.00275573	0.113	T72vT0, poly-A enrichment
chr9:137510726-137510726	G	A	-	2,2,5,8	18,33,40,29	0,0,0,0	18,26,47,39	1.72909e-07	6.15034e-06	0.121	T24vT0, poly-A enrichment
chr9:137510726-137510726	G	A	-	5,2,5,5	21,20,21,7	0,0,0,0	18,26,47,39	3.14813e-09	6.02553e-08	0.223	T72vT0, poly-A enrichment
chr9:137620661-137620661	A	G	+	2,6,3,7	6,6,9,6	3,0,1,0	5,5,9,6	0.000427332	0.00433679	0.266	T72vT0, poly-A enrichment
chr9:137628466-137628466	A	G	+	2,1,7,0	4,12,12,10	0,1,0,1	9,5,10,4	0.00028618	0.0228335	0.103	T72vT0 ribosomal depletion, mutant A3B
chr9:137766337-137766337	A	G	+	2,2,3,3	7,2,13,19	0,0,1,0	10,9,11,13	6.77521e-06	0.00285257	0.241	T72vT0 ribosomal depletion, mutant A3B
chr10:136141-136141	A	G	+	14,11,14,17	50,40,54,52	2,2,2,8	36,48,33,32	8.47163e-05	0.00254068	0.134	T72vT0 ribosomal depletion
chr10:141422-141422	A	G	+	0,2,2,4	1,7,15,10	0,1,0,1	1,6,11,4	0.00189442	0.0225454	0.071	T24vT0, poly-A enrichment
chr10:141422-141422	A	G	+	4,5,1,5	44,27,28,19	1,3,0,1	41,37,26,33	0.000661823	0.0367477	0.089	T72vT0 ribosomal depletion, mutant A3B
chr10:325098-325098	T	C	-	0,3,3,2	8,10,9,5	0,1,0,1	5,4,6,5	0.000669279	0.0369277	0.1	T72vT0 ribosomal depletion, mutant A3B
chr10:608775-608775	G	A	-	3,2,0,2	3,9,8,10	0,0,0,0	12,6,5,7	0.00350196	0.0498586	0.212	T72vT0 ribosomal depletion
chr10:921630-921630	G	A	-	6,8,1,4	132117118142	0,0,0,0	72,67,67,77	0.000883902	0.0172231	0.036	T72vT0 ribosomal depletion
chr10:928847-928847	T	C	-	8,8,9,14	15,15,22,14	2,0,4,1	5,11,16,10	0.000566254	0.0121698	0.227	T72vT0 ribosomal depletion
chr10:986012-986012	G	A	-	1,6,2,0	9,12,10,11	0,0,0,0	6,24,26,21	0.000197296	0.00217507	0.15	T72vT0, poly-A enrichment
chr10:5692773-5692773	A	G	+	1,6,6,4	50,52,47,36	1,0,0,0	44,26,44,21	1.51432e-05	0.000582643	0.079	T72vT0 ribosomal depletion
chr10:5722183-5722183	A	G	+	3,2,5,5	29,41,23,28	0,0,0,0	25,16,17,21	3.35065e-06	0.000152764	0.118	T72vT0 ribosomal depletion
chr10:6176461-6176461	A	G	+	3,4,0,5	3,18,14,9	0,3,0,0	8,18,8,8	0.000342003	0.00520941	0.224	T24vT0, poly-A enrichment
chr10:6181241-6181241	A	G	+	1,3,5,5	13,5,6,6	0,0,5,0	3,21,11,9	0.00130418	0.011974	0.261	T72vT0, poly-A enrichment
chr10:6217438-6217438	C	T	+	3,3,2,3	2,43,44,37	0,0,0,0	24,73,80,72	0.00132906	0.0166577	0.196	T24vT0, poly-A enrichment
chr10:6217438-6217438	C	T	+	20,12,24,12	51,41,72,56	0,0,0,0	93,97,100,84	0	0	0.234	T72vT0 ribosomal depletion
chr10:6217438-6217438	C	T	+	5,3,6,3	24,22,27,22	0,0,0,0	24,73,80,72	1.63632e-09	3.24831e-08	0.149	T72vT0, poly-A enrichment
chr10:6218041-6218041	C	T	+	3,3,3,3	12,52,34,25	0,0,0,0	23,65,55,59	6.4171e-05	0.00122885	0.111	T24vT0, poly-A enrichment
chr10:6218041-6218041	C	T	+	10,9,7,10	55,64,59,65	0,0,0,0	86,88,94,99	9.10383e-15	1.13528e-12	0.129	T72vT0 ribosomal depletion
chr10:6218041-6218041	C	T	+	2,3,3,2	17,26,18,23	0,0,0,0	23,65,55,59	9.41035e-05	0.00107998	0.108	T72vT0, poly-A enrichment
chr10:6293410-6293410	A	G	+	1,2,2,4	3,8,5,10	1,0,0,2	4,11,5,8	0.00126434	0.0227035	0.155	T72vT0 ribosomal depletion
chr10:7857179-7857179	A	G	+	2,11,7,7	1,2,0,1	6,1,4,6	2,3,7,1	0.000285635	0.0228335	0.292	T72vT0 ribosomal depletion, mutant A3B
chr10:8050853-8050853	G	A	-	14,14,19,13	58,55,70,48	0,0,0,0	100,84,65,80	0	0	0.206	T72vT0 ribosomal depletion
chr10:8050853-8050853	G	A	-	20,23,15,20	91,78,114,94	0,0,0,0	127154187121	0	0	0.175	T72vT0, poly-A enrichment
chr10:8052715-8052715	C	T	+	12,10,15,12	279450438386	0,1,0,0	221395351391	9.56248e-08	3.60262e-06	0.031	T24vT0, poly-A enrichment
chr10:8052715-8052715	C	T	+	8,9,12,12	262314300310	0,1,0,2	277346305319	2.8298e-07	1.62033e-05	0.031	T72vT0 ribosomal depletion
chr10:8052715-8052715	C	T	+	5,6,2,6	108125161150	0,1,0,0	221395351391	0.00124737	0.0115426	0.035	T72vT0, poly-A enrichment
chr10:8067176-8067176	C	T	+	3,3,3,4	27,18,29,25	0,0,0,0	38,47,38,41	3.24065e-06	8.74288e-05	0.119	T24vT0, poly-A enrichment
chr10:8067176-8067176	C	T	+	10,29,11,30	116121129110	0,0,0,0	107156155141	0	0	0.141	T72vT0 ribosomal depletion
chr10:8876897-8876897	G	A	-	1,11,5,12	8,23,16,22	0,1,2,7	58,62,63,29	7.54758e-08	4.6509e-06	0.196	T72vT0 ribosomal depletion
chr10:8973214-8973214	G	A	-	20,27,25,27	96,95,92,107	0,0,0,0	295240255153	0	0	0.202	T72vT0 ribosomal depletion
chr10:8976932-8976932	G	A	-	12,11,11,14	55,66,54,60	0,0,0,0	165174162134	0	0	0.17	T72vT0 ribosomal depletion
chr10:12012524-12012524	T	C	-	1,1,3,4	9,7,9,12	0,0,0,0	7,6,12,4	5.15099e-05	0.00169946	0.181	T72vT0 ribosomal depletion
chr10:12025294-12025294	T	C	-	15,8,6,8	8,6,7,18	6,9,0,3	25,9,14,17	0.00341958	0.0488937	0.287	T72vT0 ribosomal depletion
chr10:12072212-12072212	A	G	+	1,2,1,3	10,5,2,3	0,0,0,1	6,6,4,6	0.000308968	0.0240214	0.267	T72vT0 ribosomal depletion, mutant A3B
chr10:12086961-12086961	A	G	+	3,1,2,2	12,5,5,7	2,0,0,0	6,7,4,11	0.000328644	0.0248453	0.156	T72vT0 ribosomal depletion, mutant A3B
chr10:17389891-17389891	A	G	+	7,7,8,11	25,36,27,44	0,1,4,3	20,21,16,35	0.00108057	0.0200423	0.121	T72vT0 ribosomal depletion
chr10:18303486-18303486	T	C	-	6,3,2,2	9,6,5,7	0,1,2,1	9,10,12,5	0.000408944	0.00943691	0.21	T72vT0 ribosomal depletion
chr10:20854968-20854968	T	C	-	2,1,2,3	9,5,10,9	0,0,1,1	7,8,6,8	0.000355493	0.0255348	0.128	T72vT0 ribosomal depletion, mutant A3B
chr10:21137905-21137905	T	C	-	6,8,10,4	31,27,17,19	1,0,3,1	20,16,18,15	7.04862e-05	0.00219964	0.171	T72vT0 ribosomal depletion
chr10:21541347-21541347	A	G	+	2,1,2,3	9,11,2,5	0,1,0,1	6,6,4,12	0.0002342	0.0208594	0.23	T72vT0 ribosomal depletion, mutant A3B
chr10:21742732-21742732	C	T	+	7,7,8,10	21,20,21,26	0,0,0,0	23,25,39,21	3.17524e-14	3.83827e-12	0.266	T72vT0 ribosomal depletion
chr10:21742732-21742732	C	T	+	18,15,13,16	60,61,45,52	0,0,0,0	52,56,60,57	0	0	0.222	T72vT0, poly-A enrichment
chr10:21875415-21875415	T	C	-	1,3,1,4	11,9,9,12	0,0,0,0	4,12,14,8	8.29274e-05	0.00250369	0.171	T72vT0 ribosomal depletion
chr10:21877057-21877057	T	C	-	6,3,2,1	19,12,12,23	1,0,0,1	9,12,11,7	0.000270836	0.00666527	0.1	T72vT0 ribosomal depletion
chr10:27131934-27131934	G	A	-	13,10,16,13	221212205213	0,0,1,3	194215183166	7.62299e-11	7.1579e-09	0.052	T72vT0 ribosomal depletion
chr10:27131934-27131934	G	A	-	26,16,25,21	295245348325	0,1,0,0	350516418463	0	0	0.067	T72vT0, poly-A enrichment
chr10:27154344-27154344	G	A	-	5,6,8,9	96,80,82,87	0,0,0,0	148131157160	1.83864e-10	1.05465e-08	0.075	T24vT0, poly-A enrichment
chr10:27154344-27154344	G	A	-	12,13,15,10	47,29,13,26	0,0,0,0	67,75,69,83	0	0	0.332	T72vT0 ribosomal depletion
chr10:27537863-27537863	C	T	+	3,3,3,3	4,6,11,6	0,0,0,0	2,4,7,10	3.08447e-08	1.26702e-06	0.327	T24vT0, poly-A enrichment
chr10:27537863-27537863	C	T	+	3,5,3,2	10,10,6,7	0,0,0,0	18,26,20,23	2.77106e-09	2.12066e-07	0.28	T72vT0 ribosomal depletion
chr10:27538065-27538065	C	T	+	57,68,107,126	1036128412201240	1,0,0,0	1147148714681440	0	0	0.069	T24vT0, poly-A enrichment
chr10:27538065-27538065	C	T	+	18,21,25,21	72,115,99,103	0,0,0,0	284353335312	0	0	0.181	T72vT0 ribosomal depletion
chr10:27538065-27538065	C	T	+	65,57,71,85	403368362367	1,0,0,0	1147148714681440	0	0	0.156	T72vT0, poly-A enrichment
chr10:28051627-28051627	G	A	-	8,10,11,11	141170157139	0,0,0,0	211309254230	5.68434e-13	4.16002e-11	0.062	T24vT0, poly-A enrichment
chr10:28051627-28051627	G	A	-	23,19,28,21	120120124108	0,0,0,0	179198177145	0	0	0.161	T72vT0 ribosomal depletion
chr10:28051627-28051627	G	A	-	23,16,23,17	137123157106	0,0,0,0	211309254230	0	0	0.131	T72vT0, poly-A enrichment
chr10:31902953-31902953	T	C	-	4,5,6,2	19,21,13,22	0,1,0,0	22,25,14,12	2.18706e-07	1.26842e-05	0.182	T72vT0 ribosomal depletion
chr10:32911920-32911920	G	A	-	3,5,6,2	82,66,71,64	0,0,0,0	388369334362	8.63364e-05	0.00257702	0.053	T72vT0 ribosomal depletion
chr10:34600860-34600860	T	C	-	6,10,10,5	2,0,0,2	3,5,5,2	4,1,4,2	0.000103921	0.0128714	0.287	T72vT0 ribosomal depletion, mutant A3B
chr10:38055474-38055474	C	T	+	8,16,11,21	40,60,82,54	2,1,4,1	110178143140	0	0	0.179	T24vT0, poly-A enrichment
chr10:38055474-38055474	C	T	+	7,4,10,7	25,36,44,33	1,0,2,2	74,79,103,43	8.09602e-11	7.57951e-09	0.151	T72vT0 ribosomal depletion
chr10:38055474-38055474	C	T	+	13,10,22,19	42,49,60,57	2,1,4,1	110178143140	0	0	0.217	T72vT0, poly-A enrichment
chr10:38059269-38059269	C	T	+	3,2,3,3	36,41,46,54	0,0,0,0	96,94,85,94	0.00228628	0.0266607	0.059	T24vT0, poly-A enrichment
chr10:43356650-43356650	T	C	-	1,3,2,4	17,18,14,13	0,0,0,0	5,10,4,14	8.90548e-05	0.00264814	0.14	T72vT0 ribosomal depletion
chr10:59809719-59809719	T	C	-	3,1,0,5	15,12,14,18	0,0,0,2	15,12,18,8	0.00200254	0.0325503	0.065	T72vT0 ribosomal depletion
chr10:59809880-59809880	T	C	-	1,1,3,1	4,3,7,2	0,0,0,0	4,10,6,4	0.00225191	0.0196033	0.271	T72vT0, poly-A enrichment
chr10:63261332-63261332	T	C	-	1,2,1,2	9,11,8,13	0,0,0,1	11,8,8,3	0.00322749	0.0467527	0.062	T72vT0 ribosomal depletion
chr10:63279696-63279696	T	C	-	1,1,3,3	12,10,6,11	1,0,0,0	4,6,7,6	0.000954236	0.0182351	0.129	T72vT0 ribosomal depletion
chr10:63347720-63347720	T	C	-	4,1,4,4	11,7,10,13	0,0,2,1	16,7,12,17	4.30192e-05	0.00144697	0.179	T72vT0 ribosomal depletion
chr10:63358508-63358508	T	C	-	3,2,0,4	4,9,10,13	0,1,0,2	2,9,9,9	0.000614008	0.0129405	0.141	T72vT0 ribosomal depletion
chr10:63363099-63363099	T	C	-	2,4,4,5	17,19,27,17	1,0,0,0	18,21,10,21	1.37087e-06	6.84352e-05	0.146	T72vT0 ribosomal depletion
chr10:63523451-63523451	A	G	+	2,3,1,3	2,11,10,12	1,0,0,0	6,7,3,5	4.72645e-05	0.0089206	0.216	T72vT0 ribosomal depletion, mutant A3B
chr10:67929716-67929716	T	C	-	2,1,0,5	11,6,5,11	0,0,1,0	8,9,12,5	0.000620822	0.00872576	0.133	T24vT0, poly-A enrichment
chr10:68341204-68341204	C	T	+	10,10,96,6	39,51,475,66	0,0,1,0	456632647652	0	0	0.154	T72vT0, poly-A enrichment
chr10:68347112-68347112	T	C	-	0,4,4,3	8,6,6,17	0,2,1,0	3,14,4,11	0.000500475	0.0110574	0.156	T72vT0 ribosomal depletion
chr10:68513095-68513095	T	C	-	2,0,4,2	6,10,9,16	0,2,0,0	17,11,13,20	0.00177878	0.0297564	0.129	T72vT0 ribosomal depletion
chr10:68777426-68777426	A	G	+	4,8,3,3	19,30,18,27	0,0,0,0	15,7,20,29	6.33787e-08	3.9596e-06	0.157	T72vT0 ribosomal depletion
chr10:68831218-68831218	A	G	+	4,2,0,2	7,3,3,4	1,0,0,0	4,5,5,6	9.1715e-05	0.00271445	0.224	T72vT0 ribosomal depletion
chr10:68990428-68990428	A	G	+	2,1,3,2	4,7,3,3	2,0,0,1	4,5,4,7	0.000804225	0.0403099	0.225	T72vT0 ribosomal depletion, mutant A3B
chr10:70204088-70204088	T	C	-	4,8,6,1	17,10,14,12	2,0,0,0	17,10,11,13	7.47075e-07	3.88948e-05	0.227	T72vT0 ribosomal depletion
chr10:71816568-71816568	G	A	-	8,25,26,24	355600606660	0,1,0,0	361594643785	1.08802e-14	9.48961e-13	0.034	T24vT0, poly-A enrichment
chr10:71816568-71816568	G	A	-	30,30,33,23	376362356295	0,0,0,0	412333309358	0	0	0.077	T72vT0 ribosomal depletion
chr10:71816568-71816568	G	A	-	33,28,30,29	459387419415	0,1,0,0	361594643785	0	0	0.066	T72vT0, poly-A enrichment
chr10:71849501-71849501	T	C	-	4,2,2,3	16,10,7,13	2,0,0,1	10,13,7,8	0.000293999	0.0233214	0.125	T72vT0 ribosomal depletion, mutant A3B
chr10:73551098-73551098	T	C	-	1,4,2,1	10,10,12,13	0,1,0,1	5,10,7,8	0.00294132	0.0435879	0.097	T72vT0 ribosomal depletion
chr10:73805278-73805278	T	C	-	1,1,3,7	1,6,6,2	0,5,0,0	2,2,10,12	0.00368998	0.039619	0.26	T24vT0, poly-A enrichment
chr10:74209638-74209638	A	G	+	4,0,2,2	11,15,11,9	0,0,0,0	9,16,8,9	0.00137953	0.0244264	0.151	T72vT0 ribosomal depletion
chr10:74421541-74421541	C	T	+	2,1,3,2	8,9,12,12	0,0,0,0	22,25,22,26	0.000910614	0.0175933	0.161	T72vT0 ribosomal depletion
chr10:74895617-74895617	A	G	+	3,1,2,1	14,13,13,8	0,0,1,0	3,3,6,8	0.00292579	0.0433986	0.087	T72vT0 ribosomal depletion
chr10:75124146-75124146	A	G	+	2,2,3,6	3,3,4,1	0,2,1,1	2,8,5,7	0.00015098	0.00410725	0.399	T72vT0 ribosomal depletion
chr10:75133650-75133650	A	G	+	3,0,2,2	8,12,2,5	0,0,1,0	9,3,6,6	0.00293476	0.0435111	0.229	T72vT0 ribosomal depletion
chr10:77403108-77403108	T	C	-	3,4,2,3	5,6,6,3	2,1,1,0	17,11,17,13	1.36049e-05	0.000527962	0.32	T72vT0 ribosomal depletion
chr10:77494102-77494102	G	A	-	1,3,0,6	23,20,24,31	0,0,0,1	32,41,48,21	0.000771303	0.0154506	0.072	T72vT0 ribosomal depletion
chr10:77527919-77527919	T	C	-	0,3,1,6	33,26,26,22	0,0,0,0	46,34,36,39	0.00123628	0.0223139	0.089	T72vT0 ribosomal depletion
chr10:77792272-77792272	G	A	-	21,11,16,14	717649660646	1,2,0,0	562451517504	4.24592e-06	0.000189475	0.021	T72vT0 ribosomal depletion
chr10:77792272-77792272	G	A	-	9,17,15,12	145360373349	1,0,1,0	210274422444	4.26151e-11	9.41378e-10	0.042	T72vT0, poly-A enrichment
chr10:78017606-78017606	G	A	-	5,0,5,6	55,106,106,73	0,0,0,0	94,89,97,102	0.000411605	0.00610884	0.051	T24vT0, poly-A enrichment
chr10:78017606-78017606	G	A	-	6,4,6,12	110121112122	0,0,0,4	130100113121	2.05586e-06	9.85749e-05	0.048	T72vT0 ribosomal depletion
chr10:78017606-78017606	G	A	-	8,6,6,2	69,90,79,75	0,0,0,0	94,89,97,102	2.6562e-07	4.18441e-06	0.066	T72vT0, poly-A enrichment
chr10:79062672-79062672	T	C	-	1,2,6,1	11,8,8,12	1,1,0,0	5,9,9,9	0.000374283	0.00879741	0.131	T72vT0 ribosomal depletion
chr10:79145742-79145742	A	G	+	1,6,3,2	23,32,33,35	1,0,0,1	6,6,15,15	0.00245411	0.0379544	0.033	T72vT0 ribosomal depletion
chr10:80523615-80523615	A	G	+	2,1,2,2	4,6,9,3	0,0,0,0	4,6,6,5	0.00114535	0.0208999	0.265	T72vT0 ribosomal depletion
chr10:84152792-84152792	C	T	+	17,11,16,9	622643679648	4,1,2,0	1144114310201110	0.000311301	0.00327228	0.018	T72vT0, poly-A enrichment
chr10:84380774-84380774	A	G	+	4,5,3,4	6,13,20,8	2,1,0,1	14,19,8,11	0.00013142	0.0036639	0.221	T72vT0 ribosomal depletion
chr10:84380824-84380824	A	G	+	8,7,9,4	8,14,11,6	1,0,0,4	14,14,9,14	7.13179e-07	3.72169e-05	0.349	T72vT0 ribosomal depletion
chr10:86448644-86448644	T	C	-	4,1,4,0	17,23,22,15	0,1,0,0	7,11,4,12	0.000898189	0.0431241	0.076	T72vT0 ribosomal depletion, mutant A3B
chr10:86511783-86511783	T	C	-	1,2,4,3	32,21,34,37	0,2,0,0	32,23,28,36	0.00327872	0.047386	0.054	T72vT0 ribosomal depletion
chr10:86770318-86770318	A	G	+	4,5,5,5	45,36,34,32	2,1,1,0	37,27,39,33	6.6083e-05	0.0020954	0.089	T72vT0 ribosomal depletion
chr10:86926499-86926499	A	G	+	8,4,10,6	4,5,7,4	4,4,3,4	5,10,9,13	0.00276133	0.0312281	0.271	T24vT0, poly-A enrichment
chr10:87105868-87105868	A	G	+	5,2,1,3	24,25,14,24	0,0,0,1	11,14,11,23	0.000230663	0.00581347	0.096	T72vT0 ribosomal depletion
chr10:87110024-87110024	A	G	+	1,2,4,5	23,29,29,37	0,0,0,0	14,14,18,21	0.000128582	0.00359322	0.087	T72vT0 ribosomal depletion
chr10:87887789-87887789	C	T	+	4,6,12,5	15,16,28,18	0,0,0,0	15,14,30,24	4.01346e-12	4.13806e-10	0.25	T72vT0 ribosomal depletion
chr10:92314849-92314849	A	G	+	1,1,5,1	10,7,10,11	2,0,0,0	16,4,9,16	0.000618261	0.0353235	0.13	T72vT0 ribosomal depletion, mutant A3B
chr10:92871345-92871345	A	G	+	1,4,1,2	4,2,2,5	1,0,0,1	5,4,7,4	3.06719e-05	0.00722238	0.28	T72vT0 ribosomal depletion, mutant A3B
chr10:93337523-93337523	G	A	-	2,2,3,3	20,34,22,32	0,0,0,0	17,44,28,35	0.000889546	0.0117749	0.088	T24vT0, poly-A enrichment
chr10:93337523-93337523	G	A	-	11,18,9,13	24,29,26,33	0,0,0,0	46,49,40,57	0	0	0.309	T72vT0 ribosomal depletion
chr10:93337523-93337523	G	A	-	6,3,6,8	13,17,18,26	0,0,0,0	17,44,28,35	4.28424e-12	1.0192e-10	0.238	T72vT0, poly-A enrichment
chr10:93394374-93394374	T	C	-	3,1,5,4	31,30,40,35	0,0,0,1	17,25,33,24	0.000131972	0.00367496	0.074	T72vT0 ribosomal depletion
chr10:93400441-93400441	T	C	-	10,4,4,3	16,10,17,13	0,1,0,0	19,11,9,10	8.23e-10	5.63076e-06	0.241	T72vT0 ribosomal depletion, mutant A3B
chr10:93441460-93441460	T	C	-	7,3,2,2	21,10,6,11	1,1,0,1	13,9,10,4	5.37626e-05	0.00941541	0.128	T72vT0 ribosomal depletion, mutant A3B
chr10:93682683-93682683	T	C	-	0,3,1,4	5,7,3,7	4,0,0,0	11,8,6,5	0.00108181	0.0477513	0.162	T72vT0 ribosomal depletion, mutant A3B
chr10:93694327-93694327	G	A	-	4,2,2,2	31,30,22,28	0,0,0,1	24,15,28,25	0.00139864	0.0246245	0.072	T72vT0 ribosomal depletion
chr10:94045851-94045851	A	G	+	2,4,3,1	11,11,13,12	1,0,1,0	6,6,6,11	0.000520959	0.0113589	0.1	T72vT0 ribosomal depletion
chr10:95675326-95675326	T	C	-	1,2,0,4	4,9,3,5	1,0,0,0	3,2,7,7	0.00256201	0.0392385	0.144	T72vT0 ribosomal depletion
chr10:96876738-96876738	A	G	+	0,2,3,2	9,5,5,6	0,1,0,0	4,3,6,8	0.00232167	0.0364241	0.165	T72vT0 ribosomal depletion
chr10:97224512-97224512	T	C	-	0,4,2,5	14,23,12,23	0,0,5,0	32,29,42,36	0.00218845	0.0191075	0.091	T72vT0, poly-A enrichment
chr10:97541268-97541268	A	G	+	3,4,1,2	2,3,1,5	0,2,1,1	2,6,1,10	0.002163	0.0346234	0.279	T72vT0 ribosomal depletion
chr10:98144125-98144125	A	G	+	6,4,1,6	16,18,10,15	0,0,0,0	14,12,13,22	7.18326e-09	5.19479e-07	0.208	T72vT0 ribosomal depletion
chr10:100361173-100361173	C	T	+	62,41,37,31	1215153517011450	0,0,0,2	1398165419511760	0	0	0.029	T24vT0, poly-A enrichment
chr10:100361173-100361173	C	T	+	45,43,53,37	229265285242	0,0,0,2	1398165419511760	0	0	0.148	T72vT0, poly-A enrichment
chr10:101007617-101007617	C	T	+	10,15,9,3	191270237233	0,0,0,0	201240266286	6.64177e-08	2.61038e-06	0.038	T24vT0, poly-A enrichment
chr10:101007617-101007617	C	T	+	38,43,41,38	145130135149	0,0,0,0	177162175160	0	0	0.223	T72vT0 ribosomal depletion
chr10:101007617-101007617	C	T	+	45,32,50,43	219217227224	0,0,0,0	201240266286	0	0	0.16	T72vT0, poly-A enrichment
chr10:101059424-101059424	G	A	-	1,1,1,1	5,5,4,3	0,0,1,0	3,9,7,9	0.00480699	0.037561	0.165	T72vT0, poly-A enrichment
chr10:101066087-101066087	C	T	+	5,21,16,21	237487474450	0,0,0,0	215469446484	1.09681e-11	7.12592e-10	0.035	T24vT0, poly-A enrichment
chr10:101066087-101066087	C	T	+	12,18,16,17	109,107,99,108	0,0,0,0	187173148181	0	0	0.13	T72vT0 ribosomal depletion
chr10:101066087-101066087	C	T	+	26,30,24,23	221233220213	0,0,0,0	215469446484	0	0	0.104	T72vT0, poly-A enrichment
chr10:101383896-101383896	A	G	+	3,2,1,4	5,11,10,11	0,0,0,0	5,4,7,13	5.39395e-06	0.000231221	0.222	T72vT0 ribosomal depletion
chr10:101408407-101408407	A	G	+	0,2,1,5	9,9,7,9	0,0,0,1	13,15,9,12	0.000245116	0.0213046	0.147	T72vT0 ribosomal depletion, mutant A3B
chr10:101688353-101688353	G	A	-	3,3,3,3	5,22,19,27	0,0,0,0	6,27,16,20	3.96374e-06	0.000104286	0.183	T24vT0, poly-A enrichment
chr10:101688353-101688353	G	A	-	6,6,5,6	36,39,32,36	1,0,0,0	77,61,55,57	2.45793e-10	2.17221e-08	0.135	T72vT0 ribosomal depletion
chr10:101785934-101785934	G	A	-	20,21,29,36	259339352336	0,0,0,0	307451491476	0	0	0.076	T24vT0, poly-A enrichment
chr10:101785934-101785934	G	A	-	41,35,42,27	138159146167	0,0,0,0	191204205188	0	0	0.193	T72vT0 ribosomal depletion
chr10:101785934-101785934	G	A	-	45,32,20,38	181182216175	0,0,0,0	307451491476	0	0	0.153	T72vT0, poly-A enrichment
chr10:101790963-101790963	G	A	-	17,6,9,11	158160142125	0,0,0,0	286307284297	2.22045e-15	2.96844e-13	0.068	T72vT0 ribosomal depletion
chr10:101790963-101790963	G	A	-	8,9,29,13	147134352156	0,0,0,0	318440389479	0	0	0.067	T72vT0, poly-A enrichment
chr10:101822449-101822449	T	C	-	3,5,0,0	17,13,9,13	0,0,1,0	27,6,25,12	0.00342787	0.0489584	0.097	T72vT0 ribosomal depletion
chr10:101883807-101883807	T	C	-	3,1,1,4	3,11,8,11	0,1,2,0	12,15,9,5	8.47094e-05	0.0119497	0.179	T72vT0 ribosomal depletion, mutant A3B
chr10:102106832-102106832	G	A	-	10,9,8,15	300271295275	0,0,0,8	235228281255	4.86385e-06	0.000212836	0.028	T72vT0 ribosomal depletion
chr10:102524279-102524279	A	G	+	1,4,2,2	11,6,9,18	0,0,0,0	7,13,8,14	0.000128176	0.00358824	0.191	T72vT0 ribosomal depletion
chr10:102525772-102525772	A	G	+	0,4,3,4	9,7,12,8	0,0,2,2	6,9,9,12	0.00342522	0.0489428	0.143	T72vT0 ribosomal depletion
chr10:102655155-102655155	C	T	+	11,17,10,11	316314362326	0,0,0,1	204187226187	9.25242e-08	5.62376e-06	0.035	T72vT0 ribosomal depletion
chr10:102655155-102655155	C	T	+	8,16,14,8	398465389391	0,0,0,0	175237258274	6.27223e-06	8.55119e-05	0.027	T72vT0, poly-A enrichment
chr10:102725638-102725638	A	G	+	4,2,2,1	7,12,2,4	0,0,0,2	6,6,8,1	0.000609363	0.0352568	0.135	T72vT0 ribosomal depletion, mutant A3B
chr10:102738860-102738860	C	T	+	19,25,26,24	217253256274	0,0,0,1	194331299330	0	0	0.085	T24vT0, poly-A enrichment
chr10:102738860-102738860	C	T	+	73,62,70,53	132146115140	0,0,0,0	107126110118	0	0	0.327	T72vT0 ribosomal depletion
chr10:102738860-102738860	C	T	+	67,55,80,82	191181212232	0,0,0,1	194331299330	0	0	0.256	T72vT0, poly-A enrichment
chr10:102876492-102876492	A	G	+	1,3,5,2	18,23,23,26	1,0,0,0	17,16,12,19	0.00025202	0.00626081	0.091	T72vT0 ribosomal depletion
chr10:102941041-102941041	A	G	+	3,2,0,3	8,16,14,10	0,0,0,0	5,8,8,5	0.00154751	0.0267122	0.154	T72vT0 ribosomal depletion
chr10:102968673-102968673	A	G	+	2,1,4,2	9,11,14,10	1,0,0,1	8,7,6,4	0.00114223	0.020855	0.086	T72vT0 ribosomal depletion
chr10:110925503-110925503	A	G	+	7,7,5,5	42,54,45,41	0,1,0,1	23,32,40,30	6.74832e-07	3.54259e-05	0.101	T72vT0 ribosomal depletion
chr10:110928030-110928030	C	T	+	2,2,5,2	7,8,12,7	0,0,0,0	2,6,8,10	1.26777e-06	6.35901e-05	0.235	T72vT0 ribosomal depletion
chr10:116900583-116900583	G	A	-	2,6,1,2	9,67,67,41	0,0,0,0	9,24,56,70	0.00457171	0.0467976	0.081	T24vT0, poly-A enrichment
chr10:116907922-116907922	G	A	-	3,2,1,3	10,8,9,10	0,0,0,0	6,17,6,13	3.90967e-05	0.00132777	0.19	T72vT0 ribosomal depletion
chr10:119139722-119139722	T	C	-	2,0,5,2	10,13,11,14	0,1,0,0	3,7,5,4	0.000551019	0.0119236	0.12	T72vT0 ribosomal depletion
chr10:124810264-124810264	A	G	+	3,1,1,2	8,3,6,4	0,0,1,0	4,6,5,7	0.00110506	0.0204245	0.208	T72vT0 ribosomal depletion
chr10:124938922-124938922	A	G	+	0,1,6,1	2,7,5,6	1,0,0,1	4,5,9,7	0.00196665	0.0320661	0.122	T72vT0 ribosomal depletion
chr10:124954060-124954060	A	G	+	1,2,2,3	19,10,9,10	1,0,0,0	12,13,8,9	0.000413576	0.0286124	0.138	T72vT0 ribosomal depletion, mutant A3B
chr10:125116241-125116241	T	C	-	3,4,3,9	29,32,42,24	0,4,1,0	24,22,25,27	0.001518	0.0263004	0.088	T72vT0 ribosomal depletion
chr10:126917420-126917420	C	T	+	17,14,14,16	136,97,110,141	0,0,0,0	124127124121	0	0	0.113	T72vT0 ribosomal depletion
chr10:126943968-126943968	C	T	+	2,6,1,1	13,37,43,35	0,0,0,0	16,50,39,35	0.00277229	0.0312964	0.081	T24vT0, poly-A enrichment
chr10:126943968-126943968	C	T	+	2,5,2,7	98100105122	0,0,0,0	119120119132	0.0031911	0.0464173	0.035	T72vT0 ribosomal depletion
chr10:128101379-128101379	G	A	-	6,6,7,11	175190187191	0,0,0,0	301252249246	5.88665e-07	1.89294e-05	0.039	T24vT0, poly-A enrichment
chr10:128101379-128101379	G	A	-	9,12,9,4	79,78,78,79	0,0,0,0	207217195198	1.66533e-15	2.24535e-13	0.097	T72vT0 ribosomal depletion
chr10:128101379-128101379	G	A	-	11,10,15,18	138171160177	0,0,0,0	301252249246	0	0	0.077	T72vT0, poly-A enrichment
chr10:132423363-132423363	C	T	+	7,7,5,2	11,17,8,20	0,0,0,0	3,5,8,7	8.5711e-09	6.07681e-07	0.289	T72vT0 ribosomal depletion
chr10:132423409-132423409	C	T	+	13,7,5,2	12,15,15,27	0,0,0,1	3,9,8,15	7.08011e-08	4.38856e-06	0.274	T72vT0 ribosomal depletion
chr10:133421126-133421126	A	G	+	6,7,6,8	88,72,83,80	1,1,2,5	81,76,88,92	0.000474362	0.0105992	0.053	T72vT0 ribosomal depletion
chr10:133421126-133421126	A	G	+	6,7,6,2	36,33,39,28	1,1,1,5	32,25,43,41	0.00448697	0.0356289	0.079	T72vT0, poly-A enrichment
chr11:494401-494401	T	C	-	3,2,5,3	14,14,7,9	0,3,0,0	8,3,8,8	0.00181323	0.0301886	0.117	T72vT0 ribosomal depletion
chr11:522166-522166	A	G	+	1,3,2,3	7,8,6,10	0,0,0,0	3,8,8,6	2.1211e-05	0.000776342	0.22	T72vT0 ribosomal depletion
chr11:711096-711096	C	T	+	6,6,10,9	17,21,36,26	0,0,0,0	44,48,46,33	2.22045e-15	2.96844e-13	0.239	T72vT0 ribosomal depletion
chr11:727597-727597	C	T	+	25,38,50,34	440552453480	0,0,0,0	503542639671	0	0	0.071	T24vT0, poly-A enrichment
chr11:727597-727597	C	T	+	38,29,17,31	112113121155	0,0,0,0	216220203217	0	0	0.187	T72vT0 ribosomal depletion
chr11:727597-727597	C	T	+	46,65,49,33	235251244247	0,0,0,0	503542639671	0	0	0.164	T72vT0, poly-A enrichment
chr11:761457-761457	A	G	+	3,0,4,0	4,5,8,4	0,0,1,0	10,17,6,9	0.00379557	0.03072	0.155	T72vT0, poly-A enrichment
chr11:830855-830855	C	T	+	4,10,11,14	65109130120	0,0,0,1	63164166149	1.1724e-12	8.2029e-11	0.079	T24vT0, poly-A enrichment
chr11:830855-830855	C	T	+	17,13,15,10	39,44,46,44	0,0,0,0	124,91,102,84	0	0	0.241	T72vT0 ribosomal depletion
chr11:830855-830855	C	T	+	17,19,10,17	61,65,56,50	0,0,0,1	63164166149	0	0	0.211	T72vT0, poly-A enrichment
chr11:844389-844389	C	T	+	1,10,1,2	9,29,33,26	0,0,0,1	26,33,50,39	3.74182e-06	0.000100102	0.108	T24vT0, poly-A enrichment
chr11:844389-844389	C	T	+	1,6,2,6	72,51,51,65	0,0,0,1	56,40,36,56	0.000256388	0.00633442	0.056	T72vT0 ribosomal depletion
chr11:1752465-1752465	G	A	-	3,5,4,5	21,77,67,69	0,0,0,0	1,23,20,23	0.000116489	0.00207755	0.077	T24vT0, poly-A enrichment
chr11:1752465-1752465	G	A	-	32,29,36,40	183166217192	0,0,0,0	72,47,40,73	0	0	0.153	T72vT0 ribosomal depletion
chr11:1752465-1752465	G	A	-	21,22,14,17	142153138134	0,0,0,0	1,23,20,23	3.13568e-08	5.41919e-07	0.115	T72vT0, poly-A enrichment
chr11:2941239-2941239	T	C	-	7,3,6,8	20,29,19,27	1,0,0,0	14,9,12,21	5.05523e-08	3.20266e-06	0.189	T72vT0 ribosomal depletion
chr11:3149940-3149940	G	A	-	11,5,4,4	8,5,6,4	0,0,0,3	8,10,6,11	8.14252e-09	5.81844e-07	0.441	T72vT0 ribosomal depletion
chr11:3715756-3715756	T	C	-	5,2,1,1	1,10,3,3	0,2,1,0	9,11,6,7	0.000201258	0.00524334	0.301	T72vT0 ribosomal depletion
chr11:8612346-8612346	G	A	-	3,3,3,3	28,31,17,34	0,0,0,0	21,21,32,26	4.93046e-05	0.000974914	0.104	T24vT0, poly-A enrichment
chr11:9254307-9254307	T	C	-	4,2,1,4	12,8,8,4	3,0,0,1	17,7,15,5	0.000375571	0.0266272	0.186	T72vT0 ribosomal depletion, mutant A3B
chr11:9588843-9588843	C	T	+	11,17,33,12	109210248225	0,0,0,0	123210208217	0	0	0.084	T24vT0, poly-A enrichment
chr11:9588843-9588843	C	T	+	33,38,29,26	58,60,53,63	0,0,0,0	70,79,90,87	0	0	0.349	T72vT0 ribosomal depletion
chr11:9588843-9588843	C	T	+	30,31,37,24	76,77,96,76	0,0,0,0	123210208217	0	0	0.272	T72vT0, poly-A enrichment
chr11:10861957-10861957	A	G	+	4,0,2,2	10,6,11,12	0,0,1,0	9,8,12,6	0.000874258	0.0170763	0.126	T72vT0 ribosomal depletion
chr11:14283965-14283965	T	C	-	4,1,4,3	5,6,2,7	0,0,0,2	7,3,5,5	2.02582e-06	0.00135221	0.317	T72vT0 ribosomal depletion, mutant A3B
chr11:17028336-17028336	A	G	+	2,4,0,1	6,4,3,3	0,0,1,0	8,12,5,10	0.00104735	0.0195659	0.208	T72vT0 ribosomal depletion
chr11:31684483-31684483	A	G	+	2,3,2,1	14,3,4,6	0,0,0,2	6,1,5,9	0.000215298	0.00553147	0.23	T72vT0 ribosomal depletion
chr11:33053407-33053407	A	G	+	3,1,3,2	3,2,3,5	0,0,0,0	5,6,4,5	2.43527e-07	1.40977e-05	0.405	T72vT0 ribosomal depletion
chr11:33139892-33139892	G	A	-	3,3,3,3	4,9,7,5	0,0,0,0	13,21,13,21	2.69604e-09	1.29065e-07	0.338	T24vT0, poly-A enrichment
chr11:33139892-33139892	G	A	-	1,3,3,4	4,11,11,13	0,0,0,0	12,25,18,7	7.13668e-07	3.72169e-05	0.216	T72vT0 ribosomal depletion
chr11:33734403-33734403	T	C	-	2,1,3,2	4,12,9,10	0,0,2,0	12,7,7,7	0.00148701	0.0258771	0.151	T72vT0 ribosomal depletion
chr11:34481543-34481543	G	A	-	3,4,4,5	47,93,97,72	0,0,0,0	46115129131	0.000175402	0.00297809	0.051	T24vT0, poly-A enrichment
chr11:34481543-34481543	G	A	-	5,4,3,4	30,37,38,25	0,0,0,0	59,65,60,40	2.05053e-07	1.19583e-05	0.113	T72vT0 ribosomal depletion
chr11:34481543-34481543	G	A	-	4,3,4,4	30,33,30,37	0,0,0,0	46115129131	2.71196e-07	4.24946e-06	0.104	T72vT0, poly-A enrichment
chr11:34639036-34639036	C	T	+	8,8,4,8	15,27,18,24	0,0,0,0	17,14,29,15	1.83938e-11	1.80225e-09	0.252	T72vT0 ribosomal depletion
chr11:36114950-36114950	A	G	+	1,3,1,4	19,17,19,25	0,0,1,0	23,12,16,21	0.00145201	0.0253659	0.082	T72vT0 ribosomal depletion
chr11:36207414-36207414	A	G	+	1,2,2,2	4,8,5,4	0,0,1,1	5,9,10,8	0.00105499	0.0196488	0.204	T72vT0 ribosomal depletion
chr11:43402844-43402844	C	T	+	0,3,3,3	2,3,3,4	0,0,0,0	6,6,8,4	8.72351e-07	2.68322e-05	0.357	T24vT0, poly-A enrichment
chr11:44981862-44981862	A	G	+	2,3,2,3	6,11,9,11	0,0,0,0	4,5,13,9	6.24349e-06	8.5318e-05	0.215	T72vT0, poly-A enrichment
chr11:45975134-45975134	T	C	-	4,1,1,2	6,9,6,9	0,0,1,0	7,2,6,7	0.000364913	0.00862398	0.17	T72vT0 ribosomal depletion
chr11:46563184-46563184	T	C	-	3,3,1,2	28,13,16,27	0,0,0,0	21,16,14,22	0.00171478	0.0289621	0.103	T72vT0 ribosomal depletion
chr11:46578089-46578089	T	C	-	3,8,2,3	30,32,27,28	0,2,0,0	18,21,22,33	1.91962e-05	0.000710843	0.092	T72vT0 ribosomal depletion
chr11:46841810-46841810	T	C	-	1,3,9,3	22,17,20,16	2,0,1,1	20,13,15,10	0.00151083	0.0262049	0.104	T72vT0 ribosomal depletion
chr11:47164154-47164154	T	C	-	1,3,6,2	37,34,28,28	0,1,0,1	13,8,5,15	0.00276333	0.0416809	0.044	T72vT0 ribosomal depletion
chr11:47454402-47454402	T	C	-	4,4,4,2	20,19,11,10	0,1,0,0	7,5,7,18	6.30973e-06	0.000266357	0.152	T72vT0 ribosomal depletion
chr11:47550223-47550223	T	C	-	1,5,2,9	18,8,14,23	1,1,0,0	30,20,19,27	4.60546e-07	2.527e-05	0.191	T72vT0 ribosomal depletion
chr11:47556867-47556867	T	C	-	4,15,6,13	3,1,2,6	7,6,3,3	7,9,4,9	0.000426629	0.00974666	0.341	T72vT0 ribosomal depletion
chr11:47560400-47560400	T	C	-	1,5,5,3	10,13,16,20	1,3,0,0	12,11,9,8	0.00115513	0.0496089	0.112	T72vT0 ribosomal depletion, mutant A3B
chr11:47738773-47738773	T	C	-	4,4,0,2	0,3,7,2	2,0,1,0	5,5,4,8	0.00016031	0.0043045	0.396	T72vT0 ribosomal depletion
chr11:47790218-47790218	T	C	-	2,3,1,3	13,14,7,8	0,1,0,1	11,11,13,10	0.000440895	0.00445903	0.133	T72vT0, poly-A enrichment
chr11:47841976-47841976	T	C	-	5,0,2,2	6,6,6,6	1,0,0,0	8,7,5,5	4.60405e-05	0.00153712	0.211	T72vT0 ribosomal depletion
chr11:57722270-57722270	A	G	+	2,1,1,3	4,5,4,6	0,0,1,0	2,5,6,7	0.000690528	0.0142534	0.223	T72vT0 ribosomal depletion
chr11:57740584-57740584	C	T	+	27,47,43,42	627816808887	1,0,1,1	735951940976	0	0	0.047	T24vT0, poly-A enrichment
chr11:57740584-57740584	C	T	+	35,37,41,34	225253246216	0,0,0,0	302274301288	0	0	0.135	T72vT0 ribosomal depletion
chr11:57740584-57740584	C	T	+	66,65,72,79	395373492445	1,0,1,1	735951940976	0	0	0.142	T72vT0, poly-A enrichment
chr11:57757431-57757431	A	G	+	2,4,6,2	17,8,10,20	0,0,1,2	15,13,15,9	8.53941e-05	0.00255615	0.165	T72vT0 ribosomal depletion
chr11:57773184-57773184	A	G	+	34,46,51,55	106,124,125,87	15,24,23,39	108113128108	0.000286342	0.00699232	0.119	T72vT0 ribosomal depletion
chr11:57776493-57776493	C	T	+	3,3,3,2	4,12,18,7	0,0,0,0	11,16,13,17	7.48784e-07	2.37189e-05	0.248	T24vT0, poly-A enrichment
chr11:59152461-59152461	C	T	+	30,31,31,14	406489490435	0,2,0,0	577736667724	0	0	0.054	T24vT0, poly-A enrichment
chr11:59152461-59152461	C	T	+	23,54,36,47	76,110,105,87	0,0,0,0	305350303283	0	0	0.292	T72vT0 ribosomal depletion
chr11:59152461-59152461	C	T	+	65,60,47,69	159121153199	0,2,0,0	577736667724	0	0	0.278	T72vT0, poly-A enrichment
chr11:59658133-59658133	T	C	-	0,3,1,4	8,5,10,17	1,0,0,1	5,11,6,15	0.00325505	0.0471087	0.107	T72vT0 ribosomal depletion
chr11:60925313-60925313	C	T	+	2,5,6,5	39,79,78,98	0,0,0,0	42,67,116,71	1.73959e-05	0.000384582	0.057	T24vT0, poly-A enrichment
chr11:60925313-60925313	C	T	+	15,11,17,13	49,41,42,44	0,0,0,0	102,85,97,87	0	0	0.241	T72vT0 ribosomal depletion
chr11:60925313-60925313	C	T	+	2,6,6,5	10,16,27,13	0,0,0,0	42,67,116,71	4.41425e-13	1.11915e-11	0.225	T72vT0, poly-A enrichment
chr11:61136446-61136446	T	C	-	1,0,5,3	5,5,4,11	0,1,0,0	4,12,15,11	9.2645e-05	0.00170977	0.215	T24vT0, poly-A enrichment
chr11:61256682-61256682	T	C	-	2,3,2,2	10,13,8,15	0,0,0,1	4,4,9,10	0.000230795	0.00581347	0.145	T72vT0 ribosomal depletion
chr11:61319200-61319200	T	C	-	4,6,3,10	3,5,3,7	0,0,1,3	7,3,5,6	7.78721e-06	0.000317835	0.426	T72vT0 ribosomal depletion
chr11:61453933-61453933	A	G	+	9,7,1,8	62,45,56,60	1,2,0,1	35,41,52,55	7.403e-06	0.000304186	0.076	T72vT0 ribosomal depletion
chr11:61460115-61460115	A	G	+	9,6,4,6	18,22,19,30	1,0,0,0	10,13,20,23	7.19532e-09	5.19479e-07	0.199	T72vT0 ribosomal depletion
chr11:61520169-61520169	T	C	-	0,4,4,7	13,8,6,8	0,0,1,1	7,3,3,10	2.16874e-05	0.000791028	0.215	T72vT0 ribosomal depletion
chr11:61525087-61525087	T	C	-	12,8,8,11	16,14,13,13	2,3,2,4	20,11,15,17	4.40829e-05	0.00147645	0.255	T72vT0 ribosomal depletion
chr11:62515983-62515983	G	A	-	26,18,14,36	852780785732	0,0,0,3	92691212031154	1.72862e-13	1.34221e-11	0.028	T24vT0, poly-A enrichment
chr11:62515983-62515983	G	A	-	21,33,29,29	189199256185	0,0,0,0	436397334408	0	0	0.12	T72vT0 ribosomal depletion
chr11:62516188-62516188	G	A	-	102,90,59,53	1331142014881590	0,0,3,0	1612187019261930	0	0	0.05	T24vT0, poly-A enrichment
chr11:62516188-62516188	G	A	-	147179188173	449352382405	1,0,0,0	9439681100820	0	0	0.303	T72vT0 ribosomal depletion
chr11:62516188-62516188	G	A	-	195298211215	624623662694	0,0,3,0	1612187019261930	0	0	0.26	T72vT0, poly-A enrichment
chr11:62529997-62529997	G	A	-	29,61,77,61	477652649648	0,0,0,0	6659739831062	0	0	0.084	T24vT0, poly-A enrichment
chr11:62529997-62529997	G	A	-	196136176209	498612635540	0,0,0,2	1250142512441120	0	0	0.24	T72vT0 ribosomal depletion
chr11:62529997-62529997	G	A	-	41,43,61,91	172194253298	0,0,0,0	6659739831062	0	0	0.201	T72vT0, poly-A enrichment
chr11:62583558-62583558	T	C	-	0,2,3,3	5,11,7,4	0,0,0,1	6,4,5,7	0.000364581	0.00862258	0.189	T72vT0 ribosomal depletion
chr11:62625209-62625209	G	A	-	45,33,29,32	1049117111021030	0,0,0,0	110110991135956	0	0	0.031	T72vT0 ribosomal depletion
chr11:62625209-62625209	G	A	-	39,33,46,37	1690157916771590	0,0,1,0	1930209320092100	6.4293e-13	1.61447e-11	0.023	T72vT0, poly-A enrichment
chr11:62625503-62625503	G	A	-	22,21,25,18	1250134911701160	1,0,0,0	1329123013521030	0.000374482	0.00879741	0.017	T72vT0 ribosomal depletion
chr11:62703857-62703857	T	C	-	2,1,1,5	7,14,7,12	0,0,0,1	5,7,6,5	0.000230878	0.00581347	0.135	T72vT0 ribosomal depletion
chr11:62823527-62823527	G	A	-	2,2,1,4	9,8,10,12	0,0,0,0	9,5,8,13	5.71097e-05	0.00185563	0.181	T72vT0 ribosomal depletion
chr11:62823527-62823527	G	A	-	3,2,2,2	10,12,11,11	0,0,0,0	6,8,20,12	6.17877e-05	0.000730512	0.17	T72vT0, poly-A enrichment
chr11:62852591-62852591	G	A	-	11,11,12,10	164167139175	0,0,0,0	167193217175	1.08935e-12	1.18514e-10	0.065	T72vT0 ribosomal depletion
chr11:62852591-62852591	G	A	-	26,36,44,37	377335469446	0,0,0,0	423526484493	0	0	0.081	T72vT0, poly-A enrichment
chr11:62853017-62853017	G	A	-	3,4,5,6	66,90,60,88	0,0,0,1	83,99,108,120	1.91055e-05	0.000415169	0.055	T24vT0, poly-A enrichment
chr11:62853017-62853017	G	A	-	3,6,6,6	31,31,28,31	0,0,0,0	36,43,36,35	1.37457e-09	1.09792e-07	0.147	T72vT0 ribosomal depletion
chr11:62853017-62853017	G	A	-	17,12,17,12	89,86,107,104	0,0,0,1	83,99,108,120	0	0	0.129	T72vT0, poly-A enrichment
chr11:62853703-62853703	G	A	-	2,3,3,2	17,46,46,33	0,0,0,0	36,45,53,50	0.00201102	0.0237115	0.071	T24vT0, poly-A enrichment
chr11:63606329-63606329	T	C	-	3,3,2,1	24,16,19,19	0,0,0,0	14,11,14,15	0.00102517	0.0192459	0.104	T72vT0 ribosomal depletion
chr11:63688496-63688496	A	G	+	4,2,3,3	6,10,7,10	1,0,0,1	7,5,6,5	1.92607e-05	0.000712398	0.201	T72vT0 ribosomal depletion
chr11:63703574-63703574	A	G	+	0,2,6,0	10,10,14,10	0,1,0,0	6,7,10,15	0.00313632	0.0457471	0.085	T72vT0 ribosomal depletion
chr11:63850854-63850854	A	G	+	4,3,1,4	7,8,7,4	0,2,0,2	5,12,4,9	0.00118084	0.0214729	0.234	T72vT0 ribosomal depletion
chr11:63886266-63886266	A	G	+	2,3,3,3	22,7,12,12	0,2,1,0	5,11,15,12	0.000408087	0.0284176	0.142	T72vT0 ribosomal depletion, mutant A3B
chr11:63947361-63947361	A	G	+	4,3,3,0	7,8,6,4	0,2,0,1	10,4,6,6	0.000154277	0.0161766	0.123	T72vT0 ribosomal depletion, mutant A3B
chr11:63968089-63968089	A	G	+	0,2,1,5	7,11,21,14	1,0,0,0	2,2,5,19	0.00462069	0.0471473	0.032	T24vT0, poly-A enrichment
chr11:63968122-63968122	A	G	+	1,6,4,1	7,6,17,14	0,0,0,0	3,3,6,14	1.91042e-06	5.45454e-05	0.221	T24vT0, poly-A enrichment
chr11:63997920-63997920	A	G	+	16,15,9,13	407513550454	3,13,8,1	629580667679	2.87695e-05	0.000600575	0.018	T24vT0, poly-A enrichment
chr11:63999434-63999434	A	G	+	7,7,13,11	99,78,99,85	1,1,3,7	93,83,85,114	4.17114e-05	0.00140748	0.066	T72vT0 ribosomal depletion
chr11:63999434-63999434	A	G	+	5,2,7,4	32,33,40,19	1,3,0,2	30,34,58,55	0.000300276	0.00316772	0.092	T72vT0, poly-A enrichment
chr11:64001061-64001061	C	T	+	5,4,6,4	90,77,111,84	0,0,0,0	93,69,71,117	3.23722e-05	0.00112731	0.05	T72vT0 ribosomal depletion
chr11:64006877-64006877	C	T	+	10,9,8,10	72,74,79,86	0,0,0,0	88112126147	2.12053e-14	5.79545e-13	0.107	T72vT0, poly-A enrichment
chr11:64013811-64013811	A	G	+	4,5,6,10	58,49,55,58	0,1,3,1	26,24,32,41	0.00104744	0.0195659	0.063	T72vT0 ribosomal depletion
chr11:64097233-64097233	T	C	-	4,3,8,8	24,17,34,30	3,2,3,0	31,29,30,26	0.00111063	0.0205154	0.113	T72vT0 ribosomal depletion
chr11:64279921-64279921	T	C	-	1,3,1,2	6,7,5,10	0,0,0,0	9,3,2,6	0.00266776	0.0405042	0.194	T72vT0 ribosomal depletion
chr11:64795311-64795311	T	C	-	3,2,2,2	10,10,9,11	1,0,0,0	6,6,5,8	0.000169674	0.00452284	0.148	T72vT0 ribosomal depletion
chr11:65081951-65081951	T	C	-	4,1,1,1	8,3,8,7	0,0,1,0	9,9,4,13	0.000917482	0.0436674	0.155	T72vT0 ribosomal depletion, mutant A3B
chr11:65089953-65089953	A	G	+	6,5,9,8	20,16,16,24	0,2,0,3	17,7,16,21	4.38924e-05	0.00147163	0.183	T72vT0 ribosomal depletion
chr11:65286857-65286857	C	T	+	3,3,3,3	1,17,6,5	0,0,0,0	5,14,14,12	4.5665e-08	1.84863e-06	0.402	T24vT0, poly-A enrichment
chr11:65286857-65286857	C	T	+	8,4,9,8	38,36,37,33	0,0,0,0	49,39,38,33	7.7508e-12	7.86295e-10	0.166	T72vT0 ribosomal depletion
chr11:65425652-65425652	C	T	+	91,98,72,99	1716259925432620	0,1,1,0	3208471247134890	0	0	0.038	T24vT0, poly-A enrichment
chr11:65425652-65425652	C	T	+	229373408279	74512061067971	2,0,0,1	1891206117881410	0	0	0.242	T72vT0 ribosomal depletion
chr11:65425652-65425652	C	T	+	161141221217	492423735808	0,1,1,0	3208471247134890	0	0	0.235	T72vT0, poly-A enrichment
chr11:65428056-65428056	C	T	+	3,3,2,2	4,16,11,14	0,0,0,0	9,27,31,26	1.34935e-05	0.000306833	0.216	T24vT0, poly-A enrichment
chr11:65428056-65428056	C	T	+	299430396499	1220112910661100	0,0,0,0	1290146114671310	0	0	0.264	T72vT0 ribosomal depletion
chr11:65428056-65428056	C	T	+	1,2,4,4	4,7,9,8	0,0,0,0	9,27,31,26	6.70087e-08	1.12498e-06	0.266	T72vT0, poly-A enrichment
chr11:65431271-65431271	C	T	+	74,99,82,103	174241186185	1,0,0,0	316291266293	0	0	0.313	T72vT0 ribosomal depletion
chr11:65436573-65436573	C	T	+	3,3,3,3	3,20,25,20	0,0,0,0	23,45,49,53	3.21307e-06	8.70537e-05	0.217	T24vT0, poly-A enrichment
chr11:65436573-65436573	C	T	+	160146149167	1590149115341660	0,2,0,1	1584156917231440	0	0	0.09	T72vT0 ribosomal depletion
chr11:65436866-65436866	C	T	+	3,4,3,3	18,29,23,21	0,0,0,0	49,52,62,80	9.99322e-07	3.02985e-05	0.126	T24vT0, poly-A enrichment
chr11:65436866-65436866	C	T	+	74,69,63,61	1726199419621950	3,0,0,0	1659186518671630	0	0	0.034	T72vT0 ribosomal depletion
chr11:65441080-65441080	C	T	+	7,6,5,4	67,14,24,32	0,3,0,0	72,30,52,38	9.39999e-08	3.56249e-06	0.147	T24vT0, poly-A enrichment
chr11:65441080-65441080	C	T	+	1,4,2,6	8,12,17,21	0,3,0,0	72,30,52,38	1.2808e-06	1.89095e-05	0.149	T72vT0, poly-A enrichment
chr11:65442018-65442018	C	T	+	3,3,3,3	8,7,6,11	0,0,0,0	10,10,23,22	3.8726e-08	1.58057e-06	0.28	T24vT0, poly-A enrichment
chr11:65442018-65442018	C	T	+	102,78,67,78	1368123112901380	0,0,1,0	1317118412331200	0	0	0.058	T72vT0 ribosomal depletion
chr11:65443866-65443866	C	T	+	3,3,3,3	7,16,16,19	0,0,0,0	30,28,32,25	7.5386e-07	2.37615e-05	0.188	T24vT0, poly-A enrichment
chr11:65443866-65443866	C	T	+	135129130108	2692244925942730	0,0,2,0	2658233226052400	0	0	0.046	T72vT0 ribosomal depletion
chr11:65444937-65444937	C	T	+	3,3,3,2	7,3,15,11	0,0,0,0	18,17,19,14	3.40685e-07	1.14804e-05	0.28	T24vT0, poly-A enrichment
chr11:65444937-65444937	C	T	+	419418387349	10528539091022	0,0,0,1	1290115711621220	0	0	0.292	T72vT0 ribosomal depletion
chr11:65444937-65444937	C	T	+	3,4,3,3	11,18,8,13	0,0,0,0	18,17,19,14	1.79409e-07	2.88825e-06	0.214	T72vT0, poly-A enrichment
chr11:65498061-65498061	C	T	+	3,0,3,3	8,3,2,4	0,0,0,0	16,5,4,7	5.15957e-06	0.000131404	0.325	T24vT0, poly-A enrichment
chr11:65498061-65498061	C	T	+	2,2,2,5	4,3,3,5	0,0,0,0	16,5,4,7	2.32045e-09	4.51489e-08	0.408	T72vT0, poly-A enrichment
chr11:65498321-65498321	C	T	+	70,73,59,69	53,71,62,61	0,0,0,1	125145150138	0	0	0.522	T72vT0 ribosomal depletion
chr11:65498990-65498990	C	T	+	3,3,3,2	7,7,1,6	0,0,0,0	14,2,9,18	2.54991e-08	1.05424e-06	0.4	T24vT0, poly-A enrichment
chr11:65498990-65498990	C	T	+	58,47,39,46	218197205202	0,1,0,1	249284303242	0	0	0.185	T72vT0 ribosomal depletion
chr11:65499884-65499884	C	T	+	3,16,9,10	271464371328	0,1,0,4	375766625447	5.16904e-05	0.00170056	0.022	T72vT0 ribosomal depletion
chr11:65500618-65500618	C	T	+	122,136,107,85	7819676665407640	5,14,12,18	8060935599498590	1.08518e-06	5.51328e-05	0.014	T72vT0 ribosomal depletion
chr11:65500772-65500772	C	T	+	168165184182	6479585254416730	6,6,6,44	7139816383377110	0	0	0.026	T72vT0 ribosomal depletion
chr11:65500772-65500772	C	T	+	51,44,46,50	889899949931	2,0,2,0	3087133614991430	0	0	0.049	T72vT0, poly-A enrichment
chr11:65501742-65501742	C	T	+	16,16,14,14	8438188521003	0,0,1,0	1604118012761290	0.00488707	0.038136	0.017	T72vT0, poly-A enrichment
chr11:65504613-65504613	C	T	+	20,20,21,16	568599607575	1,0,0,0	782767794892	4.45199e-13	3.29603e-11	0.031	T24vT0, poly-A enrichment
chr11:65504613-65504613	C	T	+	23,39,31,39	200222246294	1,0,0,0	782767794892	0	0	0.12	T72vT0, poly-A enrichment
chr11:65539146-65539146	G	A	-	8,4,5,3	141138188130	0,0,0,0	113,71,95,80	0.00134893	0.0123079	0.033	T72vT0, poly-A enrichment
chr11:65545046-65545046	T	C	-	6,7,4,8	126128119147	0,3,1,2	53,102,123,98	0.000862909	0.00824464	0.031	T72vT0, poly-A enrichment
chr11:65567872-65567872	T	C	-	5,9,3,9	13,12,16,18	2,1,0,2	10,11,9,13	0.00034108	0.0081647	0.204	T72vT0 ribosomal depletion
chr11:65567872-65567872	T	C	-	4,9,9,12	12,13,13,14	4,4,0,2	10,11,13,9	0.00621222	0.0458005	0.199	T72vT0, poly-A enrichment
chr11:65632765-65632765	A	G	+	2,4,7,4	24,28,24,32	0,1,0,3	28,27,30,23	0.000125517	0.00352947	0.097	T72vT0 ribosomal depletion
chr11:65666433-65666433	A	G	+	1,6,5,2	6,1,7,8	0,1,1,1	5,5,1,6	0.000629935	0.00881494	0.202	T24vT0, poly-A enrichment
chr11:66073802-66073802	A	G	+	3,4,3,4	31,27,23,17	0,2,0,0	13,25,17,13	8.26338e-05	0.0025013	0.112	T72vT0 ribosomal depletion
chr11:66129168-66129168	A	G	+	4,7,9,8	4,6,4,6	0,0,3,2	6,7,6,15	6.05648e-07	3.22773e-05	0.463	T72vT0 ribosomal depletion
chr11:66196123-66196123	A	G	+	0,3,7,0	4,15,10,14	1,0,0,0	12,10,14,5	0.000255399	0.00631986	0.125	T72vT0 ribosomal depletion
chr11:66532674-66532674	C	T	+	6,13,3,3	66112119126	0,0,0,0	86146173186	1.10086e-07	4.02195e-06	0.059	T24vT0, poly-A enrichment
chr11:66532674-66532674	C	T	+	19,17,15,13	47,31,35,32	0,0,0,0	115,96,107,76	0	0	0.308	T72vT0 ribosomal depletion
chr11:66532674-66532674	C	T	+	15,16,14,20	33,35,36,40	0,0,0,0	86146173186	0	0	0.31	T72vT0, poly-A enrichment
chr11:66648463-66648463	A	G	+	1,3,1,3	1,11,8,14	0,0,0,0	4,15,9,9	0.000655325	0.00905088	0.25	T24vT0, poly-A enrichment
chr11:66791094-66791094	C	T	+	3,2,3,3	6,11,24,26	0,0,0,0	20,46,30,37	1.31616e-05	0.000302528	0.175	T24vT0, poly-A enrichment
chr11:66791094-66791094	C	T	+	4,10,11,12	13,19,19,21	0,0,0,0	29,31,18,27	1.11022e-16	1.61417e-14	0.328	T72vT0 ribosomal depletion
chr11:66791094-66791094	C	T	+	4,3,3,4	9,8,12,12	0,0,0,0	20,46,30,37	1.14229e-09	2.29081e-08	0.258	T72vT0, poly-A enrichment
chr11:66806131-66806131	C	T	+	3,6,2,4	14,16,10,14	0,0,0,0	24,34,21,16	5.07458e-09	3.75158e-07	0.21	T72vT0 ribosomal depletion
chr11:66836974-66836974	T	C	-	4,4,0,2	4,4,9,13	0,2,0,1	12,7,16,7	0.000335435	0.00806015	0.197	T72vT0 ribosomal depletion
chr11:67060608-67060608	A	G	+	3,4,2,0	13,9,12,23	1,0,0,0	13,12,11,18	0.000529745	0.0115186	0.142	T72vT0 ribosomal depletion
chr11:67063656-67063656	A	G	+	1,3,3,1	5,4,3,5	1,0,2,0	5,3,5,5	0.00257607	0.0294997	0.202	T24vT0, poly-A enrichment
chr11:67063756-67063756	A	G	+	2,3,1,1	8,0,1,6	1,0,1,0	7,6,8,3	0.000614344	0.00867301	0.402	T24vT0, poly-A enrichment
chr11:67064834-67064834	A	G	+	0,5,5,5	5,4,13,8	0,0,2,1	5,8,5,5	0.000269269	0.0042754	0.191	T24vT0, poly-A enrichment
chr11:67133795-67133795	A	G	+	0,4,3,0	3,2,5,12	0,0,1,0	5,2,3,15	0.00489967	0.0492831	0.198	T24vT0, poly-A enrichment
[truncated: 1,603 more rows]
