# Supplementary material for: Characterisation of APOBEC3B-Mediated RNA Editing in Breast Cancer Cells Reveals Regulatory Roles of NEAT1 and MALAT1 lncRNAs
Source: Research Square preprint supplement (doi:10.21203/rs.3.rs-3619470/v1), 2023-11-21
Supplement: Supplementary file 2 [file 5eb8c2c5d1dcc250385a4f60.xlsx]

## Sheet: T24VT0, A3B, Poly-A enrichment
ensembl_gene_id	baseMean	log2FoldChange	lfcSE	stat	pvalue	padj
ENSG00000253341	748.32	5.25352	0.152748	34.3934	3.16602e-259	2.10366e-255
ENSG00000221995	806.098	2.77266	0.0824482	33.629	6.31387e-248	3.3562e-244
ENSG00000130518	2567.64	1.70445	0.0558662	30.5095	1.94821e-204	8.62992e-201
ENSG00000139239	1056.07	4.18579	0.13939	30.0293	4.06642e-198	1.54396e-194
ENSG00000278341	793.626	2.36249	0.0810472	29.1496	8.45576e-187	2.80921e-183
ENSG00000180574	331.812	4.02117	0.140134	28.6951	4.39774e-181	1.2987e-177
ENSG00000176658	4863.5	-1.11474	0.0432973	-25.7462	3.55979e-146	9.4612e-143
ENSG00000180389	458.865	6.96094	0.280002	24.8603	2.00005e-136	4.83247e-133
ENSG00000168615	17215.8	0.77345	0.031879	24.262	4.9356e-130	1.09315e-126
ENSG00000168916	1658.95	1.33595	0.0569357	23.4641	9.48332e-122	1.93883e-118
ENSG00000235297	339.905	6.42989	0.274351	23.4367	1.80608e-121	3.42872e-118
ENSG00000217241	504.022	5.39894	0.235407	22.9345	2.10388e-116	3.7278e-113
ENSG00000261888	313.662	2.6154	0.116852	22.3822	5.86136e-111	9.73645e-108
ENSG00000101203	400.005	6.02466	0.272823	22.0827	4.63967e-108	7.25372e-105
ENSG00000078018	1029.79	-1.3686	0.0622202	-21.9962	3.13424e-107	4.62787e-104
ENSG00000257288	391.345	1.9892	0.0907535	21.9187	1.7243e-106	2.41202e-103
ENSG00000215817	208.209	3.88649	0.177683	21.8732	4.67704e-106	6.21532e-103
ENSG00000223599	186.038	3.39478	0.160399	21.1645	2.02708e-99	2.56551e-96
ENSG00000131471	244.79	2.7562	0.13048	21.1236	4.82774e-99	5.83235e-96
ENSG00000115461	45827.3	-0.827727	0.0394548	-20.9791	1.01778e-97	1.17612e-94
ENSG00000185862	220.802	5.58282	0.267317	20.8847	7.38031e-97	8.17308e-94
ENSG00000232931	401.486	-2.07916	0.101196	-20.5459	8.3697e-94	8.89799e-91
ENSG00000256745	273.513	3.90142	0.197375	19.7665	5.78719e-87	5.91584e-84
ENSG00000122376	1665.78	-1.01397	0.0517003	-19.6125	1.20857e-85	1.18969e-82
ENSG00000261612	193.761	5.6493	0.291695	19.3672	1.4604e-83	1.38623e-80
ENSG00000232044	169.428	3.401	0.176075	19.3157	3.96455e-83	3.63344e-80
ENSG00000177119	7697.81	-0.646353	0.0336795	-19.1913	4.37586e-82	3.87672e-79
ENSG00000267185	368.28	4.69008	0.244465	19.185	4.93566e-82	4.23162e-79
ENSG00000164976	8703.5	0.691058	0.0364793	18.9439	4.96315e-80	4.12221e-77
ENSG00000226332	955.261	1.28674	0.0680596	18.9061	1.01622e-79	8.18454e-77
ENSG00000262904	128.207	3.90422	0.209317	18.6522	1.2121e-77	9.47504e-75
ENSG00000067829	1212.67	-1.04961	0.0562953	-18.6448	1.39167e-77	1.05679e-74
ENSG00000170049	600.469	1.27394	0.0683582	18.6363	1.63133e-77	1.20438e-74
ENSG00000198353	1036.54	-1.32366	0.0711187	-18.612	2.56741e-77	1.84423e-74
ENSG00000225355	374.102	7.87993	0.423462	18.6083	2.75041e-77	1.9237e-74
ENSG00000133136	487.993	8.64037	0.464807	18.5892	3.93244e-77	2.6799e-74
ENSG00000245532	80949.5	-1.18025	0.0636873	-18.5319	1.14136e-76	7.58375e-74
ENSG00000130649	155.873	-2.68083	0.147204	-18.2117	4.16711e-74	2.7013e-71
ENSG00000250526	349.437	8.02148	0.442858	18.113	2.51673e-73	1.59261e-70
ENSG00000068976	231.853	2.49893	0.143263	17.4429	3.89619e-68	2.40821e-65
ENSG00000124399	393.934	8.20074	0.470857	17.4166	6.16847e-68	3.72603e-65
ENSG00000166004	5910.03	1.15592	0.0681187	16.9692	1.38878e-64	8.20243e-62
ENSG00000244242	494.731	1.44849	0.0856819	16.9054	4.10702e-64	2.37297e-61
ENSG00000272512	299.573	2.34904	0.139023	16.8968	4.75341e-64	2.688e-61
ENSG00000122741	1450.49	-0.836618	0.0497207	-16.8263	1.56459e-63	8.66327e-61
ENSG00000153531	877.628	0.986992	0.0595059	16.5865	8.73177e-62	4.73618e-59
ENSG00000233328	182.13	6.27687	0.378789	16.5709	1.13131e-61	6.01361e-59
ENSG00000166126	178.852	3.03444	0.184859	16.4149	1.49591e-60	7.79575e-58
ENSG00000128872	942.613	-0.906995	0.0555452	-16.3289	6.14401e-60	3.1403e-57
ENSG00000189180	3137.58	-0.891215	0.0547557	-16.2762	1.45626e-59	7.30274e-57
ENSG00000075884	212.209	-3.33354	0.204963	-16.2642	1.77293e-59	8.72612e-57
ENSG00000115561	2018.69	-0.95348	0.0587119	-16.24	2.63028e-59	1.27105e-56
ENSG00000277998	155.002	4.73776	0.292533	16.1956	5.41241e-59	2.56877e-56
ENSG00000174099	845.921	-1.33493	0.0828776	-16.1072	2.2713e-58	1.05906e-55
ENSG00000127578	590.468	2.35265	0.147756	15.9225	4.42111e-57	2.02594e-54
ENSG00000179954	234.291	2.28477	0.143649	15.9053	5.82549e-57	2.62423e-54
ENSG00000182472	120.107	3.50433	0.220595	15.8858	7.94834e-57	3.52085e-54
ENSG00000215915	757.065	1.96251	0.124341	15.7833	4.05485e-56	1.76672e-53
ENSG00000169169	231.315	2.09156	0.132806	15.749	6.97776e-56	2.99121e-53
ENSG00000170469	602.336	1.45076	0.0928326	15.6277	4.71787e-55	1.99034e-52
ENSG00000183098	1077.03	-1.30157	0.0833979	-15.6067	6.55291e-55	2.7213e-52
ENSG00000049769	572.492	1.32779	0.0856653	15.4997	3.48495e-54	1.42497e-51
ENSG00000180867	1140.16	2.37697	0.15346	15.4892	4.10197e-54	1.65185e-51
ENSG00000168398	290.997	-1.5253	0.100358	-15.1985	3.61954e-52	1.43582e-49
ENSG00000237276	167.198	1.93695	0.128441	15.0804	2.179e-51	8.5167e-49
ENSG00000215105	588.731	1.19198	0.0794238	15.0079	6.51844e-51	2.51083e-48
ENSG00000272031	1021.62	1.32155	0.0881866	14.9859	9.08247e-51	3.44849e-48
ENSG00000214717	900.913	1.02456	0.0688312	14.8852	4.11485e-50	1.54035e-47
ENSG00000205022	158.937	2.43048	0.164806	14.7475	3.19264e-49	1.17853e-46
ENSG00000135374	9702.92	-0.602389	0.0411515	-14.6383	1.59931e-48	5.82279e-46
ENSG00000198169	1637.42	-1.03346	0.0707321	-14.6109	2.39493e-48	8.60167e-46
ENSG00000244119	176.523	-1.80584	0.124877	-14.461	2.13645e-47	7.57099e-45
ENSG00000119227	347.468	-1.5914	0.110744	-14.3702	7.9636e-47	2.78495e-44
ENSG00000090060	7900.97	-0.662237	0.0461926	-14.3364	1.2954e-46	4.47133e-44
ENSG00000177694	545.755	-1.1113	0.0775406	-14.3318	1.38403e-46	4.71601e-44
ENSG00000054654	7861.45	-0.612839	0.0428135	-14.3142	1.78511e-46	6.00565e-44
ENSG00000131480	294.535	1.89706	0.132695	14.2964	2.30414e-46	7.65493e-44
ENSG00000113946	831.26	-1.43063	0.100309	-14.2621	3.76774e-46	1.23628e-43
ENSG00000280287	290.473	2.30286	0.161926	14.2216	6.72693e-46	2.18034e-43
ENSG00000072422	1231.05	-1.13011	0.0797686	-14.1674	1.45797e-45	4.66868e-43
ENSG00000255014	202.919	7.88297	0.558824	14.1063	3.4711e-45	1.09827e-42
ENSG00000107929	5946.24	-0.454489	0.0323193	-14.0625	6.46041e-45	2.02006e-42
ENSG00000254463	77.1735	2.92444	0.208426	14.0311	1.00567e-44	3.108e-42
ENSG00000111371	20949.2	-0.665723	0.0474714	-14.0237	1.11705e-44	3.41252e-42
ENSG00000214018	119.233	4.43468	0.318602	13.9192	4.8433e-44	1.46279e-41
ENSG00000126562	722.75	0.980002	0.0706693	13.8674	9.97661e-44	2.97931e-41
ENSG00000246982	738.303	-1.31705	0.0951602	-13.8403	1.45562e-43	4.29862e-41
ENSG00000086189	801.491	-1.05995	0.0767638	-13.808	2.28101e-43	6.66204e-41
ENSG00000196715	2114.62	-0.680631	0.0496892	-13.6978	1.0467e-42	3.02383e-40
ENSG00000139626	232.026	1.97924	0.144873	13.6619	1.71428e-42	4.89915e-40
ENSG00000138760	5512.13	-0.573733	0.0420192	-13.654	1.90975e-42	5.39972e-40
ENSG00000181260	97.85	5.61838	0.41184	13.6422	2.24783e-42	6.28871e-40
ENSG00000185052	1561.69	-0.930379	0.068218	-13.6383	2.36965e-42	6.56047e-40
ENSG00000225787	67.3485	4.59345	0.33814	13.5845	4.95117e-42	1.35662e-39
ENSG00000158467	752.774	-0.898711	0.0663091	-13.5534	7.56758e-42	2.05236e-39
ENSG00000156381	1601.38	0.833188	0.0614885	13.5503	7.88955e-42	2.11807e-39
ENSG00000059769	741.243	1.36842	0.101204	13.5214	1.16851e-41	3.10567e-39
ENSG00000185847	107.864	2.47127	0.183082	13.4982	1.60215e-41	4.21604e-39
ENSG00000179912	1442.43	-1.20445	0.0893416	-13.4814	2.01305e-41	5.19845e-39
ENSG00000071991	107.048	-2.19189	0.162587	-13.4813	2.0146e-41	5.19845e-39
ENSG00000102901	4590.41	0.952701	0.0708223	13.452	2.99709e-41	7.6593e-39
ENSG00000116679	3264.46	-0.520023	0.0388524	-13.3846	7.44124e-41	1.88356e-38
ENSG00000106688	167.652	-1.71176	0.128926	-13.2771	3.14484e-40	7.88523e-38
ENSG00000156171	1669.63	-0.837882	0.063436	-13.2083	7.85692e-40	1.9516e-37
ENSG00000258701	274.307	1.26678	0.0960042	13.1951	9.36538e-40	2.30475e-37
ENSG00000250091	64.1085	-3.89653	0.297959	-13.0774	4.43354e-39	1.08105e-36
ENSG00000188710	174.507	2.67633	0.205391	13.0304	8.21414e-39	1.9668e-36
ENSG00000264061	518.948	2.45685	0.188542	13.0308	8.17527e-39	1.9668e-36
ENSG00000204149	1631.23	-0.852757	0.0655178	-13.0156	9.96941e-39	2.36578e-36
ENSG00000214756	408.734	1.183	0.0909594	13.0058	1.13403e-38	2.66728e-36
ENSG00000185028	103.347	2.05672	0.158318	12.991	1.37528e-38	3.20633e-36
ENSG00000116016	20713.7	-0.571269	0.0441222	-12.9474	2.42945e-38	5.61478e-36
ENSG00000185008	635.118	-1.25027	0.0968464	-12.9098	3.96198e-38	9.07772e-36
ENSG00000171346	8089.88	1.33448	0.103407	12.9051	4.21112e-38	9.56609e-36
ENSG00000224660	671.624	-1.0158	0.0787885	-12.8928	4.94169e-38	1.11305e-35
ENSG00000188766	453.647	1.29326	0.101376	12.757	2.85077e-37	6.36703e-35
ENSG00000165300	470.739	1.21052	0.0949552	12.7483	3.18519e-37	7.05466e-35
ENSG00000271525	222.611	8.50494	0.670804	12.6787	7.75868e-37	1.70422e-34
ENSG00000227203	181.195	7.3481	0.579616	12.6775	7.87746e-37	1.71613e-34
ENSG00000108370	379.656	-1.18614	0.0937811	-12.648	1.14765e-36	2.47986e-34
ENSG00000146757	1181.54	0.867837	0.0686738	12.6371	1.31833e-36	2.8257e-34
ENSG00000010327	63.2836	3.23451	0.256426	12.6138	1.77254e-36	3.76885e-34
ENSG00000005020	1093.62	-0.934564	0.0743901	-12.563	3.37218e-36	7.11316e-34
ENSG00000260852	780.641	1.33157	0.10634	12.5219	5.66613e-36	1.18578e-33
ENSG00000256464	70.6591	5.43498	0.434929	12.4962	7.82638e-36	1.62507e-33
ENSG00000154118	76.8255	2.80397	0.224439	12.4932	8.12699e-36	1.67441e-33
ENSG00000163807	2003.94	-0.703752	0.0563589	-12.487	8.7953e-36	1.79817e-33
ENSG00000198113	332.527	1.88439	0.151145	12.4674	1.12412e-35	2.28069e-33
ENSG00000174021	1716.38	-1.41442	0.113562	-12.4551	1.31126e-35	2.62034e-33
ENSG00000114744	1889.57	-0.630553	0.0506257	-12.4552	1.31037e-35	2.62034e-33
ENSG00000099994	178.234	1.71885	0.138364	12.4226	1.96985e-35	3.90706e-33
ENSG00000139278	179.292	1.58895	0.12796	12.4176	2.09877e-35	4.13193e-33
ENSG00000035664	923.869	-1.18826	0.0958619	-12.3955	2.7636e-35	5.40081e-33
ENSG00000236548	105.769	-2.30553	0.186685	-12.3499	4.87869e-35	9.46465e-33
ENSG00000164056	598.719	0.841713	0.0683191	12.3203	7.04117e-35	1.35609e-32
ENSG00000133422	2269.99	-0.545349	0.0442837	-12.3149	7.53232e-35	1.44024e-32
ENSG00000172375	5243.13	0.416875	0.0340861	12.2301	2.14793e-34	4.07769e-32
ENSG00000255471	64.0462	-3.22844	0.264112	-12.2237	2.32131e-34	4.37559e-32
ENSG00000124193	9263.54	-0.436709	0.0357572	-12.2132	2.64423e-34	4.94917e-32
ENSG00000224781	108.438	4.24541	0.347723	12.2092	2.77672e-34	5.16082e-32
ENSG00000213199	877.665	1.09429	0.0896896	12.2009	3.07517e-34	5.67582e-32
ENSG00000126970	94.0328	-2.02218	0.166227	-12.1652	4.76269e-34	8.72984e-32
ENSG00000225402	63.8198	5.42024	0.445622	12.1633	4.87382e-34	8.87236e-32
ENSG00000198835	56.4323	3.66558	0.301755	12.1475	5.91226e-34	1.06895e-31
ENSG00000139323	1248.44	-0.736548	0.0607473	-12.1248	7.80584e-34	1.40178e-31
ENSG00000172530	1148.63	0.680236	0.0562309	12.0972	1.09293e-33	1.94953e-31
ENSG00000143457	1522.68	-0.722239	0.059739	-12.0899	1.19437e-33	2.11626e-31
ENSG00000254363	406.304	-1.02949	0.085159	-12.089	1.20733e-33	2.12506e-31
ENSG00000273203	101.436	-2.63885	0.218411	-12.082	1.31413e-33	2.29783e-31
ENSG00000245573	80.9241	-2.1984	0.182078	-12.0739	1.45042e-33	2.51956e-31
ENSG00000162415	150.15	-1.52176	0.126742	-12.0068	3.27315e-33	5.64894e-31
ENSG00000254548	221.001	1.89302	0.157824	11.9945	3.79659e-33	6.51006e-31
ENSG00000280339	61.9492	-3.6318	0.304254	-11.9367	7.61439e-33	1.29728e-30
ENSG00000250130	79.7114	4.27902	0.359076	11.9168	9.68102e-33	1.63887e-30
ENSG00000171401	85.8302	2.08619	0.17637	11.8285	2.78105e-32	4.67816e-30
ENSG00000075568	4237.54	0.660546	0.0559529	11.8054	3.66075e-32	6.1192e-30
ENSG00000156113	3840.57	-0.430349	0.036516	-11.7852	4.65217e-32	7.72783e-30
ENSG00000096063	2877.62	-0.587062	0.0498597	-11.7743	5.29742e-32	8.74501e-30
ENSG00000177570	220.62	-1.69522	0.144206	-11.7555	6.61292e-32	1.08493e-29
ENSG00000185442	3352.47	-0.659393	0.0562269	-11.7274	9.22989e-32	1.50498e-29
ENSG00000248854	126.941	7.69578	0.656894	11.7154	1.06275e-31	1.7223e-29
ENSG00000260633	83.6916	2.0142	0.171988	11.7113	1.1158e-31	1.79732e-29
ENSG00000124160	2961.1	0.501347	0.0429347	11.677	1.6717e-31	2.67654e-29
ENSG00000100577	1688.75	0.773089	0.0662484	11.6695	1.82389e-31	2.90271e-29
ENSG00000232630	277.345	1.49766	0.128415	11.6626	1.97849e-31	3.13001e-29
ENSG00000280020	61.6799	2.8961	0.248864	11.6373	2.664e-31	4.18957e-29
ENSG00000154127	360.441	-1.20078	0.103194	-11.6361	2.69955e-31	4.22051e-29
ENSG00000122176	196.644	1.68363	0.144844	11.6238	3.12081e-31	4.85057e-29
ENSG00000214078	4335.68	-0.561721	0.0485379	-11.5728	5.65895e-31	8.7444e-29
ENSG00000140675	56.5967	2.86018	0.247939	11.5358	8.7083e-31	1.33786e-28
ENSG00000197847	149.26	2.12385	0.184124	11.5349	8.80024e-31	1.34421e-28
ENSG00000100181	1507.18	-0.687696	0.0596439	-11.53	9.31183e-31	1.41423e-28
ENSG00000186951	749.515	-0.832061	0.0723374	-11.5025	1.28147e-30	1.93517e-28
ENSG00000180875	185.752	-1.38204	0.120302	-11.4881	1.51391e-30	2.27326e-28
ENSG00000206561	144.309	-1.58332	0.137896	-11.482	1.6249e-30	2.42622e-28
ENSG00000073331	491.758	-0.858251	0.0749711	-11.4477	2.41337e-30	3.58338e-28
ENSG00000267938	83.5242	2.1763	0.190232	11.4402	2.63151e-30	3.88557e-28
ENSG00000134375	2596.77	-0.458041	0.0400676	-11.4317	2.903e-30	4.26275e-28
ENSG00000074527	1440.87	-0.811415	0.0711129	-11.4102	3.71709e-30	5.42818e-28
ENSG00000184560	47.8252	4.22515	0.370895	11.3918	4.59521e-30	6.67386e-28
ENSG00000259581	49.6015	3.72344	0.327088	11.3836	5.04645e-30	7.28938e-28
ENSG00000272335	138.129	-2.12879	0.187682	-11.3425	8.07573e-30	1.1602e-27
ENSG00000119714	124.533	1.65581	0.146097	11.3336	8.94702e-30	1.27846e-27
ENSG00000169084	436.077	-1.70788	0.150846	-11.322	1.0216e-29	1.45198e-27
ENSG00000162461	201.576	1.88282	0.166576	11.3031	1.26732e-29	1.79164e-27
ENSG00000169962	306.538	2.65543	0.234959	11.3017	1.28724e-29	1.81017e-27
ENSG00000168928	49.8619	4.14071	0.367161	11.2776	1.69215e-29	2.36705e-27
ENSG00000196421	1280	1.84165	0.163474	11.2657	1.93792e-29	2.69665e-27
ENSG00000266242	44.8704	-3.39706	0.302286	-11.2379	2.65594e-29	3.67654e-27
ENSG00000267702	131.427	2.02929	0.180705	11.2298	2.91076e-29	4.0084e-27
ENSG00000164171	1732.75	-0.622233	0.0555092	-11.2095	3.66119e-29	5.01584e-27
ENSG00000241043	107.363	1.91152	0.170655	11.2011	4.02661e-29	5.48816e-27
ENSG00000183091	513.339	0.874878	0.0782661	11.1782	5.21122e-29	7.06652e-27
ENSG00000179387	1022.63	-0.90807	0.0813473	-11.1629	6.19545e-29	8.35851e-27
ENSG00000173991	126.588	1.63689	0.146802	11.1503	7.13577e-29	9.57851e-27
ENSG00000112972	4229.48	-0.405594	0.0363978	-11.1434	7.713e-29	1.03013e-26
ENSG00000260316	44.1378	4.34618	0.390247	11.137	8.28749e-29	1.10132e-26
ENSG00000151715	4647.09	-0.663296	0.0596303	-11.1235	9.64465e-29	1.2753e-26
ENSG00000173517	635.798	-1.08693	0.0978681	-11.1061	1.17185e-28	1.54185e-26
ENSG00000269318	131.153	1.83765	0.165798	11.0837	1.50487e-28	1.97026e-26
ENSG00000280206	269.774	1.17415	0.105941	11.083	1.51641e-28	1.97564e-26
ENSG00000156804	9658.09	-0.531753	0.0480052	-11.077	1.62229e-28	2.10328e-26
ENSG00000234488	373.066	11.2903	1.02329	11.0333	2.64046e-28	3.40671e-26
ENSG00000273599	526.647	1.7465	0.158587	11.0129	3.31264e-28	4.25331e-26
ENSG00000116106	1535.97	-0.648199	0.0589845	-10.9893	4.30153e-28	5.49645e-26
ENSG00000240399	78.6213	2.02104	0.183934	10.9879	4.37115e-28	5.55868e-26
ENSG00000116032	84.7251	2.20437	0.200641	10.9866	4.43181e-28	5.60898e-26
ENSG00000174177	1712.73	1.50012	0.136696	10.9741	5.08968e-28	6.41107e-26
ENSG00000279662	855.781	-0.787461	0.0717939	-10.9684	5.42529e-28	6.80157e-26
ENSG00000084733	2961.61	-0.775683	0.0707373	-10.9657	5.58804e-28	6.97272e-26
ENSG00000253797	1187	-0.665595	0.0607478	-10.9567	6.17144e-28	7.6647e-26
ENSG00000280033	78.0731	2.30383	0.210474	10.9459	6.95372e-28	8.5961e-26
ENSG00000164808	2322.8	-0.623477	0.0571556	-10.9084	1.05084e-27	1.29302e-25
ENSG00000204248	746.876	1.40353	0.128722	10.9035	1.10873e-27	1.35797e-25
ENSG00000167588	601.898	0.821056	0.0755593	10.8664	1.66677e-27	2.03209e-25
ENSG00000253540	460.22	1.3205	0.121795	10.842	2.1765e-27	2.64141e-25
ENSG00000182208	358.752	-0.956374	0.0884177	-10.8165	2.87427e-27	3.47238e-25
ENSG00000132849	6241.66	-0.351865	0.032537	-10.8143	2.94452e-27	3.54115e-25
ENSG00000144935	235.465	-1.51539	0.140189	-10.8096	3.09914e-27	3.71031e-25
ENSG00000237424	328.907	1.30247	0.120535	10.8057	3.23411e-27	3.85453e-25
ENSG00000267892	45.9508	3.07116	0.284591	10.7915	3.77569e-27	4.47992e-25
ENSG00000124225	2760.83	0.527152	0.0489438	10.7706	4.74146e-27	5.60083e-25
ENSG00000245869	87.7574	2.7704	0.257855	10.744	6.32216e-27	7.43497e-25
ENSG00000230550	102.217	1.67062	0.155518	10.7423	6.44325e-27	7.544e-25
ENSG00000275329	60.2134	2.34446	0.218506	10.7295	7.39813e-27	8.62401e-25
ENSG00000089127	1102.22	1.08945	0.101758	10.7063	9.51138e-27	1.1039e-24
ENSG00000066557	532.471	-0.731673	0.0683892	-10.6987	1.03252e-26	1.18875e-24
ENSG00000269959	554.018	0.934406	0.087339	10.6986	1.03319e-26	1.18875e-24
ENSG00000278952	132.648	1.72609	0.161447	10.6914	1.11713e-26	1.27978e-24
ENSG00000163762	83.4989	-1.93749	0.181389	-10.6814	1.24401e-26	1.41903e-24
ENSG00000153832	230.107	-1.17744	0.110332	-10.6718	1.37979e-26	1.56718e-24
ENSG00000228420	81.7306	-2.03567	0.190809	-10.6686	1.42697e-26	1.61387e-24
ENSG00000184441	324.837	1.32383	0.1241	10.6675	1.44526e-26	1.62764e-24
ENSG00000261068	653.344	0.790601	0.0741725	10.659	1.58356e-26	1.77586e-24
ENSG00000157514	1534.89	-0.5632	0.0528731	-10.6519	1.70807e-26	1.90744e-24
ENSG00000213513	99.9322	2.04068	0.191963	10.6306	2.14753e-26	2.38816e-24
ENSG00000183020	1470.37	-0.613675	0.0577936	-10.6184	2.44769e-26	2.71061e-24
ENSG00000139687	2484.24	-0.570006	0.0537072	-10.6132	2.58698e-26	2.85298e-24
ENSG00000171109	5544.45	-0.380876	0.0358944	-10.611	2.64855e-26	2.9088e-24
ENSG00000283413	1066.37	-1.30337	0.122985	-10.5978	3.05163e-26	3.33771e-24
ENSG00000234882	42.4672	4.28127	0.404238	10.591	3.28188e-26	3.57483e-24
ENSG00000171723	963.866	-0.981134	0.0931457	-10.5333	6.06506e-26	6.57947e-24
ENSG00000068366	200.253	-1.15419	0.109681	-10.5231	6.75846e-26	7.30189e-24
ENSG00000154229	351.996	-0.83885	0.0797396	-10.5199	6.99783e-26	7.52989e-24
ENSG00000250067	1620.32	0.80261	0.0763532	10.5118	7.62252e-26	8.169e-24
ENSG00000164494	469.745	-0.896448	0.0853107	-10.508	7.93314e-26	8.46775e-24
ENSG00000050748	2643.45	-0.418335	0.0398408	-10.5002	8.62333e-26	9.16764e-24
ENSG00000114270	2910.54	1.6377	0.156149	10.4881	9.80247e-26	1.03797e-23
ENSG00000175115	3811.45	-0.617061	0.0588748	-10.4809	1.05732e-25	1.11514e-23
ENSG00000251596	42.7829	3.43652	0.328153	10.4723	1.15761e-25	1.21609e-23
ENSG00000155097	4703.17	-0.412924	0.0394406	-10.4695	1.19244e-25	1.24774e-23
ENSG00000154930	2053.16	0.58638	0.056032	10.4651	1.24975e-25	1.30259e-23
ENSG00000279954	107.59	2.0293	0.193938	10.4637	1.26835e-25	1.31681e-23
ENSG00000102316	14697.2	0.406738	0.038908	10.4538	1.40716e-25	1.45524e-23
ENSG00000145730	3941.59	-0.506891	0.0485019	-10.451	1.45061e-25	1.49435e-23
ENSG00000141298	1371.87	-0.796312	0.0762591	-10.4422	1.59099e-25	1.63264e-23
ENSG00000277152	71.3764	1.99383	0.191405	10.4168	2.07774e-25	2.12393e-23
ENSG00000114200	227.395	-1.02708	0.0986996	-10.4061	2.32601e-25	2.36861e-23
ENSG00000145014	1209.75	1.11308	0.107115	10.3914	2.71268e-25	2.75182e-23
ENSG00000146242	3666.86	0.378922	0.036473	10.3891	2.77936e-25	2.80874e-23
ENSG00000139915	156.822	-1.3997	0.134777	-10.3853	2.89264e-25	2.91215e-23
ENSG00000277639	105.814	1.7763	0.171243	10.373	3.28971e-25	3.29939e-23
ENSG00000119699	6981.18	0.428651	0.0413413	10.3686	3.44606e-25	3.44321e-23
ENSG00000157601	4910.38	0.669486	0.0645761	10.3674	3.48889e-25	3.47295e-23
ENSG00000172086	344.559	-1.64791	0.158996	-10.3645	3.59741e-25	3.56761e-23
ENSG00000272808	257.725	1.06862	0.103329	10.3419	4.55279e-25	4.49829e-23
ENSG00000227890	140.103	10.6009	1.02515	10.3409	4.6027e-25	4.53076e-23
ENSG00000170270	322.618	-1.16061	0.112341	-10.3311	5.09754e-25	4.99935e-23
ENSG00000110448	207.723	1.60871	0.156344	10.2896	7.85114e-25	7.67161e-23
ENSG00000179023	2164.34	0.493378	0.0479775	10.2835	8.36074e-25	8.13963e-23
ENSG00000122484	754.542	-1.05883	0.103206	-10.2594	1.07352e-24	1.04132e-22
ENSG00000213516	988.497	0.547078	0.0533441	10.2556	1.11628e-24	1.07885e-22
ENSG00000198870	347.801	1.14852	0.112236	10.2331	1.40876e-24	1.35659e-22
ENSG00000204406	430.154	-0.884359	0.0865162	-10.2219	1.58227e-24	1.51818e-22
ENSG00000118094	61.978	3.59481	0.353168	10.1787	2.46751e-24	2.35905e-22
ENSG00000040731	527.925	-0.828427	0.0813965	-10.1777	2.49434e-24	2.37615e-22
ENSG00000170776	2996.18	0.520472	0.0511507	10.1753	2.55729e-24	2.42742e-22
ENSG00000173391	1567.79	-0.843819	0.0830696	-10.158	3.05326e-24	2.88789e-22
ENSG00000128513	875.933	-0.660911	0.0651991	-10.1368	3.79241e-24	3.57428e-22
ENSG00000240184	2375.13	0.472688	0.0466343	10.136	3.82258e-24	3.58999e-22
ENSG00000206530	1306.3	-0.587369	0.0579843	-10.1298	4.07517e-24	3.81373e-22
ENSG00000250133	547.924	0.994123	0.0982812	10.1151	4.73566e-24	4.41629e-22
ENSG00000109758	130.208	2.6224	0.259427	10.1084	5.06829e-24	4.70997e-22
ENSG00000186376	342.824	-0.865186	0.085649	-10.1015	5.43818e-24	5.03609e-22
ENSG00000196663	1142.34	-0.822044	0.0814376	-10.0942	5.86249e-24	5.41018e-22
ENSG00000173114	396.626	-0.930412	0.0924311	-10.066	7.80887e-24	7.18146e-22
ENSG00000109089	1847.64	0.503633	0.0500503	10.0625	8.08903e-24	7.41346e-22
ENSG00000148225	421.863	-0.801657	0.0801149	-10.0063	1.42947e-23	1.30559e-21
ENSG00000136997	893.826	-0.790351	0.0790144	-10.0026	1.48422e-23	1.35094e-21
ENSG00000136383	329.15	1.36362	0.136651	9.97888	1.88588e-23	1.71068e-21
ENSG00000174485	1422.1	-0.472001	0.0473529	-9.96774	2.10976e-23	1.90725e-21
ENSG00000274925	512.096	0.697778	0.0700266	9.96448	2.18006e-23	1.96412e-21
ENSG00000146094	719.822	0.758124	0.0764513	9.91644	3.53144e-23	3.1709e-21
ENSG00000049246	852.683	-0.883775	0.0892003	-9.90776	3.85167e-23	3.4468e-21
ENSG00000233237	211.11	1.18533	0.119672	9.90481	3.96718e-23	3.53824e-21
ENSG00000254872	252.529	2.02317	0.204322	9.90188	4.08524e-23	3.63135e-21
ENSG00000273032	516.559	1.3273	0.13431	9.88234	4.96572e-23	4.3993e-21
ENSG00000214562	89.3366	-1.81592	0.18412	-9.86272	6.03924e-23	5.33259e-21
ENSG00000198932	179.285	1.22622	0.124368	9.85962	6.22876e-23	5.48172e-21
ENSG00000047188	1974.69	-0.825352	0.0837481	-9.85517	6.51043e-23	5.7107e-21
ENSG00000123219	1017.85	-0.904755	0.0919217	-9.84268	7.37213e-23	6.44528e-21
ENSG00000132669	172.192	-1.16976	0.11935	-9.80106	1.11409e-22	9.70833e-21
ENSG00000218416	788.264	0.798877	0.0815611	9.79483	1.18502e-22	1.02926e-20
ENSG00000147044	1392.74	-0.636645	0.0650568	-9.78598	1.29341e-22	1.11975e-20
ENSG00000160007	11340.4	-0.447959	0.0458315	-9.77402	1.45553e-22	1.25601e-20
ENSG00000154217	424.483	-1.3674	0.140137	-9.75755	1.71245e-22	1.47293e-20
ENSG00000263235	194.268	1.33273	0.137104	9.72059	2.46361e-22	2.11219e-20
ENSG00000116580	4171.25	-0.405915	0.0417737	-9.71699	2.55211e-22	2.17404e-20
ENSG00000049167	486.054	-0.811162	0.0834764	-9.71726	2.54533e-22	2.17404e-20
ENSG00000261505	462.037	1.22581	0.126287	9.70656	2.82727e-22	2.40074e-20
ENSG00000228507	51.7181	4.59165	0.473084	9.70579	2.84863e-22	2.41118e-20
ENSG00000215478	96.6826	2.32711	0.240178	9.68911	3.35452e-22	2.83036e-20
ENSG00000073711	1000.04	-0.652462	0.0674036	-9.67993	3.66975e-22	3.08654e-20
ENSG00000149179	1648.31	-0.594161	0.0614063	-9.6759	3.81717e-22	3.19791e-20
ENSG00000257122	402.967	0.781445	0.080764	9.67566	3.82623e-22	3.19791e-20
ENSG00000173726	9753.89	-0.451935	0.0467465	-9.6678	4.13177e-22	3.44245e-20
ENSG00000273328	88.0461	-1.55511	0.161091	-9.65362	4.74494e-22	3.94097e-20
ENSG00000052841	8170.75	-0.840671	0.0872124	-9.63935	5.45328e-22	4.51518e-20
ENSG00000164070	1326.51	-0.510454	0.052959	-9.63866	5.48999e-22	4.53146e-20
ENSG00000069011	1627.16	0.541346	0.056259	9.6224	6.4313e-22	5.29199e-20
ENSG00000250451	200.148	1.09539	0.113947	9.61321	7.03249e-22	5.76882e-20
ENSG00000141519	580.741	-0.748724	0.0779048	-9.61076	7.20173e-22	5.88947e-20
ENSG00000232098	1274.01	0.541555	0.056374	9.60647	7.50821e-22	6.12126e-20
ENSG00000173614	221.911	-1.06777	0.111414	-9.58382	9.35181e-22	7.60099e-20
ENSG00000249852	178.737	1.35606	0.141551	9.57998	9.7065e-22	7.86522e-20
ENSG00000240338	44.1382	3.96234	0.413882	9.57358	1.0327e-21	8.34256e-20
ENSG00000133135	115.487	-1.46544	0.153086	-9.57267	1.04179e-21	8.39053e-20
ENSG00000178297	203.861	1.40539	0.147012	9.5597	1.18096e-21	9.48266e-20
ENSG00000172965	239.92	-0.953255	0.099867	-9.54525	1.35778e-21	1.08624e-19
ENSG00000130751	247.379	0.987638	0.103472	9.54501	1.36097e-21	1.08624e-19
ENSG00000185630	17325.7	-0.363345	0.0380719	-9.54367	1.37864e-21	1.09705e-19
ENSG00000259129	133.897	-1.70612	0.179036	-9.5295	1.58049e-21	1.25392e-19
ENSG00000185753	962.154	-0.552141	0.0579692	-9.52473	1.65474e-21	1.30892e-19
ENSG00000269069	35.0784	-3.29498	0.345954	-9.52435	1.66075e-21	1.30977e-19
ENSG00000106804	365.782	-0.877856	0.092275	-9.51348	1.84388e-21	1.4499e-19
ENSG00000257337	2365.97	0.491026	0.0516454	9.50764	1.95032e-21	1.52907e-19
ENSG00000111785	2090.78	0.489877	0.0517256	9.47068	2.78015e-21	2.17326e-19
ENSG00000112137	983.415	-0.56307	0.0594627	-9.4693	2.81737e-21	2.19589e-19
ENSG00000213888	197.872	1.01738	0.107726	9.44415	3.58285e-21	2.78435e-19
ENSG00000274370	70.7513	2.69323	0.285428	9.43578	3.88095e-21	3.00723e-19
ENSG00000129103	9211.52	-0.368221	0.0390883	-9.42025	4.50034e-21	3.47703e-19
ENSG00000204366	464.307	0.848632	0.0902012	9.40821	5.04675e-21	3.87912e-19
ENSG00000051523	91.967	1.71966	0.182784	9.40814	5.04995e-21	3.87912e-19
ENSG00000131634	64.9136	2.55532	0.272003	9.39446	5.75134e-21	4.40516e-19
ENSG00000283390	62.6685	5.7696	0.614653	9.38675	6.18784e-21	4.72587e-19
ENSG00000116171	3481.54	-0.505374	0.0539071	-9.37489	6.92476e-21	5.27353e-19
ENSG00000063438	664.192	1.24098	0.132608	9.35826	8.10599e-21	6.15546e-19
ENSG00000279712	35.8273	-3.3755	0.360835	-9.35469	8.38474e-21	6.34899e-19
ENSG00000257621	2762.2	-0.547113	0.0585387	-9.34617	9.08828e-21	6.86217e-19
ENSG00000180626	1256.9	0.648228	0.0694299	9.33644	9.96272e-21	7.50111e-19
ENSG00000067715	701.846	-0.958116	0.102637	-9.33497	1.01022e-20	7.58463e-19
ENSG00000102317	5119.3	-0.460936	0.0493849	-9.33355	1.02386e-20	7.66543e-19
ENSG00000186642	30.4335	3.88007	0.415981	9.32751	1.08384e-20	8.09165e-19
ENSG00000235513	86.6546	1.52445	0.16358	9.31929	1.17125e-20	8.71976e-19
ENSG00000148488	317.59	-0.901205	0.0967284	-9.31686	1.19835e-20	8.8966e-19
ENSG00000138185	145.128	-1.42006	0.152552	-9.3087	1.29402e-20	9.58005e-19
ENSG00000075945	1175.28	-0.814857	0.087612	-9.30075	1.39457e-20	1.02958e-18
ENSG00000140950	1192.43	-0.619584	0.066625	-9.29957	1.4101e-20	1.03816e-18
ENSG00000213997	119.617	1.73044	0.18623	9.29192	1.51525e-20	1.11249e-18
ENSG00000197385	307.663	0.893383	0.0961576	9.29082	1.53109e-20	1.12103e-18
ENSG00000267336	33.1546	4.87778	0.52532	9.28535	1.61179e-20	1.17687e-18
ENSG00000015171	5479.02	-0.497077	0.0536507	-9.26506	1.94959e-20	1.41962e-18
ENSG00000127980	1009.57	-0.640449	0.0691677	-9.25938	2.05629e-20	1.49323e-18
ENSG00000254122	191.133	1.299	0.140339	9.25611	2.12024e-20	1.53547e-18
ENSG00000249661	28.9879	3.79929	0.410571	9.25367	2.16923e-20	1.56668e-18
ENSG00000011258	1401.52	-0.583562	0.0630718	-9.25234	2.19624e-20	1.58189e-18
ENSG00000102763	677.897	-0.64016	0.0692285	-9.24706	2.30761e-20	1.65761e-18
ENSG00000162728	29.4762	3.64613	0.394525	9.24181	2.42357e-20	1.73622e-18
ENSG00000228672	2176.27	1.52394	0.165036	9.23399	2.60731e-20	1.86283e-18
ENSG00000124942	120520	-0.386075	0.0418789	-9.21884	3.00325e-20	2.13996e-18
ENSG00000115267	900.212	-0.721391	0.0783024	-9.21288	3.17498e-20	2.25627e-18
ENSG00000135407	484.817	0.979047	0.106415	9.20026	3.57094e-20	2.53089e-18
ENSG00000165917	66.6404	2.36719	0.258476	9.15825	5.27469e-20	3.72847e-18
ENSG00000151338	328.428	-0.782843	0.0855997	-9.1454	5.94114e-20	4.18842e-18
ENSG00000140718	1836.17	-0.527001	0.0576321	-9.14422	6.00632e-20	4.22317e-18
ENSG00000172878	617.019	-0.602858	0.0659643	-9.13915	6.29451e-20	4.41413e-18
ENSG00000166734	3055.82	-0.983189	0.107622	-9.13554	6.50819e-20	4.55196e-18
ENSG00000215440	743.815	-0.754945	0.0828621	-9.11086	8.17299e-20	5.70136e-18
ENSG00000160679	3807.74	-0.338317	0.0371497	-9.10685	8.48099e-20	5.90072e-18
ENSG00000260910	45.9062	2.27065	0.249354	9.10616	8.53469e-20	5.92259e-18
ENSG00000253741	65.2719	2.00262	0.220229	9.09334	9.60435e-20	6.64751e-18
ENSG00000260193	75.9007	2.50287	0.275262	9.09268	9.66299e-20	6.67073e-18
ENSG00000186868	985.659	-0.517073	0.0569396	-9.08107	1.0751e-19	7.40259e-18
ENSG00000255622	502.11	-0.6394	0.0705529	-9.06271	1.27249e-19	8.73911e-18
ENSG00000242294	439.274	-0.796014	0.0878484	-9.06123	1.28991e-19	8.83587e-18
ENSG00000188505	89.3844	1.879	0.207876	9.03905	1.58032e-19	1.07974e-17
ENSG00000257354	401.815	-0.71522	0.0792047	-9.03002	1.71648e-19	1.16976e-17
ENSG00000166263	642.455	-0.590387	0.0654013	-9.02715	1.762e-19	1.19771e-17
ENSG00000234420	1811.7	-0.800303	0.088845	-9.00786	2.10125e-19	1.42467e-17
ENSG00000146476	2693.34	-0.584414	0.0649912	-8.9922	2.42329e-19	1.63884e-17
ENSG00000231691	30.3913	3.69433	0.411361	8.98077	2.68886e-19	1.81382e-17
ENSG00000197757	892.395	0.7262	0.0809657	8.96924	2.98572e-19	2.00898e-17
ENSG00000103995	1385.09	0.547413	0.061116	8.95694	3.33816e-19	2.24044e-17
ENSG00000165626	294.648	-1.16561	0.130164	-8.95495	3.39895e-19	2.2755e-17
ENSG00000258289	2797.04	-0.545116	0.0609403	-8.94509	3.71642e-19	2.48179e-17
ENSG00000138698	775.589	-0.766837	0.0858358	-8.93376	4.1176e-19	2.7428e-17
ENSG00000070047	1876.7	-0.745459	0.0834562	-8.93234	4.17092e-19	2.77137e-17
ENSG00000169251	2618.68	-0.379207	0.0424575	-8.93145	4.20474e-19	2.78687e-17
ENSG00000259407	157.652	1.17049	0.131094	8.92868	4.3113e-19	2.85039e-17
ENSG00000186205	375.17	0.712652	0.0798237	8.92783	4.3446e-19	2.86528e-17
ENSG00000177688	34.5092	2.81532	0.315753	8.91621	4.8251e-19	3.17429e-17
ENSG00000165061	147.116	-1.2024	0.134919	-8.91195	5.01431e-19	3.29063e-17
ENSG00000064199	264.698	-1.25452	0.14083	-8.90809	5.19205e-19	3.39252e-17
ENSG00000213145	398.476	1.77279	0.199011	8.90802	5.19511e-19	3.39252e-17
ENSG00000178623	144.944	1.79481	0.201614	8.90221	5.47478e-19	3.56639e-17
ENSG00000101871	2012.67	-0.479629	0.0540045	-8.88128	6.60971e-19	4.29518e-17
ENSG00000213073	287.882	1.54023	0.173772	8.8635	7.75407e-19	5.02653e-17
ENSG00000149403	292.069	0.892367	0.100794	8.85342	8.48796e-19	5.48888e-17
ENSG00000108474	229.041	-0.921914	0.104146	-8.85212	8.58756e-19	5.53981e-17
ENSG00000064763	96.666	-1.63402	0.1846	-8.85166	8.62253e-19	5.5489e-17
ENSG00000134571	34.9903	5.29691	0.598431	8.85133	8.64816e-19	5.55195e-17
ENSG00000232434	1310.24	0.87387	0.0988056	8.84433	9.20758e-19	5.89684e-17
ENSG00000273036	62.015	-1.81519	0.205351	-8.83945	9.61951e-19	6.14585e-17
ENSG00000151532	824.957	-0.674954	0.0763652	-8.8385	9.701e-19	6.18305e-17
ENSG00000267366	30.8472	2.95829	0.335227	8.82475	1.09703e-18	6.97534e-17
ENSG00000175938	516.129	0.642507	0.0728636	8.81794	1.16584e-18	7.39517e-17
ENSG00000127481	11661.6	-0.701262	0.079812	-8.78643	1.54392e-18	9.7701e-17
ENSG00000168539	51.8531	1.90589	0.216957	8.78463	1.5688e-18	9.90397e-17
ENSG00000004766	1072.14	-0.493521	0.0562114	-8.77972	1.63875e-18	1.0321e-16
ENSG00000197937	872.035	-0.581906	0.0663365	-8.77204	1.75466e-18	1.10249e-16
ENSG00000149292	890.722	-0.538014	0.0613454	-8.77025	1.78278e-18	1.11752e-16
ENSG00000140623	29.9422	3.27977	0.374468	8.75848	1.97901e-18	1.2376e-16
ENSG00000160226	877.856	1.20138	0.137289	8.75074	2.11959e-18	1.3224e-16
ENSG00000173269	591.906	0.631565	0.0722265	8.74423	2.24538e-18	1.39761e-16
ENSG00000129194	124.707	1.39079	0.159218	8.73514	2.43365e-18	1.51125e-16
ENSG00000205133	925.405	-0.764745	0.08762	-8.72797	2.59294e-18	1.60642e-16
ENSG00000260572	91.8017	1.40883	0.161546	8.72089	2.76021e-18	1.70607e-16
ENSG00000100918	219.761	1.44193	0.165401	8.71779	2.83678e-18	1.74933e-16
ENSG00000280128	594.209	-1.15012	0.132046	-8.70996	3.03982e-18	1.87019e-16
ENSG00000113389	1136.84	-0.470838	0.0541794	-8.69035	3.61323e-18	2.21784e-16
ENSG00000102595	1168.92	-0.510117	0.0587131	-8.6883	3.67906e-18	2.25304e-16
ENSG00000057593	124.553	1.17581	0.135399	8.68405	3.81922e-18	2.3335e-16
ENSG00000263618	128.628	-1.40077	0.161812	-8.65673	4.85502e-18	2.95956e-16
ENSG00000237438	1352.26	-0.54138	0.0625606	-8.65369	4.98601e-18	3.03245e-16
ENSG00000102904	421.956	1.42875	0.165174	8.65001	5.14936e-18	3.12465e-16
ENSG00000275764	137.279	-1.30811	0.151471	-8.63603	5.82003e-18	3.52357e-16
ENSG00000182885	53.8317	2.32134	0.268883	8.63327	5.96246e-18	3.6016e-16
ENSG00000262655	81.4237	1.60969	0.186543	8.62909	6.18412e-18	3.72702e-16
ENSG00000228314	175.975	-1.24695	0.1446	-8.62345	6.49675e-18	3.90657e-16
ENSG00000179038	39.8675	3.26134	0.378371	8.61942	6.72949e-18	4.03739e-16
ENSG00000108443	1817.77	-0.62132	0.0722231	-8.60279	7.78039e-18	4.6469e-16
ENSG00000268355	41.3255	2.23597	0.259907	8.60297	7.76787e-18	4.6469e-16
ENSG00000273284	73.2858	1.95412	0.227191	8.6012	7.88902e-18	4.70122e-16
ENSG00000237807	333.558	0.879474	0.102298	8.59716	8.17158e-18	4.85871e-16
ENSG00000225356	35.0358	4.65506	0.542712	8.5774	9.70402e-18	5.757e-16
ENSG00000148484	853.283	-0.985332	0.114964	-8.57082	1.02748e-17	6.08201e-16
ENSG00000268655	118.439	1.21206	0.141862	8.54394	1.29718e-17	7.66144e-16
ENSG00000099769	85.5662	2.33829	0.273719	8.54267	1.3116e-17	7.72945e-16
ENSG00000063127	146.385	1.28066	0.149967	8.53966	1.34622e-17	7.9159e-16
ENSG00000151651	610.727	1.46903	0.172112	8.53527	1.3983e-17	8.20397e-16
ENSG00000182600	125.219	1.24612	0.1462	8.52338	1.54963e-17	9.07182e-16
ENSG00000007168	4784.1	-0.314275	0.0369241	-8.51138	1.71879e-17	1.004e-15
ENSG00000185863	89.6363	1.67098	0.196812	8.4902	2.0628e-17	1.2023e-15
ENSG00000145040	55.7044	2.34791	0.276784	8.48284	2.1977e-17	1.27813e-15
ENSG00000280734	588.028	0.650287	0.0766795	8.48059	2.2406e-17	1.30023e-15
ENSG00000198576	56.3343	1.78804	0.21096	8.47574	2.33593e-17	1.3526e-15
ENSG00000279253	380.014	0.723875	0.085432	8.47311	2.38924e-17	1.38046e-15
ENSG00000169826	1389.01	-0.518271	0.0612137	-8.46658	2.527e-17	1.45689e-15
ENSG00000250656	33.4129	2.6585	0.31433	8.45769	2.72722e-17	1.56892e-15
ENSG00000204843	3121.42	0.532469	0.0630195	8.44927	2.93125e-17	1.68265e-15
ENSG00000143303	2833.65	0.515999	0.0610798	8.44795	2.96469e-17	1.69818e-15
ENSG00000131374	3628.77	-0.699718	0.0829169	-8.43879	3.20643e-17	1.82877e-15
ENSG00000258028	45.1663	-1.96852	0.233268	-8.4389	3.20335e-17	1.82877e-15
ENSG00000204305	663.287	0.53758	0.0637058	8.43847	3.21508e-17	1.82978e-15
ENSG00000139540	57.9251	1.84499	0.218953	8.42642	3.56415e-17	2.0241e-15
ENSG00000151835	505.629	-0.675626	0.0802526	-8.41874	3.80542e-17	2.15651e-15
ENSG00000181444	1542.95	0.467412	0.0555385	8.41599	3.89595e-17	2.20312e-15
ENSG00000278041	223.961	1.12574	0.133835	8.4114	4.05142e-17	2.28617e-15
ENSG00000257497	28.1671	-3.0542	0.363208	-8.40896	4.1365e-17	2.32924e-15
ENSG00000271119	106.492	1.34616	0.160197	8.40314	4.34709e-17	2.44264e-15
ENSG00000185305	706.793	-0.798606	0.0950987	-8.39765	4.55487e-17	2.554e-15
ENSG00000139613	8253.1	-0.400982	0.0477563	-8.39641	4.60334e-17	2.57574e-15
ENSG00000198919	1621.99	-0.419012	0.0499888	-8.38211	5.19893e-17	2.90288e-15
ENSG00000183242	146.802	1.1544	0.137761	8.37977	5.30298e-17	2.95477e-15
ENSG00000255973	47.3516	9.02948	1.07785	8.3773	5.41556e-17	3.01119e-15
ENSG00000129673	81.8524	1.42803	0.170677	8.36687	5.91695e-17	3.2831e-15
ENSG00000133318	17923.3	-0.465096	0.0556176	-8.36238	6.14639e-17	3.40331e-15
ENSG00000133114	870.834	-0.627993	0.0751124	-8.36071	6.23428e-17	3.4448e-15
ENSG00000185745	1103.33	0.879924	0.105345	8.35276	6.6684e-17	3.67703e-15
ENSG00000228878	140.293	-1.07341	0.128675	-8.342	7.30458e-17	4.01948e-15
ENSG00000144036	1079.02	-0.474079	0.0568386	-8.3408	7.37914e-17	4.05212e-15
ENSG00000198015	1855.99	-0.516666	0.061986	-8.33521	7.7364e-17	4.23955e-15
ENSG00000163354	690.436	0.965758	0.115878	8.33425	7.79879e-17	4.26494e-15
ENSG00000116539	7254.03	-0.385764	0.0463291	-8.3266	8.31993e-17	4.5406e-15
ENSG00000234776	55.3081	2.08534	0.250961	8.3094	9.61854e-17	5.23856e-15
ENSG00000213463	3195.97	-0.453694	0.0546812	-8.29708	1.06703e-16	5.79947e-15
ENSG00000182544	2320.55	0.438992	0.0529665	8.28811	1.15062e-16	6.24106e-15
ENSG00000125531	40.0331	2.72146	0.32883	8.27618	1.27193e-16	6.885e-15
ENSG00000273329	250.378	0.848771	0.10258	8.27422	1.29302e-16	6.98496e-15
ENSG00000167766	4404.63	-0.692139	0.0837067	-8.26862	1.3552e-16	7.30601e-15
ENSG00000152503	521.365	0.583335	0.0705831	8.26451	1.40267e-16	7.54661e-15
ENSG00000218418	40.0486	2.29289	0.277478	8.2633	1.41697e-16	7.60815e-15
ENSG00000231770	596.637	0.564819	0.0683761	8.26047	1.45095e-16	7.77488e-15
ENSG00000230629	157.493	1.9669	0.238124	8.25999	1.45681e-16	7.77495e-15
ENSG00000165185	509.917	-0.778649	0.0942651	-8.26021	1.45419e-16	7.77495e-15
ENSG00000165105	2785.3	-0.391523	0.0474261	-8.25544	1.51349e-16	8.06123e-15
ENSG00000143776	12631.3	-0.345463	0.0418572	-8.25338	1.5398e-16	8.18494e-15
ENSG00000136944	781.431	0.659753	0.0799973	8.2472	1.62151e-16	8.60208e-15
ENSG00000185104	1563.14	-0.885852	0.107444	-8.24475	1.65501e-16	8.7623e-15
ENSG00000263327	291.956	1.06179	0.128861	8.23979	1.72518e-16	9.11565e-15
ENSG00000206195	555.729	-0.715003	0.0867924	-8.23808	1.75003e-16	9.22864e-15
ENSG00000069696	114.522	1.50576	0.18296	8.22996	1.87269e-16	9.8559e-15
ENSG00000164548	3850.8	0.6787	0.0825268	8.22399	1.96837e-16	1.0339e-14
ENSG00000101596	1867.59	-0.423108	0.0514896	-8.21735	2.08047e-16	1.09062e-14
ENSG00000172164	93.0023	-1.35975	0.16552	-8.21502	2.12132e-16	1.10767e-14
ENSG00000182742	167.117	0.932629	0.113526	8.21514	2.11909e-16	1.10767e-14
ENSG00000095209	945.499	-0.477747	0.0581976	-8.20904	2.22959e-16	1.16192e-14
ENSG00000260190	28.9966	2.75572	0.335878	8.20453	2.31496e-16	1.20405e-14
ENSG00000141449	263.615	-0.890575	0.108573	-8.20255	2.35345e-16	1.22168e-14
ENSG00000167524	1000.97	0.597615	0.0728875	8.19914	2.42111e-16	1.25435e-14
ENSG00000250995	72.0557	1.71512	0.209197	8.19858	2.43247e-16	1.25779e-14
ENSG00000136631	3409.08	-0.536819	0.0655357	-8.19124	2.58547e-16	1.3343e-14
ENSG00000177058	1041.22	-0.693428	0.0846768	-8.18911	2.63163e-16	1.35549e-14
ENSG00000163357	500.55	0.723147	0.0883236	8.18747	2.66766e-16	1.37139e-14
ENSG00000234072	847.745	0.738478	0.0902169	8.18558	2.70984e-16	1.39039e-14
ENSG00000158623	1493.09	-0.418822	0.0512283	-8.17559	2.94412e-16	1.50768e-14
ENSG00000242622	273.05	0.82123	0.100567	8.16601	3.1875e-16	1.62918e-14
ENSG00000115904	2018.89	-0.420177	0.0514758	-8.16261	3.27855e-16	1.6725e-14
ENSG00000260014	54.0427	8.49526	1.04093	8.16125	3.31581e-16	1.68827e-14
ENSG00000168300	1355.61	-0.826579	0.101294	-8.16021	3.34439e-16	1.69957e-14
ENSG00000135205	75.2776	-1.74992	0.214507	-8.1579	3.40902e-16	1.72581e-14
ENSG00000223518	37.6907	2.74688	0.33671	8.158	3.40627e-16	1.72581e-14
ENSG00000236409	77.6124	1.6544	0.202855	8.15558	3.47509e-16	1.75591e-14
ENSG00000137573	445.612	-0.798537	0.0979232	-8.15473	3.49972e-16	1.76291e-14
ENSG00000203993	1235.65	0.562006	0.0689185	8.15464	3.50221e-16	1.76291e-14
ENSG00000113763	136.348	1.18597	0.145453	8.15365	3.53112e-16	1.77411e-14
ENSG00000099812	1452.59	0.623439	0.0765497	8.14423	3.81698e-16	1.91411e-14
ENSG00000272630	35.4757	-2.49601	0.306812	-8.13533	4.10818e-16	2.05626e-14
ENSG00000138413	2078.83	-0.350956	0.0431713	-8.12939	4.31464e-16	2.15554e-14
ENSG00000168925	31.0126	5.65033	0.695678	8.12206	4.58352e-16	2.28557e-14
ENSG00000140015	64.8514	-1.59925	0.197	-8.11805	4.73732e-16	2.35784e-14
ENSG00000100890	264.397	-0.766531	0.0944505	-8.11569	4.83026e-16	2.3996e-14
ENSG00000146648	1510.77	-0.430471	0.0530805	-8.10978	5.07122e-16	2.51461e-14
ENSG00000231426	209.919	-0.991027	0.122268	-8.10535	5.25926e-16	2.60299e-14
ENSG00000261342	103.739	1.63998	0.20234	8.10508	5.27102e-16	2.60396e-14
ENSG00000120008	2326.43	-0.382152	0.0471868	-8.09871	5.55438e-16	2.73886e-14
ENSG00000185291	311.64	0.998543	0.123411	8.09119	5.90842e-16	2.90803e-14
ENSG00000172478	59.582	1.66305	0.205677	8.08572	6.17958e-16	3.03588e-14
ENSG00000111335	4647.92	0.895188	0.110718	8.08526	6.20306e-16	3.04179e-14
ENSG00000182324	244.123	1.73794	0.214993	8.08371	6.28274e-16	3.07519e-14
ENSG00000196372	894.075	-0.468519	0.0580032	-8.07746	6.61323e-16	3.231e-14
ENSG00000153291	861.173	-0.507371	0.0628379	-8.07428	6.78749e-16	3.31005e-14
ENSG00000114439	3800.57	-0.419501	0.0519621	-8.07322	6.84673e-16	3.33283e-14
ENSG00000184677	4020.24	-0.421557	0.052222	-8.07241	6.89234e-16	3.3489e-14
ENSG00000250584	448.851	0.624418	0.0773706	8.07048	7.0024e-16	3.39617e-14
ENSG00000214290	194.954	-0.918826	0.113886	-8.06796	7.14806e-16	3.46049e-14
ENSG00000149527	69.7216	1.95674	0.242759	8.06041	7.60367e-16	3.67437e-14
ENSG00000106536	486.356	-0.600959	0.0745682	-8.05919	7.68043e-16	3.70473e-14
ENSG00000204390	133.184	1.02662	0.127397	8.05844	7.72771e-16	3.72078e-14
ENSG00000234614	89.9641	1.23032	0.152788	8.05251	8.1114e-16	3.89846e-14
ENSG00000118160	123.597	1.29109	0.160458	8.0463	8.53372e-16	4.09403e-14
ENSG00000238178	318.659	-0.925625	0.115042	-8.04596	8.55717e-16	4.09788e-14
ENSG00000121988	249.231	-0.97993	0.121962	-8.0347	9.38067e-16	4.48416e-14
ENSG00000138036	682.13	-0.524635	0.0653072	-8.03334	9.48547e-16	4.52612e-14
ENSG00000270977	336.835	-0.717114	0.0892703	-8.03306	9.50686e-16	4.5282e-14
ENSG00000281655	83.1518	-1.64836	0.205254	-8.03082	9.68196e-16	4.60335e-14
ENSG00000149743	1272.59	-0.539126	0.0671353	-8.03044	9.71268e-16	4.60971e-14
ENSG00000103269	712.167	1.24514	0.155066	8.02974	9.76798e-16	4.62769e-14
ENSG00000073067	217.602	2.34731	0.292365	8.02868	9.8527e-16	4.65952e-14
ENSG00000143614	2779	-0.703113	0.0875784	-8.02838	9.87648e-16	4.66247e-14
ENSG00000137992	1275.04	-0.39134	0.048899	-8.00302	1.21402e-15	5.72095e-14
ENSG00000280062	32.6158	2.49901	0.312562	7.99524	1.29317e-15	6.08318e-14
ENSG00000104361	1151.36	-0.600897	0.0752546	-7.98485	1.4069e-15	6.60645e-14
ENSG00000006534	890.306	0.642408	0.0804629	7.98391	1.41773e-15	6.64557e-14
ENSG00000067064	6644.78	-0.504728	0.0632631	-7.97824	1.48438e-15	6.94577e-14
ENSG00000185838	225.332	1.67395	0.210104	7.96724	1.6226e-15	7.57916e-14
ENSG00000149679	1910.49	-0.371385	0.0466404	-7.96274	1.68264e-15	7.84583e-14
ENSG00000173442	3719.01	-0.401619	0.0504465	-7.9613	1.70245e-15	7.92429e-14
ENSG00000275322	239.077	0.949063	0.119242	7.95913	1.73249e-15	8.05001e-14
ENSG00000141510	2853.88	-0.502754	0.0631991	-7.95509	1.79006e-15	8.30302e-14
ENSG00000115641	2896.38	-0.364606	0.0458396	-7.95396	1.80644e-15	8.36436e-14
ENSG00000149418	24718.6	0.367938	0.046267	7.95248	1.82808e-15	8.44985e-14
ENSG00000136731	5155.25	-0.319023	0.0401296	-7.94983	1.86771e-15	8.61806e-14
ENSG00000227896	375.029	0.613488	0.0771999	7.94674	1.91478e-15	8.81994e-14
ENSG00000163412	850.076	-0.508408	0.0639856	-7.94567	1.93148e-15	8.88147e-14
ENSG00000267795	93.5569	1.41388	0.178522	7.91991	2.37679e-15	1.09103e-13
ENSG00000071794	7108.08	-0.328769	0.0416075	-7.90168	2.75163e-15	1.26091e-13
ENSG00000133103	1152.93	-0.468546	0.0593589	-7.89344	2.93958e-15	1.34472e-13
ENSG00000119801	1647.37	-0.370112	0.0468926	-7.89276	2.9557e-15	1.34977e-13
ENSG00000138653	88.8613	-1.22414	0.15519	-7.88801	3.0705e-15	1.39979e-13
ENSG00000075043	46.6527	2.06055	0.261254	7.88716	3.09153e-15	1.40696e-13
ENSG00000170835	199.348	1.30513	0.165666	7.87811	3.32363e-15	1.51001e-13
ENSG00000001629	2206.16	-0.339932	0.0431886	-7.87086	3.52217e-15	1.59748e-13
ENSG00000228638	176.209	-0.991237	0.125951	-7.87001	3.54608e-15	1.60558e-13
ENSG00000102181	857.453	-0.498988	0.0634408	-7.86541	3.67878e-15	1.66283e-13
ENSG00000213638	356.547	1.58389	0.20183	7.84764	4.23941e-15	1.91299e-13
ENSG00000166025	899.144	-0.470256	0.0599495	-7.8442	4.35731e-15	1.96286e-13
ENSG00000231482	112.299	1.15719	0.147559	7.84222	4.42662e-15	1.9907e-13
ENSG00000122483	340.617	-0.792245	0.101061	-7.83931	4.53011e-15	2.03381e-13
ENSG00000102870	1657.85	-0.506921	0.0648079	-7.82191	5.20293e-15	2.33193e-13
ENSG00000144468	1052.52	-0.456786	0.0584036	-7.8212	5.23228e-15	2.34114e-13
ENSG00000182307	3613.09	-0.327421	0.041882	-7.81771	5.37944e-15	2.3989e-13
ENSG00000137834	532.927	1.03344	0.132189	7.81789	5.37172e-15	2.3989e-13
ENSG00000189229	128.388	-1.06757	0.136563	-7.81737	5.3937e-15	2.40124e-13
ENSG00000116005	4636.33	-0.290834	0.037207	-7.81664	5.42537e-15	2.4113e-13
ENSG00000181323	25.9974	3.84926	0.492653	7.81333	5.56959e-15	2.47126e-13
ENSG00000214300	463.017	0.914992	0.117116	7.81271	5.59694e-15	2.47734e-13
ENSG00000149532	10552.5	-0.30569	0.0391277	-7.8126	5.60192e-15	2.47734e-13
ENSG00000259768	657.441	-0.67673	0.0866542	-7.80954	5.73972e-15	2.53406e-13
ENSG00000077150	3462.45	-0.429946	0.0550639	-7.80812	5.80453e-15	2.55842e-13
ENSG00000156973	500.017	-0.807559	0.103429	-7.80783	5.81822e-15	2.56021e-13
ENSG00000279699	103.254	1.78106	0.228154	7.80639	5.88495e-15	2.58529e-13
ENSG00000274307	68.1677	1.52023	0.194787	7.80459	5.96966e-15	2.61818e-13
ENSG00000153558	542.112	-0.671294	0.0861226	-7.79464	6.45947e-15	2.82368e-13
ENSG00000163864	229.909	-0.835107	0.107139	-7.79465	6.45877e-15	2.82368e-13
ENSG00000196407	75.6202	1.51223	0.194025	7.79397	6.49351e-15	2.8339e-13
ENSG00000198270	1485.98	0.416859	0.053512	7.79001	6.70038e-15	2.91939e-13
ENSG00000115325	161.232	0.981767	0.126044	7.78907	6.75066e-15	2.93648e-13
ENSG00000216906	43.6397	2.14177	0.27501	7.78799	6.80855e-15	2.95682e-13
ENSG00000066044	2912.99	-0.55654	0.0714944	-7.78438	7.00561e-15	3.03744e-13
ENSG00000196922	2079.69	-0.400337	0.0514358	-7.78324	7.06887e-15	3.05988e-13
ENSG00000151422	1080.69	-0.455894	0.0586331	-7.77536	7.52313e-15	3.25122e-13
ENSG00000166801	13227.3	-0.387517	0.0498427	-7.7748	7.55679e-15	3.26046e-13
ENSG00000177721	91.3409	1.79565	0.231108	7.76977	7.86293e-15	3.38705e-13
ENSG00000258676	624.128	1.09201	0.140552	7.76941	7.88499e-15	3.39106e-13
ENSG00000064270	639.134	0.510002	0.0656521	7.76825	7.95787e-15	3.41687e-13
ENSG00000269982	82.49	-1.35855	0.175037	-7.7615	8.39338e-15	3.59805e-13
ENSG00000158683	639.089	0.889086	0.114593	7.75866	8.58325e-15	3.67352e-13
ENSG00000153956	647.892	-0.759363	0.0978791	-7.75817	8.61629e-15	3.68173e-13
ENSG00000243504	40.869	8.10172	1.04471	7.75501	8.83382e-15	3.76862e-13
ENSG00000035499	767.846	-0.524456	0.0676319	-7.75457	8.86463e-15	3.77571e-13
ENSG00000049283	4022.19	0.389293	0.0502032	7.75435	8.87983e-15	3.77613e-13
ENSG00000232940	119.235	1.01278	0.130615	7.75391	8.91069e-15	3.7832e-13
ENSG00000280269	24.0857	3.24579	0.41869	7.75225	9.02771e-15	3.82677e-13
ENSG00000102057	1180.84	0.785491	0.101414	7.7454	9.52841e-15	4.03258e-13
ENSG00000157388	2233.25	-0.454955	0.0587674	-7.74162	9.81577e-15	4.14759e-13
ENSG00000083828	540.998	-0.767317	0.0991267	-7.74077	9.88157e-15	4.16877e-13
ENSG00000187554	181.39	-0.848927	0.10972	-7.73723	1.01606e-14	4.27967e-13
ENSG00000277559	139.221	0.998459	0.129104	7.73378	1.04403e-14	4.39054e-13
ENSG00000183888	89.8147	1.48667	0.19227	7.73216	1.05736e-14	4.43256e-13
ENSG00000235316	310.775	1.06181	0.137324	7.73218	1.05719e-14	4.43256e-13
ENSG00000137601	583.111	-0.67596	0.0874347	-7.73102	1.06689e-14	4.4655e-13
ENSG00000112473	15970.4	0.222741	0.0288196	7.72878	1.08583e-14	4.53762e-13
ENSG00000113494	77103.8	-0.69352	0.0897663	-7.72583	1.11123e-14	4.63647e-13
ENSG00000260337	940.672	0.863402	0.111763	7.72526	1.11623e-14	4.65002e-13
ENSG00000118007	2390.86	-0.453275	0.0587035	-7.72144	1.15026e-14	4.78429e-13
ENSG00000235374	94.527	1.21968	0.158031	7.718	1.18173e-14	4.90749e-13
ENSG00000108785	335.57	1.03149	0.133675	7.71644	1.19622e-14	4.95993e-13
ENSG00000227218	279.037	0.679014	0.0880344	7.71306	1.22838e-14	5.08022e-13
ENSG00000109016	413.351	-0.809401	0.10494	-7.71299	1.22906e-14	5.08022e-13
ENSG00000168781	2255.05	-0.324033	0.0420522	-7.70551	1.30318e-14	5.37826e-13
ENSG00000280422	31.8447	3.30541	0.429141	7.70238	1.33553e-14	5.50321e-13
ENSG00000204099	69.0513	1.66923	0.216833	7.69823	1.37969e-14	5.67638e-13
ENSG00000008256	571.345	-0.518043	0.0673379	-7.69319	1.43514e-14	5.89538e-13
ENSG00000148942	65.607	-1.62942	0.211921	-7.68881	1.48504e-14	6.09097e-13
ENSG00000093010	3334.83	0.291141	0.0379015	7.6815	1.57232e-14	6.439e-13
ENSG00000259972	333.221	-1.03419	0.134713	-7.67697	1.629e-14	6.66087e-13
ENSG00000137944	915.285	-0.461112	0.0600841	-7.67444	1.66146e-14	6.78315e-13
ENSG00000203392	191.285	0.852768	0.111135	7.67324	1.67711e-14	6.83654e-13
ENSG00000184956	241.851	1.97855	0.258072	7.66669	1.76491e-14	7.18342e-13
ENSG00000272316	41.4727	-1.84739	0.241013	-7.66511	1.78672e-14	7.26108e-13
ENSG00000164953	950.846	-0.561736	0.0733354	-7.65983	1.86186e-14	7.55487e-13
ENSG00000058668	3050.08	-0.626398	0.0817889	-7.65872	1.87796e-14	7.59702e-13
ENSG00000182685	488.368	1.13831	0.148628	7.65878	1.87705e-14	7.59702e-13
ENSG00000144061	319.413	-0.871183	0.113787	-7.65624	1.91454e-14	7.73325e-13
ENSG00000225762	72.4218	-1.50377	0.196419	-7.65591	1.91949e-14	7.74145e-13
ENSG00000067992	631.775	0.619098	0.0809243	7.65034	2.00453e-14	8.07117e-13
ENSG00000148634	1949.41	-0.327241	0.0427757	-7.65016	2.00732e-14	8.07117e-13
ENSG00000213445	802.182	0.665514	0.0870643	7.64394	2.10677e-14	8.45826e-13
ENSG00000141425	1822.47	-0.427358	0.0559358	-7.64016	2.16948e-14	8.69691e-13
ENSG00000109686	565.523	-0.622128	0.081834	-7.60232	2.90871e-14	1.16427e-12
ENSG00000165996	615.754	0.635227	0.083653	7.5936	3.11145e-14	1.24355e-12
ENSG00000269858	1095.82	-0.790239	0.104095	-7.5915	3.16211e-14	1.2619e-12
ENSG00000188818	3710.17	0.712013	0.0938065	7.59023	3.19327e-14	1.27242e-12
ENSG00000145362	50.8478	-1.67854	0.221278	-7.58567	3.30785e-14	1.31611e-12
ENSG00000179698	226.492	1.37241	0.180998	7.58246	3.39076e-14	1.34708e-12
ENSG00000228335	33.2982	2.54246	0.335419	7.57995	3.45692e-14	1.37131e-12
ENSG00000103154	44.3115	1.8873	0.249132	7.57549	3.57769e-14	1.41711e-12
ENSG00000184384	511.735	-0.718942	0.0949683	-7.57033	3.72274e-14	1.47237e-12
ENSG00000111615	1507.32	-0.59431	0.0785313	-7.5678	3.79584e-14	1.49905e-12
ENSG00000159658	5538.04	-0.293583	0.0387964	-7.56728	3.81113e-14	1.50285e-12
ENSG00000107404	1903.36	-0.540237	0.0715635	-7.54905	4.38434e-14	1.72632e-12
ENSG00000112964	6004.79	-0.362288	0.0480513	-7.53962	4.71333e-14	1.85312e-12
ENSG00000184178	408.008	-0.740829	0.0982805	-7.5379	4.77606e-14	1.87501e-12
ENSG00000130584	816.924	0.945864	0.125523	7.53539	4.86895e-14	1.90866e-12
ENSG00000103494	615.035	-0.687249	0.091342	-7.5239	5.31646e-14	2.08101e-12
ENSG00000196793	1397.13	0.576706	0.0766808	7.52086	5.44159e-14	2.12686e-12
ENSG00000116209	8815.58	-0.264393	0.035158	-7.52012	5.47254e-14	2.13582e-12
ENSG00000070886	146.222	1.59252	0.211964	7.51314	5.77247e-14	2.24957e-12
ENSG00000260822	595.708	-0.926144	0.123374	-7.50679	6.05951e-14	2.35797e-12
ENSG00000173226	527.484	-0.52591	0.0700633	-7.50621	6.08625e-14	2.36492e-12
ENSG00000078124	1402.09	-0.491144	0.0654397	-7.50529	6.12916e-14	2.37812e-12
ENSG00000215251	1107.07	0.682746	0.0911002	7.49446	6.65737e-14	2.57929e-12
ENSG00000215190	610.965	0.462494	0.061724	7.49293	6.73528e-14	2.60568e-12
ENSG00000226824	115.016	1.03936	0.138725	7.49226	6.76962e-14	2.61516e-12
ENSG00000022976	886.416	0.421669	0.0562986	7.48988	6.89368e-14	2.65922e-12
ENSG00000196967	659.559	0.773075	0.103228	7.48898	6.94112e-14	2.67364e-12
ENSG00000168461	248.214	-0.748252	0.0999361	-7.4873	7.03043e-14	2.70412e-12
ENSG00000100276	332.89	0.736658	0.0983988	7.48646	7.07583e-14	2.71765e-12
ENSG00000273724	29.2332	2.29582	0.306859	7.48166	7.33881e-14	2.81459e-12
ENSG00000138071	9594.9	-0.473885	0.0633825	-7.47659	7.6273e-14	2.92058e-12
ENSG00000114279	145.634	-1.46808	0.196362	-7.47643	7.63716e-14	2.92058e-12
ENSG00000113211	204.018	-0.774448	0.103594	-7.47579	7.67419e-14	2.93052e-12
ENSG00000197405	80.3123	1.7467	0.233815	7.47043	7.99335e-14	3.04802e-12
ENSG00000273002	311.047	0.677698	0.0907223	7.47002	8.01799e-14	3.05304e-12
ENSG00000005810	2796.99	-0.426386	0.0570834	-7.46952	8.0487e-14	3.06035e-12
ENSG00000271880	43.4298	1.694	0.226799	7.46918	8.06986e-14	3.06401e-12
ENSG00000213366	2374.46	-0.324874	0.0435056	-7.46742	8.17831e-14	3.10076e-12
ENSG00000164082	158.618	1.24258	0.166555	7.46048	8.62091e-14	3.26391e-12
ENSG00000143458	1249.55	-0.52235	0.0700226	-7.45973	8.6697e-14	3.27771e-12
ENSG00000134318	1857.11	-0.350492	0.0470031	-7.45679	8.86575e-14	3.34707e-12
ENSG00000126895	44.4851	1.83401	0.246043	7.45403	9.05321e-14	3.413e-12
ENSG00000147576	614.567	-0.556792	0.0746986	-7.45384	9.0662e-14	3.41305e-12
ENSG00000040341	1766.77	-0.448809	0.060299	-7.44306	9.8383e-14	3.69848e-12
ENSG00000102699	1047.78	-0.537816	0.0722722	-7.44154	9.95187e-14	3.73589e-12
ENSG00000272341	388.41	-0.710391	0.0955746	-7.43285	1.06283e-13	3.98025e-12
ENSG00000102174	499.093	-0.83469	0.112298	-7.43279	1.06328e-13	3.98025e-12
ENSG00000105289	3264.66	0.333126	0.044857	7.4264	1.11594e-13	4.17151e-12
ENSG00000116678	408.626	-0.880594	0.118588	-7.42564	1.12237e-13	4.18966e-12
ENSG00000066279	7483.6	-0.450421	0.0607082	-7.41944	1.17615e-13	4.38425e-12
ENSG00000164077	540.262	0.482065	0.0649819	7.41845	1.18499e-13	4.411e-12
ENSG00000196914	16897.4	-0.263817	0.0355765	-7.41549	1.21177e-13	4.50438e-12
ENSG00000073417	1094.3	-0.423501	0.0572031	-7.40347	1.32673e-13	4.92484e-12
ENSG00000267605	131.064	1.06383	0.143705	7.40291	1.33228e-13	4.93856e-12
ENSG00000172215	54.388	1.6656	0.225039	7.4014	1.34759e-13	4.98833e-12
ENSG00000184678	1157.64	0.570525	0.07715	7.39502	1.41391e-13	5.22654e-12
ENSG00000076685	1048.94	-0.408198	0.055209	-7.39369	1.42809e-13	5.27165e-12
ENSG00000115556	634.173	0.571435	0.0773038	7.39208	1.44554e-13	5.32685e-12
ENSG00000267868	80.3386	1.1938	0.1615	7.39194	1.44706e-13	5.32685e-12
ENSG00000258469	27.0439	2.62124	0.35478	7.38835	1.48666e-13	5.46507e-12
ENSG00000148842	760.613	0.605268	0.0819598	7.38494	1.52517e-13	5.59891e-12
ENSG00000018408	2041.57	-0.567472	0.0768632	-7.38288	1.54897e-13	5.67841e-12
ENSG00000264968	71.9579	1.32107	0.179145	7.37431	1.65197e-13	6.04765e-12
ENSG00000146842	1081.15	-0.480677	0.0652111	-7.37108	1.69251e-13	6.18757e-12
ENSG00000204569	6083.56	-0.278195	0.0377458	-7.37022	1.70344e-13	6.21896e-12
ENSG00000267649	53.5257	1.69835	0.230561	7.36616	1.75612e-13	6.40251e-12
ENSG00000205659	678.597	-0.615311	0.0835437	-7.36514	1.76963e-13	6.44289e-12
ENSG00000281205	153.565	1.19925	0.162836	7.36476	1.77463e-13	6.45227e-12
ENSG00000170085	529.816	-0.781724	0.106185	-7.36192	1.81287e-13	6.57139e-12
ENSG00000008277	321.634	-0.61305	0.0832747	-7.36177	1.81481e-13	6.57139e-12
ENSG00000102001	112.466	1.06044	0.144042	7.36201	1.81166e-13	6.57139e-12
ENSG00000171793	940.207	-0.518449	0.070459	-7.35816	1.86465e-13	6.74269e-12
ENSG00000196458	2628.68	-0.303697	0.0412757	-7.35777	1.87007e-13	6.75308e-12
ENSG00000248265	140.711	-0.996605	0.135456	-7.35741	1.87507e-13	6.76196e-12
ENSG00000175455	3763.05	-0.538381	0.0731913	-7.3558	1.89784e-13	6.8348e-12
ENSG00000151025	423.518	-0.664218	0.0903581	-7.35095	1.96801e-13	7.07792e-12
ENSG00000151117	592.703	0.568485	0.0773685	7.34775	2.01573e-13	7.23975e-12
ENSG00000257225	30.815	6.39062	0.869957	7.3459	2.04373e-13	7.33039e-12
ENSG00000269924	41.8646	1.74174	0.237274	7.34062	2.12614e-13	7.61569e-12
ENSG00000240219	115.976	1.08121	0.147336	7.33843	2.16116e-13	7.73072e-12
ENSG00000008869	2152.27	-0.450421	0.0613991	-7.33596	2.20146e-13	7.86429e-12
ENSG00000115942	1135.52	-0.424719	0.0579547	-7.32847	2.32788e-13	8.30475e-12
ENSG00000155974	199.295	-0.76406	0.10429	-7.32634	2.36523e-13	8.42669e-12
ENSG00000163009	109.457	-1.25458	0.17129	-7.32432	2.4012e-13	8.54339e-12
ENSG00000137822	1259.11	-0.467618	0.0639127	-7.31652	2.54493e-13	9.04268e-12
ENSG00000173473	6955.35	-0.293285	0.0401015	-7.31358	2.60124e-13	9.23043e-12
ENSG00000073969	3784.49	-0.44173	0.0604048	-7.31284	2.61554e-13	9.26877e-12
ENSG00000169994	34.6697	2.2235	0.304114	7.3114	2.6437e-13	9.35611e-12
ENSG00000275481	133.224	1.19039	0.162818	7.31121	2.64752e-13	9.35714e-12
ENSG00000023909	269.605	-0.962034	0.131737	-7.30268	2.8209e-13	9.95669e-12
ENSG00000167685	1907.72	0.524581	0.071873	7.29872	2.90524e-13	1.02408e-11
ENSG00000236993	27.3475	-2.33621	0.320164	-7.2969	2.94466e-13	1.0366e-11
ENSG00000171747	96.8632	1.24526	0.170741	7.29328	3.02507e-13	1.0635e-11
ENSG00000070614	15995.7	0.551768	0.0757186	7.28709	3.16731e-13	1.11203e-11
ENSG00000082805	1753.21	-0.443333	0.0608466	-7.28607	3.19134e-13	1.11899e-11
ENSG00000146918	3362.03	-0.297622	0.0409083	-7.27535	3.45531e-13	1.20995e-11
ENSG00000103260	1902.64	0.510755	0.0702302	7.27259	3.52666e-13	1.23331e-11
ENSG00000274943	61.1411	2.0457	0.281375	7.27035	3.58548e-13	1.25223e-11
ENSG00000159915	359.545	0.672811	0.0925567	7.26918	3.61689e-13	1.26155e-11
ENSG00000166170	2456.73	-0.48017	0.0661687	-7.25676	3.96485e-13	1.38105e-11
ENSG00000279948	171.718	0.912984	0.125815	7.25658	3.96991e-13	1.38105e-11
ENSG00000145246	382.841	-0.602565	0.0830884	-7.25209	4.10377e-13	1.42575e-11
ENSG00000186088	443.158	-0.632142	0.087195	-7.24974	4.17558e-13	1.44881e-11
ENSG00000259940	68.3967	1.565	0.215898	7.24878	4.20529e-13	1.45721e-11
ENSG00000145075	202.152	-1.86398	0.257409	-7.24134	4.44282e-13	1.53752e-11
ENSG00000078140	3017.53	-0.596961	0.0824492	-7.24035	4.47541e-13	1.54678e-11
ENSG00000179119	1213.15	-0.358963	0.049617	-7.23468	4.66638e-13	1.61069e-11
ENSG00000129355	297.999	-0.643507	0.0889617	-7.23352	4.70616e-13	1.62231e-11
ENSG00000185875	287.585	-0.824481	0.114031	-7.23031	4.81883e-13	1.659e-11
ENSG00000073910	172.036	0.930176	0.128739	7.22528	5.00062e-13	1.71936e-11
ENSG00000137942	4440.39	-0.407274	0.0564513	-7.21461	5.40905e-13	1.85739e-11
ENSG00000187123	173.105	-0.84202	0.116766	-7.21115	5.54821e-13	1.90271e-11
ENSG00000178177	505.089	-0.616847	0.0855948	-7.20659	5.737e-13	1.96492e-11
ENSG00000070388	97.4882	1.69435	0.235301	7.20078	5.98671e-13	2.04781e-11
ENSG00000119943	606.246	0.735843	0.102236	7.19752	6.13183e-13	2.09475e-11
ENSG00000152818	5977.7	-0.235853	0.0327727	-7.19662	6.17224e-13	2.10585e-11
ENSG00000075151	3459.69	-0.518061	0.0720323	-7.19207	6.38186e-13	2.17458e-11
ENSG00000171135	1278.36	0.455809	0.0635004	7.17804	7.07155e-13	2.4065e-11
ENSG00000145012	3706.55	-0.683	0.0951582	-7.17752	7.0989e-13	2.41272e-11
ENSG00000169105	2505.18	0.306666	0.0427516	7.17321	7.32594e-13	2.4867e-11
ENSG00000256235	968.898	0.41142	0.0574108	7.16624	7.70836e-13	2.61317e-11
ENSG00000144827	1146.34	-0.402134	0.0561437	-7.16258	7.91721e-13	2.68056e-11
ENSG00000128271	70.5005	1.46395	0.204639	7.15382	8.43963e-13	2.8538e-11
ENSG00000141252	1382.19	-0.531719	0.0743334	-7.15317	8.47992e-13	2.86378e-11
ENSG00000171055	477.845	-0.825348	0.115413	-7.15123	8.60023e-13	2.90019e-11
ENSG00000173166	465.676	0.979895	0.137027	7.15108	8.60955e-13	2.90019e-11
ENSG00000135932	1824.77	-0.336177	0.0470171	-7.1501	8.67143e-13	2.91366e-11
ENSG00000168000	202.131	0.908418	0.12705	7.1501	8.67148e-13	2.91366e-11
ENSG00000261204	22.1572	2.66139	0.372427	7.14607	8.92994e-13	2.99672e-11
ENSG00000126010	872.191	-0.715426	0.100122	-7.14554	8.96458e-13	3.00274e-11
ENSG00000160683	21.3993	3.14522	0.440171	7.14545	8.97048e-13	3.00274e-11
ENSG00000196167	438.78	-0.98178	0.137413	-7.14472	9.01814e-13	3.01489e-11
ENSG00000230638	147.544	-1.2461	0.174452	-7.14293	9.13635e-13	3.05058e-11
ENSG00000196810	2206.87	0.38753	0.0543194	7.13429	9.7286e-13	3.24425e-11
ENSG00000047849	6039.63	-0.334672	0.0469153	-7.13353	9.78262e-13	3.25818e-11
ENSG00000279495	289.978	1.12714	0.158045	7.13175	9.91032e-13	3.29658e-11
ENSG00000184012	3329.32	-0.442216	0.0620158	-7.1307	9.98604e-13	3.31761e-11
ENSG00000140632	5727.39	-0.329622	0.0462517	-7.1267	1.02805e-12	3.41118e-11
ENSG00000253873	212.929	1.05854	0.148624	7.12225	1.06182e-12	3.51884e-11
ENSG00000169247	83.3224	1.34685	0.189145	7.12075	1.0734e-12	3.55277e-11
ENSG00000229739	27.168	-2.29373	0.322167	-7.1197	1.0816e-12	3.57269e-11
ENSG00000134138	228.619	-0.90886	0.127655	-7.11964	1.0821e-12	3.57269e-11
ENSG00000170476	751.506	0.821082	0.115346	7.11845	1.09145e-12	3.59909e-11
ENSG00000168993	677.728	0.649501	0.0912743	7.11593	1.11164e-12	3.65659e-11
ENSG00000138642	546.431	0.492068	0.0691487	7.11609	1.11033e-12	3.65659e-11
ENSG00000104899	1867.57	0.909991	0.127901	7.11482	1.12058e-12	3.68143e-11
ENSG00000118873	3988.4	-0.301862	0.0424294	-7.11445	1.12358e-12	3.68673e-11
ENSG00000116117	542.311	-0.666058	0.0936535	-7.11194	1.14426e-12	3.74997e-11
ENSG00000124602	54.3865	-1.54687	0.217538	-7.1108	1.15368e-12	3.77618e-11
ENSG00000118194	41.5271	1.73515	0.244088	7.10872	1.17122e-12	3.82888e-11
ENSG00000254648	68.3071	1.23587	0.174048	7.10075	1.2408e-12	4.05134e-11
ENSG00000151458	1769.25	0.364235	0.0513066	7.09919	1.25493e-12	4.09247e-11
ENSG00000204387	3745.35	-0.421169	0.0593667	-7.09437	1.29945e-12	4.23243e-11
ENSG00000131724	2177.55	-0.551597	0.0777542	-7.09411	1.30182e-12	4.23499e-11
ENSG00000249158	341.554	-0.621387	0.0876177	-7.09203	1.32161e-12	4.2941e-11
ENSG00000136828	1580.28	-0.560335	0.0790223	-7.09085	1.33295e-12	4.32565e-11
ENSG00000169760	50.2208	-1.53631	0.216736	-7.0884	1.35669e-12	4.39732e-11
ENSG00000130066	3480.32	-0.502588	0.0710373	-7.07498	1.49466e-12	4.83862e-11
ENSG00000262445	47.9682	1.64191	0.232446	7.0636	1.62246e-12	5.24596e-11
ENSG00000114529	663.518	0.475173	0.0672899	7.06158	1.64622e-12	5.31632e-11
ENSG00000267077	20.2525	3.55228	0.503135	7.06028	1.66169e-12	5.35975e-11
ENSG00000070366	1181.71	-0.438153	0.0620983	-7.0558	1.71606e-12	5.52841e-11
ENSG00000008226	48.4529	1.59539	0.226309	7.04958	1.79454e-12	5.74642e-11
ENSG00000254593	63.0703	1.39845	0.198356	7.05023	1.78626e-12	5.74642e-11
ENSG00000110318	763.561	-0.587206	0.0832957	-7.04966	1.79354e-12	5.74642e-11
ENSG00000244462	4877.99	0.345485	0.0490076	7.04963	1.794e-12	5.74642e-11
ENSG00000100060	234.61	1.59621	0.226424	7.04963	1.79392e-12	5.74642e-11
ENSG00000135541	703.243	-0.526679	0.0747362	-7.04717	1.82588e-12	5.83975e-11
ENSG00000169021	3477.32	0.609535	0.0865151	7.04541	1.84915e-12	5.90705e-11
ENSG00000204323	146.171	1.11407	0.158225	7.04103	1.90824e-12	6.0885e-11
ENSG00000171105	451.613	-0.850001	0.120785	-7.03731	1.95984e-12	6.24564e-11
ENSG00000232355	39.5417	2.01682	0.28663	7.03633	1.97372e-12	6.27482e-11
ENSG00000160951	27.2016	2.35521	0.334713	7.03649	1.97138e-12	6.27482e-11
ENSG00000141497	526.377	-0.693893	0.0986556	-7.03349	2.01431e-12	6.39621e-11
ENSG00000079134	1060.52	-0.413453	0.0588013	-7.03136	2.04529e-12	6.48684e-11
ENSG00000196296	526.461	0.708754	0.100847	7.02801	2.09493e-12	6.63635e-11
ENSG00000069424	445.37	-0.79879	0.113671	-7.02719	2.1074e-12	6.65276e-11
ENSG00000187951	1292.57	-0.367446	0.0522893	-7.02717	2.10762e-12	6.65276e-11
ENSG00000261143	18.6108	4.01116	0.570802	7.02723	2.10681e-12	6.65276e-11
ENSG00000150672	1417.79	-0.398835	0.0568012	-7.0216	2.19336e-12	6.9152e-11
ENSG00000243742	921.051	0.482187	0.0687085	7.01786	2.25292e-12	7.09456e-11
ENSG00000115884	2625.91	0.40708	0.0580301	7.01497	2.29996e-12	7.23412e-11
ENSG00000124496	720.283	0.595339	0.0850484	7.00001	2.55953e-12	8.04103e-11
ENSG00000180104	4270.62	-0.330777	0.0472807	-6.99603	2.63323e-12	8.26282e-11
ENSG00000101974	466.142	-0.762373	0.10903	-6.99234	2.70336e-12	8.47288e-11
ENSG00000080345	2800.37	-0.433868	0.0620816	-6.98867	2.77504e-12	8.68729e-11
ENSG00000198053	435.723	0.515233	0.0737419	6.98698	2.80871e-12	8.78234e-11
ENSG00000033627	6566.91	-0.359013	0.051399	-6.98483	2.85201e-12	8.90726e-11
ENSG00000259826	91.9401	1.07591	0.154227	6.97616	3.03356e-12	9.46315e-11
ENSG00000260805	314.579	0.662779	0.0950265	6.97468	3.06568e-12	9.55212e-11
ENSG00000185019	668.688	-0.566622	0.081276	-6.97157	3.13418e-12	9.75412e-11
ENSG00000126351	1324.06	0.48765	0.0699705	6.96937	3.18358e-12	9.89627e-11
ENSG00000151466	323.311	-0.726738	0.104338	-6.96523	3.27879e-12	1.01803e-10
ENSG00000226180	157.5	1.05519	0.151561	6.96215	3.35127e-12	1.03932e-10
ENSG00000255690	3677.59	0.553268	0.0794972	6.9596	3.41247e-12	1.05707e-10
ENSG00000197816	54.5852	-1.51598	0.217837	-6.95924	3.42124e-12	1.05855e-10
ENSG00000137501	347.998	-0.557074	0.0801366	-6.95156	3.61266e-12	1.11648e-10
ENSG00000197191	572.788	1.23621	0.177941	6.94731	3.72313e-12	1.14928e-10
ENSG00000183291	2693.74	-0.312035	0.0449369	-6.94387	3.81514e-12	1.17632e-10
ENSG00000167281	25.2407	2.53781	0.365512	6.94316	3.83413e-12	1.18081e-10
ENSG00000145476	153.802	-0.924064	0.133096	-6.94285	3.84254e-12	1.18203e-10
ENSG00000129534	1694.99	-0.440284	0.0634173	-6.94265	3.84816e-12	1.18239e-10
ENSG00000152217	805.256	0.733357	0.105671	6.93999	3.92129e-12	1.20346e-10
ENSG00000162078	1396.92	0.7675	0.110599	6.93948	3.93538e-12	1.2064e-10
ENSG00000175414	47.2415	2.08751	0.300928	6.9369	4.00795e-12	1.22723e-10
ENSG00000123600	641.952	-0.478555	0.0689886	-6.93672	4.0131e-12	1.22739e-10
ENSG00000278075	17.8652	4.11169	0.593464	6.92829	4.25954e-12	1.30126e-10
ENSG00000177548	1700.87	-0.396692	0.0572811	-6.92536	4.34871e-12	1.32698e-10
ENSG00000262484	85.1925	1.15797	0.167217	6.92497	4.36069e-12	1.32911e-10
ENSG00000187796	417.889	0.830128	0.1199	6.92349	4.40658e-12	1.34156e-10
ENSG00000235609	63.1347	-1.4701	0.212342	-6.92325	4.4139e-12	1.34225e-10
ENSG00000164168	1737.08	-0.322691	0.0467154	-6.9076	4.92938e-12	1.49729e-10
ENSG00000131626	4012.76	-0.26707	0.0386716	-6.90611	4.98116e-12	1.51129e-10
ENSG00000113391	762.717	-0.728561	0.105507	-6.9053	5.00961e-12	1.51819e-10
ENSG00000278000	49.9659	1.49996	0.217233	6.90486	5.02521e-12	1.52118e-10
ENSG00000134871	49.696	1.85118	0.268279	6.90019	5.19335e-12	1.57029e-10
ENSG00000280351	104.754	1.00734	0.146002	6.89954	5.21705e-12	1.57567e-10
ENSG00000097033	1735.72	-0.633639	0.0919474	-6.89131	5.52794e-12	1.66767e-10
ENSG00000247556	5382.86	-0.51696	0.0750736	-6.88604	5.73662e-12	1.72866e-10
ENSG00000261167	47.5018	-1.49677	0.217546	-6.88026	5.97421e-12	1.79822e-10
ENSG00000169891	1063.28	-0.648403	0.0942726	-6.87795	6.07189e-12	1.82555e-10
ENSG00000101236	999.542	-0.485499	0.0707326	-6.86387	6.70216e-12	2.01277e-10
ENSG00000229689	196.553	1.1094	0.161636	6.86359	6.71507e-12	2.01437e-10
ENSG00000227107	65.1435	1.29306	0.188502	6.85962	6.90418e-12	2.06876e-10
ENSG00000163516	2008.19	-0.294432	0.0429319	-6.85811	6.97772e-12	2.08844e-10
ENSG00000227345	1967.11	-0.413939	0.0603634	-6.85745	7.00992e-12	2.09572e-10
ENSG00000162814	58.4767	-1.81005	0.264179	-6.85162	7.30199e-12	2.18059e-10
ENSG00000161551	500.517	0.536707	0.0784058	6.84524	7.63477e-12	2.27741e-10
ENSG00000012660	7455.24	-0.282921	0.0413474	-6.84254	7.78e-12	2.31813e-10
ENSG00000260686	20.7074	-2.61553	0.382258	-6.84232	7.79227e-12	2.31918e-10
ENSG00000204516	2446.84	0.352036	0.0514897	6.83701	8.08608e-12	2.40185e-10
ENSG00000276791	290.043	0.791604	0.115783	6.83698	8.08811e-12	2.40185e-10
ENSG00000011295	2175.79	-0.389733	0.057008	-6.83646	8.11746e-12	2.40788e-10
ENSG00000047056	2256.13	-0.391997	0.0573648	-6.83341	8.29189e-12	2.45688e-10
ENSG00000137801	3299.4	-0.410543	0.0600884	-6.83233	8.35486e-12	2.47278e-10
ENSG00000188191	315.391	-0.617215	0.0904327	-6.82513	8.78479e-12	2.59713e-10
ENSG00000253298	17.5649	-3.18673	0.467018	-6.82356	8.88092e-12	2.62263e-10
ENSG00000114120	4965.07	1.01968	0.149468	6.82209	8.97228e-12	2.64667e-10
ENSG00000280433	58.7796	-1.38031	0.202397	-6.81981	9.1164e-12	2.68621e-10
ENSG00000140505	28.0716	-2.51602	0.369069	-6.81721	9.2826e-12	2.73215e-10
ENSG00000039139	274.753	-0.650409	0.0954155	-6.8166	9.32194e-12	2.74069e-10
ENSG00000283526	208.644	0.828989	0.121626	6.81587	9.36918e-12	2.75154e-10
ENSG00000258900	61.1404	1.59182	0.2336	6.81428	9.47397e-12	2.77924e-10
ENSG00000259340	15.5603	7.41937	1.08927	6.81131	9.67163e-12	2.8341e-10
ENSG00000165475	506.584	-0.545933	0.080176	-6.80918	9.81563e-12	2.87059e-10
ENSG00000185880	1097.54	0.481184	0.0706673	6.80915	9.81775e-12	2.87059e-10
ENSG00000148339	577.271	0.683214	0.100415	6.80389	1.01829e-11	2.97407e-10
ENSG00000124126	31822.2	-0.322313	0.0474112	-6.79824	1.05906e-11	3.08976e-10
ENSG00000101911	1929.88	-0.419002	0.0616468	-6.79681	1.0696e-11	3.1171e-10
ENSG00000164049	193.621	0.722992	0.106379	6.79638	1.0728e-11	3.12299e-10
ENSG00000166821	689.451	-0.527166	0.0775821	-6.79494	1.08355e-11	3.15083e-10
ENSG00000075407	2637.38	-0.632446	0.0930871	-6.79413	1.08968e-11	3.16521e-10
ENSG00000177839	291.302	-0.662894	0.0976028	-6.79176	1.10776e-11	3.21421e-10
ENSG00000162772	1107.41	-0.478912	0.0705465	-6.7886	1.13227e-11	3.28174e-10
ENSG00000263711	1109.13	-0.68683	0.101178	-6.78835	1.13421e-11	3.28377e-10
ENSG00000162188	81.206	1.09906	0.161931	6.78719	1.14341e-11	3.3068e-10
ENSG00000168385	8149.2	-0.305725	0.045066	-6.78394	1.16944e-11	3.3784e-10
ENSG00000280311	24.8586	2.22443	0.327932	6.78321	1.17537e-11	3.39185e-10
ENSG00000197299	747.904	-0.513437	0.0757123	-6.78143	1.18996e-11	3.43022e-10
ENSG00000143797	1673.21	-0.453247	0.0668576	-6.77929	1.20771e-11	3.47762e-10
ENSG00000232815	238.576	0.814876	0.120308	6.77322	1.25946e-11	3.62273e-10
ENSG00000154556	338.242	-0.612406	0.0904298	-6.77217	1.26862e-11	3.64513e-10
ENSG00000260948	39.3223	-1.71309	0.252988	-6.77144	1.27511e-11	3.6598e-10
ENSG00000197093	32.2305	2.21736	0.327479	6.77102	1.2788e-11	3.66643e-10
ENSG00000164323	1201.66	-0.475854	0.0703195	-6.76703	1.31456e-11	3.76491e-10
ENSG00000125898	2301.65	0.339214	0.0501487	6.76417	1.34075e-11	3.83578e-10
ENSG00000053770	1806.21	-0.339235	0.0501586	-6.76325	1.34932e-11	3.85616e-10
ENSG00000258472	372.775	0.634529	0.0938535	6.76085	1.37187e-11	3.9164e-10
ENSG00000115109	1936.16	-0.444453	0.0657809	-6.75656	1.41304e-11	4.02945e-10
ENSG00000182400	2252.7	-0.40431	0.059841	-6.75641	1.41451e-11	4.02945e-10
ENSG00000162433	2594.64	-0.496585	0.0735046	-6.75583	1.42018e-11	4.04127e-10
ENSG00000214796	1070.58	0.587275	0.086956	6.75371	1.44112e-11	4.09648e-10
ENSG00000254017	15.7216	4.36483	0.646647	6.74994	1.47906e-11	4.19985e-10
ENSG00000134769	1381.15	-0.329497	0.0488195	-6.74928	1.48576e-11	4.21435e-10
ENSG00000166106	555.688	0.643544	0.0953969	6.74597	1.52012e-11	4.30723e-10
ENSG00000159674	82.5985	1.16071	0.172175	6.74148	1.56776e-11	4.43749e-10
ENSG00000258947	1229.71	1.77589	0.263603	6.73702	1.61673e-11	4.57123e-10
ENSG00000256982	60.1126	1.51254	0.224565	6.73542	1.63453e-11	4.61662e-10
ENSG00000148204	47.5586	1.81607	0.269662	6.73463	1.64349e-11	4.63702e-10
ENSG00000160161	57.5485	1.58759	0.235753	6.73411	1.64931e-11	4.6485e-10
ENSG00000144115	2886.66	0.336237	0.049934	6.73364	1.65472e-11	4.65881e-10
ENSG00000160932	5451.92	0.372322	0.0553537	6.72622	1.74123e-11	4.89718e-10
ENSG00000066336	16.1147	3.59338	0.534431	6.72374	1.77114e-11	4.97603e-10
ENSG00000103855	2533.04	0.362082	0.0538536	6.72346	1.77457e-11	4.98043e-10
ENSG00000232303	32.3427	1.96049	0.2916	6.72321	1.77765e-11	4.98378e-10
ENSG00000166439	1768.57	-0.490398	0.0730039	-6.71742	1.84964e-11	5.18017e-10
ENSG00000237487	41.5594	-2.01024	0.299456	-6.71295	1.90734e-11	5.33613e-10
ENSG00000260300	83.8553	-1.32964	0.198079	-6.71269	1.91063e-11	5.33971e-10
ENSG00000280758	41.7701	1.60774	0.23964	6.70899	1.95976e-11	5.47127e-10
ENSG00000111249	92.0836	1.03018	0.153613	6.70637	1.9953e-11	5.56464e-10
ENSG00000107651	2084.02	-0.400236	0.0596865	-6.70564	2.00528e-11	5.58663e-10
ENSG00000127328	1690.02	-0.682434	0.101843	-6.70085	2.07217e-11	5.76691e-10
ENSG00000277758	115.414	-1.1198	0.167185	-6.69794	2.11371e-11	5.87637e-10
ENSG00000185686	2262.41	0.392177	0.0585623	6.69674	2.13114e-11	5.91864e-10
ENSG00000110330	3408.76	-0.398854	0.0595668	-6.69591	2.14333e-11	5.9463e-10
ENSG00000153914	5247.67	-0.557664	0.0832964	-6.69494	2.15762e-11	5.9797e-10
ENSG00000009694	366.167	-0.988417	0.147737	-6.69039	2.22577e-11	6.16214e-10
ENSG00000156136	670.611	-0.509823	0.0762083	-6.68986	2.23386e-11	6.17811e-10
ENSG00000148019	637.084	-0.520937	0.0778781	-6.68914	2.24491e-11	6.2022e-10
ENSG00000106692	3216.93	-0.353441	0.052843	-6.68852	2.25441e-11	6.22198e-10
ENSG00000110583	3189.23	-0.325048	0.0486074	-6.68721	2.27469e-11	6.27144e-10
ENSG00000127124	585.147	-0.464647	0.0694847	-6.68703	2.27747e-11	6.27259e-10
ENSG00000187164	3237.27	-0.380073	0.0568673	-6.68351	2.33292e-11	6.41866e-10
ENSG00000255050	269.087	0.818039	0.122438	6.68122	2.36957e-11	6.51277e-10
ENSG00000152402	175.056	-1.07964	0.161613	-6.68037	2.38337e-11	6.54374e-10
ENSG00000259762	89.9883	1.50042	0.224606	6.68022	2.38576e-11	6.54374e-10
ENSG00000281566	41.7157	-1.56634	0.234493	-6.67968	2.39461e-11	6.55447e-10
ENSG00000196693	1882.05	-0.565458	0.0846525	-6.67976	2.39339e-11	6.55447e-10
ENSG00000165392	659.28	-0.47016	0.0704011	-6.67831	2.41716e-11	6.60939e-10
ENSG00000198089	2037.56	-0.870638	0.130384	-6.67751	2.43037e-11	6.63868e-10
ENSG00000158528	293.265	-0.702208	0.105251	-6.67174	2.52792e-11	6.89577e-10
ENSG00000023445	326.173	-0.691912	0.10371	-6.67164	2.52968e-11	6.89577e-10
ENSG00000025434	1279.42	0.478266	0.0716937	6.67097	2.54124e-11	6.9202e-10
ENSG00000116685	1784.22	0.429782	0.0644422	6.66926	2.57094e-11	6.99389e-10
ENSG00000213221	40.3791	1.69146	0.253703	6.6671	2.60915e-11	7.08334e-10
ENSG00000249115	1609.92	-0.37267	0.0558964	-6.66716	2.60798e-11	7.08334e-10
ENSG00000119242	1397.3	-0.590924	0.0886691	-6.66437	2.65802e-11	7.20335e-10
ENSG00000268858	2013.2	0.4166	0.0625119	6.66433	2.65877e-11	7.20335e-10
ENSG00000114978	4429.65	-0.42437	0.0637202	-6.65989	2.7403e-11	7.40913e-10
ENSG00000260966	85.1902	-1.44783	0.217392	-6.66002	2.73791e-11	7.40913e-10
ENSG00000176293	1813.74	0.314618	0.0472457	6.65919	2.75334e-11	7.4368e-10
ENSG00000159212	133.213	-0.855004	0.128447	-6.65648	2.80458e-11	7.56752e-10
ENSG00000007392	2503.69	0.365923	0.0550562	6.64636	3.00438e-11	8.09841e-10
ENSG00000061936	5156.91	0.342133	0.0514887	6.64482	3.03591e-11	8.17511e-10
ENSG00000107771	2051.86	-0.296987	0.0447009	-6.64387	3.05554e-11	8.21966e-10
ENSG00000162437	921.835	-0.380412	0.0573066	-6.63819	3.17562e-11	8.53402e-10
ENSG00000122965	2707.06	-0.308825	0.0465628	-6.63244	3.30192e-11	8.86448e-10
ENSG00000132122	225.399	-0.710258	0.107122	-6.63039	3.3481e-11	8.97939e-10
ENSG00000113456	1481.22	-0.355245	0.0535798	-6.63021	3.3522e-11	8.98133e-10
ENSG00000075213	30.4198	-2.00059	0.301813	-6.62857	3.38952e-11	9.07218e-10
ENSG00000143162	7158.55	-0.298022	0.0449657	-6.62775	3.40834e-11	9.11336e-10
ENSG00000163435	6340.59	-0.483628	0.0729726	-6.62754	3.41334e-11	9.11756e-10
ENSG00000070087	4165.89	0.310841	0.0469044	6.62711	3.42318e-11	9.13468e-10
ENSG00000264112	787.962	-1.09659	0.165482	-6.62662	3.43462e-11	9.15601e-10
ENSG00000280088	107.518	-1.32188	0.199628	-6.62173	3.55029e-11	9.44541e-10
ENSG00000262468	445.403	1.01818	0.153763	6.62176	3.54958e-11	9.44541e-10
ENSG00000153993	117.109	-0.927871	0.140158	-6.62018	3.58753e-11	9.53494e-10
ENSG00000175206	65.331	1.70505	0.257616	6.61858	3.6266e-11	9.62915e-10
ENSG00000166750	1262.46	-0.400462	0.0605076	-6.61838	3.63146e-11	9.63242e-10
ENSG00000153936	1292.94	-0.695832	0.105169	-6.61632	3.6825e-11	9.75807e-10
ENSG00000075975	1666.98	-0.392597	0.0593678	-6.61297	3.76696e-11	9.97194e-10
ENSG00000261226	231.436	0.902599	0.136496	6.61262	3.77584e-11	9.9855e-10
ENSG00000279432	31.2252	2.19979	0.332735	6.61122	3.81173e-11	1.00704e-09
ENSG00000198131	1466.92	0.342889	0.0518961	6.60721	3.91624e-11	1.03362e-09
ENSG00000149231	242.92	-0.738863	0.111843	-6.60628	3.94096e-11	1.03911e-09
ENSG00000214248	24.5483	2.10289	0.318489	6.6027	4.03749e-11	1.06351e-09
ENSG00000058091	276.308	-0.705938	0.106922	-6.60235	4.04693e-11	1.06494e-09
ENSG00000117155	710.339	-0.499178	0.0756184	-6.60127	4.07645e-11	1.07165e-09
ENSG00000135842	2428.93	-0.363716	0.0551008	-6.60092	4.08622e-11	1.07316e-09
ENSG00000046604	3658.06	-0.265804	0.0402883	-6.59755	4.18003e-11	1.09671e-09
ENSG00000271698	24.1411	2.14189	0.324661	6.59732	4.18646e-11	1.09732e-09
ENSG00000232913	19.6499	2.46253	0.373312	6.59644	4.21136e-11	1.10275e-09
ENSG00000178568	824.831	-0.519468	0.0787647	-6.59519	4.24725e-11	1.11106e-09
ENSG00000147606	63.2176	-1.35622	0.205659	-6.59453	4.26602e-11	1.11487e-09
ENSG00000117523	16029.2	-0.364343	0.0552549	-6.59386	4.28541e-11	1.11884e-09
ENSG00000172466	4783.61	0.425089	0.0644887	6.59168	4.34885e-11	1.1334e-09
ENSG00000078814	1856.06	1.27971	0.194141	6.59165	4.34973e-11	1.1334e-09
ENSG00000162607	2434.5	-0.392917	0.0596625	-6.58567	4.52841e-11	1.17881e-09
ENSG00000111424	4687.26	-0.368018	0.0559303	-6.57995	4.70604e-11	1.22385e-09
ENSG00000265806	70.7597	1.39166	0.211509	6.57967	4.71479e-11	1.22492e-09
ENSG00000182141	431.067	0.763192	0.116035	6.57725	4.79231e-11	1.24385e-09
ENSG00000205634	99.4248	1.11219	0.169243	6.57155	4.97955e-11	1.29118e-09
ENSG00000129159	716.571	0.696961	0.10618	6.56393	5.24079e-11	1.35633e-09
ENSG00000244879	946.334	-0.910955	0.138782	-6.56392	5.24098e-11	1.35633e-09
ENSG00000102893	3021.77	-0.292863	0.0446311	-6.56187	5.31355e-11	1.37377e-09
ENSG00000115392	471.436	-0.46874	0.0714472	-6.56065	5.35741e-11	1.38376e-09
ENSG00000183117	398.175	-0.556789	0.0849078	-6.55757	5.46908e-11	1.41124e-09
ENSG00000104983	136.769	-0.935162	0.142639	-6.55614	5.52169e-11	1.42343e-09
ENSG00000233695	288.986	0.768547	0.117247	6.55493	5.56664e-11	1.43363e-09
ENSG00000167778	1885.43	-0.399135	0.0609125	-6.55261	5.65414e-11	1.45475e-09
ENSG00000203791	213.905	-0.689353	0.105293	-6.54699	5.87073e-11	1.50902e-09
ENSG00000170271	120.752	0.891236	0.136142	6.54635	5.89584e-11	1.51401e-09
ENSG00000262966	25.2404	2.12903	0.325403	6.54275	6.03974e-11	1.54946e-09
ENSG00000271151	87.8355	1.16678	0.178484	6.53719	6.26864e-11	1.60663e-09
ENSG00000109063	70.9332	-1.20822	0.184899	-6.53447	6.38345e-11	1.63448e-09
ENSG00000182621	1113.26	-0.558035	0.0854348	-6.53171	6.50238e-11	1.66333e-09
ENSG00000204314	839.865	0.478725	0.0733193	6.52932	6.60707e-11	1.68849e-09
ENSG00000101665	380.277	0.667656	0.102394	6.52047	7.00897e-11	1.78947e-09
ENSG00000277311	30.6254	1.77	0.271723	6.51399	7.31828e-11	1.86486e-09
ENSG00000156110	3013.02	-0.702636	0.107864	-6.5141	7.31279e-11	1.86486e-09
ENSG00000197653	48.157	-1.5941	0.244814	-6.51149	7.44065e-11	1.89423e-09
ENSG00000136854	743.211	-0.496802	0.0763427	-6.50753	7.63983e-11	1.94308e-09
ENSG00000065613	2159.12	-0.561283	0.0863463	-6.50038	8.01188e-11	2.03575e-09
ENSG00000165983	603.759	-0.539069	0.0829322	-6.50011	8.02612e-11	2.03742e-09
ENSG00000162267	30.2494	1.94344	0.299088	6.49788	8.1459e-11	2.06586e-09
ENSG00000106258	27.6621	-2.06104	0.317244	-6.49671	8.20935e-11	2.07798e-09
ENSG00000171155	1418.6	-0.401278	0.0617658	-6.49676	8.20678e-11	2.07798e-09
ENSG00000242028	530.192	0.621591	0.0957011	6.49513	8.29619e-11	2.09796e-09
ENSG00000185352	606.536	-0.530133	0.0816559	-6.49228	8.45466e-11	2.13601e-09
ENSG00000128791	1273.95	-0.687127	0.105946	-6.48563	8.83612e-11	2.23026e-09
ENSG00000188981	153.733	1.18355	0.182521	6.48445	8.90553e-11	2.24565e-09
ENSG00000165730	176.807	-1.00398	0.154842	-6.48389	8.93887e-11	2.25192e-09
ENSG00000114251	117.229	-1.03464	0.159654	-6.48056	9.1383e-11	2.29998e-09
ENSG00000206344	186.152	0.883897	0.136403	6.48005	9.16913e-11	2.30555e-09
ENSG00000254481	21.4102	5.42715	0.837972	6.47653	9.38578e-11	2.3578e-09
ENSG00000273066	276.098	0.647264	0.0999625	6.47507	9.47684e-11	2.37843e-09
ENSG00000126091	124.531	-0.983817	0.151975	-6.47356	9.57224e-11	2.4001e-09
ENSG00000171222	1249.84	0.481337	0.0744071	6.46897	9.86743e-11	2.47179e-09
ENSG00000236104	1571.62	0.384317	0.0594439	6.4652	1.01166e-10	2.53183e-09
ENSG00000055211	1364.31	-0.376922	0.0583116	-6.46393	1.02017e-10	2.55072e-09
ENSG00000126804	1949.08	-0.373659	0.0578208	-6.46235	1.03089e-10	2.57509e-09
ENSG00000129691	1515.36	-0.482243	0.0746299	-6.4618	1.03468e-10	2.58213e-09
ENSG00000070413	3063.97	-0.843458	0.130564	-6.4601	1.04631e-10	2.6087e-09
ENSG00000160685	5046.82	0.40544	0.0628261	6.45337	1.09387e-10	2.72228e-09
ENSG00000139546	1753.89	0.328724	0.0509383	6.45337	1.09391e-10	2.72228e-09
ENSG00000112996	1799.48	-0.337932	0.0523672	-6.45311	1.09576e-10	2.72432e-09
ENSG00000089022	2384.16	-0.293509	0.0454931	-6.45173	1.10578e-10	2.74626e-09
ENSG00000178404	18.6786	2.63889	0.409027	6.45161	1.10665e-10	2.74626e-09
ENSG00000068885	1164.53	-0.644247	0.0998884	-6.44967	1.12096e-10	2.7792e-09
ENSG00000079974	1221.63	-0.372848	0.0578635	-6.44358	1.16685e-10	2.89025e-09
ENSG00000257847	11.5911	6.99393	1.08573	6.44166	1.18175e-10	2.92444e-09
ENSG00000160062	159.68	-0.842025	0.13072	-6.44144	1.18345e-10	2.92592e-09
ENSG00000219608	14.7652	3.82952	0.594939	6.43683	1.21992e-10	3.01328e-09
ENSG00000066933	2752.37	-0.327255	0.0508521	-6.43542	1.23135e-10	3.03871e-09
ENSG00000185040	32.9498	1.74156	0.270703	6.43347	1.24726e-10	3.0751e-09
ENSG00000114670	286.026	-0.755996	0.117519	-6.43294	1.25155e-10	3.08283e-09
ENSG00000124920	375.583	0.73726	0.114619	6.43226	1.25718e-10	3.09382e-09
ENSG00000204839	1787.05	0.858841	0.133549	6.4309	1.2685e-10	3.11881e-09
ENSG00000167861	12728.6	0.336694	0.0523607	6.43029	1.2736e-10	3.12845e-09
ENSG00000249129	107.033	0.916825	0.142585	6.43004	1.27569e-10	3.13067e-09
ENSG00000126773	3459.4	-0.355095	0.0552548	-6.42651	1.30569e-10	3.20134e-09
ENSG00000182732	24.3226	-2.26616	0.35274	-6.42446	1.32337e-10	3.2417e-09
ENSG00000117643	434.106	0.519677	0.0809008	6.42364	1.33058e-10	3.25636e-09
ENSG00000229419	92.4797	1.19136	0.185486	6.42291	1.33691e-10	3.26584e-09
ENSG00000204282	898.636	0.980773	0.152697	6.42301	1.33606e-10	3.26584e-09
ENSG00000109065	1774.91	-0.283615	0.0441631	-6.42199	1.34503e-10	3.28267e-09
ENSG00000124299	957.031	-0.336093	0.0523367	-6.42174	1.34727e-10	3.2851e-09
ENSG00000233435	181.789	0.793961	0.123658	6.42063	1.35715e-10	3.30617e-09
ENSG00000072818	318.936	0.608552	0.0947936	6.41976	1.36493e-10	3.32207e-09
ENSG00000266980	32.2396	1.88434	0.293544	6.41929	1.36907e-10	3.32911e-09
ENSG00000234840	174.066	-0.924153	0.143988	-6.41826	1.37845e-10	3.34884e-09
ENSG00000242349	70.6726	1.34516	0.209647	6.4163	1.3963e-10	3.38911e-09
ENSG00000236384	15.5465	-3.20685	0.499893	-6.41507	1.40754e-10	3.41328e-09
ENSG00000120262	334.388	-0.6664	0.103899	-6.41394	1.41808e-10	3.43464e-09
ENSG00000130363	719.959	-0.420908	0.0656249	-6.41385	1.41893e-10	3.43464e-09
ENSG00000134744	2038.85	-0.431396	0.0672703	-6.41288	1.42798e-10	3.45027e-09
ENSG00000171703	2264.28	0.385568	0.0601238	6.41291	1.42772e-10	3.45027e-09
ENSG00000133246	48.8284	1.36891	0.213558	6.41001	1.45515e-10	3.51271e-09
ENSG00000213033	34.0793	1.68039	0.26227	6.40709	1.48326e-10	3.57731e-09
ENSG00000258056	316.831	0.686522	0.107155	6.40683	1.48574e-10	3.58005e-09
ENSG00000269514	254.207	0.776195	0.121164	6.40614	1.49251e-10	3.59311e-09
ENSG00000234880	17.0959	6.8435	1.06838	6.40548	1.49896e-10	3.60538e-09
ENSG00000181085	3698.74	0.982501	0.153467	6.40204	1.53315e-10	3.68428e-09
ENSG00000136492	950.7	-0.777154	0.121403	-6.40146	1.53901e-10	3.69501e-09
ENSG00000227473	289.092	1.06067	0.165716	6.40053	1.54841e-10	3.71423e-09
ENSG00000277504	29.2599	1.90912	0.298351	6.39893	1.56469e-10	3.7499e-09
ENSG00000197943	429.51	-0.548149	0.0856736	-6.39811	1.57314e-10	3.76337e-09
ENSG00000273464	119.936	-1.07855	0.168572	-6.39816	1.5726e-10	3.76337e-09
ENSG00000188234	531.318	-0.524905	0.0820535	-6.3971	1.58356e-10	3.78487e-09
ENSG00000186472	1852.65	-0.521605	0.0816699	-6.38674	1.69455e-10	4.04652e-09
ENSG00000197535	3279.13	-0.258131	0.0404214	-6.386	1.70276e-10	4.06249e-09
ENSG00000109956	43.8109	1.51756	0.237682	6.38482	1.71595e-10	4.09028e-09
ENSG00000110080	1899.43	0.412137	0.0645653	6.38326	1.73362e-10	4.12868e-09
ENSG00000240376	36.8825	2.14414	0.33603	6.38078	1.76184e-10	4.19214e-09
ENSG00000204130	1417.29	-0.513057	0.0804335	-6.37864	1.78663e-10	4.24732e-09
ENSG00000178342	15.7722	3.94359	0.618332	6.37779	1.79658e-10	4.26715e-09
ENSG00000117399	3609.59	0.452159	0.0709156	6.37601	1.81763e-10	4.31329e-09
ENSG00000182318	413.026	0.484017	0.0759507	6.37279	1.85624e-10	4.40099e-09
ENSG00000128482	59.8137	1.63774	0.257209	6.36735	1.92319e-10	4.55566e-09
ENSG00000162704	6887.26	-0.297822	0.0468034	-6.36324	1.97537e-10	4.67509e-09
ENSG00000234494	224.334	0.656634	0.103202	6.36261	1.98348e-10	4.69011e-09
ENSG00000254966	71.5175	1.24117	0.195161	6.35972	2.02116e-10	4.77496e-09
ENSG00000198589	6959.08	-0.252317	0.0396763	-6.35939	2.02562e-10	4.78125e-09
ENSG00000100311	1287.76	-0.37787	0.0594402	-6.35715	2.05536e-10	4.84716e-09
ENSG00000156042	203.745	-0.681095	0.107149	-6.35654	2.06344e-10	4.86188e-09
ENSG00000099282	2451.68	0.308104	0.0484748	6.35596	2.07131e-10	4.8761e-09
ENSG00000198431	18170	-0.422747	0.0665165	-6.35552	2.07717e-10	4.88559e-09
ENSG00000257185	18.8482	-2.47638	0.389688	-6.35478	2.08722e-10	4.90489e-09
ENSG00000243064	118.603	0.99848	0.157182	6.35236	2.1203e-10	4.97821e-09
ENSG00000175928	1313.39	0.562198	0.0885288	6.35046	2.14677e-10	5.03591e-09
ENSG00000100578	1452.89	-0.402056	0.0633181	-6.34977	2.15633e-10	5.05387e-09
ENSG00000234338	75.4418	-1.09895	0.173193	-6.34524	2.22079e-10	5.20037e-09
ENSG00000186312	479.905	0.605294	0.095405	6.34447	2.23198e-10	5.22197e-09
ENSG00000083642	3644.59	-0.573791	0.0904748	-6.342	2.26804e-10	5.30166e-09
ENSG00000128311	627.054	0.521403	0.0822979	6.33555	2.36493e-10	5.5233e-09
ENSG00000141627	1444.82	-0.455638	0.0719397	-6.33361	2.39486e-10	5.58828e-09
ENSG00000111405	31.8708	1.71782	0.271376	6.33004	2.45098e-10	5.71422e-09
ENSG00000245060	650.119	0.455663	0.0719888	6.32963	2.4575e-10	5.72441e-09
ENSG00000100523	901.366	-0.558951	0.0883213	-6.32861	2.47378e-10	5.75729e-09
ENSG00000184113	59.0629	1.29811	0.205122	6.32846	2.47618e-10	5.75782e-09
ENSG00000164074	554.108	-0.455169	0.0719291	-6.32803	2.48318e-10	5.76906e-09
ENSG00000167695	462.396	-0.479307	0.0757727	-6.3256	2.52253e-10	5.85536e-09
ENSG00000240230	1116.3	0.559538	0.0885087	6.32184	2.5847e-10	5.99444e-09
ENSG00000238286	64.0487	1.42738	0.225805	6.3213	2.59367e-10	6.00998e-09
ENSG00000233622	679.859	-0.462938	0.0732607	-6.31905	2.63174e-10	6.09289e-09
ENSG00000145284	67.2368	-1.30005	0.20591	-6.31369	2.72458e-10	6.29687e-09
ENSG00000272892	74.752	1.05927	0.16777	6.31379	2.72281e-10	6.29687e-09
ENSG00000132824	8632.35	-0.242926	0.0384827	-6.31259	2.7441e-10	6.33646e-09
ENSG00000186687	904.634	-0.653642	0.103573	-6.31093	2.77366e-10	6.39916e-09
ENSG00000104881	7554.55	-0.405698	0.0642925	-6.31019	2.78688e-10	6.42408e-09
ENSG00000242258	16.2402	6.76863	1.07278	6.30945	2.80033e-10	6.44949e-09
ENSG00000152234	17060.6	0.30513	0.0483829	6.30656	2.85308e-10	6.56529e-09
ENSG00000049245	3197.31	-0.363049	0.0575903	-6.30399	2.90075e-10	6.66922e-09
ENSG00000009724	87.8345	-1.03587	0.164346	-6.303	2.91936e-10	6.70041e-09
ENSG00000132825	974.687	0.388188	0.0615869	6.3031	2.9175e-10	6.70041e-09
ENSG00000142549	82.6338	1.35692	0.215336	6.30142	2.94935e-10	6.7634e-09
ENSG00000198363	3016.69	-0.37519	0.0595707	-6.29823	3.01063e-10	6.89798e-09
ENSG00000203772	234.449	1.15562	0.183659	6.29222	3.12958e-10	7.16433e-09
ENSG00000278540	13057.9	-0.280523	0.0445836	-6.29208	3.13234e-10	7.16449e-09
ENSG00000143554	2327.58	0.558652	0.08881	6.29042	3.16602e-10	7.23531e-09
ENSG00000167851	14.113	3.75254	0.596602	6.28985	3.17769e-10	7.25573e-09
ENSG00000068354	926.075	0.375718	0.0597729	6.28577	3.26238e-10	7.44271e-09
ENSG00000187634	977.106	0.699726	0.111385	6.28207	3.3409e-10	7.60423e-09
ENSG00000203985	550.715	0.541098	0.0861342	6.28203	3.34177e-10	7.60423e-09
ENSG00000138172	70.1453	1.25147	0.199206	6.28225	3.337e-10	7.60423e-09
ENSG00000173875	1624.29	0.324895	0.0517275	6.2809	3.36619e-10	7.65327e-09
ENSG00000137819	214.949	0.691936	0.110188	6.2796	3.39446e-10	7.71094e-09
ENSG00000257151	199.377	-1.6468	0.262312	-6.27801	3.42933e-10	7.7835e-09
ENSG00000279048	167.064	0.717804	0.114387	6.27523	3.49114e-10	7.91702e-09
ENSG00000172296	1190.91	-0.421344	0.0671481	-6.27485	3.49961e-10	7.92947e-09
ENSG00000172292	3319.08	-0.348392	0.055535	-6.27337	3.53307e-10	7.99846e-09
ENSG00000184616	154.154	0.866167	0.138081	6.27287	3.54458e-10	8.01769e-09
ENSG00000077009	25.5413	1.9554	0.311928	6.26875	3.63954e-10	8.22549e-09
ENSG00000257093	3950.51	-0.314029	0.0501248	-6.26495	3.72939e-10	8.42139e-09
ENSG00000151150	2636.11	-0.558979	0.0892267	-6.26471	3.73512e-10	8.42717e-09
ENSG00000171631	1072.15	0.465541	0.0743633	6.26036	3.84092e-10	8.65852e-09
ENSG00000188681	2494.52	-0.344764	0.0550784	-6.25952	3.86175e-10	8.69811e-09
ENSG00000180769	95.0602	-1.2005	0.191905	-6.25569	3.95756e-10	8.90636e-09
ENSG00000241494	20.2825	3.82609	0.612206	6.24967	4.11317e-10	9.24871e-09
ENSG00000114248	280.62	0.658728	0.105406	6.2494	4.12019e-10	9.25668e-09
ENSG00000240875	32.8162	-1.72428	0.275959	-6.24832	4.14898e-10	9.31347e-09
ENSG00000145725	2099.05	-0.44559	0.0713167	-6.24805	4.156e-10	9.32136e-09
ENSG00000254973	94.1292	-0.962929	0.154126	-6.2477	4.16551e-10	9.32696e-09
ENSG00000070731	761.674	0.605959	0.0969892	6.2477	4.16549e-10	9.32696e-09
ENSG00000158008	80.2953	1.03848	0.166275	6.24558	4.22239e-10	9.44635e-09
ENSG00000250539	161.702	0.729158	0.116938	6.23542	4.50556e-10	1.00714e-08
ENSG00000265293	51.0902	1.89262	0.303581	6.2343	4.53799e-10	1.01354e-08
ENSG00000232986	25.1793	2.44581	0.392348	6.23378	4.55303e-10	1.01604e-08
ENSG00000113621	1258.44	0.355839	0.0571001	6.23184	4.60981e-10	1.02785e-08
ENSG00000278932	1134.27	0.408988	0.0656413	6.23065	4.6451e-10	1.03485e-08
ENSG00000258479	14.3489	3.79198	0.608678	6.22986	4.66856e-10	1.03833e-08
ENSG00000236670	73.0751	2.0421	0.327791	6.22988	4.66801e-10	1.03833e-08
ENSG00000081803	508.785	-0.436192	0.0700388	-6.22787	4.72824e-10	1.05073e-08
ENSG00000196268	932.491	-0.876481	0.140836	-6.22342	4.86425e-10	1.08005e-08
ENSG00000226416	110.548	1.11167	0.178659	6.22228	4.89978e-10	1.08703e-08
ENSG00000150764	1231.61	-0.31305	0.0503291	-6.22007	4.96941e-10	1.10156e-08
ENSG00000166886	1320.44	0.429696	0.0690944	6.21897	5.00434e-10	1.10838e-08
ENSG00000119729	750.208	-0.546821	0.0879454	-6.21773	5.04394e-10	1.11622e-08
ENSG00000138134	466.042	-0.501076	0.0806261	-6.21481	5.13876e-10	1.13626e-08
ENSG00000123965	176.851	0.711173	0.114504	6.21088	5.26876e-10	1.16403e-08
ENSG00000085999	464.432	-0.593064	0.0954967	-6.21031	5.28797e-10	1.16731e-08
ENSG00000179715	197.132	-0.805631	0.129731	-6.20999	5.29872e-10	1.16871e-08
ENSG00000149781	291.823	0.982491	0.158238	6.20896	5.3337e-10	1.17545e-08
ENSG00000197353	17.2618	3.6732	0.591713	6.20774	5.37511e-10	1.18359e-08
ENSG00000253506	187.852	6.03849	0.973192	6.20483	5.47558e-10	1.20472e-08
ENSG00000271122	416.059	-0.578679	0.0932759	-6.20395	5.50629e-10	1.2104e-08
ENSG00000259881	407.517	1.3709	0.220976	6.20383	5.5105e-10	1.2104e-08
ENSG00000261434	35.6465	1.57228	0.253553	6.20099	5.6108e-10	1.23141e-08
ENSG00000145907	9585.84	-0.331385	0.0534514	-6.19973	5.65588e-10	1.24028e-08
ENSG00000155324	1105	0.386709	0.0624457	6.19272	5.91335e-10	1.29567e-08
ENSG00000123933	4300.79	0.626161	0.101187	6.18816	6.08694e-10	1.33261e-08
ENSG00000251151	840.047	0.585969	0.0947344	6.18539	6.19495e-10	1.35514e-08
ENSG00000160113	2724.01	0.312437	0.0505301	6.18317	6.28264e-10	1.37319e-08
ENSG00000233175	449.227	0.638163	0.103252	6.18063	6.38465e-10	1.39434e-08
ENSG00000280054	61.4042	1.48641	0.240596	6.17802	6.4912e-10	1.41645e-08
ENSG00000139174	84.3468	1.04814	0.169707	6.17616	6.56806e-10	1.43204e-08
ENSG00000068305	1619.23	-0.369099	0.0597729	-6.17502	6.61557e-10	1.44122e-08
ENSG00000261286	86.4904	1.04422	0.169182	6.17215	6.7367e-10	1.46641e-08
ENSG00000225345	38.4956	-1.95925	0.317476	-6.17133	6.77177e-10	1.47163e-08
ENSG00000258366	107.292	-1.07528	0.174236	-6.1714	6.76877e-10	1.47163e-08
ENSG00000005108	127.097	-0.975191	0.158075	-6.16915	6.86589e-10	1.49086e-08
ENSG00000187240	2164.91	-0.435223	0.0705954	-6.16503	7.04697e-10	1.52893e-08
ENSG00000105227	380.187	0.629195	0.102124	6.16111	7.22374e-10	1.56601e-08
ENSG00000126005	2310.18	-0.539888	0.0876526	-6.1594	7.30194e-10	1.58167e-08
ENSG00000174498	242.473	0.60787	0.098732	6.15676	7.4246e-10	1.60693e-08
ENSG00000136826	396.516	0.485884	0.0789499	6.15433	7.53955e-10	1.63048e-08
ENSG00000129003	3434.91	-0.645413	0.104913	-6.15192	7.65527e-10	1.65416e-08
ENSG00000171456	7152.27	-0.319459	0.0519307	-6.15164	7.66877e-10	1.65573e-08
ENSG00000262877	516.718	0.827893	0.1346	6.15075	7.71166e-10	1.66364e-08
ENSG00000223812	75.9073	-1.28019	0.208166	-6.14985	7.75563e-10	1.67177e-08
ENSG00000136010	454.654	-0.478155	0.0777585	-6.14923	7.786e-10	1.67696e-08
ENSG00000204514	667.031	-0.535828	0.0871462	-6.14861	7.81663e-10	1.68083e-08
ENSG00000160214	1145.49	-0.453282	0.0737207	-6.14863	7.81528e-10	1.68083e-08
ENSG00000116194	19.1529	2.50094	0.406924	6.14595	7.94848e-10	1.7078e-08
ENSG00000225828	366.008	0.565741	0.0920665	6.14492	8.00015e-10	1.71613e-08
ENSG00000140848	418.399	-0.553488	0.0900721	-6.14495	7.99907e-10	1.71613e-08
ENSG00000184730	367.545	0.786601	0.12807	6.14197	8.15042e-10	1.74695e-08
ENSG00000283439	16.4313	5.45863	0.888904	6.14085	8.20799e-10	1.75787e-08
ENSG00000149090	102.627	-1.04742	0.170601	-6.1396	8.27284e-10	1.77034e-08
ENSG00000062725	2082.64	-0.319977	0.0521215	-6.13906	8.30126e-10	1.77499e-08
ENSG00000133983	117.426	-0.795865	0.129659	-6.13816	8.34839e-10	1.78363e-08
ENSG00000069869	1892.21	-0.276964	0.0451233	-6.13794	8.36009e-10	1.7847e-08
ENSG00000245275	264.638	0.770191	0.125485	6.13772	8.3715e-10	1.7857e-08
ENSG00000274767	67.9659	1.29403	0.21096	6.13399	8.57027e-10	1.82663e-08
ENSG00000105755	459.242	0.533729	0.087028	6.13284	8.63234e-10	1.83838e-08
ENSG00000138686	446.758	-0.509383	0.0830698	-6.132	8.67837e-10	1.84671e-08
ENSG00000278570	37.4241	-1.54292	0.251709	-6.12976	8.80094e-10	1.87129e-08
ENSG00000177363	38.0858	1.73017	0.282408	6.12648	8.98446e-10	1.90879e-08
ENSG00000272604	27.7866	-1.87439	0.306108	-6.12329	9.166e-10	1.9458e-08
ENSG00000157764	989.451	-0.341746	0.0558229	-6.12196	9.2429e-10	1.96056e-08
ENSG00000014824	3313.07	-0.395107	0.0645911	-6.11705	9.53258e-10	2.02039e-08
ENSG00000092295	138.697	0.837792	0.136997	6.11541	9.63091e-10	2.0396e-08
ENSG00000280660	24.5246	-2.25085	0.368205	-6.11303	9.77562e-10	2.0686e-08
ENSG00000117115	770.566	0.403997	0.066098	6.11209	9.83355e-10	2.0792e-08
ENSG00000087299	1085.04	-0.31011	0.0507387	-6.11189	9.84579e-10	2.08014e-08
ENSG00000269974	90.981	0.937926	0.153513	6.10976	9.97798e-10	2.10639e-08
ENSG00000272588	65.8608	-1.09254	0.178926	-6.1061	1.02098e-09	2.15362e-08
ENSG00000254039	100.394	0.860442	0.140934	6.10531	1.02603e-09	2.16255e-08
ENSG00000105270	290.764	0.640389	0.104906	6.10442	1.03175e-09	2.17289e-08
ENSG00000224358	52.4497	1.37831	0.225853	6.10267	1.04312e-09	2.19336e-08
ENSG00000108465	7719.21	-0.205317	0.0336438	-6.10268	1.04308e-09	2.19336e-08
ENSG00000069493	103.879	-1.13273	0.185663	-6.10099	1.05413e-09	2.213e-08
ENSG00000189114	621.528	-0.449333	0.0736479	-6.1011	1.05344e-09	2.213e-08
ENSG00000143919	253.049	-0.75129	0.123192	-6.09854	1.07042e-09	2.24544e-08
ENSG00000225234	43.3643	-1.63752	0.268566	-6.09725	1.0791e-09	2.26185e-08
ENSG00000166482	35.056	1.48568	0.243685	6.09674	1.08251e-09	2.26721e-08
ENSG00000185532	47.6758	-1.39765	0.22932	-6.09478	1.09589e-09	2.29343e-08
ENSG00000119042	412.05	-0.562	0.0922474	-6.09232	1.11289e-09	2.32718e-08
ENSG00000163590	1442.96	-0.901661	0.148061	-6.08979	1.13058e-09	2.36232e-08
ENSG00000265241	3911.13	-0.340126	0.055894	-6.08519	1.16352e-09	2.42922e-08
ENSG00000132356	3778.33	-0.455358	0.0749336	-6.07682	1.22588e-09	2.55742e-08
ENSG00000137575	1975.99	-0.393331	0.064749	-6.0747	1.24217e-09	2.58937e-08
ENSG00000134215	5421.63	-0.503852	0.0829919	-6.0711	1.2704e-09	2.64613e-08
ENSG00000163694	1821.36	-0.411859	0.067848	-6.07032	1.27659e-09	2.65694e-08
ENSG00000130558	991.498	-0.591505	0.0975085	-6.06619	1.30979e-09	2.72179e-08
ENSG00000088367	2102.71	0.360248	0.0593857	6.06624	1.30942e-09	2.72179e-08
ENSG00000261824	398.92	-0.89637	0.147883	-6.06135	1.34982e-09	2.80277e-08
ENSG00000254811	354.939	0.631176	0.104143	6.06066	1.35563e-09	2.81263e-08
ENSG00000053254	936.611	-0.358123	0.0591035	-6.05925	1.36754e-09	2.83513e-08
ENSG00000179057	117.189	0.93133	0.153749	6.05749	1.38266e-09	2.86424e-08
ENSG00000179299	809.402	-0.55705	0.0919647	-6.05722	1.38495e-09	2.86676e-08
ENSG00000280003	18.7531	2.47701	0.409031	6.05579	1.39728e-09	2.89003e-08
ENSG00000197102	28264.9	-0.338894	0.0559643	-6.05555	1.3994e-09	2.89216e-08
ENSG00000180611	760.206	0.364385	0.0601806	6.05485	1.40549e-09	2.90249e-08
ENSG00000251441	13.2005	4.09402	0.676578	6.05107	1.43886e-09	2.9691e-08
ENSG00000239503	13.6214	4.40325	0.727715	6.0508	1.44133e-09	2.97189e-08
ENSG00000213901	201.864	0.667748	0.110394	6.04877	1.45956e-09	3.00715e-08
ENSG00000273486	53.4146	-1.46654	0.242471	-6.04829	1.46388e-09	3.0137e-08
ENSG00000091536	170.273	0.862749	0.142682	6.04664	1.47893e-09	3.04235e-08
ENSG00000235859	128.458	-1.01782	0.168335	-6.0464	1.48119e-09	3.04463e-08
ENSG00000165863	91.0247	0.93806	0.155167	6.04551	1.48939e-09	3.05913e-08
ENSG00000204217	2491.48	-0.82223	0.136023	-6.04478	1.49614e-09	3.07062e-08
ENSG00000197308	3127.08	0.232239	0.0384374	6.04201	1.52203e-09	3.12134e-08
ENSG00000102910	2991.76	-0.228696	0.0378518	-6.04188	1.52325e-09	3.12144e-08
ENSG00000280378	80.1854	1.15684	0.191512	6.04056	1.53581e-09	3.14448e-08
ENSG00000167676	750.992	1.38492	0.229274	6.04045	1.53686e-09	3.14448e-08
ENSG00000110400	5587.5	0.323874	0.0536657	6.03502	1.58944e-09	3.24956e-08
ENSG00000272508	24.0907	1.94557	0.322592	6.03107	1.62876e-09	3.32739e-08
ENSG00000160678	346.24	0.789102	0.130845	6.03082	1.6313e-09	3.33001e-08
ENSG00000167895	203.508	0.751533	0.124752	6.02422	1.69931e-09	3.46617e-08
ENSG00000267414	62.0622	1.04961	0.174326	6.02095	1.73394e-09	3.53409e-08
ENSG00000134884	2859.2	-0.422488	0.070208	-6.01766	1.76954e-09	3.6039e-08
ENSG00000101194	12.8073	3.6144	0.600812	6.01586	1.78939e-09	3.64154e-08
ENSG00000114302	4220.14	-0.242287	0.0402782	-6.01535	1.79496e-09	3.65008e-08
ENSG00000119640	474.352	-0.540684	0.0898868	-6.01517	1.79698e-09	3.65139e-08
ENSG00000129911	760.271	0.383673	0.0637971	6.01396	1.81042e-09	3.67589e-08
ENSG00000104941	20.2067	2.7359	0.454969	6.01337	1.81711e-09	3.68666e-08
ENSG00000228549	22.0843	2.58438	0.42986	6.01215	1.83082e-09	3.71163e-08
ENSG00000180787	815.611	0.355992	0.0592678	6.00651	1.89563e-09	3.8401e-08
ENSG00000093009	945.461	-0.335967	0.055955	-6.00424	1.9223e-09	3.89115e-08
ENSG00000169604	489.062	-0.769298	0.128237	-5.99905	1.98478e-09	4.01457e-08
ENSG00000148843	2421.31	-0.318414	0.0530898	-5.99764	2.00208e-09	4.04648e-08
ENSG00000143119	14.2658	2.78229	0.464294	5.99252	2.06615e-09	4.17281e-08
ENSG00000186377	381.514	0.58815	0.0982124	5.98855	2.11717e-09	4.2726e-08
ENSG00000134602	940.738	-0.439421	0.0734217	-5.98489	2.16532e-09	4.36645e-08
ENSG00000234684	395.036	0.524696	0.0876729	5.9847	2.16785e-09	4.36824e-08
ENSG00000167741	2380.89	0.339998	0.0568152	5.98428	2.17355e-09	4.37641e-08
ENSG00000170100	3430.39	-0.287399	0.0480366	-5.98292	2.19174e-09	4.4097e-08
ENSG00000175482	1002.38	0.456882	0.0763671	5.9827	2.19466e-09	4.41222e-08
ENSG00000225756	19.3225	2.28087	0.381339	5.9812	2.21495e-09	4.44965e-08
ENSG00000134258	3784.24	-0.564075	0.0943305	-5.97977	2.23446e-09	4.48208e-08
ENSG00000198807	443.917	0.546851	0.0914496	5.97981	2.23403e-09	4.48208e-08
ENSG00000226383	223.352	-0.793662	0.132739	-5.97911	2.24361e-09	4.49704e-08
ENSG00000215068	164.436	0.702457	0.11755	5.97579	2.28974e-09	4.58603e-08
ENSG00000078401	15189.4	-0.30015	0.0502365	-5.97473	2.30468e-09	4.60901e-08
ENSG00000104824	6651.72	-0.391029	0.0654463	-5.97481	2.30358e-09	4.60901e-08
ENSG00000262884	111.642	0.848173	0.142073	5.96999	2.37272e-09	4.74152e-08
ENSG00000152137	1639.89	-0.527411	0.0884029	-5.966	2.43148e-09	4.85528e-08
ENSG00000178662	35.0757	-1.48995	0.249869	-5.96294	2.47746e-09	4.94338e-08
ENSG00000087253	166.284	-0.771895	0.129513	-5.95997	2.52282e-09	5.03013e-08
ENSG00000143365	673.066	0.375193	0.0629777	5.95755	2.56043e-09	5.09747e-08
ENSG00000272899	57.8629	1.33765	0.224526	5.95767	2.55856e-09	5.09747e-08
ENSG00000122786	347.47	-0.995539	0.167124	-5.95689	2.57085e-09	5.11438e-08
ENSG00000261553	37.8259	1.47676	0.247958	5.9557	2.58959e-09	5.14781e-08
ENSG00000004975	2295.68	-0.43853	0.0736453	-5.95462	2.60669e-09	5.17793e-08
ENSG00000163431	88.7365	0.984455	0.165381	5.95263	2.63867e-09	5.22583e-08
ENSG00000204396	78.3133	1.59988	0.268757	5.9529	2.63425e-09	5.22583e-08
ENSG00000146072	1815.74	0.282195	0.0474054	5.95281	2.63575e-09	5.22583e-08
ENSG00000073605	1812.74	0.590274	0.0991619	5.95263	2.63864e-09	5.22583e-08
ENSG00000166432	657.871	-0.524248	0.0880864	-5.95152	2.65659e-09	5.25741e-08
ENSG00000280187	374.089	0.561327	0.0943771	5.9477	2.71931e-09	5.37752e-08
ENSG00000261884	131.134	0.800461	0.134597	5.94709	2.72947e-09	5.3936e-08
ENSG00000232987	60.733	1.73175	0.291263	5.94566	2.75351e-09	5.43705e-08
ENSG00000103148	2601.6	-0.32227	0.0542038	-5.94553	2.75559e-09	5.43713e-08
ENSG00000114999	965.636	-0.408715	0.0687493	-5.94501	2.76446e-09	5.45057e-08
ENSG00000138190	1309.52	-0.381118	0.0641717	-5.93904	2.867e-09	5.64856e-08
ENSG00000197386	6611.04	-0.409125	0.0689284	-5.93551	2.92931e-09	5.76445e-08
ENSG00000092439	2650.31	-0.390734	0.0658317	-5.93534	2.93232e-09	5.76445e-08
ENSG00000037042	3094.48	-0.233931	0.0394128	-5.93542	2.93099e-09	5.76445e-08
ENSG00000075391	1915.1	-0.28077	0.0473209	-5.93332	2.96871e-09	5.83165e-08
ENSG00000152766	995.243	0.62309	0.105041	5.93188	2.99494e-09	5.87884e-08
ENSG00000065809	3614.45	-0.492905	0.0831156	-5.93036	3.02265e-09	5.92886e-08
ENSG00000205090	38.4435	1.50272	0.253491	5.92811	3.06448e-09	6.00648e-08
ENSG00000272791	75.3995	0.984174	0.166048	5.92703	3.08459e-09	6.04143e-08
ENSG00000259673	291.323	-0.638315	0.10772	-5.92571	3.10944e-09	6.08562e-08
ENSG00000118322	147.078	-0.786744	0.132792	-5.92463	3.13004e-09	6.11694e-08
ENSG00000274750	575.041	0.414657	0.0699878	5.9247	3.12863e-09	6.11694e-08
ENSG00000139410	655.878	0.465253	0.0785961	5.91954	3.22843e-09	6.30457e-08
ENSG00000267293	26.6278	2.24747	0.379698	5.91909	3.23721e-09	6.31708e-08
ENSG00000164144	1418.77	-0.532375	0.0899536	-5.91834	3.25216e-09	6.34159e-08
ENSG00000182606	2182.37	-0.350884	0.0592965	-5.91744	3.26982e-09	6.37135e-08
ENSG00000197748	93.7471	-0.878169	0.14841	-5.91719	3.27481e-09	6.37641e-08
ENSG00000168907	1267.47	0.367767	0.0621773	5.91481	3.32257e-09	6.46267e-08
ENSG00000166582	43.4747	-1.33382	0.225508	-5.91474	3.32398e-09	6.46267e-08
ENSG00000186510	23.18	1.97008	0.333269	5.9114	3.39215e-09	6.59039e-08
ENSG00000064655	285.773	-0.746451	0.126326	-5.90893	3.44343e-09	6.68513e-08
ENSG00000186654	434.808	0.805516	0.13634	5.90813	3.46018e-09	6.71275e-08
ENSG00000118454	1000.98	-0.368331	0.0623854	-5.90412	3.54531e-09	6.87289e-08
ENSG00000107290	5624.24	-0.230912	0.0391118	-5.90388	3.5504e-09	6.87774e-08
ENSG00000165186	27.1461	-1.6534	0.280076	-5.90341	3.56071e-09	6.89269e-08
ENSG00000156239	552.739	0.465902	0.0789227	5.90327	3.56369e-09	6.89342e-08
ENSG00000153037	489.443	-0.470308	0.0796791	-5.90253	3.57978e-09	6.91951e-08
ENSG00000019485	719.033	0.399823	0.0677643	5.9002	3.63051e-09	7.01248e-08
ENSG00000114378	266.716	0.575281	0.097532	5.89839	3.67076e-09	7.08507e-08
ENSG00000137941	625.946	-0.446059	0.0756721	-5.89464	3.75504e-09	7.23723e-08
ENSG00000133624	695.375	-0.370139	0.0627921	-5.89467	3.75425e-09	7.23723e-08
ENSG00000249715	308.874	0.599541	0.101717	5.89423	3.76439e-09	7.25e-08
ENSG00000271013	242.457	-0.754503	0.12801	-5.8941	3.76733e-09	7.2504e-08
ENSG00000277938	57.5797	1.1083	0.188073	5.89292	3.79421e-09	7.29686e-08
ENSG00000270061	47.7137	1.3966	0.237113	5.89001	3.86166e-09	7.42121e-08
ENSG00000101654	2231.12	-0.326138	0.0553878	-5.88826	3.90293e-09	7.49509e-08
ENSG00000227477	66.9661	1.01499	0.172481	5.88467	3.98854e-09	7.65397e-08
ENSG00000257842	70.5917	-1.09384	0.185892	-5.88429	3.99777e-09	7.66614e-08
ENSG00000224271	119.145	0.752224	0.127854	5.88348	4.01738e-09	7.69819e-08
ENSG00000250508	235.374	0.840109	0.142813	5.88258	4.0391e-09	7.73423e-08
ENSG00000184611	40.2284	-1.48703	0.252885	-5.88028	4.09567e-09	7.83691e-08
ENSG00000168264	2834.36	-0.441296	0.0750577	-5.87942	4.11695e-09	7.87196e-08
ENSG00000245958	456.725	-0.509821	0.0867333	-5.87803	4.15166e-09	7.93262e-08
ENSG00000159200	7698.64	-0.503202	0.085625	-5.87681	4.18241e-09	7.98565e-08
ENSG00000163104	1547.89	-0.340198	0.0579089	-5.8747	4.23606e-09	8.08227e-08
ENSG00000244480	31.0639	-1.7123	0.291579	-5.87252	4.29225e-09	8.18359e-08
ENSG00000229814	16.2447	6.02975	1.02685	5.87211	4.30278e-09	8.19779e-08
ENSG00000174738	1370.05	-0.397162	0.0676606	-5.86991	4.36027e-09	8.30139e-08
ENSG00000158258	1173.83	-0.313017	0.0533279	-5.86967	4.36671e-09	8.30769e-08
ENSG00000133019	130.816	-0.783808	0.133577	-5.86785	4.41474e-09	8.39275e-08
ENSG00000164292	1649.42	-0.338438	0.0576778	-5.86774	4.41773e-09	8.39275e-08
ENSG00000283020	54.3078	1.24191	0.211684	5.86683	4.44197e-09	8.43276e-08
ENSG00000112624	1416.89	-0.38403	0.0654775	-5.86507	4.48955e-09	8.51701e-08
ENSG00000243232	81.149	0.904334	0.154394	5.85733	4.70363e-09	8.91677e-08
ENSG00000232593	1181.6	-0.553235	0.0945068	-5.85392	4.80112e-09	9.0951e-08
ENSG00000139350	1791.89	-0.326137	0.0557374	-5.85132	4.87688e-09	9.23204e-08
ENSG00000137845	5059.45	-0.291008	0.0497456	-5.84993	4.9178e-09	9.30286e-08
ENSG00000171435	205.637	-0.677915	0.115897	-5.8493	4.93633e-09	9.32682e-08
ENSG00000166473	351.673	0.5258	0.0898916	5.84927	4.93748e-09	9.32682e-08
ENSG00000109911	864.018	-0.418414	0.071608	-5.84312	5.12324e-09	9.67085e-08
ENSG00000170482	137.027	0.770508	0.131936	5.84001	5.21986e-09	9.84623e-08
ENSG00000132623	844.203	-0.389519	0.0667052	-5.8394	5.23885e-09	9.87504e-08
ENSG00000163683	2767.63	-0.732409	0.125468	-5.83739	5.30237e-09	9.98769e-08
ENSG00000239415	63.8163	-1.03728	0.177771	-5.8349	5.38221e-09	1.01309e-07
ENSG00000198569	815.681	1.61146	0.276184	5.83472	5.38797e-09	1.01346e-07
ENSG00000188177	467.118	-0.639015	0.10955	-5.83307	5.44168e-09	1.02284e-07
ENSG00000166888	6083.15	-0.308486	0.0529401	-5.82707	5.6409e-09	1.05953e-07
ENSG00000279095	206.626	0.732119	0.125712	5.82378	5.75313e-09	1.07985e-07
ENSG00000134398	11.8747	4.21638	0.72414	5.82261	5.79371e-09	1.0867e-07
ENSG00000225912	19.2692	5.25301	0.902395	5.82119	5.84286e-09	1.09514e-07
ENSG00000135749	1092.28	-0.405865	0.0697509	-5.81878	5.92787e-09	1.1103e-07
ENSG00000136710	891.051	-0.329862	0.0567154	-5.81609	6.02404e-09	1.12751e-07
ENSG00000186481	993.396	-0.422641	0.0726942	-5.81396	6.10115e-09	1.14114e-07
ENSG00000096093	3183.53	-0.532945	0.0916709	-5.81367	6.11163e-09	1.1423e-07
ENSG00000260917	201.446	-0.722431	0.124293	-5.8123	6.16187e-09	1.15088e-07
ENSG00000280109	46.9174	1.51307	0.260381	5.81099	6.21034e-09	1.15912e-07
ENSG00000225805	25.0616	-1.92334	0.330994	-5.81081	6.21714e-09	1.15957e-07
ENSG00000176919	179.416	0.833193	0.143445	5.80843	6.30603e-09	1.17533e-07
ENSG00000106610	1251.44	-0.288244	0.0496273	-5.80818	6.31572e-09	1.17631e-07
ENSG00000133392	300.414	0.969127	0.16715	5.79794	6.7135e-09	1.24952e-07
ENSG00000214558	26.4949	2.00917	0.346541	5.79779	6.71933e-09	1.24973e-07
ENSG00000167771	293.679	1.13527	0.195897	5.79524	6.82239e-09	1.26801e-07
ENSG00000233198	627.15	1.6322	0.281681	5.79449	6.85276e-09	1.27277e-07
ENSG00000127191	1169.42	-0.498588	0.0860493	-5.79421	6.86438e-09	1.27403e-07
ENSG00000272398	42501.5	-0.368193	0.063558	-5.79302	6.91306e-09	1.28217e-07
ENSG00000140043	795.802	-0.465655	0.0803902	-5.79243	6.93748e-09	1.2858e-07
ENSG00000236581	17.8815	2.44623	0.422424	5.79093	6.99962e-09	1.29642e-07
ENSG00000154654	8389.22	-0.665171	0.114891	-5.78956	7.05701e-09	1.30614e-07
ENSG00000065054	3092.83	0.336395	0.0581069	5.78924	7.07051e-09	1.30772e-07
ENSG00000182257	44.0608	1.2929	0.22339	5.78765	7.13769e-09	1.31923e-07
ENSG00000169330	61.1709	-1.17754	0.203557	-5.78481	7.2594e-09	1.34079e-07
ENSG00000260394	16.4647	2.91179	0.503586	5.78211	7.37716e-09	1.3616e-07
ENSG00000135424	362.973	0.73587	0.127288	5.78116	7.41874e-09	1.36832e-07
ENSG00000128242	16.117	2.41549	0.417882	5.78031	7.45617e-09	1.37427e-07
ENSG00000198680	352.988	0.5213	0.0901893	5.78007	7.46711e-09	1.37533e-07
ENSG00000131781	463.134	-0.442637	0.0766074	-5.778	7.55934e-09	1.39136e-07
ENSG00000189051	127.039	0.968889	0.167696	5.77765	7.57519e-09	1.39331e-07
ENSG00000117597	1330.24	-0.435848	0.0754705	-5.77508	7.69185e-09	1.41281e-07
ENSG00000085377	1696.54	-0.403016	0.0697843	-5.77516	7.68793e-09	1.41281e-07
ENSG00000164818	2717.77	-0.393777	0.0681938	-5.77438	7.72388e-09	1.41772e-07
ENSG00000173992	1859.38	-0.277399	0.0480517	-5.77292	7.79079e-09	1.42901e-07
ENSG00000116285	2028.43	0.325646	0.0564154	5.77229	7.82037e-09	1.43345e-07
ENSG00000224914	338.5	-0.486314	0.0842643	-5.77129	7.86668e-09	1.44094e-07
ENSG00000168852	16.9499	-2.78967	0.483393	-5.77101	7.87968e-09	1.44233e-07
ENSG00000130477	253.514	-0.646962	0.112132	-5.76963	7.94465e-09	1.45322e-07
ENSG00000180257	660.748	0.42685	0.0739897	5.76905	7.9719e-09	1.4572e-07
ENSG00000177628	6461.92	0.241409	0.0418513	5.76825	8.00973e-09	1.46311e-07
ENSG00000101198	33.2913	1.687	0.292591	5.76572	8.13109e-09	1.48426e-07
ENSG00000204172	1122.4	-0.324573	0.0562995	-5.76512	8.15989e-09	1.48849e-07
ENSG00000263874	273.397	0.807365	0.140051	5.7648	8.17529e-09	1.49028e-07
ENSG00000275223	449.518	1.20295	0.208719	5.76349	8.23942e-09	1.50094e-07
ENSG00000184787	5264.38	-0.401117	0.0696146	-5.76196	8.31426e-09	1.51354e-07
ENSG00000012171	585.461	0.655724	0.113864	5.75883	8.46973e-09	1.54078e-07
ENSG00000242866	46.5094	-1.44295	0.250691	-5.75587	8.61945e-09	1.56695e-07
ENSG00000159588	181.739	0.626201	0.108863	5.7522	8.80902e-09	1.60032e-07
ENSG00000273033	224.232	-1.08746	0.189134	-5.74966	8.94206e-09	1.62227e-07
ENSG00000271127	24.5352	2.2982	0.399704	5.74977	8.93671e-09	1.62227e-07
ENSG00000085721	3008.67	-0.275175	0.0478627	-5.74925	8.96417e-09	1.62517e-07
ENSG00000152443	1176.94	0.426706	0.0742408	5.74759	9.05232e-09	1.64003e-07
ENSG00000196267	325.226	-0.66408	0.115556	-5.74684	9.09251e-09	1.64619e-07
ENSG00000143369	140.054	0.719344	0.125212	5.74502	9.19087e-09	1.66199e-07
ENSG00000172367	67.1711	1.00579	0.175072	5.745	9.1923e-09	1.66199e-07
ENSG00000145390	5438.15	-0.222763	0.0387849	-5.74354	9.2716e-09	1.67519e-07
ENSG00000182903	1941.76	0.332052	0.0578189	5.74296	9.30339e-09	1.67979e-07
ENSG00000070961	3133.41	-0.429968	0.0748702	-5.74284	9.31024e-09	1.67989e-07
ENSG00000232926	42.4525	1.63907	0.285424	5.7426	9.32344e-09	1.68113e-07
ENSG00000259416	128.22	1.31414	0.228918	5.74066	9.43072e-09	1.69932e-07
ENSG00000103047	286.111	-0.554452	0.0966135	-5.73887	9.53108e-09	1.71624e-07
ENSG00000278997	37.898	1.70738	0.297525	5.73862	9.54531e-09	1.71764e-07
ENSG00000230054	27.5338	1.7695	0.308585	5.73423	9.79569e-09	1.7615e-07
ENSG00000008294	3444.93	-0.342854	0.0597922	-5.73409	9.80397e-09	1.7618e-07
ENSG00000089692	61.0041	1.48987	0.259881	5.73291	9.87205e-09	1.77283e-07
ENSG00000100284	1066.89	-0.299148	0.0522141	-5.72925	1.00877e-08	1.81034e-07
ENSG00000153982	122.809	-0.75526	0.131831	-5.72899	1.01033e-08	1.81191e-07
ENSG00000168010	1414.12	-0.686417	0.119823	-5.72858	1.01276e-08	1.81505e-07
ENSG00000085719	8152.87	-0.327756	0.0572274	-5.72727	1.0206e-08	1.82786e-07
ENSG00000279720	289.799	0.573162	0.100095	5.7262	1.02706e-08	1.8382e-07
ENSG00000231793	34.2527	1.74345	0.304598	5.72378	1.04178e-08	1.86329e-07
ENSG00000143842	9396.26	-0.249472	0.0435923	-5.72284	1.04756e-08	1.87237e-07
ENSG00000162980	388.34	-0.7079	0.123894	-5.71373	1.10523e-08	1.97411e-07
ENSG00000069275	24487.9	-0.42844	0.0749987	-5.71264	1.11239e-08	1.98557e-07
ENSG00000008441	1438.55	0.428893	0.075108	5.71035	1.12744e-08	2.01107e-07
ENSG00000196405	1753.66	0.508827	0.0891471	5.70773	1.14496e-08	2.04097e-07
ENSG00000212901	84.2627	-1.33948	0.234725	-5.70659	1.15265e-08	2.0533e-07
ENSG00000267309	139.639	0.758859	0.132989	5.70618	1.15543e-08	2.05686e-07
ENSG00000246596	103.717	-0.88428	0.154992	-5.70534	1.16112e-08	2.06562e-07
ENSG00000269720	147.401	1.22726	0.215133	5.70464	1.16588e-08	2.0727e-07
ENSG00000141376	759.399	-0.374054	0.0656064	-5.70149	1.18765e-08	2.10998e-07
ENSG00000183049	553.453	0.419298	0.0735589	5.70017	1.19686e-08	2.12492e-07
ENSG00000111203	809.542	-0.356188	0.0625135	-5.69778	1.21377e-08	2.15351e-07
ENSG00000176273	649.6	-0.456365	0.0801997	-5.69036	1.26772e-08	2.24772e-07
ENSG00000187535	3293.8	-0.459912	0.0808374	-5.68935	1.27526e-08	2.2596e-07
ENSG00000213590	19.8665	2.04717	0.360105	5.68494	1.30862e-08	2.31716e-07
ENSG00000253159	96.6805	1.14929	0.202204	5.68381	1.31728e-08	2.33093e-07
ENSG00000204420	104.924	0.984611	0.173283	5.68209	1.33062e-08	2.35298e-07
ENSG00000100739	12.1368	-3.49184	0.614659	-5.68095	1.33951e-08	2.36713e-07
ENSG00000250397	317.882	1.25775	0.221428	5.6802	1.34539e-08	2.37593e-07
ENSG00000256673	141.726	0.700401	0.123316	5.67971	1.3492e-08	2.38108e-07
ENSG00000185885	815.18	0.444648	0.0783101	5.67804	1.36246e-08	2.40288e-07
ENSG00000125246	82.2903	-1.24455	0.219209	-5.67746	1.36711e-08	2.40948e-07
ENSG00000141293	308.046	-0.859417	0.151389	-5.67688	1.37174e-08	2.41604e-07
ENSG00000257176	29.4097	-1.73301	0.305453	-5.67358	1.39844e-08	2.46144e-07
ENSG00000167772	2725.02	-0.422775	0.0745192	-5.67337	1.40019e-08	2.46288e-07
ENSG00000136527	10150.6	0.307524	0.0542105	5.67277	1.40504e-08	2.46978e-07
ENSG00000129646	341.103	0.832253	0.146722	5.67232	1.40875e-08	2.47467e-07
ENSG00000180730	475.682	-1.06034	0.186993	-5.6705	1.42379e-08	2.49868e-07
ENSG00000226450	54.2089	1.41436	0.249427	5.67044	1.4243e-08	2.49868e-07
ENSG00000181061	1429.61	-0.435624	0.0768411	-5.66916	1.43501e-08	2.51582e-07
ENSG00000165121	85.2824	0.904526	0.159597	5.66757	1.44837e-08	2.53756e-07
ENSG00000267666	59.1922	1.13137	0.199728	5.66454	1.47417e-08	2.58106e-07
ENSG00000119698	1640.01	-0.453148	0.0800357	-5.66182	1.49774e-08	2.6206e-07
ENSG00000116176	25.1069	1.69392	0.29919	5.66168	1.49897e-08	2.62103e-07
ENSG00000186517	258.707	0.503775	0.089034	5.65823	1.52943e-08	2.67254e-07
ENSG00000162368	1793.91	-0.516409	0.0913149	-5.65526	1.55613e-08	2.7174e-07
ENSG00000180929	16.7261	2.65179	0.468957	5.65466	1.56156e-08	2.72509e-07
ENSG00000083750	903.899	-0.314622	0.0556639	-5.65218	1.58426e-08	2.76288e-07
ENSG00000265479	51.9347	1.37531	0.243329	5.65204	1.58554e-08	2.76331e-07
ENSG00000174282	5434.43	0.235352	0.0416486	5.65089	1.59623e-08	2.78012e-07
ENSG00000200209	20.3302	1.96339	0.347471	5.65053	1.59955e-08	2.78407e-07
ENSG00000111261	1784.58	0.305347	0.0540514	5.6492	1.612e-08	2.80391e-07
ENSG00000105127	1223.93	-0.328635	0.058253	-5.64151	1.68566e-08	2.93011e-07
ENSG00000229127	21.7552	-1.95864	0.347313	-5.63939	1.7065e-08	2.96439e-07
ENSG00000206417	90.4663	0.848803	0.150579	5.63693	1.73111e-08	3.00519e-07
ENSG00000177200	1403.07	-0.469124	0.0832314	-5.63638	1.73665e-08	3.01285e-07
ENSG00000105792	177.095	-0.891383	0.158189	-5.63494	1.75123e-08	3.03616e-07
ENSG00000124391	18.253	2.20661	0.391629	5.63445	1.75621e-08	3.04281e-07
ENSG00000248449	78.0859	1.17097	0.207985	5.63009	1.80111e-08	3.11653e-07
ENSG00000257698	117.465	-0.951686	0.169033	-5.63019	1.80006e-08	3.11653e-07
ENSG00000133812	803.415	-0.4092	0.0726848	-5.62979	1.80432e-08	3.12005e-07
ENSG00000145439	662.183	-0.478717	0.0850497	-5.62868	1.81597e-08	3.13816e-07
ENSG00000133597	1484.36	0.270936	0.0481383	5.62829	1.82007e-08	3.14319e-07
ENSG00000235052	343.262	0.480731	0.0854228	5.62766	1.8267e-08	3.1526e-07
ENSG00000261136	220.21	0.635391	0.112915	5.62715	1.83209e-08	3.15985e-07
ENSG00000137574	995.181	-0.456925	0.0812372	-5.62458	1.85961e-08	3.20523e-07
ENSG00000226562	47.9642	-1.54439	0.274594	-5.62426	1.86303e-08	3.20904e-07
ENSG00000174501	249.609	-0.807598	0.143626	-5.62292	1.87753e-08	3.23193e-07
ENSG00000020577	6438.87	-0.364506	0.0648326	-5.62226	1.88472e-08	3.2422e-07
ENSG00000168806	909.223	0.356305	0.0633987	5.62006	1.90886e-08	3.28161e-07
ENSG00000162723	32.9004	1.41332	0.251526	5.61898	1.92083e-08	3.30006e-07
ENSG00000105287	2154.76	0.324824	0.0578255	5.61732	1.93945e-08	3.3299e-07
ENSG00000240583	142.935	0.816274	0.14536	5.61555	1.9594e-08	3.3598e-07
ENSG00000230359	69.2157	0.936855	0.166832	5.61555	1.9594e-08	3.3598e-07
ENSG00000165802	2109.77	0.576226	0.102647	5.61366	1.98087e-08	3.39442e-07
ENSG00000083520	1869.99	-0.436841	0.0778772	-5.60935	2.03087e-08	3.47786e-07
ENSG00000161243	239.381	0.510327	0.0910642	5.60404	2.09417e-08	3.58395e-07
ENSG00000049089	1284.7	0.272332	0.0485972	5.60386	2.09626e-08	3.58522e-07
ENSG00000187735	4880.38	-0.291688	0.0520544	-5.60353	2.10035e-08	3.58991e-07
ENSG00000180891	4183	-0.280757	0.0501183	-5.6019	2.12015e-08	3.62143e-07
ENSG00000143110	23.0173	-1.85897	0.332016	-5.59905	2.15524e-08	3.67899e-07
ENSG00000176387	289.722	-0.500995	0.0895866	-5.5923	2.24081e-08	3.82261e-07
ENSG00000165406	2917.59	0.296072	0.0529982	5.58644	2.31768e-08	3.95121e-07
ENSG00000187185	42.0504	1.3994	0.250541	5.5855	2.33028e-08	3.97014e-07
ENSG00000082196	32.5676	-1.45841	0.261156	-5.58446	2.34432e-08	3.99151e-07
ENSG00000265766	17.3105	-2.39423	0.428815	-5.58337	2.35904e-08	4.014e-07
ENSG00000134283	3529.61	0.313401	0.0561456	5.58193	2.37863e-08	4.04474e-07
ENSG00000023572	615.283	0.473728	0.0849217	5.57841	2.42725e-08	4.12477e-07
ENSG00000113240	1377.29	-0.402383	0.0721494	-5.57708	2.4459e-08	4.15381e-07
ENSG00000167100	30.8692	1.49628	0.268322	5.57642	2.45514e-08	4.16685e-07
ENSG00000012822	4956.53	-0.345371	0.0619411	-5.57579	2.46403e-08	4.17926e-07
ENSG00000168273	428.838	0.5717	0.102564	5.57411	2.48801e-08	4.21724e-07
ENSG00000273009	97.7877	-1.05348	0.189032	-5.57302	2.50365e-08	4.24104e-07
ENSG00000196678	2524.53	0.289492	0.0519898	5.56824	2.57319e-08	4.35606e-07
ENSG00000235109	238.354	-0.579605	0.104119	-5.56677	2.59505e-08	4.39027e-07
ENSG00000162576	4383.53	0.437477	0.078599	5.56593	2.60752e-08	4.40856e-07
ENSG00000164219	1051.08	-0.480645	0.0863609	-5.56554	2.61339e-08	4.41567e-07
ENSG00000197296	1691.42	0.379769	0.0682393	5.56525	2.61779e-08	4.4203e-07
ENSG00000279415	24.5998	2.05986	0.370196	5.56424	2.63293e-08	4.44305e-07
ENSG00000162236	1939.76	-0.580809	0.104389	-5.5639	2.63808e-08	4.44891e-07
ENSG00000233621	208.923	0.65115	0.117036	5.56365	2.64193e-08	4.45258e-07
ENSG00000069974	568.147	-0.502733	0.0903629	-5.56348	2.6444e-08	4.45392e-07
ENSG00000205702	153.609	1.22642	0.220462	5.56295	2.65251e-08	4.46476e-07
ENSG00000171208	154.146	-0.745689	0.134072	-5.56184	2.66948e-08	4.49047e-07
ENSG00000225981	35.9372	2.021	0.36361	5.55816	2.72638e-08	4.58205e-07
ENSG00000048028	2634.3	-0.256164	0.0460885	-5.55809	2.72737e-08	4.58205e-07
ENSG00000085552	3162.52	0.501764	0.0902787	5.55794	2.72973e-08	4.58313e-07
ENSG00000133962	33.2671	-1.52686	0.274726	-5.55774	2.73285e-08	4.58546e-07
ENSG00000227008	99.1777	3.6193	0.651268	5.55731	2.73961e-08	4.59391e-07
ENSG00000161955	665.703	0.477903	0.0860428	5.55425	2.78814e-08	4.67233e-07
ENSG00000162819	3726.27	-0.478801	0.0862356	-5.55225	2.82018e-08	4.72033e-07
ENSG00000141577	821.459	-0.435731	0.0784785	-5.55224	2.82034e-08	4.72033e-07
ENSG00000110169	1471.14	0.664366	0.119665	5.5519	2.8258e-08	4.7265e-07
ENSG00000128573	106.145	-0.820467	0.14779	-5.55156	2.83136e-08	4.73283e-07
ENSG00000267002	1047.29	-0.330215	0.0594896	-5.5508	2.84363e-08	4.75034e-07
ENSG00000100422	1767.85	0.305825	0.0550978	5.55059	2.84702e-08	4.75302e-07
ENSG00000123636	741.681	-0.406542	0.0732849	-5.54742	2.89908e-08	4.83387e-07
ENSG00000126883	7338.96	-0.215303	0.0388107	-5.54751	2.89768e-08	4.83387e-07
ENSG00000166037	2786.88	-0.376542	0.0679147	-5.54433	2.95077e-08	4.91697e-07
ENSG00000068079	960.363	0.400127	0.0722106	5.54112	3.00544e-08	5.00492e-07
ENSG00000115616	2791.91	0.215274	0.0388541	5.54057	3.01493e-08	5.01758e-07
ENSG00000047621	403.97	-0.416799	0.0752405	-5.53956	3.03236e-08	5.04344e-07
ENSG00000227374	11.841	3.13467	0.56602	5.53808	3.05804e-08	5.07987e-07
ENSG00000103254	376.21	0.468964	0.0846799	5.53808	3.05809e-08	5.07987e-07
ENSG00000261442	31.6815	1.84185	0.332862	5.53339	3.141e-08	5.21434e-07
ENSG00000259802	87.8219	0.885241	0.160012	5.53233	3.16011e-08	5.24278e-07
ENSG00000159733	392.363	-0.744762	0.134849	-5.52292	3.3341e-08	5.52799e-07
ENSG00000261094	258.626	0.528889	0.0957652	5.52277	3.33696e-08	5.52928e-07
ENSG00000006747	347.488	-0.502554	0.0910047	-5.52228	3.34628e-08	5.54126e-07
ENSG00000248383	112.91	1.09058	0.197548	5.52056	3.37917e-08	5.59225e-07
ENSG00000238278	23.4134	-1.75609	0.318194	-5.51892	3.41083e-08	5.64113e-07
ENSG00000155666	285.719	0.693409	0.125732	5.515	3.48785e-08	5.76494e-07
ENSG00000117682	1651.33	-0.25388	0.0460581	-5.51218	3.54423e-08	5.85447e-07
ENSG00000131069	2624.44	-0.318608	0.0578211	-5.51024	3.58348e-08	5.91564e-07
ENSG00000023839	43.5814	-1.32954	0.241319	-5.50948	3.59886e-08	5.93734e-07
ENSG00000170017	10050.8	-0.383539	0.0696244	-5.50868	3.61526e-08	5.95699e-07
ENSG00000178803	111.704	1.09961	0.199614	5.50869	3.61515e-08	5.95699e-07
ENSG00000261051	22.8822	-1.85945	0.337642	-5.50715	3.64692e-08	6.00544e-07
ENSG00000167770	5450.01	-0.29321	0.0532503	-5.50625	3.66552e-08	6.03233e-07
ENSG00000163344	2210.68	0.38906	0.0706595	5.50613	3.6681e-08	6.03284e-07
ENSG00000214872	69.3034	1.66669	0.302764	5.50493	3.69322e-08	6.0704e-07
ENSG00000169217	4814.1	0.179411	0.0326043	5.50268	3.74063e-08	6.14453e-07
ENSG00000171320	1027.66	-0.485247	0.0882073	-5.50121	3.77197e-08	6.19219e-07
ENSG00000112983	6403.34	-0.244246	0.0444137	-5.49935	3.81186e-08	6.2538e-07
ENSG00000143622	1962.03	-0.273004	0.0496509	-5.49848	3.83089e-08	6.28115e-07
ENSG00000164638	264.759	-0.588469	0.107072	-5.496	3.885e-08	6.36593e-07
ENSG00000119285	3717.1	-0.228957	0.0416608	-5.49573	3.89103e-08	6.3719e-07
ENSG00000164742	300.141	-0.523114	0.0952355	-5.49285	3.95502e-08	6.47269e-07
ENSG00000227398	85.1678	-0.92448	0.168435	-5.48863	4.05063e-08	6.62509e-07
ENSG00000172869	2631.81	-0.575128	0.104795	-5.48813	4.06222e-08	6.63996e-07
ENSG00000214413	489.413	-0.409736	0.0746776	-5.48673	4.09443e-08	6.68849e-07
ENSG00000278916	96.4079	0.825694	0.150502	5.48626	4.10534e-08	6.70219e-07
ENSG00000162949	628.84	0.439607	0.0801385	5.48559	4.1209e-08	6.72037e-07
ENSG00000168078	1299.55	-0.303121	0.055258	-5.48556	4.12153e-08	6.72037e-07
ENSG00000166532	415.996	0.568934	0.103731	5.48471	4.14144e-08	6.7487e-07
ENSG00000108797	325.783	0.635683	0.115905	5.48454	4.1455e-08	6.75117e-07
ENSG00000151012	238.739	-0.809356	0.147574	-5.48441	4.14859e-08	6.75207e-07
ENSG00000120471	88.3754	0.958046	0.174694	5.48414	4.15475e-08	6.75795e-07
ENSG00000126602	3251.58	-0.254013	0.0463219	-5.48366	4.16617e-08	6.77239e-07
ENSG00000162994	199.398	-0.82531	0.150519	-5.48309	4.17959e-08	6.79005e-07
ENSG00000074603	2158.81	-0.42736	0.0779444	-5.48289	4.18433e-08	6.79359e-07
ENSG00000160233	125.602	-0.698091	0.127369	-5.48086	4.23253e-08	6.86765e-07
ENSG00000119685	2451.65	-0.411842	0.0751782	-5.47822	4.29637e-08	6.96699e-07
ENSG00000158201	442.29	-0.469408	0.0856927	-5.4778	4.3064e-08	6.97899e-07
ENSG00000168255	124.389	0.783512	0.143124	5.47434	4.39134e-08	7.11231e-07
ENSG00000158985	1634.12	-0.431612	0.0788635	-5.4729	4.42728e-08	7.16471e-07
ENSG00000176783	1975.59	-0.503149	0.0919359	-5.47283	4.42909e-08	7.16471e-07
ENSG00000146826	714.199	-0.381634	0.069734	-5.47271	4.43193e-08	7.16496e-07
ENSG00000205959	42.3291	-1.51607	0.277135	-5.4705	4.48756e-08	7.24694e-07
ENSG00000169258	460.38	-0.379989	0.0694617	-5.47048	4.4881e-08	7.24694e-07
ENSG00000215165	59.1535	1.26814	0.231932	5.46771	4.55875e-08	7.35601e-07
ENSG00000186047	57.153	-1.18969	0.217588	-5.46762	4.56118e-08	7.35601e-07
ENSG00000160284	390.195	-0.444723	0.0813435	-5.46722	4.57138e-08	7.36799e-07
ENSG00000230002	89.5708	1.13673	0.208149	5.46114	4.73078e-08	7.62029e-07
ENSG00000170477	1022.09	-0.513438	0.0940547	-5.45893	4.7902e-08	7.71132e-07
ENSG00000079691	752.654	-0.536082	0.0982364	-5.45706	4.8409e-08	7.78822e-07
ENSG00000151233	3126.15	-0.38197	0.0700037	-5.45643	4.85813e-08	7.81121e-07
ENSG00000152154	18.158	-1.94083	0.355803	-5.4548	4.90285e-08	7.87836e-07
ENSG00000236088	248.349	-0.7799	0.143	-5.45385	4.92902e-08	7.91561e-07
ENSG00000176463	347.417	-0.540098	0.0990486	-5.45286	4.95662e-08	7.95513e-07
ENSG00000188163	172.909	0.797482	0.146282	5.45168	4.98952e-08	8.0031e-07
ENSG00000131849	51.1952	-1.17633	0.215814	-5.45066	5.01844e-08	8.04464e-07
ENSG00000242516	20.8864	-2.15528	0.395505	-5.44943	5.05317e-08	8.09543e-07
ENSG00000101049	33.9311	-1.63029	0.299178	-5.44925	5.05814e-08	8.09851e-07
ENSG00000268516	215.399	0.590468	0.108382	5.44806	5.09235e-08	8.14837e-07
ENSG00000239653	123.9	0.782985	0.143724	5.44784	5.09857e-08	8.15342e-07
ENSG00000075089	1385.74	-0.280168	0.0514665	-5.44369	5.21891e-08	8.34084e-07
ENSG00000235651	26.4823	1.54407	0.283752	5.44161	5.28007e-08	8.43352e-07
ENSG00000164597	1253.98	-0.335382	0.0616491	-5.44017	5.32286e-08	8.49675e-07
ENSG00000020922	3331.72	-0.304729	0.0560272	-5.43895	5.35941e-08	8.54996e-07
ENSG00000095752	34.333	1.46829	0.27013	5.43549	5.4645e-08	8.71239e-07
ENSG00000063854	1761.77	0.412379	0.0759355	5.43064	5.6151e-08	8.94713e-07
ENSG00000085733	12787.2	-0.344744	0.0634867	-5.43018	5.62984e-08	8.96152e-07
ENSG00000055483	2490.5	-0.272052	0.0501003	-5.43014	5.63088e-08	8.96152e-07
ENSG00000198876	2124.02	-0.259361	0.047804	-5.42551	5.7788e-08	9.19143e-07
ENSG00000100842	561.587	0.444962	0.0820467	5.42327	5.85171e-08	9.30184e-07
ENSG00000117481	1123.12	-0.318314	0.0587099	-5.42181	5.89982e-08	9.3727e-07
ENSG00000152492	2724.06	-0.286902	0.0529252	-5.42089	5.93038e-08	9.41564e-07
ENSG00000142188	2855.86	-0.382557	0.0705823	-5.42001	5.9595e-08	9.45622e-07
ENSG00000152219	1000.57	-0.342897	0.0632818	-5.41857	6.00778e-08	9.52714e-07
ENSG00000171148	4137.64	0.363701	0.0671235	5.41839	6.01371e-08	9.53085e-07
ENSG00000265666	61.0469	1.80307	0.33319	5.41154	6.24839e-08	9.89688e-07
ENSG00000189241	4663.49	-0.2121	0.0391996	-5.41078	6.27511e-08	9.93328e-07
ENSG00000154122	488.373	0.968751	0.179057	5.41028	6.29255e-08	9.95496e-07
ENSG00000133121	1764.47	-0.35754	0.0661254	-5.40699	6.40918e-08	1.01334e-06
ENSG00000166813	620.731	0.648041	0.119882	5.40564	6.45792e-08	1.02044e-06
ENSG00000283288	11.4257	-3.60069	0.666136	-5.40533	6.46877e-08	1.02155e-06
ENSG00000169855	4960.42	-0.25805	0.0477481	-5.4044	6.50268e-08	1.0263e-06
ENSG00000150990	1743.14	-0.44737	0.0827806	-5.40428	6.50687e-08	1.02635e-06
ENSG00000119673	679.176	0.523786	0.0969294	5.40379	6.52468e-08	1.02855e-06
ENSG00000142856	597.457	-0.439015	0.0812744	-5.40165	6.60322e-08	1.04031e-06
ENSG00000266017	45.5609	1.3591	0.25165	5.40076	6.63595e-08	1.04485e-06
ENSG00000138119	18636.9	-0.238845	0.0442351	-5.39945	6.6845e-08	1.05187e-06
ENSG00000230666	44.0576	-1.66313	0.30823	-5.39574	6.8241e-08	1.0732e-06
ENSG00000108839	214.599	0.612566	0.113574	5.39354	6.9084e-08	1.08582e-06
ENSG00000197548	798.536	-0.389963	0.0723176	-5.39238	6.95325e-08	1.09222e-06
ENSG00000261587	24.5268	1.82206	0.337997	5.39075	7.01644e-08	1.10149e-06
ENSG00000053524	77.891	-0.876609	0.162788	-5.38498	7.24513e-08	1.13672e-06
ENSG00000095321	3712.76	0.26086	0.0484629	5.38267	7.33904e-08	1.15078e-06
ENSG00000089639	769.461	-0.326613	0.0606799	-5.38256	7.34348e-08	1.1508e-06
ENSG00000197472	232.262	0.680412	0.126425	5.38192	7.36946e-08	1.15419e-06
ENSG00000272077	28.3933	-1.8379	0.341794	-5.37721	7.56484e-08	1.18409e-06
ENSG00000039523	2578.99	0.412067	0.0766733	5.37432	7.68727e-08	1.20254e-06
ENSG00000169752	80.5908	-0.925005	0.172141	-5.37353	7.72093e-08	1.2071e-06
ENSG00000122367	62.7868	0.984273	0.183219	5.37212	7.78174e-08	1.21589e-06
ENSG00000279453	52.7892	-1.54227	0.287201	-5.37002	7.87294e-08	1.22942e-06
ENSG00000262873	13.6639	2.58472	0.481563	5.36735	7.99018e-08	1.24699e-06
ENSG00000142875	586.65	-0.564875	0.105324	-5.3632	8.17587e-08	1.27523e-06
ENSG00000174243	6793.86	-0.26967	0.0502905	-5.36224	8.21945e-08	1.28127e-06
ENSG00000255181	9.9687	4.30472	0.80326	5.35907	8.36533e-08	1.30325e-06
ENSG00000123154	499.652	0.497747	0.0929368	5.35576	8.51998e-08	1.32656e-06
ENSG00000249915	6446.57	-0.234016	0.0436963	-5.35551	8.53136e-08	1.32756e-06
ENSG00000121486	2042.26	-0.378331	0.0706619	-5.3541	8.59852e-08	1.33722e-06
ENSG00000269343	671.835	0.726921	0.135781	5.35364	8.62008e-08	1.33979e-06
ENSG00000152292	36.3037	1.33893	0.250182	5.35182	8.70756e-08	1.3526e-06
ENSG00000169410	1177.56	-0.357635	0.0668309	-5.35134	8.73042e-08	1.35536e-06
ENSG00000116266	851.954	-0.401219	0.0749933	-5.35007	8.79193e-08	1.36411e-06
ENSG00000156886	34.2266	1.35974	0.254163	5.34986	8.80206e-08	1.36488e-06
ENSG00000139263	2314.79	0.500232	0.0935246	5.34867	8.86026e-08	1.37311e-06
ENSG00000272579	86.7319	-1.11127	0.207897	-5.3453	9.02692e-08	1.39812e-06
ENSG00000188782	14.2456	2.29211	0.428944	5.34362	9.11092e-08	1.41031e-06
ENSG00000121089	166.734	4.78124	0.895072	5.34174	9.20566e-08	1.42414e-06
ENSG00000166803	354.237	-1.07604	0.201469	-5.341	9.24373e-08	1.42837e-06
ENSG00000266947	117.597	0.740124	0.138572	5.34109	9.23891e-08	1.42837e-06
ENSG00000064042	1499.07	-0.383978	0.0719289	-5.33829	9.38252e-08	1.44898e-06
ENSG00000175105	1604.89	0.454484	0.085248	5.33132	9.75036e-08	1.50491e-06
ENSG00000205464	310.253	-0.59658	0.111911	-5.33086	9.77487e-08	1.50781e-06
ENSG00000258593	58.9035	1.12725	0.211494	5.32995	9.82372e-08	1.51359e-06
ENSG00000246922	390.6	-0.763343	0.143216	-5.33	9.8211e-08	1.51359e-06
ENSG00000001461	6408.39	0.237677	0.0445969	5.32944	9.85157e-08	1.51701e-06
ENSG00000171813	795.724	0.44369	0.0833124	5.32562	1.00609e-07	1.54835e-06
ENSG00000091831	9279.4	-0.426527	0.0801149	-5.32394	1.01545e-07	1.56185e-06
ENSG00000085117	10631.4	0.197637	0.0371279	5.32315	1.01986e-07	1.56772e-06
ENSG00000100116	651.564	-0.450291	0.0845953	-5.32288	1.02136e-07	1.56911e-06
ENSG00000139173	69.3966	-0.908034	0.170722	-5.31879	1.04462e-07	1.60392e-06
ENSG00000283709	23.4076	-2.22163	0.417809	-5.31733	1.05302e-07	1.61589e-06
ENSG00000163608	1810.33	-0.281701	0.0529803	-5.31709	1.05443e-07	1.6171e-06
ENSG00000139508	2358.29	-0.265091	0.0498574	-5.31698	1.05502e-07	1.6171e-06
ENSG00000178665	122.52	-0.668401	0.125721	-5.31654	1.05758e-07	1.62007e-06
ENSG00000140009	44.965	1.20491	0.226731	5.31426	1.07093e-07	1.63959e-06
ENSG00000215301	13242	-0.340465	0.064077	-5.31338	1.07611e-07	1.64656e-06
ENSG00000112290	510.97	-0.542523	0.102111	-5.31306	1.07801e-07	1.64852e-06
ENSG00000278869	97.3716	0.788778	0.148491	5.31194	1.08462e-07	1.65768e-06
ENSG00000157077	1121.34	-0.366467	0.0690087	-5.31044	1.09359e-07	1.67043e-06
ENSG00000173467	842.179	-0.31528	0.0593907	-5.30858	1.10484e-07	1.68664e-06
ENSG00000177054	649.904	-0.348833	0.0657227	-5.30765	1.11047e-07	1.69427e-06
ENSG00000163873	3006.13	-0.354955	0.0668786	-5.30745	1.11167e-07	1.69512e-06
ENSG00000143379	2741.57	-0.21135	0.0398391	-5.30508	1.12623e-07	1.71633e-06
ENSG00000096070	4384.93	0.23456	0.0442165	5.3048	1.12797e-07	1.71801e-06
ENSG00000118162	605.936	0.549609	0.103608	5.30469	1.12864e-07	1.71804e-06
ENSG00000185010	86.4909	-0.870253	0.164085	-5.30367	1.13498e-07	1.7267e-06
ENSG00000198496	475.656	-0.445806	0.0842033	-5.2944	1.19409e-07	1.81559e-06
ENSG00000198825	411.509	-0.437569	0.0826684	-5.29307	1.2028e-07	1.82779e-06
ENSG00000173120	15570.8	-0.214871	0.0406057	-5.29166	1.2121e-07	1.84088e-06
ENSG00000198887	870.973	-0.364394	0.0688634	-5.29155	1.21285e-07	1.84095e-06
ENSG00000270441	80.0585	0.97246	0.183854	5.2893	1.22786e-07	1.86268e-06
ENSG00000150782	504.48	0.398403	0.0753712	5.28588	1.25103e-07	1.89674e-06
ENSG00000165821	831.031	0.387518	0.0733341	5.28428	1.262e-07	1.91229e-06
ENSG00000267374	59.6005	-1.05197	0.199165	-5.2819	1.27849e-07	1.93617e-06
ENSG00000166024	1348.56	0.282696	0.0535465	5.27945	1.29573e-07	1.96116e-06
ENSG00000188559	1150.21	-0.334073	0.0632943	-5.27809	1.30538e-07	1.97465e-06
ENSG00000184154	1866.62	0.298599	0.0565747	5.27796	1.30628e-07	1.97488e-06
ENSG00000112159	3043.89	-0.306804	0.0581424	-5.27677	1.31482e-07	1.98666e-06
ENSG00000151116	1067.57	-0.371328	0.0703785	-5.27616	1.31919e-07	1.99212e-06
ENSG00000242252	130.977	1.31347	0.249009	5.27478	1.32916e-07	2.00605e-06
ENSG00000172543	42.1937	1.75567	0.332855	5.27457	1.33067e-07	2.00718e-06
ENSG00000103021	643.43	-0.48746	0.0924216	-5.27431	1.33258e-07	2.00892e-06
ENSG00000270028	11.6127	-5.48968	1.04121	-5.2724	1.34654e-07	2.02882e-06
ENSG00000172915	561.002	-0.443946	0.0842519	-5.26927	1.36971e-07	2.06256e-06
ENSG00000178075	215.9	-0.580372	0.110191	-5.26697	1.38695e-07	2.08734e-06
ENSG00000072133	179.76	-0.653479	0.124081	-5.26655	1.3901e-07	2.09089e-06
ENSG00000063244	7412.12	0.211424	0.0401753	5.26255	1.42073e-07	2.13576e-06
ENSG00000197599	243.123	1.1555	0.219749	5.25825	1.45436e-07	2.18508e-06
ENSG00000229417	57.3739	-1.06229	0.202145	-5.25509	1.47951e-07	2.22034e-06
ENSG00000174306	2371.68	-0.249803	0.047535	-5.25514	1.47909e-07	2.22034e-06
ENSG00000120875	2537.28	-0.300834	0.057257	-5.25409	1.48756e-07	2.23118e-06
ENSG00000260022	75.4039	0.965127	0.183713	5.25345	1.49273e-07	2.23767e-06
ENSG00000173209	3821.53	-0.325034	0.0618831	-5.25238	1.50143e-07	2.24944e-06
ENSG00000272217	65.78	0.967562	0.184236	5.25174	1.50671e-07	2.25608e-06
ENSG00000196878	184.058	0.619971	0.118075	5.25065	1.51563e-07	2.26815e-06
ENSG00000134256	123.352	-0.738856	0.140834	-5.24631	1.55177e-07	2.32085e-06
ENSG00000271327	73.3221	1.15598	0.220346	5.24621	1.55259e-07	2.32085e-06
ENSG00000145087	130.468	-0.65039	0.124078	-5.24179	1.59024e-07	2.3758e-06
ENSG00000198841	152.517	0.648474	0.123747	5.24032	1.60295e-07	2.3921e-06
ENSG00000136490	119.908	0.880797	0.168079	5.24037	1.60253e-07	2.3921e-06
ENSG00000163029	1321.8	-0.481911	0.0920097	-5.23761	1.6267e-07	2.42502e-06
ENSG00000198963	41.9126	-1.23342	0.235494	-5.23759	1.62684e-07	2.42502e-06
ENSG00000147905	547.851	-0.820493	0.1567	-5.23607	1.64033e-07	2.44376e-06
ENSG00000144136	2430.9	-0.230618	0.0440594	-5.23426	1.65644e-07	2.46638e-06
ENSG00000171604	3240.65	0.232668	0.0444539	5.23391	1.65963e-07	2.46975e-06
ENSG00000137877	1057.04	1.01046	0.19308	5.23338	1.66439e-07	2.47545e-06
ENSG00000132204	130.787	-0.638093	0.121936	-5.23299	1.66787e-07	2.47924e-06
ENSG00000151276	1515.44	-0.300002	0.0573339	-5.23254	1.67196e-07	2.48105e-06
ENSG00000273448	37.4528	-1.63483	0.312436	-5.23255	1.67187e-07	2.48105e-06
ENSG00000179091	4776.55	-0.198673	0.0379694	-5.23244	1.67283e-07	2.48105e-06
ENSG00000129473	1293.24	0.280043	0.0535194	5.23256	1.67177e-07	2.48105e-06
ENSG00000186814	734.894	-0.324767	0.0620854	-5.23097	1.6862e-07	2.49948e-06
ENSG00000232677	2051.12	0.385435	0.0736924	5.23033	1.69211e-07	2.50685e-06
ENSG00000174628	235.156	-0.736667	0.140852	-5.23009	1.69424e-07	2.5086e-06
ENSG00000229808	25.0687	1.64525	0.314634	5.22911	1.7033e-07	2.52062e-06
ENSG00000247872	15.8808	2.64028	0.505034	5.22791	1.71436e-07	2.53557e-06
ENSG00000116191	1591.19	-0.490095	0.0937802	-5.226	1.73216e-07	2.56047e-06
ENSG00000230091	298.75	-0.536276	0.102728	-5.22037	1.78568e-07	2.63812e-06
ENSG00000140025	565.781	-0.490669	0.0939994	-5.21991	1.79009e-07	2.64317e-06
ENSG00000068650	902.437	-0.443672	0.085013	-5.21887	1.80018e-07	2.65659e-06
ENSG00000162817	1915.8	0.410492	0.0787085	5.21535	1.83473e-07	2.70608e-06
ENSG00000275029	12.8526	2.8169	0.54036	5.21301	1.85797e-07	2.73883e-06
ENSG00000133943	1961.73	-0.336258	0.064508	-5.21265	1.86157e-07	2.74262e-06
ENSG00000188321	630.945	0.397813	0.0763238	5.21217	1.86644e-07	2.74827e-06
ENSG00000080189	4223.35	0.322613	0.0619136	5.21069	1.88135e-07	2.76869e-06
ENSG00000157017	19.6378	-1.86924	0.358805	-5.20963	1.8922e-07	2.78311e-06
ENSG00000280193	39.1419	-1.25802	0.241526	-5.20864	1.9023e-07	2.79642e-06
ENSG00000198040	3261.31	-0.277411	0.0532618	-5.20845	1.90429e-07	2.7978e-06
ENSG00000091622	208.317	-0.927236	0.178081	-5.20682	1.92107e-07	2.8209e-06
ENSG00000246174	146.52	0.631173	0.121246	5.20574	1.93226e-07	2.83576e-06
ENSG00000073584	3371.79	-0.382152	0.0734182	-5.20515	1.93844e-07	2.84326e-06
ENSG00000278259	4760.8	-0.324372	0.062328	-5.20428	1.94749e-07	2.85495e-06
ENSG00000234028	103.071	0.893476	0.171717	5.2032	1.95886e-07	2.87004e-06
ENSG00000224420	263.072	1.15457	0.221911	5.20284	1.96261e-07	2.87395e-06
ENSG00000283199	434.333	0.710586	0.136612	5.20149	1.97693e-07	2.89334e-06
ENSG00000119899	551.726	-0.429096	0.0824967	-5.20137	1.97827e-07	2.8937e-06
ENSG00000111445	2650.58	-0.24635	0.047375	-5.2	1.9929e-07	2.9135e-06
ENSG00000259291	681.769	-0.438485	0.0843273	-5.19979	1.9951e-07	2.91511e-06
ENSG00000230102	106.332	0.818737	0.157675	5.19258	2.07402e-07	3.02875e-06
ENSG00000254389	379.395	0.505584	0.0973808	5.19182	2.08248e-07	3.03944e-06
ENSG00000165338	952.258	-0.67024	0.129107	-5.19137	2.08758e-07	3.0452e-06
ENSG00000112149	149.794	-0.670836	0.129232	-5.19095	2.09222e-07	3.0503e-06
ENSG00000115808	2378.39	-0.284093	0.0547333	-5.19049	2.0974e-07	3.05618e-06
ENSG00000156453	4416.41	0.39277	0.0757547	5.18476	2.16296e-07	3.14999e-06
ENSG00000230873	189.943	-0.714114	0.137778	-5.18308	2.18256e-07	3.17678e-06
ENSG00000213160	291.886	-0.578954	0.11171	-5.18264	2.18768e-07	3.1825e-06
ENSG00000095794	215.184	-0.604936	0.116733	-5.18222	2.1926e-07	3.18791e-06
ENSG00000235897	83.5485	0.826074	0.159445	5.18094	2.20765e-07	3.20628e-06
ENSG00000260563	307.743	0.486396	0.0938806	5.181	2.20698e-07	3.20628e-06
ENSG00000173674	3049.36	-0.470048	0.0907739	-5.17823	2.24005e-07	3.25155e-06
ENSG00000106012	6878.81	0.364332	0.0703657	5.17769	2.24647e-07	3.2591e-06
ENSG00000161638	725.272	0.401629	0.077632	5.17349	2.29756e-07	3.3314e-06
ENSG00000125652	639.725	0.360592	0.0697354	5.17086	2.33023e-07	3.37693e-06
ENSG00000136536	3130.54	-0.298189	0.0576714	-5.17048	2.33497e-07	3.38195e-06
ENSG00000146409	242.256	-0.514351	0.0995087	-5.1689	2.35473e-07	3.40871e-06
ENSG00000164983	906.776	-0.712321	0.137836	-5.16788	2.36768e-07	3.42559e-06
ENSG00000182580	3471.75	0.409689	0.0792872	5.16716	2.37681e-07	3.43693e-06
ENSG00000079482	522.461	-0.381916	0.0739251	-5.16626	2.3883e-07	3.45168e-06
ENSG00000273058	24.4984	-1.53213	0.296641	-5.16493	2.40524e-07	3.47426e-06
ENSG00000105983	1767.03	-0.415206	0.0803979	-5.16439	2.41223e-07	3.48247e-06
ENSG00000145949	47.4907	-1.22605	0.237595	-5.16024	2.46636e-07	3.55868e-06
ENSG00000172640	68.0285	1.16116	0.225117	5.15805	2.49541e-07	3.59864e-06
ENSG00000253305	278.708	0.505353	0.0979919	5.15709	2.50815e-07	3.61506e-06
ENSG00000223745	1249.57	-0.48556	0.0941748	-5.15595	2.52352e-07	3.63523e-06
ENSG00000137812	3211.85	-0.437847	0.0849378	-5.15491	2.5375e-07	3.65339e-06
ENSG00000082512	473.225	0.440477	0.085452	5.15467	2.54072e-07	3.65606e-06
ENSG00000215244	100.552	-0.979878	0.190157	-5.15301	2.56344e-07	3.68675e-06
ENSG00000187134	26.7468	-1.61293	0.313024	-5.15275	2.56692e-07	3.68976e-06
ENSG00000101040	4228.97	0.336892	0.0653953	5.15162	2.58243e-07	3.71004e-06
ENSG00000171132	561.15	-0.399328	0.0775165	-5.15152	2.58389e-07	3.71014e-06
ENSG00000144306	759.265	-0.428688	0.0832456	-5.14968	2.60932e-07	3.74173e-06
ENSG00000107186	1507.23	-0.248276	0.0482117	-5.1497	2.60898e-07	3.74173e-06
ENSG00000188312	220.451	-0.656666	0.127518	-5.14961	2.61029e-07	3.74173e-06
ENSG00000014138	3114.52	-0.406187	0.0788786	-5.14952	2.61153e-07	3.74173e-06
ENSG00000275542	50.1139	1.25861	0.244488	5.14794	2.63359e-07	3.77132e-06
ENSG00000230590	1477.38	-0.625415	0.121507	-5.14715	2.64478e-07	3.7853e-06
ENSG00000237711	9.01639	3.52811	0.685508	5.14671	2.65099e-07	3.79214e-06
ENSG00000228224	39.7889	3.06515	0.596013	5.14276	2.70736e-07	3.8707e-06
ENSG00000197763	448.584	-0.375818	0.0730843	-5.14226	2.7146e-07	3.87896e-06
ENSG00000256657	7.4129	5.6155	1.0921	5.14193	2.71934e-07	3.88364e-06
ENSG00000148444	295.444	-0.447315	0.0870623	-5.13788	2.77858e-07	3.96612e-06
ENSG00000163617	715.079	-0.367743	0.071594	-5.1365	2.799e-07	3.99313e-06
ENSG00000204338	43.7873	1.07344	0.209013	5.13576	2.81e-07	4.00667e-06
ENSG00000235475	33.6248	-1.93218	0.376265	-5.13517	2.81887e-07	4.01716e-06
ENSG00000157193	597.258	-0.417823	0.0813776	-5.13437	2.83086e-07	4.03208e-06
ENSG00000225778	54.9465	1.33113	0.25933	5.13295	2.85231e-07	4.05828e-06
ENSG00000231711	494.516	0.450737	0.0878122	5.13296	2.85222e-07	4.05828e-06
ENSG00000164406	95.3028	0.809082	0.157717	5.12996	2.89804e-07	4.12097e-06
ENSG00000204428	53.2268	1.1431	0.222838	5.12977	2.90102e-07	4.12097e-06
ENSG00000247903	254.884	-0.787078	0.153432	-5.12981	2.9003e-07	4.12097e-06
ENSG00000068383	807.74	-0.374665	0.0730393	-5.12964	2.90302e-07	4.1216e-06
ENSG00000248015	187.708	1.15895	0.225944	5.12938	2.90691e-07	4.12493e-06
ENSG00000126233	25.3183	1.57256	0.306596	5.12908	2.91164e-07	4.12943e-06
ENSG00000228486	300.144	-0.697525	0.136021	-5.12807	2.92728e-07	4.14719e-06
ENSG00000125787	69.1625	0.940489	0.1834	5.12808	2.92706e-07	4.14719e-06
ENSG00000271447	62.2807	0.937891	0.182951	5.12646	2.95244e-07	4.1806e-06
ENSG00000132463	3327.78	-0.31619	0.0616925	-5.12525	2.97147e-07	4.2053e-06
ENSG00000133398	477.687	-0.511961	0.0998969	-5.12489	2.97708e-07	4.21101e-06
ENSG00000189171	1435.56	0.590455	0.115237	5.12385	2.99364e-07	4.23218e-06
ENSG00000165269	18.3217	1.94141	0.378978	5.12274	3.0112e-07	4.25475e-06
ENSG00000276048	32.2035	1.32339	0.258405	5.12137	3.03319e-07	4.28354e-06
ENSG00000186280	38.944	-1.30914	0.255816	-5.11751	3.09602e-07	4.36994e-06
ENSG00000146830	3013.28	-0.481344	0.094098	-5.11534	3.1317e-07	4.41796e-06
ENSG00000235453	86.3084	0.876098	0.171293	5.11461	3.14387e-07	4.43277e-06
ENSG00000163939	2594.22	-0.259943	0.050831	-5.11387	3.15622e-07	4.44783e-06
ENSG00000094975	3646.65	-0.215611	0.0421907	-5.1104	3.21476e-07	4.52792e-06
ENSG00000246465	59.5293	1.04911	0.205294	5.1103	3.21654e-07	4.52803e-06
ENSG00000008838	3974.9	-0.352413	0.0689724	-5.10947	3.23058e-07	4.54538e-06
ENSG00000121542	746.189	-0.36826	0.0720887	-5.10842	3.24861e-07	4.56833e-06
ENSG00000138758	4601.61	-0.207148	0.0405544	-5.10791	3.2575e-07	4.57755e-06
ENSG00000272669	100.971	0.955022	0.186972	5.10784	3.25861e-07	4.57755e-06
ENSG00000197372	685.626	0.46486	0.0910457	5.10578	3.2943e-07	4.62524e-06
ENSG00000114735	2402.19	0.577165	0.113138	5.10141	3.37139e-07	4.73098e-06
ENSG00000174775	1624.88	0.311313	0.0610406	5.1001	3.39482e-07	4.76135e-06
ENSG00000133835	4989.06	-0.472881	0.0927224	-5.09997	3.39703e-07	4.76194e-06
ENSG00000080200	2162.91	-0.291654	0.0571987	-5.09897	3.4151e-07	4.78474e-06
ENSG00000156504	1069.67	-0.35561	0.0697537	-5.09808	3.43112e-07	4.80465e-06
ENSG00000025293	6086.62	-0.304959	0.0598239	-5.09762	3.43958e-07	4.81396e-06
ENSG00000120798	1271.73	-0.386028	0.0757459	-5.09635	3.46268e-07	4.84374e-06
ENSG00000176533	48.9737	-1.09869	0.21568	-5.09407	3.50464e-07	4.89985e-06
ENSG00000232233	61.1076	1.04082	0.20435	5.09333	3.51821e-07	4.91625e-06
ENSG00000113805	184.984	-0.570364	0.112009	-5.09213	3.54055e-07	4.94486e-06
ENSG00000250986	285.388	0.611118	0.120026	5.09156	3.55132e-07	4.9573e-06
ENSG00000189337	402.836	-0.492087	0.0966543	-5.0912	3.55796e-07	4.96397e-06
ENSG00000225210	42.2453	-1.18014	0.231835	-5.09043	3.57256e-07	4.98172e-06
ENSG00000186792	220.973	0.825733	0.162301	5.08766	3.62516e-07	5.05241e-06
ENSG00000270728	57.5642	-1.46395	0.287784	-5.08699	3.63792e-07	5.06754e-06
ENSG00000110987	1910.04	0.242648	0.047713	5.08558	3.66512e-07	5.10275e-06
ENSG00000168077	1241.41	0.28136	0.0553622	5.08218	3.73134e-07	5.19223e-06
ENSG00000234256	94.9341	-0.766594	0.150854	-5.08171	3.7405e-07	5.20225e-06
ENSG00000108064	2782.95	-0.261954	0.0515501	-5.08155	3.74364e-07	5.20389e-06
ENSG00000153250	983.232	-0.294129	0.0578842	-5.08133	3.74795e-07	5.20717e-06
ENSG00000263167	13.3803	2.24253	0.44143	5.08014	3.77154e-07	5.2372e-06
ENSG00000114021	2280.22	0.223531	0.044012	5.07887	3.79686e-07	5.2696e-06
ENSG00000184979	317.19	0.440119	0.0866628	5.07852	3.8039e-07	5.27662e-06
ENSG00000183479	79.3625	0.918551	0.180881	5.07822	3.80986e-07	5.28213e-06
ENSG00000243566	3857.64	0.437343	0.0861879	5.0743	3.88933e-07	5.3895e-06
ENSG00000124104	1234.23	0.357185	0.070395	5.074	3.89533e-07	5.395e-06
ENSG00000126581	2598.66	-0.284413	0.056066	-5.07283	3.91951e-07	5.42566e-06
ENSG00000162688	1626.88	-0.324491	0.0639705	-5.0725	3.92613e-07	5.432e-06
ENSG00000108244	3932.93	-0.500644	0.0987055	-5.0721	3.93443e-07	5.44065e-06
ENSG00000144355	1156.89	0.299693	0.0590892	5.07187	3.9393e-07	5.44456e-06
ENSG00000254087	298.544	-0.594247	0.117174	-5.07148	3.94743e-07	5.45295e-06
ENSG00000134463	348.464	-0.436623	0.0860992	-5.07116	3.9539e-07	5.45905e-06
ENSG00000138380	258.314	-0.527246	0.103977	-5.07078	3.96186e-07	5.4672e-06
ENSG00000260766	239.836	-0.52943	0.104422	-5.07008	3.97649e-07	5.48454e-06
ENSG00000236254	9.16295	3.80441	0.750774	5.06731	4.0347e-07	5.56194e-06
ENSG00000254876	60.4076	0.986474	0.194717	5.0662	4.05832e-07	5.5916e-06
ENSG00000239883	405.87	-0.535543	0.105717	-5.0658	4.06682e-07	5.60041e-06
ENSG00000166012	3572.23	0.393293	0.0776807	5.06295	4.12825e-07	5.68206e-06
ENSG00000224081	86.7052	-0.74638	0.147468	-5.06128	4.16443e-07	5.72889e-06
ENSG00000125871	2750.69	-0.371079	0.0733363	-5.05996	4.19344e-07	5.76582e-06
ENSG00000117472	475.578	0.427678	0.084524	5.05984	4.19614e-07	5.76655e-06
ENSG00000225791	360.948	0.517647	0.102334	5.05841	4.22767e-07	5.80688e-06
ENSG00000211454	40.7821	-1.41991	0.280977	-5.05346	4.33876e-07	5.95638e-06
ENSG00000106077	4140	-0.214225	0.0424004	-5.05244	4.36213e-07	5.98537e-06
ENSG00000167703	1538.22	0.55393	0.109642	5.05219	4.3678e-07	5.99006e-06
ENSG00000236420	8.96698	-3.74476	0.741236	-5.05205	4.3709e-07	5.99122e-06
ENSG00000229376	41.7501	2.16532	0.428934	5.04814	4.46131e-07	6.11199e-06
ENSG00000233791	109.088	0.712182	0.141185	5.04432	4.55135e-07	6.22893e-06
ENSG00000168286	1113.53	-0.336515	0.0667106	-5.0444	4.54937e-07	6.22893e-06
ENSG00000166246	114.628	0.785355	0.155696	5.04415	4.55533e-07	6.23116e-06
ENSG00000124786	554.347	-0.407399	0.0807703	-5.04392	4.56101e-07	6.23572e-06
ENSG00000198917	1788.28	-0.25125	0.0498143	-5.04373	4.56545e-07	6.23858e-06
ENSG00000230069	31.3157	1.35008	0.267702	5.04322	4.5776e-07	6.25197e-06
ENSG00000175920	164.495	1.24031	0.245953	5.04287	4.5859e-07	6.26009e-06
ENSG00000251474	1486.55	0.341435	0.0677579	5.03905	4.67848e-07	6.37992e-06
ENSG00000140525	6304.65	-0.313883	0.0622896	-5.03909	4.67745e-07	6.37992e-06
ENSG00000221994	390.369	0.540845	0.107364	5.03748	4.7171e-07	6.42599e-06
ENSG00000184083	1358.32	-0.690201	0.137012	-5.03751	4.71636e-07	6.42599e-06
ENSG00000183826	1272.92	-0.290806	0.0577338	-5.03702	4.72828e-07	6.43792e-06
ENSG00000213672	1461	-0.361852	0.0718499	-5.03622	4.7481e-07	6.4616e-06
ENSG00000097046	776.655	-0.319622	0.0634682	-5.03594	4.75501e-07	6.46769e-06
ENSG00000184517	685.403	0.314712	0.0625055	5.03495	4.77967e-07	6.49791e-06
ENSG00000204947	167.228	-0.680699	0.135218	-5.03408	4.80148e-07	6.52422e-06
ENSG00000166145	30659.8	0.237672	0.0472388	5.03129	4.87183e-07	6.61642e-06
ENSG00000142166	3566.29	-0.212134	0.0421776	-5.02954	4.91653e-07	6.67372e-06
ENSG00000256196	88.8442	0.781258	0.155349	5.02906	4.92901e-07	6.68685e-06
ENSG00000137672	31.701	1.33414	0.26529	5.02897	4.93123e-07	6.68685e-06
ENSG00000131730	222.442	0.74127	0.147465	5.02676	4.98844e-07	6.76097e-06
ENSG00000151575	340.481	-0.625091	0.124396	-5.02499	5.03455e-07	6.81999e-06
ENSG00000282851	418.818	0.449889	0.0895691	5.02282	5.09194e-07	6.89423e-06
ENSG00000162441	831.511	-0.348339	0.0694107	-5.01852	5.20711e-07	7.04657e-06
ENSG00000232352	117.199	0.914127	0.182171	5.01795	5.22248e-07	7.06377e-06
ENSG00000188167	139.542	0.936373	0.186636	5.01711	5.24546e-07	7.09045e-06
ENSG00000100297	2128.84	-0.21513	0.04288	-5.01703	5.24754e-07	7.09045e-06
ENSG00000129636	3026.19	-0.408751	0.081513	-5.01454	5.31596e-07	7.17925e-06
ENSG00000203711	58.2024	0.995543	0.198536	5.01443	5.31915e-07	7.17991e-06
ENSG00000164989	177.455	-0.689414	0.137575	-5.01118	5.40962e-07	7.29832e-06
ENSG00000233217	14.1064	2.21469	0.442154	5.00887	5.47505e-07	7.38285e-06
ENSG00000268201	34.9648	-1.50323	0.300127	-5.00863	5.48179e-07	7.38819e-06
ENSG00000152926	535.945	-0.714518	0.142707	-5.00689	5.53153e-07	7.45144e-06
ENSG00000109339	140.81	-0.627756	0.125493	-5.00231	5.66479e-07	7.62709e-06
ENSG00000150456	87.1669	-1.25863	0.251666	-5.00119	5.69778e-07	7.66762e-06
ENSG00000106608	1983.01	0.295271	0.0590445	5.00082	5.70871e-07	7.67844e-06
ENSG00000174695	4870.41	-0.542346	0.108516	-4.99785	5.79717e-07	7.79348e-06
ENSG00000115266	444.355	0.725195	0.145132	4.9968	5.82885e-07	7.83212e-06
ENSG00000274520	49.1677	1.09831	0.219858	4.99553	5.8674e-07	7.87594e-06
ENSG00000274718	39.4008	1.09794	0.219782	4.99559	5.86553e-07	7.87594e-06
ENSG00000135968	2376.47	0.429558	0.0859951	4.99514	5.8792e-07	7.88781e-06
ENSG00000197106	347.483	0.480752	0.0962651	4.99405	5.91276e-07	7.92713e-06
ENSG00000075539	2323.19	-0.450438	0.0901961	-4.99399	5.91448e-07	7.92713e-06
ENSG00000260495	127.199	0.718534	0.144011	4.98942	6.05609e-07	8.11284e-06
ENSG00000257270	115.106	-0.822368	0.164849	-4.9886	6.08177e-07	8.14314e-06
ENSG00000179941	1135.9	0.329919	0.066141	4.98812	6.09692e-07	8.15931e-06
ENSG00000143434	659.844	0.962378	0.192943	4.9879	6.104e-07	8.16467e-06
ENSG00000240498	127.263	-0.654303	0.131196	-4.98721	6.12578e-07	8.18968e-06
ENSG00000120549	3323.99	-0.338955	0.067988	-4.98552	6.17969e-07	8.25761e-06
ENSG00000139679	66.574	0.887643	0.178064	4.98497	6.19729e-07	8.27696e-06
ENSG00000259956	2544.84	0.213887	0.0429182	4.9836	6.24111e-07	8.3313e-06
ENSG00000180773	744.558	-0.387311	0.0777308	-4.98273	6.26936e-07	8.36481e-06
ENSG00000233750	36.8019	1.46967	0.29496	4.98261	6.27336e-07	8.36595e-06
ENSG00000272108	13.2047	-3.27897	0.658183	-4.98185	6.29798e-07	8.39457e-06
ENSG00000237077	25.0808	6.11417	1.22784	4.97959	6.37179e-07	8.4887e-06
ENSG00000185238	661.182	-0.337478	0.0678146	-4.97648	6.47494e-07	8.6214e-06
ENSG00000255197	15.5522	1.97345	0.396569	4.9763	6.48113e-07	8.6214e-06
ENSG00000239763	58.0463	-1.04818	0.210633	-4.97634	6.47988e-07	8.6214e-06
ENSG00000172159	165.268	0.662987	0.133254	4.97535	6.51282e-07	8.65922e-06
ENSG00000125676	2956.79	-0.36662	0.0736898	-4.97518	6.51857e-07	8.66253e-06
ENSG00000130382	3598.03	0.296283	0.0595629	4.97429	6.5488e-07	8.69835e-06
ENSG00000076770	506.986	-0.585389	0.117688	-4.97406	6.55657e-07	8.70432e-06
[truncated: 24,576 more rows]

## Sheet: T72VT0, A3B, Poly-A enrichment
ensembl_gene_id	baseMean	log2FoldChange	lfcSE	stat	pvalue	padj
ENSG00000160862	3857.07	2.89292	0.0776864	37.2384	1.62983e-303	6.57077e-300
ENSG00000057593	575.857	4.07127	0.109911	37.0416	2.45e-300	8.64267e-297
ENSG00000244242	1051.37	3.06651	0.0846501	36.2257	2.39631e-287	7.51403e-284
ENSG00000267185	507.542	5.42539	0.153698	35.2989	6.10691e-273	1.72343e-269
ENSG00000112964	3580.52	-1.97727	0.0563296	-35.1019	6.3067e-270	1.61801e-266
ENSG00000167995	951.695	2.71872	0.0779631	34.8718	1.98675e-266	4.67235e-263
ENSG00000108231	535.361	5.34084	0.154222	34.6308	8.68307e-263	1.88496e-259
ENSG00000068976	579.618	4.21833	0.123325	34.2049	2.04803e-256	4.12839e-253
ENSG00000218336	5365.35	-1.77128	0.0518556	-34.1579	1.02181e-255	1.92244e-252
ENSG00000177119	5197.99	-1.6945	0.0503829	-33.6325	5.61164e-248	9.89788e-245
ENSG00000221995	746.605	2.92228	0.0869087	33.6247	7.31177e-248	1.2138e-244
ENSG00000116260	8627.43	1.99191	0.06098	32.665	4.90639e-234	7.69239e-231
ENSG00000217241	485.038	5.59928	0.171889	32.5749	9.2963e-233	1.38079e-229
ENSG00000107562	1859.24	2.43754	0.0758737	32.1264	1.88917e-226	2.66572e-223
ENSG00000148175	2803.94	-1.66717	0.0521152	-31.9902	1.49221e-224	2.00532e-221
ENSG00000158445	1076.75	-2.85444	0.0894436	-31.9134	1.743e-223	2.23587e-220
ENSG00000101203	700.157	7.07975	0.222326	31.844	1.59199e-222	1.95337e-219
ENSG00000145014	1998.36	2.37085	0.0748422	31.6779	3.1276e-220	3.67766e-217
ENSG00000113389	635.572	-2.85685	0.0902762	-31.6456	8.71281e-220	9.83537e-217
ENSG00000186868	2293.16	1.8772	0.0594198	31.5921	4.73375e-219	5.13812e-216
ENSG00000143776	7763.91	-1.7412	0.0551832	-31.5532	1.62203e-218	1.69538e-215
ENSG00000165272	601.641	3.26673	0.103719	31.4961	9.82931e-218	9.90689e-215
ENSG00000078018	681.43	-3.53262	0.11335	-31.1655	3.12783e-213	3.04381e-210
ENSG00000246982	477.668	-3.79184	0.12316	-30.7879	3.80162e-208	3.57618e-205
ENSG00000112759	3513.61	1.55067	0.05039	30.7733	5.95853e-208	5.42438e-205
ENSG00000170099	22182.5	1.9841	0.0647155	30.6588	2.01971e-206	1.7812e-203
ENSG00000067064	4247.06	-1.79126	0.0584486	-30.6467	2.92822e-206	2.50416e-203
ENSG00000169855	3023.43	-1.62842	0.0532819	-30.5623	3.87811e-205	3.21894e-202
ENSG00000130720	578.681	4.49689	0.14947	30.0856	7.47093e-199	6.02392e-196
ENSG00000256745	397.432	4.73289	0.158362	29.8864	2.95332e-196	2.31516e-193
ENSG00000159167	1044.48	2.50893	0.0840923	29.8355	1.35561e-195	1.03396e-192
ENSG00000180574	323.746	4.24039	0.142612	29.7337	2.81489e-194	2.0905e-191
ENSG00000151715	3049.99	-1.90853	0.0645637	-29.5604	4.82714e-192	3.49299e-189
ENSG00000183098	723.203	-3.10003	0.105154	-29.481	5.04792e-191	3.56143e-188
ENSG00000198910	2238.97	-1.99144	0.0676014	-29.4586	9.77918e-191	6.73118e-188
ENSG00000082175	13445.2	2.5153	0.085451	29.4355	1.92779e-190	1.29534e-187
ENSG00000105492	401.318	5.3721	0.183455	29.2829	1.7131e-188	1.12431e-185
ENSG00000151914	4794.82	-1.84747	0.0630944	-29.2811	1.8073e-188	1.15917e-185
ENSG00000204248	1236.56	2.61484	0.0893234	29.2739	2.23003e-188	1.39852e-185
ENSG00000116106	984.566	-2.04412	0.0701491	-29.1396	1.13193e-186	6.9444e-184
ENSG00000197565	667.023	-3.84972	0.133876	-28.7558	7.67084e-182	4.60593e-179
ENSG00000145730	2378.79	-2.21087	0.0773519	-28.582	1.12527e-179	6.61588e-177
ENSG00000115561	1414.46	-1.96329	0.0687339	-28.5636	1.90451e-179	1.09688e-176
ENSG00000175928	467.299	-4.57826	0.160566	-28.5133	8.01234e-179	4.52233e-176
ENSG00000088367	3309.28	1.70072	0.0597881	28.4457	5.50779e-178	3.04775e-175
ENSG00000166801	8302.85	-1.68925	0.0595454	-28.3691	4.86626e-177	2.64097e-174
ENSG00000176658	3640.13	-1.76625	0.063489	-27.8198	2.49924e-170	1.33078e-167
ENSG00000104361	663.144	-2.93414	0.105704	-27.758	1.39706e-169	7.30118e-167
ENSG00000136944	1291.1	2.01289	0.0725926	27.7286	3.15355e-169	1.61811e-166
ENSG00000109472	2951.71	-2.16783	0.0782125	-27.7172	4.32814e-169	2.18115e-166
ENSG00000280287	458.653	3.32695	0.121778	27.3196	2.47837e-164	1.22705e-161
ENSG00000173391	1050.72	-2.09102	0.0766154	-27.2924	5.2156e-164	2.53775e-161
ENSG00000182985	3489.07	1.55243	0.0576641	26.922	1.21531e-159	5.81309e-157
ENSG00000113946	574.7	-3.04009	0.113074	-26.886	3.20395e-159	1.50698e-156
ENSG00000185442	2366.47	-1.46099	0.0544736	-26.8202	1.88068e-158	8.70077e-156
ENSG00000169169	332.598	2.98668	0.111455	26.7971	3.4924e-158	1.58966e-155
ENSG00000163347	42446.5	-1.60894	0.0607649	-26.4782	1.72867e-154	7.7436e-152
ENSG00000164403	1829.78	1.68202	0.0638973	26.3239	1.02289e-152	4.51048e-150
ENSG00000101255	4252.89	1.73579	0.0660334	26.2866	2.73053e-152	1.18551e-149
ENSG00000180867	1148.24	2.67699	0.102511	26.1143	2.50839e-150	1.07256e-147
ENSG00000182704	1181.94	1.79264	0.068722	26.0854	5.33495e-150	2.24713e-147
ENSG00000185008	403.34	-3.90078	0.149815	-26.0374	1.86781e-149	7.7517e-147
ENSG00000131471	344.003	3.57029	0.137276	26.0081	4.00966e-149	1.63995e-146
ENSG00000070886	298.583	3.11128	0.119963	25.9354	2.65709e-148	1.07122e-145
ENSG00000066279	4493.39	-2.11997	0.0818906	-25.8878	9.13664e-148	3.63162e-145
ENSG00000117305	1426.06	1.68644	0.0652596	25.8421	2.98798e-147	1.17116e-144
ENSG00000143365	1169.01	1.89443	0.0733178	25.8386	3.26395e-147	1.26181e-144
ENSG00000107731	727.573	2.20028	0.086195	25.5268	9.93442e-144	3.78864e-141
ENSG00000186377	640.464	1.99339	0.0785378	25.3813	4.05871e-142	1.52721e-139
ENSG00000108679	3365.28	1.65332	0.0652632	25.333	1.38233e-141	5.133e-139
ENSG00000109929	3455.48	-1.39443	0.0550823	-25.3154	2.16015e-141	7.91708e-139
ENSG00000134258	2287.79	-2.33198	0.0921422	-25.3084	2.57848e-141	9.32915e-139
ENSG00000170075	453.776	2.42455	0.0959084	25.2798	5.32408e-141	1.90191e-138
ENSG00000185567	1438.44	1.5049	0.0595857	25.2561	9.70457e-141	3.38115e-138
ENSG00000196421	1656.58	2.5866	0.102413	25.2565	9.60721e-141	3.38115e-138
ENSG00000283413	706.804	-3.2984	0.130931	-25.192	4.90364e-140	1.68763e-137
ENSG00000116016	14179.1	-1.49606	0.0602812	-24.818	5.72483e-136	1.94651e-133
ENSG00000173227	972.528	1.88758	0.0768412	24.5646	3.01669e-133	1.0135e-130
ENSG00000084628	233.12	3.31505	0.135063	24.5445	4.94801e-133	1.6428e-130
ENSG00000169439	2570.05	-2.08696	0.0853517	-24.4513	4.87239e-132	1.59888e-129
ENSG00000121089	245.725	5.6344	0.231992	24.287	2.68704e-130	8.71619e-128
ENSG00000136883	254.933	2.95567	0.12173	24.2805	3.14876e-130	1.00979e-127
ENSG00000235297	309.754	6.54111	0.269759	24.248	6.94229e-130	2.20133e-127
ENSG00000245532	62290.1	-1.68045	0.0696644	-24.1221	1.46437e-128	4.59177e-126
ENSG00000215817	205.747	4.12257	0.172375	23.9163	2.07067e-126	6.42158e-124
ENSG00000188153	2397.07	-2.6521	0.111161	-23.8581	8.34924e-126	2.56113e-123
ENSG00000129625	16543.3	-1.2542	0.0526359	-23.8278	1.71997e-125	5.21929e-123
ENSG00000183963	5009.21	-1.46134	0.061397	-23.8014	3.23018e-125	9.69775e-123
ENSG00000213793	1026.18	-1.693	0.0712209	-23.7711	6.65682e-125	1.9775e-122
ENSG00000127578	590.472	2.63485	0.110901	23.7586	8.95276e-125	2.63183e-122
ENSG00000131480	352.337	2.50395	0.105477	23.7394	1.41227e-124	4.10884e-122
ENSG00000040731	328.206	-2.73034	0.115377	-23.6646	8.35835e-124	2.40695e-121
ENSG00000135374	7070.69	-1.21809	0.0515361	-23.6357	1.65668e-123	4.72254e-121
ENSG00000154975	468.718	-6.31545	0.267617	-23.5988	3.96479e-123	1.1189e-120
ENSG00000205022	227.382	3.28833	0.13971	23.5368	1.71218e-122	4.78412e-120
ENSG00000150672	818.396	-2.31639	0.09863	-23.4857	5.7109e-122	1.58007e-119
ENSG00000064300	307.974	2.96309	0.126204	23.4786	6.74557e-122	1.84822e-119
ENSG00000110013	1479.38	-1.49001	0.0635009	-23.4644	9.41751e-122	2.5555e-119
ENSG00000158258	1977.25	1.37565	0.0591325	23.2639	1.02802e-119	2.76301e-117
ENSG00000179954	265.338	2.77689	0.119534	23.2309	2.21967e-119	5.90956e-117
ENSG00000162975	445.7	2.81252	0.121115	23.2219	2.73373e-119	7.21014e-117
ENSG00000102038	2457.2	-2.1118	0.0909902	-23.2091	3.68885e-119	9.63916e-117
ENSG00000167772	1629.14	-2.09188	0.090646	-23.0775	7.79425e-118	2.018e-115
ENSG00000180389	441.955	7.15336	0.310367	23.0481	1.53831e-117	3.9466e-115
ENSG00000114270	4545.11	2.72092	0.118094	23.0403	1.83996e-117	4.67798e-115
ENSG00000253352	9060.61	-1.04472	0.0454084	-23.0072	3.94579e-117	9.94232e-115
ENSG00000166126	215.646	3.59883	0.157048	22.9155	3.25471e-116	8.12842e-114
ENSG00000078401	10262	-1.15769	0.0506612	-22.8516	1.40872e-115	3.48732e-113
ENSG00000099194	32616.8	-1.51931	0.066591	-22.8156	3.20899e-115	7.87486e-113
ENSG00000143162	4607.63	-1.39373	0.0610911	-22.814	3.33185e-115	8.10587e-113
ENSG00000174099	631.029	-2.10559	0.0924857	-22.7667	9.80554e-115	2.36515e-112
ENSG00000078804	4319.08	-1.31672	0.0578761	-22.7507	1.4134e-114	3.38029e-112
ENSG00000163993	289.909	2.61821	0.115171	22.7333	2.10034e-114	4.98099e-112
ENSG00000173114	232.773	-4.0678	0.179144	-22.7069	3.8269e-114	8.99992e-112
ENSG00000177694	371.611	-2.49068	0.109864	-22.6706	8.73765e-114	2.03789e-111
ENSG00000161638	1142.15	1.73267	0.076462	22.6606	1.09799e-113	2.53986e-111
ENSG00000156804	6894.31	-1.2228	0.0541304	-22.5898	5.45456e-113	1.25149e-110
ENSG00000163517	1093.18	1.40502	0.0622634	22.5658	9.39416e-113	2.138e-110
ENSG00000092931	1472.98	-1.54009	0.0683725	-22.5251	2.35843e-112	5.32458e-110
ENSG00000073067	322.392	3.25627	0.145066	22.4469	1.37301e-111	3.07522e-109
ENSG00000103154	186.607	4.49297	0.200218	22.4404	1.58892e-111	3.53079e-109
ENSG00000198945	614.776	-2.34208	0.104599	-22.391	4.81828e-111	1.06232e-108
ENSG00000130066	2288.39	-1.61473	0.072237	-22.3533	1.12202e-110	2.45461e-108
ENSG00000233885	447.288	1.88923	0.084687	22.3084	3.06584e-110	6.65547e-108
ENSG00000261505	616.108	2.08872	0.0936485	22.3038	3.39195e-110	7.30718e-108
ENSG00000115904	1369.72	-1.31153	0.0588134	-22.2999	3.70616e-110	7.92361e-108
ENSG00000148344	1261.76	1.81576	0.0818907	22.173	6.26073e-109	1.32845e-106
ENSG00000075223	7143.77	1.53638	0.0693171	22.1645	7.56028e-109	1.59223e-106
ENSG00000153404	4886.98	-1.4209	0.0643017	-22.0974	3.34622e-108	6.99509e-106
ENSG00000139626	310.619	2.76803	0.125732	22.0153	2.05624e-107	4.26686e-105
ENSG00000149150	164.528	3.99963	0.181866	21.9922	3.41796e-107	7.04074e-105
ENSG00000178538	809.544	1.61896	0.0737963	21.9382	1.12137e-106	2.2932e-104
ENSG00000114770	9354.32	1.22691	0.056071	21.8813	3.91561e-106	7.94982e-104
ENSG00000142303	276.826	3.08079	0.140965	21.855	6.96755e-106	1.40451e-103
ENSG00000168447	509.744	1.82531	0.0837653	21.7908	2.83833e-105	5.68088e-103
ENSG00000058668	2164.16	-1.38587	0.0636781	-21.7637	5.12021e-105	1.01759e-102
ENSG00000129159	256.999	-3.16775	0.14568	-21.7445	7.7926e-105	1.53787e-102
ENSG00000102595	760.757	-1.68758	0.0776254	-21.7401	8.56933e-105	1.67941e-102
ENSG00000108352	2226.21	1.67441	0.0770268	21.738	8.9684e-105	1.7455e-102
ENSG00000248905	2872.96	1.55485	0.0715283	21.7375	9.06344e-105	1.75191e-102
ENSG00000141753	12475.3	1.61947	0.0745633	21.7194	1.34382e-104	2.57985e-102
ENSG00000052802	1376.82	-2.43288	0.11207	-21.7085	1.70657e-104	3.25413e-102
ENSG00000124496	908.441	1.45421	0.0670555	21.6866	2.74295e-104	5.19523e-102
ENSG00000162704	4751.09	-1.05953	0.048911	-21.6625	4.63316e-104	8.71683e-102
ENSG00000225362	261.499	2.5343	0.117314	21.6027	1.69235e-103	3.16291e-101
ENSG00000143416	2839.27	1.54633	0.0716764	21.5738	3.16497e-103	5.87623e-101
ENSG00000113763	268.925	2.72583	0.126465	21.554	4.86154e-103	8.96716e-101
ENSG00000172987	426.562	2.96027	0.137551	21.5213	9.83881e-103	1.80299e-100
ENSG00000072274	74653.4	-1.38334	0.0644437	-21.4659	3.24157e-102	5.90197e-100
ENSG00000183779	3381.88	2.06252	0.0966495	21.3402	4.80756e-101	8.69706e-99
ENSG00000253506	256.644	6.74669	0.316358	21.3261	6.49632e-101	1.16772e-98
ENSG00000166734	2228.85	-1.74095	0.0816944	-21.3106	9.05854e-101	1.61798e-98
ENSG00000232931	320.817	-2.55749	0.12041	-21.2398	4.10053e-100	7.27805e-98
ENSG00000128872	689.247	-1.61546	0.0761664	-21.2097	7.77698e-100	1.37171e-97
ENSG00000042062	968.94	2.3368	0.110396	21.1674	1.90636e-99	3.34158e-97
ENSG00000095951	3068.44	-1.03544	0.0489338	-21.1599	2.23647e-99	3.89601e-97
ENSG00000196372	1556.67	1.34944	0.063799	21.1514	2.67943e-99	4.63902e-97
ENSG00000127084	229.537	2.4658	0.11662	21.1438	3.1472e-99	5.41568e-97
ENSG00000154127	220.28	-4.72505	0.223817	-21.1112	6.27846e-99	1.07384e-96
ENSG00000054654	5838.94	-1.14304	0.0541523	-21.108	6.72107e-99	1.14262e-96
ENSG00000154309	318.113	-2.53574	0.120384	-21.0638	1.70781e-98	2.886e-96
ENSG00000152284	719.94	-2.83242	0.134646	-21.0361	3.06684e-98	5.15175e-96
ENSG00000164082	275.509	2.55929	0.121687	21.0317	3.36385e-98	5.61723e-96
ENSG00000118160	232.032	2.73863	0.130254	21.0253	3.84753e-98	6.38712e-96
ENSG00000164188	211.219	-4.1249	0.19638	-21.0047	5.93584e-98	9.79622e-96
ENSG00000123358	566.375	1.66437	0.0793096	20.9858	8.84967e-98	1.45202e-95
ENSG00000260633	206.017	3.77254	0.180619	20.8867	7.07596e-97	1.15428e-94
ENSG00000115919	2947.42	-1.61669	0.0777308	-20.7986	4.45837e-96	7.23101e-94
ENSG00000130518	2002.7	1.55047	0.0745663	20.7932	4.98377e-96	8.03697e-94
ENSG00000127527	2765.28	1.21312	0.0584009	20.7724	7.69894e-96	1.2345e-93
ENSG00000116774	1786.56	1.79136	0.0865063	20.7078	2.94334e-95	4.69288e-93
ENSG00000035664	627.156	-2.69004	0.129941	-20.7021	3.31814e-95	5.26074e-93
ENSG00000100346	473.858	2.35187	0.113694	20.686	4.62687e-95	7.29468e-93
ENSG00000130558	2068.56	1.63676	0.0791271	20.6853	4.70249e-95	7.37271e-93
ENSG00000109758	186.256	3.45456	0.167103	20.6733	6.0284e-95	9.3993e-93
ENSG00000133318	12651.6	-1.18588	0.0574278	-20.6499	9.78588e-95	1.5174e-92
ENSG00000033327	3187.51	1.17222	0.0568574	20.6168	1.93974e-94	2.99134e-92
ENSG00000182240	4008.25	-1.30157	0.063437	-20.5175	1.5031e-93	2.30538e-91
ENSG00000141429	2352.71	-1.29141	0.0630033	-20.4975	2.26509e-93	3.4553e-91
ENSG00000173517	473.435	-1.76624	0.0861965	-20.4908	2.60004e-93	3.94493e-91
ENSG00000185686	2626.48	1.12192	0.0547531	20.4905	2.61806e-93	3.95103e-91
ENSG00000147403	15786.9	1.10122	0.0539318	20.4188	1.13755e-92	1.7076e-90
ENSG00000111799	18061	1.50771	0.0738414	20.4182	1.15313e-92	1.72183e-90
ENSG00000166986	11174.7	1.2103	0.0592831	20.4157	1.21377e-92	1.80283e-90
ENSG00000104427	310.28	2.27101	0.111345	20.3962	1.80568e-92	2.66797e-90
ENSG00000171401	160.013	3.40198	0.16705	20.365	3.42078e-92	5.02801e-90
ENSG00000186205	499.334	1.65966	0.081523	20.3582	3.92504e-92	5.73931e-90
ENSG00000165102	3655.53	-1.076	0.0528863	-20.3456	5.07886e-92	7.38817e-90
ENSG00000165731	287.022	2.2079	0.108522	20.3453	5.1104e-92	7.39593e-90
ENSG00000198113	332.036	2.17744	0.107058	20.3389	5.82396e-92	8.38562e-90
ENSG00000100605	2898.71	1.3385	0.0658449	20.3281	7.25056e-92	1.03867e-89
ENSG00000160180	1252.27	1.74682	0.0859987	20.3122	1.00341e-91	1.43017e-89
ENSG00000196715	1604.74	-1.12609	0.055659	-20.232	5.12014e-91	7.26108e-89
ENSG00000170835	272.226	2.19569	0.108641	20.2106	7.89735e-91	1.11436e-88
ENSG00000124767	5671.93	-1.16059	0.0574927	-20.1868	1.27998e-90	1.79714e-88
ENSG00000037280	846.257	1.6687	0.0827069	20.1761	1.58722e-90	2.21748e-88
ENSG00000259459	215.403	2.74007	0.136076	20.1364	3.54295e-90	4.9254e-88
ENSG00000006534	1305.3	1.78125	0.0886256	20.0986	7.58653e-90	1.04951e-87
ENSG00000155846	505.211	2.13927	0.106569	20.074	1.24462e-89	1.71338e-87
ENSG00000102547	756.805	-1.56303	0.0778826	-20.069	1.37768e-89	1.88735e-87
ENSG00000172296	763.666	-1.62182	0.0808614	-20.0569	1.75876e-89	2.39777e-87
ENSG00000171155	919.442	-1.52701	0.0762293	-20.0317	2.91356e-89	3.95305e-87
ENSG00000096063	2100.88	-1.19097	0.0596519	-19.9653	1.10394e-88	1.49064e-86
ENSG00000099246	7765.88	-1.48667	0.0746622	-19.912	3.20391e-88	4.3056e-86
ENSG00000213853	10470.2	-0.937338	0.047086	-19.9069	3.54289e-88	4.73858e-86
ENSG00000183888	181.983	3.02511	0.152047	19.8959	4.41796e-88	5.8811e-86
ENSG00000074527	1014.39	-1.70354	0.0859901	-19.8109	2.39912e-87	3.17866e-85
ENSG00000137573	282.115	-2.49126	0.126134	-19.7508	7.89017e-87	1.04051e-84
ENSG00000166432	409.043	-2.01437	0.102107	-19.728	1.23979e-86	1.62735e-84
ENSG00000168385	5816.04	-0.923487	0.0468159	-19.7259	1.29151e-86	1.6874e-84
ENSG00000171848	6432.66	-1.4598	0.0740726	-19.7077	1.85019e-86	2.40619e-84
ENSG00000130513	622.954	2.69565	0.136955	19.6827	3.0367e-86	3.93114e-84
ENSG00000167460	399.515	-3.67166	0.186964	-19.6384	7.27019e-86	9.36859e-84
ENSG00000162461	230.59	2.41106	0.122789	19.6358	7.6454e-86	9.80731e-84
ENSG00000120837	3316.32	-1.75047	0.0892565	-19.6117	1.22848e-85	1.56873e-83
ENSG00000117868	5103.87	-0.814589	0.0416477	-19.559	3.45561e-85	4.39283e-83
ENSG00000198053	612.96	1.60359	0.0821935	19.51	9.03444e-85	1.14332e-82
ENSG00000137944	541.311	-2.26767	0.116245	-19.5078	9.43064e-85	1.18813e-82
ENSG00000225355	341.753	7.99253	0.410824	19.4549	2.65063e-84	3.3246e-82
ENSG00000105711	215.588	2.42421	0.12515	19.3704	1.37061e-83	1.71151e-81
ENSG00000280128	409.722	-2.44353	0.126244	-19.3557	1.8255e-83	2.2695e-81
ENSG00000182472	125.37	3.82927	0.197889	19.3506	2.01549e-83	2.4947e-81
ENSG00000078124	946.48	-1.44591	0.074826	-19.3236	3.40134e-83	4.19167e-81
ENSG00000119242	898.557	-1.91407	0.0990954	-19.3155	3.98212e-83	4.88606e-81
ENSG00000170412	3910.42	1.33303	0.0691162	19.2868	6.93649e-83	8.47423e-81
ENSG00000119673	934.984	1.57302	0.081605	19.276	8.54736e-83	1.03972e-80
ENSG00000197249	3902.38	1.96094	0.101856	19.2521	1.3544e-82	1.64046e-80
ENSG00000223599	165.608	3.4787	0.180704	19.2509	1.38848e-82	1.67454e-80
ENSG00000277998	179.534	5.21598	0.271274	19.2277	2.16916e-82	2.60493e-80
ENSG00000118513	667.042	2.13848	0.111234	19.225	2.28677e-82	2.73453e-80
ENSG00000140798	1797.76	1.83057	0.0953253	19.2034	3.46732e-82	4.12875e-80
ENSG00000167771	397.89	2.03751	0.106255	19.1757	5.90803e-82	7.00549e-80
ENSG00000118194	142.29	4.05852	0.21168	19.1729	6.23596e-82	7.36339e-80
ENSG00000100889	1217.31	1.4496	0.07566	19.1594	8.07283e-82	9.49264e-80
ENSG00000106070	3280.4	1.10984	0.0579791	19.1421	1.12677e-81	1.31944e-79
ENSG00000172292	2306.13	-1.09635	0.0573439	-19.1188	1.75976e-81	2.05215e-79
ENSG00000100181	1116.78	-1.2521	0.0655665	-19.0966	2.69477e-81	3.12959e-79
ENSG00000138496	2316.19	-1.27378	0.0667031	-19.0962	2.71456e-81	3.13966e-79
ENSG00000278341	530.26	1.94572	0.102101	19.0569	5.7611e-81	6.63608e-79
ENSG00000127920	2323.27	1.07614	0.0565076	19.0441	7.34804e-81	8.42964e-79
ENSG00000185305	464.236	-2.15749	0.11335	-19.0339	8.92695e-81	1.01995e-78
ENSG00000172086	239.031	-3.60211	0.189472	-19.0113	1.37435e-80	1.56394e-78
ENSG00000214313	224.552	2.46057	0.129454	19.0072	1.48549e-80	1.68362e-78
ENSG00000154198	1015.75	-1.50202	0.0791339	-18.9807	2.46187e-80	2.77906e-78
ENSG00000250526	383.168	8.39948	0.442615	18.977	2.64445e-80	2.97327e-78
ENSG00000126878	2819.45	1.31048	0.0691243	18.9583	3.76857e-80	4.22035e-78
ENSG00000099994	217.68	2.37701	0.125607	18.9242	7.20743e-80	8.03957e-78
ENSG00000102057	1189.11	1.16489	0.061563	18.9219	7.52408e-80	8.35973e-78
ENSG00000233328	189.051	6.57779	0.34832	18.8843	1.53526e-79	1.69908e-77
ENSG00000262904	129.844	4.1825	0.221517	18.8812	1.62964e-79	1.79649e-77
ENSG00000213625	1550.65	-1.13443	0.0600937	-18.8776	1.74294e-79	1.91391e-77
ENSG00000213513	145.79	2.95949	0.156903	18.862	2.34279e-79	2.56263e-77
ENSG00000139508	1497.8	-1.41105	0.0749216	-18.8337	3.99696e-79	4.35515e-77
ENSG00000009694	210.574	-5.43617	0.288991	-18.8109	6.14978e-79	6.67511e-77
ENSG00000074370	3119.04	1.40263	0.0746781	18.7824	1.05244e-78	1.13797e-76
ENSG00000165105	1983.12	-1.04652	0.0558635	-18.7335	2.63913e-78	2.84271e-76
ENSG00000064270	793.055	1.35368	0.0723507	18.71	4.10729e-78	4.40729e-76
ENSG00000175197	1378.65	1.33363	0.0714256	18.6715	8.44102e-78	9.02325e-76
ENSG00000278540	9196.75	-0.946907	0.0508049	-18.6381	1.57667e-77	1.67906e-75
ENSG00000134824	1168.69	-1.28193	0.0688012	-18.6323	1.75691e-77	1.86397e-75
ENSG00000151651	750.941	2.16007	0.115964	18.6272	1.93555e-77	2.04581e-75
ENSG00000242265	4649.35	0.93428	0.0502819	18.5809	4.59123e-77	4.83466e-75
ENSG00000186318	2760.85	-0.903265	0.048645	-18.5685	5.77888e-77	6.06267e-75
ENSG00000150556	358.553	-2.51751	0.135675	-18.5554	7.37261e-77	7.70602e-75
ENSG00000072682	2100.48	1.02809	0.0555744	18.4994	2.08897e-76	2.17538e-74
ENSG00000125266	370.763	-2.07609	0.112244	-18.4962	2.21661e-76	2.29982e-74
ENSG00000138639	172.55	2.68314	0.145638	18.4233	8.54306e-76	8.83127e-74
ENSG00000175356	8757.24	0.989314	0.0537016	18.4224	8.68351e-76	8.94369e-74
ENSG00000146648	1038.09	-1.26622	0.0688671	-18.3864	1.68856e-75	1.73283e-73
ENSG00000076864	295.64	1.94074	0.105624	18.374	2.12038e-75	2.16809e-73
ENSG00000165507	139.61	3.07385	0.167613	18.339	4.04176e-75	4.11778e-73
ENSG00000236138	123.811	3.57954	0.195325	18.3261	5.12604e-75	5.20367e-73
ENSG00000156113	2870.02	-0.890019	0.0485911	-18.3165	6.11199e-75	6.18231e-73
ENSG00000124399	314.84	8.11607	0.443461	18.3017	8.02657e-75	8.08993e-73
ENSG00000145246	232.794	-2.36963	0.129487	-18.3002	8.24695e-75	8.28247e-73
ENSG00000197956	7446.5	-1.64101	0.0897992	-18.2742	1.32778e-74	1.32877e-72
ENSG00000131724	1473.97	-1.52854	0.0836484	-18.2734	1.34741e-74	1.34364e-72
ENSG00000227218	374.782	1.64693	0.0901653	18.2657	1.55299e-74	1.5432e-72
ENSG00000198169	1360.14	-1.11438	0.0610167	-18.2635	1.61497e-74	1.59916e-72
ENSG00000189057	3248.02	-1.89383	0.103715	-18.26	1.72283e-74	1.7e-72
ENSG00000102024	2201.22	-1.14641	0.0628278	-18.2469	2.18981e-74	2.15327e-72
ENSG00000273599	542.404	2.10242	0.115393	18.2196	3.60474e-74	3.53227e-72
ENSG00000226332	785.023	1.22729	0.0673809	18.2141	3.98596e-74	3.89231e-72
ENSG00000179387	744.461	-1.64248	0.0902064	-18.208	4.45615e-74	4.33645e-72
ENSG00000137486	2674.1	0.92635	0.0512079	18.09	3.82241e-73	3.70694e-71
ENSG00000142188	1975.56	-1.1658	0.0645749	-18.0534	7.41636e-73	7.16771e-71
ENSG00000213199	810.881	1.27719	0.0707476	18.0528	7.50502e-73	7.22864e-71
ENSG00000168398	210.429	-2.72348	0.151025	-18.0333	1.06692e-72	1.02413e-70
ENSG00000126804	1287.33	-1.37854	0.0764478	-18.0324	1.08431e-72	1.0373e-70
ENSG00000174021	1276.18	-2.2588	0.125323	-18.0238	1.26765e-72	1.2086e-70
ENSG00000114978	3139.2	-1.11109	0.0616664	-18.0178	1.4117e-72	1.3414e-70
ENSG00000137872	169.109	-3.39156	0.188537	-17.9889	2.38225e-72	2.25602e-70
ENSG00000138071	7235.11	-0.904281	0.0503701	-17.9527	4.56726e-72	4.31079e-70
ENSG00000068831	116.749	3.51766	0.195981	17.949	4.88799e-72	4.59814e-70
ENSG00000105281	6156.66	1.09836	0.0611972	17.9479	4.98425e-72	4.67311e-70
ENSG00000156110	2074.06	-1.66975	0.093144	-17.9266	7.31493e-72	6.83559e-70
ENSG00000235823	2161.34	-1.41414	0.0788901	-17.9255	7.46325e-72	6.95117e-70
ENSG00000170017	7152.12	-1.03797	0.0579365	-17.9156	8.91391e-72	8.27498e-70
ENSG00000258289	2084.45	-1.04169	0.0582474	-17.884	1.57239e-71	1.45489e-69
ENSG00000159216	1910.72	2.04208	0.114393	17.8514	2.81972e-71	2.6005e-69
ENSG00000248663	1061.66	1.3465	0.075432	17.8505	2.86224e-71	2.63111e-69
ENSG00000139687	1808.41	-1.18092	0.0661876	-17.842	3.33335e-71	3.05424e-69
ENSG00000167895	294.638	1.84092	0.103239	17.8317	4.01391e-71	3.6659e-69
ENSG00000160183	201.459	2.18373	0.122573	17.8157	5.33769e-71	4.85919e-69
ENSG00000214717	917.956	1.40875	0.0791212	17.8049	6.4697e-71	5.87078e-69
ENSG00000146242	3840.01	0.887177	0.0498451	17.7987	7.23427e-71	6.54353e-69
ENSG00000084733	2268	-1.20018	0.0676131	-17.7508	1.70016e-70	1.53291e-68
ENSG00000279954	157.684	2.95782	0.166685	17.7449	1.88587e-70	1.69494e-68
ENSG00000176463	204.136	-2.52382	0.14233	-17.7322	2.36671e-70	2.12035e-68
ENSG00000096093	2075.52	-1.71654	0.0968751	-17.7191	2.98449e-70	2.66536e-68
ENSG00000134668	1438.45	1.47245	0.0831181	17.7152	3.20098e-70	2.84968e-68
ENSG00000111328	1745.39	-1.00907	0.0569911	-17.7057	3.78814e-70	3.3618e-68
ENSG00000133136	302.872	8.19464	0.464723	17.6334	1.36556e-69	1.20807e-67
ENSG00000006747	204.761	-2.40643	0.136528	-17.6258	1.56015e-69	1.3759e-67
ENSG00000171346	7015.72	1.38543	0.0786398	17.6174	1.81058e-69	1.59179e-67
ENSG00000197847	171.941	2.64746	0.150356	17.608	2.13918e-69	1.87484e-67
ENSG00000126947	207.857	2.09524	0.119025	17.6033	2.32291e-69	2.02956e-67
ENSG00000254363	287.427	-2.0223	0.115001	-17.5851	3.20384e-69	2.79061e-67
ENSG00000173482	365.243	1.62962	0.0927737	17.5656	4.52278e-69	3.9273e-67
ENSG00000144481	213.886	-2.43229	0.138626	-17.5457	6.41369e-69	5.55217e-67
ENSG00000117472	632.21	1.42668	0.0814133	17.5239	9.41483e-69	8.12526e-67
ENSG00000131187	251.01	2.36346	0.134985	17.5091	1.22196e-68	1.05137e-66
ENSG00000031003	1636.18	-1.12701	0.064404	-17.499	1.45724e-68	1.24999e-66
ENSG00000109610	2463.61	-2.59129	0.148086	-17.4985	1.47042e-68	1.25747e-66
ENSG00000092295	220	2.07492	0.118792	17.4669	2.56069e-68	2.18324e-66
ENSG00000126351	1581.64	1.2588	0.0721391	17.4497	3.46213e-68	2.94291e-66
ENSG00000152926	339.424	-2.28515	0.131171	-17.4212	5.69912e-68	4.82988e-66
ENSG00000232630	334.281	2.15158	0.123584	17.4098	6.94692e-68	5.86974e-66
ENSG00000070961	2187.89	-1.18659	0.068192	-17.4007	8.15512e-68	6.87002e-66
ENSG00000153914	3821.34	-1.16211	0.0668388	-17.3868	1.03883e-67	8.72525e-66
ENSG00000177058	779.503	-1.2111	0.0696935	-17.3775	1.22069e-67	1.02223e-65
ENSG00000145794	140.681	-4.79153	0.275787	-17.374	1.29804e-67	1.08378e-65
ENSG00000116171	2518.34	-1.1255	0.0647831	-17.3734	1.31117e-67	1.09152e-65
ENSG00000125848	142.926	-3.42304	0.197041	-17.3722	1.3394e-67	1.11175e-65
ENSG00000185189	3284.38	-1.0671	0.0614367	-17.3691	1.41435e-67	1.17051e-65
ENSG00000129636	1997.63	-1.43882	0.0828526	-17.3661	1.49111e-67	1.23043e-65
ENSG00000135862	6371.49	-0.847397	0.0488172	-17.3586	1.69835e-67	1.39735e-65
ENSG00000112414	2368.61	-1.13022	0.0651842	-17.3388	2.39624e-67	1.96582e-65
ENSG00000185352	389.415	-1.81035	0.104498	-17.3243	3.08669e-67	2.52491e-65
ENSG00000137942	3187.54	-1.03078	0.0595958	-17.2962	5.02518e-67	4.09871e-65
ENSG00000088812	4623.32	-0.772989	0.0446949	-17.2948	5.15047e-67	4.1888e-65
ENSG00000151422	735.48	-1.35248	0.0782585	-17.2822	6.40816e-67	5.19669e-65
ENSG00000120251	220.444	7.4713	0.433297	17.2429	1.26506e-66	1.02296e-64
ENSG00000171714	347.542	-2.13811	0.124036	-17.2378	1.38146e-66	1.11389e-64
ENSG00000011295	1498.69	-1.19537	0.0694589	-17.2098	2.24254e-66	1.80304e-64
ENSG00000139793	977.937	-1.3919	0.080962	-17.192	3.05065e-66	2.44581e-64
ENSG00000163590	969.115	-2.186	0.127178	-17.1885	3.23679e-66	2.58769e-64
ENSG00000108187	995.758	-1.24819	0.0726782	-17.1741	4.14754e-66	3.30643e-64
ENSG00000102174	345.71	-1.8362	0.106957	-17.1676	4.64206e-66	3.69024e-64
ENSG00000196154	587.039	-1.45092	0.0845501	-17.1605	5.24479e-66	4.15768e-64
ENSG00000186088	292.103	-1.82292	0.106231	-17.16	5.29175e-66	4.18315e-64
ENSG00000148484	619.168	-1.77502	0.103468	-17.1553	5.73912e-66	4.52413e-64
ENSG00000174945	3792.83	1.8286	0.106668	17.143	7.09509e-66	5.57746e-64
ENSG00000112893	2538.27	-1.36383	0.079634	-17.1263	9.45272e-66	7.41014e-64
ENSG00000070540	2073.4	1.32231	0.0772898	17.1085	1.28341e-65	1.0033e-63
ENSG00000163053	606.434	1.21844	0.0712574	17.0991	1.50704e-65	1.17487e-63
ENSG00000196663	884.429	-1.20819	0.0706766	-17.0946	1.62789e-65	1.26559e-63
ENSG00000080031	145.149	3.05791	0.178916	17.0913	1.72338e-65	1.33614e-63
ENSG00000116209	5958.06	-1.10456	0.064681	-17.077	2.20179e-65	1.70238e-63
ENSG00000186470	878.842	1.15414	0.0676092	17.0708	2.45017e-65	1.88924e-63
ENSG00000186480	1764.82	-1.41928	0.0831571	-17.0675	2.59083e-65	1.99225e-63
ENSG00000128165	984.398	1.56838	0.091922	17.0621	2.84335e-65	2.18049e-63
ENSG00000089351	1796.78	1.06302	0.0623667	17.0447	3.82794e-65	2.9276e-63
ENSG00000178773	769.707	2.16869	0.127253	17.0424	3.97895e-65	3.03487e-63
ENSG00000224094	146.293	3.71215	0.217835	17.0411	4.06832e-65	3.09466e-63
ENSG00000010327	99.7563	4.19913	0.246459	17.0378	4.30314e-65	3.26449e-63
ENSG00000064042	1065.69	-1.04036	0.0610682	-17.0361	4.43405e-65	3.35478e-63
ENSG00000120925	1198.01	-1.05998	0.062243	-17.0298	4.93992e-65	3.72752e-63
ENSG00000073849	3829.32	-0.956641	0.0562451	-17.0084	7.10989e-65	5.35062e-63
ENSG00000112183	294.65	1.73053	0.101754	17.0069	7.30007e-65	5.47913e-63
ENSG00000196914	12156.3	-0.837362	0.0492534	-17.0011	8.05783e-65	6.03183e-63
ENSG00000130649	120.973	-4.06059	0.23896	-16.9928	9.29255e-65	6.9377e-63
ENSG00000115267	631.929	-1.58315	0.0931769	-16.9908	9.61037e-65	7.15605e-63
ENSG00000230590	937.061	-2.07694	0.122255	-16.9886	9.98244e-65	7.41354e-63
ENSG00000280237	627.606	1.59825	0.0943188	16.9452	2.08918e-64	1.54747e-62
ENSG00000079337	1461.93	1.29502	0.0765832	16.91	3.79954e-64	2.80699e-62
ENSG00000162078	1475.58	1.25058	0.0740343	16.8918	5.16721e-64	3.80741e-62
ENSG00000187017	3056.32	1.25211	0.0741272	16.8914	5.20552e-64	3.82565e-62
ENSG00000142166	2448.43	-0.962729	0.0571249	-16.8531	9.96369e-64	7.30351e-62
ENSG00000175305	1031.09	-1.17739	0.0699307	-16.8365	1.31846e-63	9.63942e-62
ENSG00000157613	98.1796	4.93781	0.293396	16.8299	1.47409e-63	1.07494e-61
ENSG00000136574	95.4595	4.13033	0.245605	16.817	1.8332e-63	1.33337e-61
ENSG00000136158	235.816	2.06546	0.122878	16.8091	2.09427e-63	1.51934e-61
ENSG00000111716	103.737	3.44298	0.204954	16.7988	2.4917e-63	1.80304e-61
ENSG00000197381	1263.36	-1.02774	0.0611914	-16.7955	2.63219e-63	1.89982e-61
ENSG00000170477	646.095	-1.88098	0.112016	-16.7921	2.78773e-63	2.00695e-61
ENSG00000153317	3610.38	-0.821575	0.0489326	-16.7899	2.89207e-63	2.07677e-61
ENSG00000115290	193.671	2.23245	0.133047	16.7794	3.45393e-63	2.47394e-61
ENSG00000175906	577.613	-1.77041	0.105643	-16.7584	4.92059e-63	3.51555e-61
ENSG00000185052	1244.18	-1.19475	0.0713601	-16.7425	6.42524e-63	4.57896e-61
ENSG00000070087	2388.67	-0.944468	0.0565085	-16.7138	1.04071e-62	7.39798e-61
ENSG00000189180	2469.51	-1.20792	0.0722908	-16.7091	1.12437e-62	7.97257e-61
ENSG00000196878	293.614	1.91988	0.11491	16.7077	1.15167e-62	8.14571e-61
ENSG00000114654	126.949	2.82019	0.168961	16.6914	1.51385e-62	1.06806e-60
ENSG00000231426	125.632	-3.92975	0.235578	-16.6813	1.79317e-62	1.26197e-60
ENSG00000114744	1476.12	-0.939385	0.0564021	-16.6551	2.7775e-62	1.94985e-60
ENSG00000157388	1621.54	-1.04426	0.0627013	-16.6545	2.80753e-62	1.96604e-60
ENSG00000204569	4542.94	-0.70999	0.0426952	-16.6293	4.27786e-62	2.98825e-60
ENSG00000090060	6081.09	-1.04197	0.0626593	-16.6291	4.28902e-62	2.98865e-60
ENSG00000154118	98.173	3.46107	0.208196	16.6241	4.66084e-62	3.23974e-60
ENSG00000129521	373.782	-1.92101	0.11586	-16.5805	9.64735e-62	6.68939e-60
ENSG00000196074	4959.17	-1.54632	0.0933183	-16.5703	1.14185e-61	7.8981e-60
ENSG00000213445	1043.81	1.57386	0.0951183	16.5463	1.70273e-61	1.17489e-59
ENSG00000106804	246.037	-2.12468	0.12845	-16.5409	1.86369e-61	1.28281e-59
ENSG00000137812	2139.13	-1.43711	0.0871086	-16.4979	3.79623e-61	2.60363e-59
ENSG00000073584	2316.89	-1.19574	0.0724782	-16.4979	3.80105e-61	2.60363e-59
ENSG00000143369	215.642	1.93218	0.117148	16.4935	4.08844e-61	2.7937e-59
ENSG00000221968	770.318	1.22341	0.0742001	16.488	4.47504e-61	3.05049e-59
ENSG00000014824	2299.45	-1.16631	0.0708139	-16.4701	6.02068e-61	4.09421e-59
ENSG00000272512	207.349	1.99324	0.121066	16.4641	6.64348e-61	4.50686e-59
ENSG00000153936	888.732	-1.66624	0.101249	-16.4569	7.48421e-61	5.06237e-59
ENSG00000184384	325.728	-2.24747	0.136568	-16.4568	7.49821e-61	5.06237e-59
ENSG00000173706	3344.23	-0.831138	0.0505173	-16.4526	8.04082e-61	5.41575e-59
ENSG00000159212	311.969	1.72803	0.105035	16.452	8.11137e-61	5.45026e-59
ENSG00000084636	188.626	2.3052	0.140151	16.448	8.66507e-61	5.80848e-59
ENSG00000171766	315.018	-1.98978	0.121038	-16.4393	1.00054e-60	6.69108e-59
ENSG00000122786	214.739	-3.35717	0.204486	-16.4176	1.4317e-60	9.55175e-59
ENSG00000167766	3062.74	-1.59266	0.0970594	-16.4091	1.64499e-60	1.09489e-58
ENSG00000062725	1417.79	-1.15138	0.070177	-16.4068	1.71061e-60	1.13588e-58
ENSG00000108932	637.76	1.5324	0.0935765	16.3759	2.843e-60	1.88339e-58
ENSG00000131914	1278.7	1.80046	0.109949	16.3753	2.86869e-60	1.89596e-58
ENSG00000165424	605.519	1.37504	0.0840104	16.3675	3.26376e-60	2.15203e-58
ENSG00000156973	349.905	-1.73093	0.105778	-16.3639	3.46259e-60	2.2778e-58
ENSG00000156171	1208.36	-1.57743	0.0964449	-16.3558	3.95691e-60	2.59693e-58
ENSG00000012171	712.973	1.43515	0.0878075	16.3443	4.78014e-60	3.12994e-58
ENSG00000119714	148.219	2.27127	0.138971	16.3435	4.84045e-60	3.16209e-58
ENSG00000279662	600.585	-1.68182	0.103082	-16.3155	7.66233e-60	4.99397e-58
ENSG00000110195	1163.67	1.96352	0.120355	16.3145	7.78928e-60	5.06501e-58
ENSG00000108443	1394.6	-1.00548	0.0616897	-16.2991	1.00222e-59	6.50197e-58
ENSG00000197261	667.443	1.45785	0.0894521	16.2976	1.02645e-59	6.6439e-58
ENSG00000205133	662.074	-1.53699	0.09438	-16.2851	1.25833e-59	8.12616e-58
ENSG00000122042	3347.03	-1.1699	0.0718639	-16.2794	1.38213e-59	8.90527e-58
ENSG00000160182	116.243	2.64144	0.162571	16.2479	2.31012e-59	1.48505e-57
ENSG00000146476	2025.68	-1.04972	0.0646779	-16.23	3.09522e-59	1.98523e-57
ENSG00000182022	1143.26	0.982692	0.0605516	16.229	3.14461e-59	2.01234e-57
ENSG00000110955	42053.8	0.768569	0.047367	16.2258	3.31163e-59	2.11443e-57
ENSG00000136492	668.492	-1.65818	0.102196	-16.2255	3.32883e-59	2.12061e-57
ENSG00000245869	100.7	3.26487	0.201435	16.208	4.42643e-59	2.81347e-57
ENSG00000261888	204.583	2.17115	0.134011	16.2013	4.93854e-59	3.13192e-57
ENSG00000204149	1344.15	-0.961128	0.0593518	-16.1938	5.58161e-59	3.53181e-57
ENSG00000143842	6477.29	-0.996964	0.0615887	-16.1875	6.18356e-59	3.90394e-57
ENSG00000110619	2358.2	1.0409	0.0643437	16.1773	7.29579e-59	4.59586e-57
ENSG00000147044	1033.53	-1.17669	0.0730429	-16.1095	2.18729e-58	1.37478e-56
ENSG00000005020	858.356	-1.26898	0.0789194	-16.0794	3.55647e-58	2.23038e-56
ENSG00000140575	8342.08	-1.00411	0.0624667	-16.0743	3.86464e-58	2.41827e-56
ENSG00000005844	275.182	2.07225	0.129007	16.0631	4.62997e-58	2.89076e-56
ENSG00000120471	147.543	2.26104	0.140899	16.0472	5.97844e-58	3.72445e-56
ENSG00000102265	901.572	1.97292	0.123401	15.9879	1.55297e-57	9.6322e-56
ENSG00000078114	2751.93	-1.12606	0.0704317	-15.988	1.55009e-57	9.6322e-56
ENSG00000102349	1933.4	-1.20707	0.075539	-15.9794	1.77808e-57	1.10042e-55
ENSG00000178295	1371.52	-1.59958	0.100133	-15.9746	1.92014e-57	1.18574e-55
ENSG00000227051	1001.1	-1.30913	0.0819579	-15.9732	1.96489e-57	1.21072e-55
ENSG00000177465	1279.34	1.14399	0.0716444	15.9677	2.14655e-57	1.31978e-55
ENSG00000148735	170.719	2.2867	0.143225	15.9658	2.21162e-57	1.35683e-55
ENSG00000163029	905.561	-1.35484	0.0848781	-15.9622	2.34252e-57	1.43402e-55
ENSG00000145012	2742.39	-1.25042	0.0783754	-15.9542	2.66225e-57	1.62622e-55
ENSG00000084073	2415.14	-1.10241	0.0691426	-15.9439	3.1391e-57	1.91336e-55
ENSG00000236287	2548.6	-1.28541	0.080639	-15.9403	3.3289e-57	2.02467e-55
ENSG00000188710	137.669	2.55312	0.160329	15.9242	4.30341e-57	2.61175e-55
ENSG00000101871	1516.43	-0.91407	0.0574228	-15.9182	4.73651e-57	2.86843e-55
ENSG00000159763	17882.1	2.0184	0.12687	15.9092	5.47283e-57	3.30725e-55
ENSG00000213366	1657.85	-1.04411	0.0656603	-15.9016	6.17409e-57	3.72306e-55
ENSG00000168056	8993.67	0.826236	0.0519767	15.8963	6.72427e-57	4.04618e-55
ENSG00000255622	350.329	-1.49565	0.0940898	-15.896	6.75597e-57	4.0566e-55
ENSG00000138160	4948.32	-0.84057	0.0528898	-15.8928	7.10256e-57	4.25566e-55
ENSG00000047346	3360.59	-1.13806	0.0716164	-15.891	7.30942e-57	4.37032e-55
ENSG00000257354	277.663	-1.66781	0.105043	-15.8775	9.0774e-57	5.41593e-55
ENSG00000280081	1805.53	0.976606	0.0615407	15.8693	1.03442e-56	6.15876e-55
ENSG00000073711	735.092	-1.24303	0.0783795	-15.8591	1.2162e-56	7.22576e-55
ENSG00000115461	39292.7	-0.772363	0.0487061	-15.8576	1.24556e-56	7.38466e-55
ENSG00000164144	1031.85	-1.13344	0.0715449	-15.8424	1.5859e-56	9.38273e-55
ENSG00000185838	268.725	2.291	0.144643	15.839	1.67537e-56	9.89134e-55
ENSG00000172057	3842	-0.791481	0.0499863	-15.834	1.81434e-56	1.06895e-54
ENSG00000198944	1070.11	1.20862	0.076338	15.8325	1.85687e-56	1.09172e-54
ENSG00000182400	1510.3	-1.35024	0.0852858	-15.8319	1.87414e-56	1.09959e-54
ENSG00000149260	481.339	1.37944	0.0871445	15.8293	1.9542e-56	1.14418e-54
ENSG00000244119	130.226	-3.03766	0.192151	-15.8087	2.70916e-56	1.58292e-54
ENSG00000122484	605.859	-1.29797	0.0822032	-15.7898	3.65623e-56	2.13187e-54
ENSG00000164626	135.487	2.58694	0.163864	15.7871	3.81948e-56	2.22247e-54
ENSG00000260565	1141.59	-1.23538	0.078352	-15.767	5.2468e-56	3.0467e-54
ENSG00000158769	4624.97	-0.756121	0.0479765	-15.7602	5.84169e-56	3.38518e-54
ENSG00000179698	254.323	1.90458	0.120855	15.7592	5.93958e-56	3.43485e-54
ENSG00000257093	2947.53	-0.756125	0.047988	-15.7565	6.19282e-56	3.57398e-54
ENSG00000129534	1168	-1.26599	0.0804058	-15.745	7.43741e-56	4.28349e-54
ENSG00000164292	1108.95	-1.23611	0.0785576	-15.7351	8.69356e-56	4.99676e-54
ENSG00000116678	279.728	-2.00747	0.127611	-15.7312	9.24655e-56	5.3038e-54
ENSG00000185168	327.715	1.99166	0.126858	15.6999	1.51528e-55	8.67396e-54
ENSG00000261612	111.938	5.08892	0.324157	15.6989	1.53812e-55	8.78688e-54
ENSG00000139734	1139.68	-1.59555	0.10168	-15.6918	1.72051e-55	9.80897e-54
ENSG00000187079	3050.83	-0.953215	0.0607721	-15.6851	1.91372e-55	1.08885e-53
ENSG00000116005	3399.19	-0.795772	0.0507532	-15.6793	2.09686e-55	1.19065e-53
ENSG00000272888	1124.71	-1.34503	0.0858843	-15.6609	2.79857e-55	1.58591e-53
ENSG00000147862	5254.1	-0.806563	0.0515427	-15.6484	3.40489e-55	1.92564e-53
ENSG00000148842	883.097	1.30118	0.0832499	15.6299	4.55705e-55	2.57209e-53
ENSG00000139211	1994.18	1.18174	0.0756238	15.6265	4.80461e-55	2.7064e-53
ENSG00000138449	14577.8	-1.18654	0.0759463	-15.6234	5.04344e-55	2.83528e-53
ENSG00000180834	556.387	1.59851	0.102402	15.6101	6.21136e-55	3.47799e-53
ENSG00000169084	358.321	-1.88567	0.120798	-15.6102	6.20777e-55	3.47799e-53
ENSG00000159166	1113.72	1.45586	0.0933168	15.6013	7.13081e-55	3.98492e-53
ENSG00000108821	3951.01	1.02442	0.0657234	15.5869	8.93728e-55	4.98456e-53
ENSG00000160712	323.758	1.62154	0.104085	15.5791	1.0097e-54	5.62025e-53
ENSG00000156650	1768.68	0.836731	0.0537497	15.5672	1.21642e-54	6.75759e-53
ENSG00000104419	5890.27	-0.945671	0.0607636	-15.5631	1.29653e-54	7.18846e-53
ENSG00000173621	938.276	1.55999	0.100258	15.5598	1.36592e-54	7.55837e-53
ENSG00000137941	410.841	-1.52981	0.0984551	-15.5381	1.91461e-54	1.05738e-52
ENSG00000137845	3607.41	-0.907751	0.0584246	-15.5371	1.94484e-54	1.07198e-52
ENSG00000214756	411.279	1.53087	0.0985542	15.5333	2.06489e-54	1.13593e-52
ENSG00000011426	7531.04	-1.04572	0.0674441	-15.505	3.21063e-54	1.76279e-52
ENSG00000165802	2132.1	0.982263	0.0633855	15.4967	3.65453e-54	2.00261e-52
ENSG00000061273	7212.03	1.2934	0.083605	15.4704	5.49824e-54	3.00709e-52
ENSG00000163545	254.816	1.92999	0.124871	15.4558	6.89378e-54	3.76305e-52
ENSG00000152818	4261.86	-0.837741	0.0542984	-15.4285	1.05319e-53	5.7374e-52
ENSG00000185432	3142.42	-1.15341	0.0747591	-15.4284	1.05514e-53	5.7374e-52
ENSG00000147459	2140.89	-1.25413	0.0813791	-15.4109	1.38261e-53	7.5036e-52
ENSG00000119943	670.721	1.31276	0.0852673	15.3958	1.7462e-53	9.45866e-52
ENSG00000204624	141.312	2.42429	0.157508	15.3915	1.86601e-53	1.00883e-51
ENSG00000185924	1040.92	1.01795	0.0662708	15.3605	3.0143e-53	1.62651e-51
ENSG00000144935	170.311	-2.68976	0.175114	-15.3601	3.03133e-53	1.63258e-51
ENSG00000135932	1280.57	-1.03697	0.0675649	-15.3478	3.66536e-53	1.97029e-51
ENSG00000186517	358.719	1.56948	0.102276	15.3455	3.79633e-53	2.03681e-51
ENSG00000124762	2517.05	-0.851962	0.0555473	-15.3376	4.28841e-53	2.29645e-51
ENSG00000134255	1303.15	-1.43798	0.093772	-15.3349	4.47021e-53	2.38928e-51
ENSG00000110448	220.599	2.02504	0.132082	15.3317	4.69507e-53	2.50472e-51
ENSG00000143375	4646.19	-0.718352	0.0469333	-15.3058	6.99277e-53	3.72345e-51
ENSG00000259768	458.603	-1.55259	0.101446	-15.3046	7.12309e-53	3.7857e-51
ENSG00000163171	957.882	-1.93769	0.126654	-15.2991	7.75132e-53	4.11184e-51
ENSG00000198691	258.662	1.91725	0.125332	15.2974	7.95857e-53	4.21386e-51
ENSG00000010319	136.421	2.26357	0.147998	15.2946	8.30793e-53	4.3906e-51
ENSG00000182670	14364.3	-0.801575	0.0524166	-15.2924	8.59659e-53	4.53466e-51
ENSG00000224660	537.037	-1.27561	0.0834454	-15.2867	9.37741e-53	4.93731e-51
ENSG00000104154	255.877	-2.22065	0.145431	-15.2694	1.22246e-52	6.4244e-51
ENSG00000134291	9780.8	-0.704448	0.0461579	-15.2617	1.37631e-52	7.21949e-51
ENSG00000197535	2411.12	-0.743986	0.0487684	-15.2555	1.51368e-52	7.92535e-51
ENSG00000168003	9395.59	0.864436	0.0566873	15.2492	1.66673e-52	8.7105e-51
ENSG00000118162	725.595	1.31318	0.0861213	15.248	1.6969e-52	8.85182e-51
ENSG00000228672	1829.63	1.5119	0.0991885	15.2427	1.84008e-52	9.58095e-51
ENSG00000167740	739.092	-1.20902	0.0793282	-15.2407	1.89806e-52	9.86469e-51
ENSG00000184254	254.53	-1.65914	0.108899	-15.2356	2.05189e-52	1.06446e-50
ENSG00000167992	494.613	1.4648	0.096182	15.2294	2.25607e-52	1.16609e-50
ENSG00000100031	772.834	1.0942	0.0718475	15.2295	2.25244e-52	1.16609e-50
ENSG00000121486	1407.97	-1.17424	0.0771269	-15.2248	2.42006e-52	1.24857e-50
ENSG00000261578	225.997	1.92038	0.126139	15.2244	2.43587e-52	1.25443e-50
ENSG00000123143	2537.26	1.13897	0.0748522	15.2162	2.75942e-52	1.41846e-50
ENSG00000186510	79.3957	4.23476	0.278537	15.2036	3.34873e-52	1.71826e-50
ENSG00000186891	171.208	2.34636	0.154446	15.1921	3.98882e-52	2.04299e-50
ENSG00000126562	655.017	1.12657	0.0741611	15.1909	4.06517e-52	2.07832e-50
ENSG00000163141	2757.02	-0.871247	0.0573617	-15.1887	4.20405e-52	2.14543e-50
ENSG00000122741	1183.34	-0.983864	0.0648371	-15.1744	5.22645e-52	2.66238e-50
ENSG00000141519	420.605	-1.45201	0.0957356	-15.1668	5.86401e-52	2.98177e-50
ENSG00000168028	21605.7	0.889852	0.0586735	15.1662	5.92383e-52	3.00677e-50
ENSG00000102316	14924.2	0.842479	0.0555577	15.164	6.11782e-52	3.09966e-50
ENSG00000143127	602.68	1.44518	0.0954148	15.1463	8.01154e-52	4.05186e-50
ENSG00000015532	3167.82	1.12099	0.0741192	15.1242	1.12213e-51	5.66507e-50
ENSG00000047056	1640.62	-0.9557	0.0632891	-15.1005	1.60604e-51	8.09357e-50
ENSG00000109180	2796.92	-1.2276	0.0813792	-15.0849	2.03576e-51	1.02409e-49
ENSG00000111371	17199	-0.777885	0.0516412	-15.0633	2.8247e-51	1.41843e-49
ENSG00000135407	465.058	1.24266	0.0825892	15.0463	3.65159e-51	1.8304e-49
ENSG00000145990	297.294	1.5888	0.10563	15.0411	3.94919e-51	1.97606e-49
ENSG00000136840	257.75	1.86115	0.123781	15.0359	4.27483e-51	2.13522e-49
ENSG00000083642	2646.27	-1.19834	0.0797535	-15.0255	4.99568e-51	2.49087e-49
ENSG00000188549	265.273	1.82081	0.121283	15.013	6.03671e-51	3.00462e-49
ENSG00000224781	76.8879	3.97152	0.264581	15.0106	6.25772e-51	3.10914e-49
ENSG00000250067	1494.13	0.996414	0.0664099	15.004	6.91194e-51	3.42815e-49
ENSG00000164953	696.185	-1.14515	0.0763413	-15.0004	7.29733e-51	3.61295e-49
ENSG00000119801	1215.97	-0.864631	0.057669	-14.993	8.15972e-51	4.03284e-49
ENSG00000131620	996.355	1.02465	0.0683475	14.9918	8.30221e-51	4.09609e-49
ENSG00000139410	803.95	1.29129	0.0861585	14.9874	8.87857e-51	4.37281e-49
ENSG00000070669	1668.59	1.17224	0.078264	14.9781	1.02165e-50	5.02301e-49
ENSG00000149218	1045.48	1.09047	0.0728278	14.9732	1.09858e-50	5.39182e-49
ENSG00000164329	1508.04	-0.995418	0.0665255	-14.9629	1.28219e-50	6.28207e-49
ENSG00000100060	274.751	2.18421	0.145978	14.9626	1.28895e-50	6.30425e-49
ENSG00000170049	516.228	1.30741	0.08743	14.9537	1.47255e-50	7.18977e-49
ENSG00000153037	326.475	-1.47815	0.0988733	-14.9499	1.55937e-50	7.60054e-49
ENSG00000120549	2359.04	-0.990746	0.066314	-14.9402	1.80345e-50	8.77503e-49
ENSG00000163412	614.083	-1.13637	0.0760646	-14.9396	1.82199e-50	8.84998e-49
ENSG00000164237	1453.27	0.982958	0.0658277	14.9323	2.03151e-50	9.85072e-49
ENSG00000204839	1850.04	1.28875	0.086404	14.9154	2.61656e-50	1.26659e-48
ENSG00000171033	148.36	2.37444	0.159259	14.9093	2.86612e-50	1.38501e-48
ENSG00000073969	2758.45	-1.00903	0.0676805	-14.9088	2.89013e-50	1.39423e-48
ENSG00000036672	643.714	1.39666	0.0936881	14.9076	2.94238e-50	1.41701e-48
ENSG00000136631	2574.95	-0.97362	0.0653249	-14.9043	3.09173e-50	1.4864e-48
ENSG00000106688	122.975	-2.91435	0.195618	-14.8982	3.38634e-50	1.62527e-48
ENSG00000100997	2563.02	-0.946626	0.063588	-14.8869	4.0123e-50	1.92243e-48
ENSG00000105048	3017.59	1.26389	0.0850061	14.8682	5.30108e-50	2.53562e-48
ENSG00000066933	1890.57	-1.12017	0.0753587	-14.8645	5.59982e-50	2.67398e-48
ENSG00000147576	440.997	-1.22705	0.0825691	-14.8609	5.90921e-50	2.81696e-48
ENSG00000242498	3609.46	-1.02426	0.0689313	-14.8591	6.07594e-50	2.89155e-48
ENSG00000097046	504.37	-1.37795	0.0927505	-14.8565	6.3115e-50	2.9986e-48
ENSG00000183291	1901.54	-0.97763	0.0658311	-14.8506	6.89571e-50	3.27065e-48
ENSG00000185630	13059	-0.774534	0.0521766	-14.8445	7.55456e-50	3.57713e-48
ENSG00000135424	478.655	1.65533	0.111539	14.8409	7.97304e-50	3.76896e-48
ENSG00000122711	83.6793	5.03888	0.339549	14.8399	8.08472e-50	3.81537e-48
ENSG00000106692	2281.2	-1.01306	0.0682733	-14.8382	8.28997e-50	3.9057e-48
ENSG00000197599	286.161	1.79715	0.121144	14.8348	8.72866e-50	4.10552e-48
ENSG00000165996	266.865	-1.69453	0.114299	-14.8255	1.0027e-49	4.70836e-48
ENSG00000050130	2414.76	-0.995678	0.0671927	-14.8183	1.11644e-49	5.23371e-48
ENSG00000078140	2347.52	-0.918579	0.0619949	-14.817	1.13743e-49	5.32329e-48
ENSG00000276966	215.083	1.8596	0.12566	14.7987	1.49352e-49	6.97824e-48
ENSG00000171320	674.207	-1.59676	0.108009	-14.7836	1.8684e-49	8.71541e-48
ENSG00000204843	3199.06	0.97496	0.065975	14.7777	2.03975e-49	9.49895e-48
ENSG00000108797	380.392	1.332	0.0903378	14.7446	3.33181e-49	1.54904e-47
ENSG00000101846	200.366	-1.86388	0.126491	-14.7353	3.82332e-49	1.77464e-47
ENSG00000164171	1389.03	-0.824802	0.056002	-14.7281	4.25515e-49	1.97183e-47
ENSG00000173991	153.139	2.28536	0.155216	14.7237	4.53978e-49	2.10028e-47
ENSG00000186376	247.49	-1.63501	0.111124	-14.7134	5.28917e-49	2.44297e-47
ENSG00000249915	4715.18	-0.734968	0.0499691	-14.7085	5.68923e-49	2.62346e-47
ENSG00000196517	710.108	1.13951	0.0774825	14.7067	5.84117e-49	2.68475e-47
ENSG00000126561	285.119	1.56155	0.106179	14.7067	5.83806e-49	2.68475e-47
ENSG00000034677	1623.19	-1.16934	0.0795375	-14.7017	6.28659e-49	2.88478e-47
ENSG00000136731	3911.44	-0.697196	0.0474309	-14.6992	6.52383e-49	2.98878e-47
ENSG00000171236	77.4764	4.18024	0.284419	14.6975	6.69059e-49	3.06021e-47
ENSG00000136444	2222.68	0.787866	0.0536753	14.6784	8.87015e-49	4.05056e-47
ENSG00000181788	3021.98	1.09165	0.0743927	14.6741	9.44727e-49	4.30713e-47
ENSG00000124920	454.973	1.49299	0.101781	14.6686	1.0245e-48	4.66329e-47
ENSG00000260284	109.474	2.89666	0.19755	14.6629	1.11377e-48	5.06148e-47
ENSG00000177054	433.505	-1.29219	0.0881606	-14.6572	1.21116e-48	5.49518e-47
ENSG00000153006	565.089	-1.34052	0.0914982	-14.6508	1.33231e-48	6.03518e-47
ENSG00000134533	853.059	1.21445	0.0829563	14.6396	1.57056e-48	7.103e-47
ENSG00000124942	93596.5	-0.686145	0.0468749	-14.6378	1.61249e-48	7.28096e-47
ENSG00000163873	2154.86	-0.970061	0.0662814	-14.6355	1.66749e-48	7.51728e-47
ENSG00000183010	3811.89	1.10778	0.0757001	14.6338	1.71049e-48	7.69883e-47
ENSG00000149231	154.575	-2.29208	0.156682	-14.6289	1.83754e-48	8.25752e-47
ENSG00000135842	3234.9	0.848389	0.0580115	14.6245	1.96036e-48	8.79543e-47
ENSG00000149599	278.984	1.67734	0.114873	14.6016	2.74183e-48	1.22821e-46
ENSG00000131374	2956.21	-0.845578	0.05793	-14.5966	2.95385e-48	1.32109e-46
ENSG00000186642	82.8341	5.62777	0.385767	14.5885	3.32386e-48	1.48422e-46
ENSG00000198879	781.96	1.1145	0.0764036	14.5871	3.3954e-48	1.51377e-46
ENSG00000237438	1026.07	-0.960826	0.0658702	-14.5867	3.41475e-48	1.51999e-46
ENSG00000102580	2939.87	-0.82148	0.0563214	-14.5856	3.46891e-48	1.54167e-46
ENSG00000278041	269.743	1.81687	0.124635	14.5776	3.9027e-48	1.73173e-46
ENSG00000196924	26595.8	1.06568	0.0731329	14.5718	4.24388e-48	1.88017e-46
ENSG00000203879	5511.86	1.01465	0.0696496	14.5679	4.49645e-48	1.98894e-46
ENSG00000132549	2968.58	-1.04339	0.0716423	-14.5639	4.76554e-48	2.10467e-46
ENSG00000151150	1927.68	-1.14519	0.0786778	-14.5555	5.38928e-48	2.37642e-46
ENSG00000263235	201.898	1.7379	0.119427	14.552	5.67255e-48	2.49742e-46
ENSG00000137672	81.7907	3.28632	0.2259	14.5477	6.04075e-48	2.65539e-46
ENSG00000099769	89.103	2.68915	0.184968	14.5385	6.91088e-48	3.03316e-46
ENSG00000180773	478.683	-1.5449	0.106309	-14.5322	7.57691e-48	3.32031e-46
ENSG00000090530	111.807	-2.76844	0.190632	-14.5224	8.73868e-48	3.82348e-46
ENSG00000067715	534.111	-1.45929	0.100697	-14.4918	1.36514e-47	5.96371e-46
ENSG00000159200	5627.38	-1.07584	0.0742848	-14.4826	1.56049e-47	6.80658e-46
ENSG00000170469	485.564	1.35522	0.0935877	14.4808	1.60248e-47	6.97897e-46
ENSG00000169604	328.603	-1.93626	0.133716	-14.4804	1.61235e-47	7.01109e-46
ENSG00000075884	188.369	-2.69409	0.186103	-14.4764	1.70857e-47	7.4181e-46
ENSG00000143153	2987.76	-1.21788	0.0842911	-14.4485	2.56051e-47	1.10999e-45
ENSG00000198420	1830.62	-0.796211	0.0551263	-14.4434	2.75862e-47	1.19403e-45
ENSG00000110031	200.721	-1.77695	0.123166	-14.4273	3.48604e-47	1.50658e-45
ENSG00000230989	4990.98	-1.02841	0.0712842	-14.4269	3.50621e-47	1.51298e-45
ENSG00000137203	5780.53	-0.79359	0.0550676	-14.4112	4.39984e-47	1.89569e-45
ENSG00000145725	1532.35	-1.00703	0.0699972	-14.3867	6.27334e-47	2.69878e-45
ENSG00000136826	494.415	1.34459	0.0934643	14.3862	6.31924e-47	2.71439e-45
ENSG00000196776	2784.38	-1.11328	0.0774011	-14.3832	6.59483e-47	2.82846e-45
ENSG00000121068	376.68	1.40401	0.0976759	14.3742	7.51277e-47	3.21727e-45
ENSG00000085276	491.389	-1.31859	0.091844	-14.3569	9.64826e-47	4.12551e-45
ENSG00000164168	1281.6	-0.811027	0.0564979	-14.355	9.91556e-47	4.23339e-45
ENSG00000185436	447.746	1.5882	0.110695	14.3476	1.1036e-46	4.70463e-45
ENSG00000254285	1798.48	-1.34845	0.0940276	-14.341	1.21279e-46	5.16231e-45
ENSG00000213073	265.805	1.70244	0.118803	14.33	1.422e-46	6.04372e-45
ENSG00000144061	228.159	-1.69613	0.118373	-14.3287	1.44791e-46	6.14456e-45
ENSG00000105245	1136.84	1.00078	0.0699417	14.3088	1.928e-46	8.16968e-45
ENSG00000198162	1598.28	-0.935825	0.0654164	-14.3057	2.01695e-46	8.53377e-45
ENSG00000213463	2416.37	-0.869848	0.0608236	-14.3012	2.15193e-46	9.09128e-45
ENSG00000140675	74.8551	3.5745	0.250002	14.2979	2.25543e-46	9.51428e-45
ENSG00000137414	1640.83	-0.928954	0.0649891	-14.294	2.38515e-46	1.00465e-44
ENSG00000259291	458.299	-1.39048	0.0973847	-14.2782	2.99173e-46	1.25826e-44
ENSG00000106948	634.787	1.30287	0.0912579	14.2768	3.05519e-46	1.28304e-44
ENSG00000123219	729.313	-1.73686	0.121722	-14.2691	3.40907e-46	1.42953e-44
ENSG00000165156	2401	-0.835306	0.0586006	-14.2542	4.22003e-46	1.76697e-44
ENSG00000138698	573.261	-1.36435	0.0957579	-14.248	4.61632e-46	1.93003e-44
ENSG00000106780	1396.48	-0.811169	0.0569479	-14.2441	4.88063e-46	2.03752e-44
ENSG00000174485	1034.77	-1.05403	0.0740124	-14.2412	5.08531e-46	2.11983e-44
ENSG00000215105	509.185	1.23936	0.0870524	14.237	5.40263e-46	2.24878e-44
ENSG00000146918	2497.94	-0.751823	0.0528095	-14.2365	5.43688e-46	2.25971e-44
ENSG00000091536	229.374	1.79942	0.12642	14.2337	5.65934e-46	2.34871e-44
ENSG00000163807	1663.31	-0.775553	0.054492	-14.2324	5.76572e-46	2.38934e-44
ENSG00000166575	1923.67	-1.45765	0.102449	-14.228	6.14239e-46	2.54171e-44
ENSG00000077147	10503.8	-1.11268	0.0782912	-14.2121	7.71075e-46	3.18602e-44
ENSG00000102144	12947.3	-0.740049	0.0521426	-14.1928	1.01535e-45	4.18919e-44
ENSG00000214530	5507.95	1.10302	0.0778215	14.1737	1.33218e-45	5.48838e-44
ENSG00000138760	4317.03	-0.865219	0.0612133	-14.1345	2.32855e-45	9.57928e-44
ENSG00000225402	91.2251	6.18802	0.437813	14.134	2.34596e-45	9.63688e-44
ENSG00000101974	336.531	-1.48873	0.105358	-14.1302	2.47463e-45	1.01507e-43
ENSG00000181260	75.1805	5.4812	0.388048	14.1251	2.66123e-45	1.09002e-43
ENSG00000196684	167.194	1.87502	0.132759	14.1236	2.7191e-45	1.11211e-43
ENSG00000102996	753.873	1.40138	0.0992645	14.1176	2.95797e-45	1.20806e-43
ENSG00000234420	1431.62	-1.08327	0.0768157	-14.1021	3.68493e-45	1.50278e-43
ENSG00000011258	1033.17	-1.13954	0.0808166	-14.1004	3.77829e-45	1.53863e-43
ENSG00000143771	1999.07	-1.02376	0.0726246	-14.0966	3.98735e-45	1.62142e-43
ENSG00000162368	1269.01	-1.24468	0.0883654	-14.0856	4.65899e-45	1.89182e-43
ENSG00000152518	3439.67	-1.01301	0.0720012	-14.0693	5.86357e-45	2.37753e-43
ENSG00000254122	206.539	1.77379	0.126113	14.0651	6.22499e-45	2.52045e-43
ENSG00000135698	2186.17	-1.44249	0.102579	-14.0623	6.47443e-45	2.61769e-43
ENSG00000279117	1070.05	1.21003	0.086061	14.0601	6.68036e-45	2.69709e-43
ENSG00000128791	912.006	-1.42341	0.101327	-14.0478	7.95013e-45	3.20515e-43
ENSG00000161243	293.434	1.33047	0.0947384	14.0436	8.43109e-45	3.39421e-43
ENSG00000169220	459.534	1.22326	0.0871399	14.0378	9.14547e-45	3.67656e-43
ENSG00000167207	344.383	1.82511	0.130035	14.0355	9.44971e-45	3.79346e-43
ENSG00000015171	4294.49	-0.775986	0.0553023	-14.0317	9.97373e-45	3.99814e-43
ENSG00000123992	2215.62	0.877801	0.0626122	14.0197	1.18194e-44	4.7313e-43
ENSG00000158850	3297.48	0.746487	0.0533	14.0054	1.44522e-44	5.77698e-43
ENSG00000169851	113.238	-2.67412	0.190967	-14.003	1.49385e-44	5.96292e-43
ENSG00000053770	1285.79	-0.977878	0.069848	-14.0001	1.55691e-44	6.20587e-43
ENSG00000228224	63.528	4.05705	0.289919	13.9937	1.70216e-44	6.77525e-43
ENSG00000257621	1986.39	-1.20771	0.0863194	-13.9911	1.76611e-44	7.01993e-43
ENSG00000105953	5229.95	0.754705	0.0539683	13.9842	1.94566e-44	7.72273e-43
ENSG00000198835	63.4889	4.10089	0.293268	13.9834	1.96759e-44	7.7988e-43
ENSG00000215915	496.21	1.48173	0.105965	13.9833	1.97228e-44	7.80642e-43
ENSG00000067167	4888.39	-1.47312	0.105356	-13.9823	2.00011e-44	7.90548e-43
ENSG00000182199	7997.84	0.917735	0.0656363	13.9821	2.00412e-44	7.91025e-43
ENSG00000005810	2128.51	-0.811481	0.0580773	-13.9724	2.29627e-44	9.0507e-43
ENSG00000158555	872.652	1.37706	0.0985714	13.9701	2.37171e-44	9.33499e-43
ENSG00000018408	1573.08	-0.924509	0.0662124	-13.9628	2.62934e-44	1.03346e-42
ENSG00000127946	4019.54	0.70078	0.0501921	13.962	2.65987e-44	1.04401e-42
ENSG00000071967	1840.17	-0.996653	0.0713868	-13.9613	2.68461e-44	1.05226e-42
ENSG00000228630	1594.56	-0.903183	0.0647069	-13.9581	2.80953e-44	1.09969e-42
ENSG00000170540	8151.25	-1.27622	0.0914436	-13.9564	2.877e-44	1.12454e-42
ENSG00000227008	70.2003	3.32707	0.238497	13.9501	3.14027e-44	1.22575e-42
ENSG00000006576	2597.15	-1.0436	0.0748266	-13.9469	3.28461e-44	1.28032e-42
ENSG00000253741	82.5089	2.69498	0.193278	13.9436	3.44168e-44	1.33969e-42
ENSG00000100092	549.968	1.08025	0.077478	13.9426	3.48906e-44	1.35626e-42
ENSG00000152558	6572.04	-1.06064	0.0761495	-13.9283	4.26205e-44	1.65446e-42
ENSG00000085224	1706.31	-1.08523	0.0779364	-13.9245	4.49538e-44	1.74264e-42
ENSG00000112972	3123.05	-0.907486	0.0651833	-13.9221	4.65322e-44	1.80135e-42
ENSG00000166685	2276.82	0.770984	0.0554318	13.9087	5.61032e-44	2.16889e-42
ENSG00000184012	2503.48	-0.87869	0.0631994	-13.9035	6.03454e-44	2.3297e-42
ENSG00000153531	741.194	0.983187	0.070775	13.8917	7.11012e-44	2.74119e-42
ENSG00000115129	6897.94	0.775476	0.0558262	13.8909	7.19275e-44	2.76926e-42
ENSG00000163435	4580.64	-1.1033	0.079555	-13.8684	9.83819e-44	3.77756e-42
ENSG00000107099	261.743	-1.66581	0.120115	-13.8684	9.83844e-44	3.77756e-42
ENSG00000174695	3436.1	-1.29433	0.0933466	-13.8658	1.02014e-43	3.91162e-42
ENSG00000259881	484.862	2.01199	0.14512	13.8644	1.04165e-43	3.98865e-42
ENSG00000145623	2307.26	-0.806131	0.0581785	-13.8562	1.16744e-43	4.46428e-42
ENSG00000145198	882.163	1.1553	0.083401	13.8524	1.2309e-43	4.70059e-42
ENSG00000153832	169.232	-1.98697	0.143537	-13.8429	1.40437e-43	5.35576e-42
ENSG00000167994	163.784	2.50282	0.180947	13.8318	1.63915e-43	6.24271e-42
ENSG00000071991	80.1396	-3.64253	0.26339	-13.8294	1.69412e-43	6.44336e-42
ENSG00000170421	212201	-1.09474	0.07921	-13.8207	1.91135e-43	7.25978e-42
ENSG00000137310	3512.15	-0.771696	0.0558394	-13.8199	1.93239e-43	7.32982e-42
ENSG00000159658	4170.23	-0.696102	0.0504108	-13.8086	2.26194e-43	8.56835e-42
ENSG00000198919	1151.73	-1.0932	0.0791687	-13.8085	2.26648e-43	8.57404e-42
ENSG00000077782	1027.27	-1.11459	0.0807399	-13.8047	2.38635e-43	9.01542e-42
ENSG00000160293	1214.2	0.818299	0.0593431	13.7893	2.95683e-43	1.11557e-41
ENSG00000228507	72.7485	5.34695	0.387955	13.7824	3.25178e-43	1.22521e-41
ENSG00000141497	378.206	-1.41996	0.10312	-13.77	3.86156e-43	1.45303e-41
ENSG00000197937	637.312	-1.1809	0.0857803	-13.7665	4.05117e-43	1.52234e-41
ENSG00000119227	283.061	-1.81303	0.131774	-13.7586	4.52147e-43	1.69681e-41
ENSG00000184557	85.259	2.69406	0.195813	13.7583	4.53772e-43	1.70065e-41
ENSG00000099812	1571.86	1.17135	0.0852324	13.7431	5.60581e-43	2.09816e-41
ENSG00000085719	6072.45	-0.778194	0.0566306	-13.7416	5.72183e-43	2.13875e-41
ENSG00000157181	2141.04	-1.04921	0.0764347	-13.7269	7.00475e-43	2.61483e-41
ENSG00000182628	1886.61	-1.13937	0.0830105	-13.7256	7.13196e-43	2.6588e-41
ENSG00000211891	79.7585	2.78761	0.203184	13.7196	7.74866e-43	2.8849e-41
ENSG00000143457	1216.88	-0.947025	0.0690386	-13.7173	7.9956e-43	2.97291e-41
ENSG00000205269	519.392	-1.96597	0.14333	-13.7164	8.09799e-43	3.00702e-41
ENSG00000151233	2176.39	-1.13352	0.082641	-13.7162	8.11933e-43	3.01098e-41
ENSG00000122376	1365.83	-1.15093	0.0839179	-13.715	8.25787e-43	3.05834e-41
ENSG00000206195	412.135	-1.28402	0.0936619	-13.7091	8.95402e-43	3.31181e-41
ENSG00000227203	118.857	6.98908	0.510016	13.7037	9.65355e-43	3.56588e-41
ENSG00000182324	216.246	1.81609	0.132627	13.6932	1.11436e-42	4.11088e-41
ENSG00000137801	4313.08	0.772973	0.056461	13.6904	1.15865e-42	4.26871e-41
ENSG00000165891	979.118	-1.18906	0.0868624	-13.689	1.18161e-42	4.34761e-41
ENSG00000132386	422.99	-1.35971	0.0993856	-13.6812	1.31548e-42	4.83389e-41
ENSG00000049245	2373.89	-0.833572	0.0609362	-13.6794	1.34764e-42	4.94561e-41
ENSG00000111728	190.943	1.58951	0.116324	13.6644	1.65623e-42	6.0702e-41
ENSG00000140416	10984.7	-1.45315	0.106367	-13.6616	1.72053e-42	6.29768e-41
ENSG00000175115	2995.73	-0.900841	0.0659765	-13.654	1.91145e-42	6.98743e-41
ENSG00000140950	942.002	-0.884176	0.0647639	-13.6523	1.9564e-42	7.14252e-41
ENSG00000136010	694.596	1.07494	0.07875	13.6501	2.01653e-42	7.35252e-41
ENSG00000004478	21103	1.25818	0.0921811	13.649	2.04586e-42	7.44985e-41
ENSG00000101856	1593.33	-0.786255	0.057621	-13.6453	2.15369e-42	7.83237e-41
ENSG00000197757	859.668	1.01922	0.0747098	13.6424	2.23922e-42	8.13294e-41
ENSG00000178202	3270.75	-0.699896	0.0513071	-13.6413	2.27411e-42	8.24904e-41
ENSG00000153558	395.466	-1.30091	0.095367	-13.6411	2.28052e-42	8.26169e-41
ENSG00000110318	555.935	-1.20077	0.0880295	-13.6406	2.29691e-42	8.31038e-41
ENSG00000110492	2898.83	1.81401	0.133012	13.6379	2.38167e-42	8.60604e-41
ENSG00000173762	60.5845	4.49975	0.329946	13.6379	2.38483e-42	8.60644e-41
ENSG00000196220	1266.44	0.905968	0.0665025	13.6231	2.92033e-42	1.05255e-40
ENSG00000149573	1343.5	-1.19263	0.0875727	-13.6188	3.0972e-42	1.11487e-40
ENSG00000124160	2677.92	0.663277	0.0487062	13.6179	3.13383e-42	1.12662e-40
ENSG00000197405	103.86	2.5008	0.18389	13.5994	4.03626e-42	1.4492e-40
ENSG00000165685	295.598	-1.42406	0.104718	-13.599	4.05836e-42	1.45528e-40
ENSG00000151366	583.739	-2.28679	0.168183	-13.597	4.17129e-42	1.49388e-40
ENSG00000117298	3821.22	0.827428	0.0608661	13.5942	4.33253e-42	1.54966e-40
ENSG00000273203	81.7005	-3.2555	0.239495	-13.5932	4.39582e-42	1.57031e-40
ENSG00000184083	957.988	-1.51022	0.11118	-13.5836	5.00749e-42	1.78655e-40
ENSG00000204396	104.404	2.4121	0.177599	13.5817	5.13907e-42	1.83118e-40
ENSG00000143341	159.123	1.81592	0.133772	13.5747	5.65471e-42	2.01238e-40
ENSG00000236548	79.1484	-3.96747	0.292277	-13.5743	5.68461e-42	2.02047e-40
ENSG00000174640	163.323	-2.16579	0.159628	-13.5677	6.22047e-42	2.20815e-40
ENSG00000170745	1024.92	1.04235	0.076949	13.546	8.36368e-42	2.96522e-40
ENSG00000197299	522.426	-1.30723	0.0965219	-13.5433	8.67656e-42	3.07228e-40
ENSG00000133138	251.605	-1.50006	0.110773	-13.5417	8.87618e-42	3.13903e-40
ENSG00000140534	1894.03	-0.780886	0.0576816	-13.5379	9.34684e-42	3.30134e-40
ENSG00000116584	4527.6	0.629234	0.0464854	13.5362	9.56325e-42	3.37356e-40
ENSG00000105388	65.3177	3.28779	0.242972	13.5316	1.0178e-41	3.58592e-40
ENSG00000174177	1261.66	1.22256	0.0903506	13.5313	1.02261e-41	3.59837e-40
ENSG00000255014	139.043	7.58023	0.560309	13.5287	1.05913e-41	3.72225e-40
ENSG00000143036	235.404	-1.62402	0.12009	-13.5233	1.13889e-41	3.9976e-40
ENSG00000115648	15621.8	0.696737	0.0515418	13.5179	1.22633e-41	4.29916e-40
ENSG00000136717	142.535	1.89622	0.140305	13.515	1.27624e-41	4.4686e-40
ENSG00000138162	2339.36	0.808914	0.0598598	13.5135	1.30245e-41	4.55472e-40
ENSG00000142856	412.81	-1.24587	0.0922363	-13.5074	1.41388e-41	4.93826e-40
ENSG00000068079	1025.86	0.950463	0.0703993	13.501	1.54222e-41	5.37986e-40
ENSG00000230091	192.459	-1.80525	0.13376	-13.4961	1.64782e-41	5.74114e-40
ENSG00000125531	62.4212	3.6863	0.273178	13.4941	1.69386e-41	5.89425e-40
ENSG00000141668	7550.96	0.792932	0.0587733	13.4914	1.75833e-41	6.11108e-40
ENSG00000122912	1934.63	-1.31221	0.0972679	-13.4907	1.77412e-41	6.15836e-40
ENSG00000121966	301.06	1.24602	0.09238	13.488	1.84118e-41	6.38329e-40
ENSG00000141756	1900.2	0.78164	0.0579867	13.4797	2.06074e-41	7.13572e-40
ENSG00000188177	307.078	-1.84918	0.137204	-13.4776	2.1185e-41	7.32675e-40
ENSG00000116237	3602.71	-0.855607	0.0634963	-13.4749	2.19795e-41	7.59221e-40
ENSG00000144036	787.08	-1.04618	0.0777028	-13.4638	2.55375e-41	8.81045e-40
ENSG00000009413	1467.49	-0.916962	0.0681195	-13.4611	2.6498e-41	9.13065e-40
ENSG00000260916	511.794	-1.24079	0.0922121	-13.4558	2.84582e-41	9.79414e-40
ENSG00000001461	4028.42	-0.689461	0.0512411	-13.4552	2.86859e-41	9.86049e-40
ENSG00000059769	612.333	1.32306	0.098431	13.4415	3.4545e-41	1.186e-39
ENSG00000047932	737.976	-1.1194	0.0833208	-13.4348	3.78054e-41	1.29636e-39
ENSG00000179148	314.254	1.34633	0.100253	13.4294	4.06801e-41	1.39325e-39
ENSG00000140961	1728.97	1.11373	0.0829455	13.4273	4.18671e-41	1.43216e-39
ENSG00000164096	2046.41	-1.15597	0.0860979	-13.4263	4.24219e-41	1.44938e-39
ENSG00000113758	2567.21	0.968573	0.0721797	13.4189	4.68521e-41	1.59881e-39
ENSG00000151229	188.211	-2.00772	0.149729	-13.409	5.35457e-41	1.82502e-39
ENSG00000070413	2439.29	-1.10076	0.0821992	-13.3914	6.7925e-41	2.31232e-39
ENSG00000126005	1553.61	-1.54623	0.115533	-13.3835	7.55448e-41	2.56861e-39
ENSG00000187951	934.317	-0.950903	0.071052	-13.3832	7.58135e-41	2.57465e-39
ENSG00000092421	755.092	1.49282	0.111736	13.3602	1.03263e-40	3.50264e-39
ENSG00000105376	282.107	1.84458	0.138079	13.3589	1.05159e-40	3.56267e-39
ENSG00000260793	309.96	-1.45386	0.108922	-13.3477	1.22177e-40	4.13425e-39
ENSG00000085377	1234.91	-0.964922	0.0723054	-13.3451	1.26527e-40	4.27633e-39
ENSG00000153395	6308.57	-0.939905	0.0704637	-13.3389	1.37551e-40	4.64333e-39
ENSG00000114279	100.493	-3.15254	0.236371	-13.3372	1.40589e-40	4.74023e-39
ENSG00000049167	366.816	-1.31707	0.098772	-13.3344	1.46009e-40	4.9171e-39
ENSG00000116852	93.0218	2.51956	0.189106	13.3235	1.68931e-40	5.68225e-39
ENSG00000049323	4748.07	-0.833391	0.0625556	-13.3224	1.71497e-40	5.7617e-39
ENSG00000162415	113.801	-2.27225	0.17068	-13.313	1.94581e-40	6.52944e-39
ENSG00000204385	90.9482	2.60472	0.195675	13.3115	1.98568e-40	6.65534e-39
ENSG00000102362	430.269	1.15193	0.0865473	13.3098	2.03027e-40	6.79672e-39
ENSG00000170271	162.408	1.82169	0.136938	13.3031	2.2217e-40	7.42876e-39
ENSG00000166886	1366.27	0.903453	0.0679295	13.2999	2.31902e-40	7.74499e-39
ENSG00000105983	1266.7	-1.0481	0.0788129	-13.2985	2.36054e-40	7.87432e-39
ENSG00000140525	4324.56	-1.1077	0.0832983	-13.298	2.37737e-40	7.92111e-39
ENSG00000136052	784.331	-1.05265	0.0791675	-13.2964	2.42807e-40	8.08048e-39
ENSG00000073536	1287.87	0.96323	0.0724446	13.2961	2.43891e-40	8.10702e-39
ENSG00000256464	70.1706	5.67919	0.427328	13.29	2.64566e-40	8.78389e-39
ENSG00000074964	1144.72	1.09735	0.0825775	13.2887	2.691e-40	8.92394e-39
ENSG00000160932	6386.68	1.12322	0.0845315	13.2876	2.73144e-40	9.04742e-39
ENSG00000090447	263.678	1.34597	0.101328	13.2832	2.89568e-40	9.58018e-39
ENSG00000069869	1403.92	-0.731378	0.0550639	-13.2823	2.93082e-40	9.6851e-39
ENSG00000120963	2056.56	-0.941504	0.0709165	-13.2762	3.17995e-40	1.04961e-38
ENSG00000113161	3709.31	-0.850863	0.0641537	-13.2629	3.79966e-40	1.25269e-38
ENSG00000232593	848.136	-1.22563	0.0924299	-13.2601	3.94618e-40	1.29948e-38
ENSG00000114054	2509.38	0.774398	0.0584324	13.2529	4.34128e-40	1.42792e-38
ENSG00000188211	499.692	1.19053	0.0898642	13.2481	4.62847e-40	1.52061e-38
ENSG00000092964	650.628	-0.987263	0.0747233	-13.2122	7.45679e-40	2.44695e-38
ENSG00000182054	11377.6	-0.73888	0.0559295	-13.2109	7.5895e-40	2.48761e-38
ENSG00000135211	457.862	-1.14175	0.0864279	-13.2105	7.63588e-40	2.49991e-38
ENSG00000139910	93.212	2.91388	0.220632	13.207	7.99613e-40	2.61482e-38
ENSG00000169891	790.347	-1.18471	0.0897149	-13.2053	8.17744e-40	2.66792e-38
ENSG00000175061	2976.58	0.707948	0.0536106	13.2054	8.16972e-40	2.66792e-38
ENSG00000105641	67.0682	3.46769	0.262765	13.1969	9.1385e-40	2.97803e-38
ENSG00000162607	1707.51	-1.11493	0.0845167	-13.1918	9.78247e-40	3.18421e-38
ENSG00000198947	248.705	1.63263	0.123769	13.1909	9.90198e-40	3.2194e-38
ENSG00000196268	676.329	-1.62059	0.122875	-13.189	1.0155e-39	3.29787e-38
ENSG00000269516	88.8194	2.49719	0.189449	13.1814	1.12332e-39	3.64382e-38
ENSG00000225138	579.939	-1.49339	0.113302	-13.1806	1.13557e-39	3.67932e-38
ENSG00000137699	341.957	-1.80322	0.136816	-13.1799	1.14551e-39	3.70727e-38
ENSG00000172602	423.937	1.25573	0.0953939	13.1637	1.42037e-39	4.59156e-38
ENSG00000179918	5163.28	0.745155	0.0566347	13.1572	1.54665e-39	4.99404e-38
ENSG00000161642	7596.1	1.40606	0.106945	13.1476	1.75771e-39	5.66907e-38
ENSG00000103489	329.557	-1.87211	0.142402	-13.1467	1.77804e-39	5.7281e-38
ENSG00000168907	1272.51	0.781301	0.0594692	13.1379	1.99624e-39	6.4237e-38
ENSG00000153246	522.387	-1.1709	0.0891467	-13.1345	2.08803e-39	6.71144e-38
ENSG00000160285	5834.89	-1.17831	0.0897412	-13.1301	2.21387e-39	7.1078e-38
ENSG00000204217	1826.7	-1.48208	0.112942	-13.1225	2.44685e-39	7.84687e-38
ENSG00000092621	3163.89	0.883413	0.0673688	13.1131	2.77074e-39	8.87549e-38
ENSG00000159674	118.706	2.16298	0.164962	13.112	2.81021e-39	8.99171e-38
ENSG00000181218	501.669	1.45123	0.110704	13.1091	2.92085e-39	9.33516e-38
ENSG00000149591	1738.75	1.60228	0.122283	13.103	3.16324e-39	1.00984e-37
ENSG00000158290	2846.69	-1.07179	0.081828	-13.0981	3.37774e-39	1.0771e-37
ENSG00000171208	94.4039	-2.66912	0.203918	-13.0892	3.79681e-39	1.20937e-37
ENSG00000272462	254.477	1.51692	0.115948	13.0828	4.13009e-39	1.31404e-37
ENSG00000076716	130.713	-1.95616	0.14956	-13.0795	4.31347e-39	1.37084e-37
ENSG00000228716	2445.13	-1.00249	0.0766967	-13.0708	4.83244e-39	1.53404e-37
ENSG00000154654	6358.65	-1.1151	0.0853368	-13.0671	5.07673e-39	1.60978e-37
ENSG00000133316	1402.61	0.989326	0.0757422	13.0618	5.44515e-39	1.72466e-37
ENSG00000169962	186.871	2.08443	0.159649	13.0563	5.84734e-39	1.84997e-37
ENSG00000116032	85.8693	2.51035	0.192442	13.0447	6.81314e-39	2.15312e-37
ENSG00000129993	2449.73	0.799716	0.0613295	13.0397	7.27721e-39	2.2972e-37
ENSG00000116133	47820.2	-0.718548	0.0551473	-13.0296	8.30225e-39	2.61785e-37
ENSG00000168938	1153.58	-0.954424	0.0732717	-13.0258	8.72516e-39	2.74813e-37
ENSG00000135052	3643.51	0.970647	0.0745248	13.0245	8.88017e-39	2.79384e-37
ENSG00000184560	56.6962	4.72963	0.363266	13.0198	9.4475e-39	2.96902e-37
ENSG00000165521	95.3358	-2.47253	0.189923	-13.0186	9.58798e-39	3.00981e-37
ENSG00000101333	1727.09	-0.773031	0.0594066	-13.0125	1.0383e-38	3.25575e-37
ENSG00000228412	186.054	-1.86927	0.143659	-13.0119	1.0476e-38	3.28127e-37
ENSG00000168916	1142.45	0.903039	0.0694705	12.9989	1.24128e-38	3.88362e-37
ENSG00000028277	71.9129	3.09328	0.238157	12.9884	1.42382e-38	4.44979e-37
ENSG00000144306	540.081	-1.09702	0.0844765	-12.9861	1.4677e-38	4.58187e-37
ENSG00000102893	2147.17	-0.925142	0.0712878	-12.9776	1.64015e-38	5.11456e-37
ENSG00000088035	559.496	-1.17538	0.0906101	-12.9718	1.76839e-38	5.50835e-37
ENSG00000112697	4309.06	-1.28368	0.098983	-12.9687	1.84099e-38	5.72818e-37
ENSG00000143614	2275.24	-0.829157	0.0640322	-12.9491	2.3782e-38	7.38445e-37
ENSG00000100505	175.534	-1.74188	0.134518	-12.9491	2.37853e-38	7.38445e-37
ENSG00000101442	729.054	0.8805	0.0680035	12.9479	2.41573e-38	7.49168e-37
ENSG00000271525	180.799	8.45161	0.65303	12.9422	2.6023e-38	8.06143e-37
ENSG00000119535	61.6224	3.72452	0.287802	12.9412	2.63324e-38	8.14833e-37
ENSG00000122483	246.432	-1.50699	0.116461	-12.9398	2.68189e-38	8.28978e-37
ENSG00000130363	524.711	-0.980059	0.0758303	-12.9244	3.27972e-38	1.01266e-36
ENSG00000186814	513.914	-1.03688	0.0802474	-12.9211	3.42291e-38	1.05572e-36
ENSG00000169180	5425.12	0.633595	0.0490459	12.9184	3.54382e-38	1.09181e-36
ENSG00000134897	493.275	-1.23383	0.095549	-12.9131	3.79774e-38	1.16877e-36
ENSG00000168300	1022.28	-1.33899	0.103716	-12.9101	3.94593e-38	1.21305e-36
ENSG00000058085	265.756	-1.47732	0.114454	-12.9076	4.07975e-38	1.25283e-36
ENSG00000134375	2065.63	-0.676105	0.0524111	-12.9	4.49896e-38	1.38006e-36
ENSG00000162819	2749.23	-1.00247	0.0777652	-12.891	5.05613e-38	1.54928e-36
ENSG00000166012	3798.55	0.933837	0.0724751	12.8849	5.47231e-38	1.67499e-36
ENSG00000139644	49500.3	-0.831662	0.0645852	-12.877	6.06601e-38	1.8547e-36
ENSG00000118855	2320.8	-0.828878	0.0643939	-12.872	6.47003e-38	1.97609e-36
ENSG00000215440	570.699	-1.17036	0.0909651	-12.866	6.99395e-38	2.1338e-36
ENSG00000177697	4753.69	-0.836858	0.0650818	-12.8586	7.7006e-38	2.34685e-36
ENSG00000150967	1227.49	1.11388	0.086627	12.8583	7.72451e-38	2.3516e-36
ENSG00000071082	9372.99	0.929941	0.0723611	12.8514	8.44738e-38	2.5689e-36
ENSG00000206417	126.958	1.86404	0.145059	12.8502	8.57919e-38	2.60617e-36
ENSG00000131171	808.448	-1.29218	0.100613	-12.8431	9.4088e-38	2.85512e-36
ENSG00000157064	186.298	-1.81138	0.141068	-12.8405	9.72922e-38	2.94918e-36
ENSG00000076351	305.186	1.21243	0.0944706	12.8339	1.05889e-37	3.20631e-36
ENSG00000155085	194.842	-1.94014	0.151176	-12.8336	1.06254e-37	3.21394e-36
ENSG00000117318	1593.26	-1.11656	0.0870148	-12.8319	1.08703e-37	3.28449e-36
ENSG00000143384	8175.35	-0.556913	0.0434059	-12.8304	1.10861e-37	3.34612e-36
ENSG00000171016	165.396	-2.15583	0.168033	-12.8298	1.11649e-37	3.36628e-36
ENSG00000171747	127.019	2.07493	0.161769	12.8265	1.1653e-37	3.50971e-36
ENSG00000139915	115.782	-2.28868	0.178465	-12.8242	1.19942e-37	3.60861e-36
ENSG00000157514	1213.2	-0.81626	0.0636508	-12.824	1.20283e-37	3.61503e-36
ENSG00000159399	1546.86	0.859373	0.0670541	12.8161	1.33198e-37	3.99891e-36
ENSG00000066468	3025.12	-0.624931	0.0487669	-12.8147	1.35744e-37	4.07101e-36
ENSG00000126773	2548.05	-0.856345	0.0668498	-12.81	1.44133e-37	4.31803e-36
ENSG00000080200	1544.03	-0.904994	0.0706595	-12.8078	1.48263e-37	4.43705e-36
ENSG00000158467	617.317	-1.02569	0.0801074	-12.804	1.55726e-37	4.65544e-36
ENSG00000167588	552.938	1.0029	0.0783471	12.8007	1.62533e-37	4.85379e-36
ENSG00000250539	201.668	1.54621	0.120823	12.7973	1.69786e-37	5.06505e-36
ENSG00000125629	471.981	-1.22711	0.0959152	-12.7937	1.77876e-37	5.30077e-36
ENSG00000143476	2553.5	-0.778807	0.0608802	-12.7924	1.80709e-37	5.37953e-36
ENSG00000163083	5223.46	-0.746436	0.0583595	-12.7903	1.85717e-37	5.52279e-36
ENSG00000180730	343.566	-1.92382	0.150457	-12.7865	1.95091e-37	5.79543e-36
ENSG00000136021	5524.52	-0.743135	0.0581444	-12.7809	2.09733e-37	6.22384e-36
ENSG00000008735	269.388	1.64451	0.128694	12.7784	2.16364e-37	6.41386e-36
ENSG00000124343	899.386	-1.19663	0.0936646	-12.7757	2.24091e-37	6.63595e-36
ENSG00000125871	1997.35	-0.935318	0.0732163	-12.7747	2.2695e-37	6.71359e-36
ENSG00000198208	825.815	0.883086	0.0691308	12.7741	2.2868e-37	6.75768e-36
ENSG00000172818	236.267	1.76909	0.138556	12.7681	2.47197e-37	7.29722e-36
ENSG00000064651	763.024	-1.21512	0.0953045	-12.7499	3.12248e-37	9.2079e-36
ENSG00000103540	1910.15	-0.817955	0.0641733	-12.746	3.28021e-37	9.66293e-36
ENSG00000168062	169.299	1.69246	0.132809	12.7436	3.38455e-37	9.95989e-36
ENSG00000167100	63.3002	3.05029	0.239456	12.7384	3.61586e-37	1.06295e-35
ENSG00000186907	236.885	1.84638	0.144987	12.7348	3.78674e-37	1.11202e-35
ENSG00000163898	716.096	-1.0723	0.0842035	-12.7347	3.7949e-37	1.11326e-35
ENSG00000012660	5641.89	-0.664785	0.0522246	-12.7293	4.06307e-37	1.19069e-35
ENSG00000113494	60663.6	-0.981804	0.0771596	-12.7243	4.33189e-37	1.26816e-35
ENSG00000175920	224.993	2.14061	0.168243	12.7233	4.38644e-37	1.28279e-35
ENSG00000170270	242.014	-1.81764	0.142901	-12.7196	4.60417e-37	1.34508e-35
ENSG00000133135	80.5722	-3.0046	0.236265	-12.7171	4.75443e-37	1.38754e-35
ENSG00000117519	7980.36	-0.969529	0.0762461	-12.7158	4.83196e-37	1.40871e-35
ENSG00000248971	64.2487	2.97641	0.234199	12.7089	5.27631e-37	1.53666e-35
ENSG00000123136	3404.91	0.697715	0.0549301	12.7019	5.7741e-37	1.6799e-35
ENSG00000183067	107.292	2.01873	0.159026	12.6943	6.35808e-37	1.8479e-35
ENSG00000125107	8915.4	-0.708901	0.0558738	-12.6875	6.93247e-37	2.01277e-35
ENSG00000180573	776.496	-1.02267	0.0806131	-12.6861	7.05806e-37	2.04713e-35
ENSG00000204516	2408.53	0.722394	0.0569844	12.6771	7.92564e-37	2.2964e-35
ENSG00000156453	4642.35	0.907202	0.0715677	12.6761	8.01761e-37	2.32067e-35
ENSG00000048052	93.9961	-2.51695	0.198595	-12.6738	8.2646e-37	2.38971e-35
ENSG00000153551	358.306	1.36107	0.107402	12.6727	8.38208e-37	2.42119e-35
ENSG00000154217	340.807	-1.65088	0.130355	-12.6645	9.30117e-37	2.68393e-35
ENSG00000090339	245.996	1.73353	0.136883	12.6643	9.32189e-37	2.68716e-35
ENSG00000166402	406.242	-1.43944	0.113681	-12.6621	9.59333e-37	2.76259e-35
ENSG00000064199	199.124	-1.9266	0.152264	-12.6531	1.07571e-36	3.09455e-35
ENSG00000228486	200.77	-1.84145	0.145829	-12.6274	1.49068e-36	4.28397e-35
ENSG00000160208	2505.6	0.74132	0.0588095	12.6054	1.97084e-36	5.65809e-35
ENSG00000095059	1832.04	0.701356	0.0556487	12.6033	2.02533e-36	5.80862e-35
ENSG00000187240	1577.48	-1.00291	0.0795925	-12.6006	2.09587e-36	6.00483e-35
ENSG00000183255	8695.98	-0.600491	0.0476645	-12.5983	2.15778e-36	6.17593e-35
ENSG00000107819	2306.18	0.613044	0.0487096	12.5857	2.5308e-36	7.23624e-35
ENSG00000143622	1421.5	-0.818294	0.0650197	-12.5853	2.54288e-36	7.26341e-35
ENSG00000105227	432.511	1.27659	0.101456	12.5827	2.63007e-36	7.50486e-35
ENSG00000215114	1749.78	-0.872536	0.0695376	-12.5477	4.09301e-36	1.16676e-34
ENSG00000228118	450.101	10.5084	0.837488	12.5475	4.10082e-36	1.1678e-34
ENSG00000124406	933.918	-1.49185	0.118923	-12.5447	4.25236e-36	1.20974e-34
ENSG00000115325	193.521	1.68375	0.134419	12.5261	5.37104e-36	1.52645e-34
ENSG00000164576	1358.72	-0.749311	0.0598237	-12.5253	5.42718e-36	1.54085e-34
ENSG00000152582	943.789	-1.07155	0.0855776	-12.5214	5.70017e-36	1.61673e-34
ENSG00000114670	189.517	-2.01982	0.161356	-12.5178	5.96421e-36	1.68992e-34
ENSG00000114529	689.54	0.956064	0.0763769	12.5177	5.97364e-36	1.69089e-34
ENSG00000114473	1268.41	-1.10144	0.0880238	-12.5129	6.3429e-36	1.79362e-34
ENSG00000269343	727.279	1.25998	0.100762	12.5044	7.0601e-36	1.99442e-34
ENSG00000147676	4626.02	-1.00585	0.0805861	-12.4817	9.39136e-36	2.65033e-34
ENSG00000240376	59.2555	3.23243	0.258985	12.4812	9.46043e-36	2.66716e-34
ENSG00000184500	67.5514	-3.49667	0.280175	-12.4803	9.56109e-36	2.69285e-34
ENSG00000139514	3147.79	0.773783	0.06206	12.4683	1.1118e-35	3.12823e-34
ENSG00000006282	3768.7	0.951485	0.076329	12.4656	1.15023e-35	3.23314e-34
ENSG00000185808	442.396	-1.11924	0.0899073	-12.4488	1.41946e-35	3.98592e-34
ENSG00000161905	228.918	1.3588	0.10916	12.4478	1.43799e-35	4.03396e-34
ENSG00000072195	511.929	1.14695	0.0921957	12.4403	1.57827e-35	4.42307e-34
ENSG00000067992	635.966	1.01422	0.0815967	12.4296	1.80496e-35	5.05336e-34
ENSG00000087253	104.625	-2.46611	0.198416	-12.429	1.81856e-35	5.08638e-34
ENSG00000104980	1317.27	0.927512	0.0746753	12.4206	2.02043e-35	5.6454e-34
ENSG00000077044	1156.97	0.784604	0.0632017	12.4143	2.18667e-35	6.10385e-34
ENSG00000104899	1860.22	1.25757	0.101435	12.3977	2.68778e-35	7.49525e-34
ENSG00000170689	58.3902	3.06098	0.246997	12.3928	2.86054e-35	7.96913e-34
ENSG00000130598	692.007	1.35113	0.109089	12.3856	3.12753e-35	8.70435e-34
ENSG00000117335	15290	-1.03331	0.0834451	-12.3831	3.22729e-35	8.97313e-34
ENSG00000164114	739.435	-1.27184	0.102723	-12.3812	3.30426e-35	9.17811e-34
ENSG00000160961	824.074	1.36327	0.110225	12.3681	3.89102e-35	1.07973e-33
ENSG00000153993	73.6682	-2.88628	0.233443	-12.364	4.0938e-35	1.13488e-33
ENSG00000235162	263.724	-1.61308	0.130533	-12.3576	4.4306e-35	1.22705e-33
ENSG00000260942	398.581	1.23859	0.100232	12.3572	4.45155e-35	1.23163e-33
ENSG00000023041	921.615	-0.817051	0.0661196	-12.3572	4.45588e-35	1.23163e-33
ENSG00000115738	815.014	-1.18858	0.0962123	-12.3538	4.64793e-35	1.28346e-33
ENSG00000132746	3702.02	0.879061	0.0711841	12.3491	4.92416e-35	1.3584e-33
ENSG00000118873	3095.89	-0.593065	0.0480333	-12.347	5.05828e-35	1.39404e-33
ENSG00000169684	377.913	-1.3304	0.107774	-12.3443	5.2255e-35	1.43872e-33
ENSG00000129951	148.114	2.06275	0.167168	12.3394	5.55703e-35	1.52851e-33
ENSG00000005893	3082.96	-0.869751	0.0704953	-12.3377	5.6742e-35	1.55922e-33
ENSG00000071553	11109.3	0.677353	0.0549019	12.3375	5.68925e-35	1.56183e-33
ENSG00000103269	680.051	1.48704	0.120578	12.3326	6.04957e-35	1.65914e-33
ENSG00000128228	826.817	0.971228	0.0788109	12.3235	6.76724e-35	1.85416e-33
ENSG00000125868	20866.2	-1.03318	0.0839057	-12.3136	7.65093e-35	2.09425e-33
ENSG00000047365	1139.83	-0.87663	0.0711951	-12.3131	7.70409e-35	2.10676e-33
ENSG00000118094	53.7226	3.62941	0.294887	12.3078	8.22583e-35	2.24725e-33
ENSG00000258469	48.1131	3.8186	0.310424	12.3012	8.92016e-35	2.43458e-33
ENSG00000156052	1412.8	-0.729185	0.0592846	-12.2997	9.08642e-35	2.47756e-33
ENSG00000109332	4973.53	-0.658018	0.0535068	-12.2978	9.30263e-35	2.53407e-33
ENSG00000114405	439.863	-1.66727	0.135595	-12.296	9.51334e-35	2.58897e-33
ENSG00000116990	292.682	1.26227	0.102676	12.2937	9.79125e-35	2.66203e-33
ENSG00000104047	465.044	-1.15204	0.0938606	-12.274	1.24934e-34	3.39342e-33
ENSG00000176623	1974.26	-0.843114	0.0687054	-12.2714	1.28951e-34	3.49916e-33
ENSG00000259129	100.185	-2.6834	0.218776	-12.2655	1.38688e-34	3.75975e-33
ENSG00000158623	1099.67	-0.935372	0.076263	-12.2651	1.39478e-34	3.77756e-33
ENSG00000085063	7227.58	-0.650434	0.0530379	-12.2636	1.42103e-34	3.84496e-33
ENSG00000104881	5758.66	-0.780242	0.063668	-12.2549	1.58218e-34	4.27689e-33
ENSG00000170293	325.165	1.40494	0.114648	12.2544	1.59181e-34	4.29879e-33
ENSG00000162104	2601.41	0.70893	0.0578568	12.2532	1.61536e-34	4.35824e-33
ENSG00000138190	947.804	-0.961124	0.0784798	-12.2468	1.74832e-34	4.71244e-33
ENSG00000019582	555.464	1.28229	0.104712	12.2458	1.76883e-34	4.76319e-33
ENSG00000124302	69.0531	2.9938	0.244529	12.2431	1.82848e-34	4.91913e-33
ENSG00000276691	102.019	1.99436	0.16301	12.2346	2.02982e-34	5.45557e-33
ENSG00000007516	955.832	1.11198	0.0909152	12.2309	2.12472e-34	5.7052e-33
ENSG00000103018	2691.55	-0.644851	0.0527388	-12.2273	2.22323e-34	5.96405e-33
ENSG00000133739	902.319	-1.48626	0.121641	-12.2184	2.47931e-34	6.64469e-33
ENSG00000250133	465.676	1.00259	0.0820787	12.215	2.58426e-34	6.9194e-33
ENSG00000154760	1740.64	-0.937522	0.0767795	-12.2106	2.72942e-34	7.30114e-33
ENSG00000204305	667.871	0.939342	0.0769332	12.2098	2.75426e-34	7.3606e-33
ENSG00000155974	134.678	-1.8909	0.154876	-12.2092	2.7777e-34	7.41622e-33
ENSG00000148339	601.506	1.14376	0.093748	12.2003	3.09592e-34	8.25804e-33
ENSG00000179455	123.374	1.73716	0.142527	12.1883	3.58777e-34	9.56095e-33
ENSG00000101220	615.686	1.45466	0.119386	12.1845	3.75722e-34	1.00031e-32
ENSG00000172915	391.514	-1.2122	0.0994901	-12.1841	3.77657e-34	1.00451e-32
ENSG00000184058	156.179	1.99484	0.163814	12.1775	4.09847e-34	1.0891e-32
ENSG00000113739	31539	0.831107	0.0682652	12.1747	4.24064e-34	1.12582e-32
ENSG00000101000	171.239	1.55813	0.128011	12.1718	4.39157e-34	1.1648e-32
ENSG00000148730	5852.47	-0.57623	0.0473632	-12.1662	4.70519e-34	1.24681e-32
ENSG00000186635	2187.51	0.714665	0.0588251	12.149	5.80905e-34	1.53787e-32
ENSG00000253873	232.62	1.57272	0.129461	12.1482	5.86155e-34	1.55032e-32
ENSG00000058804	3812.02	-0.733915	0.0604291	-12.1451	6.09384e-34	1.61025e-32
ENSG00000130479	1026.75	1.11279	0.0916409	12.143	6.24939e-34	1.6498e-32
ENSG00000196976	869.217	1.04012	0.0856856	12.1388	6.58152e-34	1.73586e-32
ENSG00000169884	180.475	1.44964	0.119485	12.1325	7.10862e-34	1.87313e-32
ENSG00000179348	1477.3	0.934151	0.0769984	12.1321	7.14205e-34	1.88018e-32
ENSG00000275481	151.745	1.76886	0.145827	12.1299	7.33731e-34	1.92979e-32
ENSG00000164414	618.241	-1.28264	0.105747	-12.1293	7.38777e-34	1.94125e-32
ENSG00000234614	105.674	1.86496	0.153786	12.127	7.59954e-34	1.99504e-32
ENSG00000106025	122.093	1.84581	0.152293	12.1201	8.26612e-34	2.16801e-32
ENSG00000144224	4152.58	-0.749133	0.0618284	-12.1163	8.65407e-34	2.26766e-32
ENSG00000156802	8530.83	-0.759207	0.0626802	-12.1124	9.08013e-34	2.37709e-32
ENSG00000100078	107.657	1.98408	0.163885	12.1066	9.74882e-34	2.54978e-32
ENSG00000198911	6272.08	-0.75902	0.0627038	-12.1048	9.95669e-34	2.60174e-32
ENSG00000069275	18250.1	-0.897442	0.0741564	-12.102	1.03064e-33	2.69062e-32
ENSG00000256269	1791.14	0.677588	0.0560173	12.0961	1.10799e-33	2.8899e-32
ENSG00000163527	6381.28	-0.923178	0.07636	-12.0898	1.19558e-33	3.11547e-32
ENSG00000186951	615.901	-0.950737	0.0786433	-12.0892	1.20418e-33	3.13498e-32
ENSG00000198089	1620.77	-1.13531	0.0939612	-12.0828	1.30238e-33	3.38751e-32
ENSG00000179912	1243.48	-1.11402	0.0922121	-12.081	1.33074e-33	3.45809e-32
ENSG00000134830	1084.22	1.02238	0.0846655	12.0756	1.42198e-33	3.69178e-32
ENSG00000101236	775.923	-0.804084	0.0665944	-12.0744	1.44292e-33	3.7427e-32
ENSG00000040341	1358.28	-0.795192	0.065879	-12.0705	1.51231e-33	3.91909e-32
ENSG00000148488	239.665	-1.42896	0.118396	-12.0693	1.53362e-33	3.97066e-32
ENSG00000149090	63.3805	-3.52663	0.292359	-12.0627	1.66293e-33	4.30151e-32
ENSG00000196440	156.213	1.75722	0.145706	12.06	1.7177e-33	4.43911e-32
ENSG00000273464	76.8062	-3.09473	0.256689	-12.0563	1.79598e-33	4.63717e-32
ENSG00000163104	1108.28	-0.955495	0.0792698	-12.0537	1.85431e-33	4.78341e-32
ENSG00000214018	53.8211	3.47615	0.288601	12.0448	2.06486e-33	5.32169e-32
ENSG00000145390	3943.22	-0.754191	0.0626247	-12.043	2.11054e-33	5.43446e-32
ENSG00000175414	62.367	2.83381	0.235312	12.0428	2.11744e-33	5.44725e-32
ENSG00000168575	1503.24	-0.646564	0.0536906	-12.0424	2.12621e-33	5.46482e-32
ENSG00000124226	9281.73	-0.714804	0.0593579	-12.0423	2.12998e-33	5.46954e-32
ENSG00000162650	386.581	1.09975	0.0913532	12.0384	2.23167e-33	5.72546e-32
ENSG00000142002	2067.74	0.777217	0.0646333	12.025	2.62506e-33	6.7286e-32
ENSG00000165516	2135.89	-0.752646	0.0625912	-12.0248	2.63292e-33	6.74261e-32
ENSG00000129673	92.4313	1.9686	0.16372	12.0242	2.65143e-33	6.78387e-32
ENSG00000104756	1019.92	-0.724153	0.0602299	-12.0231	2.68574e-33	6.86542e-32
ENSG00000104549	3458.1	-1.03671	0.0862358	-12.0218	2.72889e-33	6.9694e-32
ENSG00000103253	725.507	1.24554	0.103609	12.0216	2.73735e-33	6.98469e-32
ENSG00000186594	417.979	-1.01692	0.0846033	-12.0198	2.7961e-33	7.12816e-32
ENSG00000248498	157.074	1.77436	0.147632	12.0188	2.82944e-33	7.20665e-32
ENSG00000230316	98.88	1.91141	0.159059	12.017	2.89319e-33	7.36237e-32
ENSG00000168078	951.266	-0.814986	0.0678257	-12.0159	2.93254e-33	7.45577e-32
ENSG00000259581	50.3689	4.00201	0.3331	12.0144	2.98471e-33	7.5816e-32
ENSG00000167693	566.271	-0.991892	0.0825738	-12.0122	3.06653e-33	7.78243e-32
ENSG00000224420	322.596	1.87378	0.156067	12.0062	3.29678e-33	8.35925e-32
ENSG00000074219	1495.95	0.68326	0.0569593	11.9956	3.74773e-33	9.49413e-32
ENSG00000102030	668.202	0.865499	0.072216	11.9849	4.26517e-33	1.07953e-31
ENSG00000139974	236.508	-1.74347	0.145492	-11.9833	4.34771e-33	1.09943e-31
ENSG00000149798	283.18	1.38563	0.115635	11.9828	4.37039e-33	1.10418e-31
ENSG00000167106	6319.79	0.737618	0.0615589	11.9823	4.39891e-33	1.11039e-31
ENSG00000144029	1791.83	1.03749	0.086628	11.9764	4.72366e-33	1.1913e-31
ENSG00000167851	73.4333	6.46132	0.539512	11.9762	4.73426e-33	1.19291e-31
ENSG00000259972	253.827	-1.55517	0.12988	-11.9739	4.8708e-33	1.22622e-31
ENSG00000142875	411.425	-1.35776	0.113411	-11.972	4.97865e-33	1.25225e-31
ENSG00000059573	4304.36	0.551059	0.0460475	11.9672	5.27816e-33	1.3264e-31
ENSG00000260316	49.8016	4.77783	0.399454	11.9609	5.69354e-33	1.42951e-31
ENSG00000249661	49.5379	4.86612	0.406908	11.9588	5.84316e-33	1.46578e-31
ENSG00000175766	105.346	1.8606	0.15562	11.956	6.03676e-33	1.513e-31
ENSG00000258056	331.173	1.15776	0.0968574	11.9532	6.24668e-33	1.56422e-31
ENSG00000121005	548	-1.05647	0.0884067	-11.9501	6.48311e-33	1.62198e-31
ENSG00000077721	2038.49	-0.693337	0.058026	-11.9487	6.59176e-33	1.64771e-31
ENSG00000282511	46.0704	4.5731	0.382951	11.9417	7.17061e-33	1.79081e-31
ENSG00000141627	1094.44	-0.863953	0.072358	-11.94	7.324e-33	1.8275e-31
ENSG00000183856	7263.1	-0.695573	0.0582583	-11.9395	7.36955e-33	1.83724e-31
ENSG00000272335	111.449	-2.54045	0.21285	-11.9354	7.73715e-33	1.92719e-31
ENSG00000143353	534.367	-1.31265	0.10999	-11.9343	7.83826e-33	1.95065e-31
ENSG00000231770	585.9	0.909393	0.0762005	11.9342	7.84997e-33	1.95184e-31
ENSG00000129654	152.804	-1.62836	0.136454	-11.9334	7.93069e-33	1.97018e-31
ENSG00000184731	685.737	-0.883097	0.0740675	-11.9229	8.99534e-33	2.23269e-31
ENSG00000152952	4480.47	-0.819434	0.0687912	-11.9119	1.0262e-32	2.54485e-31
ENSG00000070388	96.6944	1.97921	0.166217	11.9074	1.08358e-32	2.68479e-31
ENSG00000122417	394.842	-1.21432	0.102065	-11.8975	1.21909e-32	3.01788e-31
ENSG00000075426	1169.74	0.695117	0.0584294	11.8967	1.23139e-32	3.04567e-31
ENSG00000172869	1951.17	-1.10314	0.0927438	-11.8945	1.26406e-32	3.12373e-31
ENSG00000197385	305.166	1.23659	0.103967	11.8941	1.26998e-32	3.13562e-31
ENSG00000213614	423.217	0.973006	0.0818088	11.8937	1.27692e-32	3.15e-31
ENSG00000107771	1548.44	-0.690991	0.0581198	-11.8891	1.34875e-32	3.32428e-31
ENSG00000164070	992.002	-0.98168	0.0826145	-11.8827	1.45661e-32	3.587e-31
ENSG00000253797	955.394	-0.858033	0.0722447	-11.8768	1.56312e-32	3.84594e-31
ENSG00000103494	465.583	-1.14165	0.0961497	-11.8736	1.62266e-32	3.98894e-31
ENSG00000106665	430.017	1.28017	0.10782	11.8732	1.63044e-32	4.00458e-31
ENSG00000103415	1744.31	0.932798	0.0786146	11.8655	1.78902e-32	4.39026e-31
ENSG00000121579	5243.37	-0.77185	0.0650619	-11.8633	1.83526e-32	4.49981e-31
ENSG00000143147	349.91	-1.14294	0.0963543	-11.8619	1.86769e-32	4.57536e-31
ENSG00000196296	524.019	1.06907	0.0901405	11.86	1.90961e-32	4.67398e-31
ENSG00000173281	782.037	0.8832	0.0744779	11.8585	1.9432e-32	4.75209e-31
ENSG00000171206	4106.67	1.03377	0.0872339	11.8505	2.13889e-32	5.22612e-31
ENSG00000230069	60.2598	2.81561	0.237611	11.8497	2.1605e-32	5.27435e-31
ENSG00000162994	131.798	-2.16477	0.18269	-11.8494	2.16746e-32	5.28678e-31
ENSG00000168928	49.6382	4.38475	0.370157	11.8456	2.26687e-32	5.52448e-31
ENSG00000151466	232.858	-1.45003	0.122438	-11.843	2.33948e-32	5.69649e-31
ENSG00000117407	511.958	1.08496	0.0916465	11.8385	2.46796e-32	6.00415e-31
ENSG00000242028	548.146	1.07339	0.0906884	11.836	2.54322e-32	6.18192e-31
ENSG00000147883	569.966	-1.0724	0.0906248	-11.8334	2.62177e-32	6.36739e-31
ENSG00000206530	981.175	-1.05882	0.0894973	-11.8308	2.70549e-32	6.56505e-31
ENSG00000172382	450.206	-0.935171	0.07908	-11.8256	2.87711e-32	6.97552e-31
ENSG00000173209	2823.39	-0.807133	0.0682609	-11.8242	2.92529e-32	7.08624e-31
ENSG00000052841	6807.05	-0.901206	0.076218	-11.8241	2.93162e-32	7.09548e-31
ENSG00000105968	4669.33	-0.586863	0.0496388	-11.8227	2.98011e-32	7.20666e-31
ENSG00000113805	118.125	-1.92123	0.162547	-11.8195	3.09413e-32	7.47598e-31
ENSG00000007237	217.069	-1.49129	0.126196	-11.8173	3.17894e-32	7.67433e-31
ENSG00000105643	461.615	0.960155	0.0812721	11.8141	3.30176e-32	7.96402e-31
ENSG00000156103	62.023	-4.09946	0.347171	-11.8082	3.54235e-32	8.53703e-31
ENSG00000006451	2696.29	-0.789889	0.0669169	-11.804	3.71993e-32	8.95735e-31
ENSG00000165863	115.022	1.75013	0.148269	11.8038	3.73187e-32	8.97845e-31
ENSG00000138653	56.476	-3.76567	0.319263	-11.7949	4.14784e-32	9.97071e-31
ENSG00000182220	6620.18	-0.733985	0.0622301	-11.7947	4.15678e-32	9.9837e-31
ENSG00000144320	1191.89	-0.961269	0.0815369	-11.7894	4.4283e-32	1.06268e-30
ENSG00000079308	230.75	1.32524	0.112452	11.785	4.66594e-32	1.11876e-30
ENSG00000161267	3854.05	0.532745	0.0452241	11.7801	4.94302e-32	1.18419e-30
ENSG00000129946	288.377	1.38569	0.11768	11.775	5.25251e-32	1.25726e-30
ENSG00000162923	11777.7	-0.672959	0.0571536	-11.7746	5.27947e-32	1.26264e-30
ENSG00000068885	848.755	-1.27255	0.108079	-11.7743	5.29421e-32	1.2651e-30
ENSG00000113456	1116.5	-0.764317	0.064936	-11.7703	5.55206e-32	1.32559e-30
ENSG00000130164	2222.62	-0.719664	0.0611541	-11.768	5.70379e-32	1.36067e-30
ENSG00000196407	90.1386	2.14303	0.182124	11.7668	5.78489e-32	1.37885e-30
ENSG00000168216	750.689	-1.05553	0.0898348	-11.7497	7.08474e-32	1.68724e-30
ENSG00000175602	454.324	1.41875	0.120758	11.7487	7.1677e-32	1.70556e-30
ENSG00000122952	6038.17	-0.63629	0.0541778	-11.7445	7.53876e-32	1.79235e-30
ENSG00000249346	47.6449	4.9	0.417247	11.7437	7.61239e-32	1.80761e-30
ENSG00000104324	599.542	-1.26013	0.107304	-11.7436	7.61578e-32	1.80761e-30
ENSG00000115457	4897.28	1.11264	0.0947952	11.7374	8.2011e-32	1.9449e-30
ENSG00000205413	393.779	-1.3677	0.116553	-11.7346	8.46771e-32	2.00644e-30
ENSG00000197563	1726.65	-0.950172	0.0809722	-11.7345	8.47878e-32	2.00738e-30
ENSG00000123104	1917.7	-0.741952	0.0632434	-11.7317	8.7692e-32	2.0744e-30
ENSG00000111785	1139.56	-0.864908	0.0738027	-11.7192	1.01629e-31	2.40207e-30
ENSG00000164187	1703.06	-1.30416	0.111316	-11.7158	1.05795e-31	2.49845e-30
ENSG00000120708	249.86	-1.32349	0.112988	-11.7136	1.08571e-31	2.56185e-30
ENSG00000183696	275.825	1.29737	0.110778	11.7114	1.11436e-31	2.62725e-30
ENSG00000279495	316.699	1.63523	0.139635	11.7108	1.12274e-31	2.64481e-30
ENSG00000147689	101.565	1.96671	0.168145	11.6965	1.32804e-31	3.12583e-30
ENSG00000196405	1602.69	0.694	0.0593662	11.6901	1.43145e-31	3.36642e-30
ENSG00000173269	551.876	0.854617	0.0731808	11.6782	1.64827e-31	3.8731e-30
ENSG00000181852	2631.65	0.626302	0.0536351	11.6771	1.66895e-31	3.91842e-30
ENSG00000102158	3301.82	-0.876388	0.0750637	-11.6753	1.70555e-31	4.00103e-30
ENSG00000151892	743.773	1.27805	0.109485	11.6733	1.74522e-31	4.09067e-30
ENSG00000132669	132.762	-1.66581	0.142732	-11.6709	1.79446e-31	4.20261e-30
ENSG00000073921	5072.91	-0.716604	0.061414	-11.6684	1.8481e-31	4.32464e-30
ENSG00000015133	1193.28	0.856287	0.0734012	11.6658	1.90518e-31	4.45453e-30
ENSG00000183742	938.688	-0.86948	0.0745359	-11.6652	1.91859e-31	4.48216e-30
ENSG00000165548	654.116	0.855702	0.073375	11.662	1.99199e-31	4.6498e-30
ENSG00000082996	2305.22	-0.690529	0.0592739	-11.6498	2.30013e-31	5.36462e-30
ENSG00000004766	800.307	-0.971445	0.0834286	-11.644	2.46102e-31	5.73513e-30
ENSG00000047188	1658.97	-0.851802	0.0731835	-11.6393	2.60242e-31	6.05963e-30
ENSG00000121988	185.608	-1.60613	0.138012	-11.6376	2.65378e-31	6.17414e-30
ENSG00000160685	4930.16	0.75319	0.0647528	11.6318	2.84152e-31	6.60547e-30
ENSG00000087470	3240.25	-0.683539	0.058766	-11.6315	2.84879e-31	6.61693e-30
ENSG00000118007	1838.27	-0.801756	0.0689677	-11.6251	3.07284e-31	7.13147e-30
ENSG00000145687	1701.43	-0.72853	0.0626696	-11.6249	3.07867e-31	7.13913e-30
ENSG00000117399	3579.03	0.829955	0.0714132	11.6219	3.19094e-31	7.3934e-30
ENSG00000086062	8855.09	0.685705	0.0590213	11.6179	3.34176e-31	7.73649e-30
ENSG00000162976	752.474	-1.09611	0.0943506	-11.6175	3.35977e-31	7.77182e-30
ENSG00000060749	3180.61	-0.787513	0.0677988	-11.6154	3.44031e-31	7.9516e-30
ENSG00000231691	43.0337	4.47657	0.385448	11.6139	3.50148e-31	8.08635e-30
ENSG00000151116	787.422	-0.869634	0.0749154	-11.6082	3.74352e-31	8.63825e-30
ENSG00000170786	236.361	1.57103	0.135355	11.6068	3.80771e-31	8.77202e-30
ENSG00000131398	4755.53	-0.795888	0.0685711	-11.6068	3.80763e-31	8.77202e-30
ENSG00000110958	14239.8	-0.713	0.0614503	-11.6029	3.98523e-31	9.17349e-30
ENSG00000226180	167.867	1.51986	0.13111	11.5922	4.51176e-31	1.03771e-29
ENSG00000062485	15277.3	0.687615	0.0593278	11.5901	4.62595e-31	1.0631e-29
ENSG00000138182	2231.97	-1.13133	0.0976291	-11.5881	4.73718e-31	1.08778e-29
ENSG00000112419	789.467	-0.844245	0.0728645	-11.5865	4.82419e-31	1.10686e-29
ENSG00000260710	51.2891	2.99355	0.258477	11.5815	5.11295e-31	1.17216e-29
ENSG00000006704	1840.68	0.707736	0.061171	11.5698	5.8628e-31	1.34297e-29
ENSG00000004975	1767.7	-0.780427	0.0674981	-11.5622	6.40388e-31	1.46572e-29
ENSG00000248092	463.987	-1.15732	0.100157	-11.555	6.96339e-31	1.59249e-29
ENSG00000204442	145.051	-1.76684	0.152909	-11.5548	6.97698e-31	1.59431e-29
ENSG00000017260	2968.88	-0.775752	0.0671439	-11.5536	7.08079e-31	1.61542e-29
ENSG00000129003	2642.13	-1.02468	0.0886894	-11.5536	7.07664e-31	1.61542e-29
ENSG00000245573	64.59	-2.7275	0.236135	-11.5506	7.32853e-31	1.67058e-29
ENSG00000188522	1002.28	1.02355	0.0886223	11.5496	7.42065e-31	1.69022e-29
ENSG00000145348	1048.2	-0.891711	0.0772198	-11.5477	7.5815e-31	1.72546e-29
ENSG00000225787	42.0309	4.13257	0.357883	11.5473	7.61959e-31	1.73134e-29
ENSG00000280020	55.3093	2.98756	0.258723	11.5473	7.61738e-31	1.73134e-29
ENSG00000124795	6162.56	-1.00095	0.0867261	-11.5415	8.14802e-31	1.84992e-29
ENSG00000152894	2038.24	-0.68054	0.0589702	-11.5404	8.25402e-31	1.87248e-29
ENSG00000003096	208.954	-1.35281	0.117286	-11.5343	8.86277e-31	2.00897e-29
ENSG00000133422	1885.04	-0.610477	0.0529368	-11.5322	9.08229e-31	2.05707e-29
ENSG00000152402	122.78	-2.17496	0.188652	-11.5289	9.43153e-31	2.13446e-29
ENSG00000140307	1023.36	-1.06862	0.0926925	-11.5286	9.4655e-31	2.14043e-29
ENSG00000141298	1118.41	-0.945287	0.0820066	-11.527	9.64866e-31	2.1801e-29
ENSG00000187796	387.228	1.02727	0.0891251	11.5262	9.73642e-31	2.19817e-29
ENSG00000164733	6254.97	0.649336	0.0563608	11.5211	1.03323e-30	2.33084e-29
ENSG00000198589	5198.83	-0.677263	0.0587853	-11.521	1.03443e-30	2.33168e-29
ENSG00000073417	827.79	-0.833134	0.0723182	-11.5204	1.04124e-30	2.34516e-29
ENSG00000178623	122.528	1.78665	0.155128	11.5173	1.08001e-30	2.43054e-29
ENSG00000172197	666.931	0.954685	0.082901	11.516	1.09635e-30	2.46534e-29
ENSG00000144824	227.632	-1.25589	0.109099	-11.5115	1.15503e-30	2.59522e-29
ENSG00000117114	55.2287	-3.56009	0.309324	-11.5092	1.18515e-30	2.66079e-29
ENSG00000234488	437.671	11.7639	1.02316	11.4976	1.35681e-30	3.04376e-29
ENSG00000187474	55.4355	-4.13541	0.359689	-11.4972	1.36314e-30	3.05554e-29
ENSG00000110330	2461.35	-0.994144	0.0864913	-11.4942	1.4115e-30	3.16143e-29
ENSG00000100335	2214	0.620223	0.0539994	11.4857	1.55602e-30	3.48234e-29
ENSG00000153201	3811.64	-0.823787	0.0717455	-11.4821	1.62366e-30	3.63086e-29
ENSG00000117500	1427.18	-1.35401	0.117947	-11.4798	1.6663e-30	3.72326e-29
ENSG00000148840	4494.86	0.660432	0.0575464	11.4765	1.7311e-30	3.86499e-29
ENSG00000125652	778.405	1.19259	0.103927	11.4752	1.7567e-30	3.91903e-29
ENSG00000139618	636.612	-1.1145	0.0971301	-11.4743	1.77642e-30	3.9599e-29
ENSG00000112624	1077.29	-0.76679	0.0668345	-11.473	1.80367e-30	4.01746e-29
ENSG00000257167	513.327	-1.32253	0.115314	-11.469	1.88888e-30	4.20396e-29
ENSG00000130159	889.024	1.00362	0.0875082	11.4688	1.89222e-30	4.20807e-29
ENSG00000168280	131.162	-2.11198	0.18432	-11.4582	2.13965e-30	4.75456e-29
ENSG00000196126	203.475	1.26291	0.110259	11.454	2.24617e-30	4.98735e-29
ENSG00000198131	1473.45	0.762087	0.0665581	11.45	2.35278e-30	5.21995e-29
ENSG00000128699	1314.36	-0.974768	0.0851444	-11.4484	2.39471e-30	5.3088e-29
ENSG00000138036	518.478	-0.933913	0.0815996	-11.4451	2.48894e-30	5.51338e-29
ENSG00000085733	10083.9	-0.583827	0.0510387	-11.4389	2.67225e-30	5.91479e-29
ENSG00000106077	3097.75	-0.626842	0.0548009	-11.4385	2.68355e-30	5.93515e-29
ENSG00000123080	831.843	-0.927117	0.0810657	-11.4366	2.74398e-30	6.06405e-29
ENSG00000101911	1498.58	-0.723902	0.0633201	-11.4324	2.87949e-30	6.35855e-29
ENSG00000120742	5303.08	-0.804289	0.0703698	-11.4295	2.97919e-30	6.57355e-29
ENSG00000119396	5069.12	-0.62903	0.0550406	-11.4285	3.01369e-30	6.64449e-29
ENSG00000273066	301.481	1.21027	0.105909	11.4275	3.04683e-30	6.71229e-29
ENSG00000153250	720.807	-0.798053	0.0698698	-11.422	3.24681e-30	7.14729e-29
ENSG00000280075	210.962	1.47019	0.128723	11.4213	3.27193e-30	7.19698e-29
ENSG00000149091	5442.64	0.697941	0.0611597	11.4118	3.65187e-30	8.02642e-29
ENSG00000025039	383.442	1.23839	0.108554	11.408	3.81355e-30	8.37527e-29
ENSG00000134769	1024.78	-0.79723	0.0698884	-11.4072	3.84987e-30	8.44846e-29
ENSG00000168067	2506.53	0.701426	0.061497	11.4059	3.90936e-30	8.57233e-29
ENSG00000224914	239.629	-1.2021	0.105421	-11.4029	4.04507e-30	8.86304e-29
ENSG00000269313	250.916	1.3377	0.117323	11.4019	4.09103e-30	8.95679e-29
ENSG00000248854	94.5258	7.51535	0.659275	11.3994	4.20926e-30	9.20849e-29
ENSG00000163050	1240.19	0.780186	0.0684515	11.3976	4.29595e-30	9.39086e-29
ENSG00000198663	6337.99	-0.516831	0.0453573	-11.3947	4.44539e-30	9.71001e-29
ENSG00000125676	2242.05	-0.754502	0.0662568	-11.3875	4.82393e-30	1.05287e-28
ENSG00000152291	5895.37	-0.540063	0.0474383	-11.3845	4.99263e-30	1.08885e-28
ENSG00000065308	3634.33	-0.707359	0.062136	-11.384	5.02144e-30	1.09429e-28
ENSG00000215252	1509.5	-1.33814	0.117774	-11.3619	6.47341e-30	1.40961e-28
ENSG00000143434	636.178	1.23648	0.108901	11.3542	7.06992e-30	1.53832e-28
ENSG00000206561	117.732	-1.80864	0.159378	-11.3482	7.57238e-30	1.64638e-28
ENSG00000182310	437.483	-0.9055	0.0798544	-11.3394	8.37179e-30	1.81879e-28
ENSG00000111641	1015.37	0.729656	0.0643553	11.3379	8.51353e-30	1.84816e-28
ENSG00000164211	594.882	-2.05358	0.181179	-11.3345	8.85473e-30	1.92075e-28
ENSG00000172878	482.987	-0.897984	0.0793055	-11.3231	1.00853e-29	2.186e-28
ENSG00000169057	2483.14	0.531312	0.0469527	11.3159	1.09487e-29	2.37091e-28
ENSG00000257288	79.3572	-2.34335	0.207086	-11.3158	1.09552e-29	2.37091e-28
ENSG00000165689	2832.92	0.64766	0.0572488	11.3131	1.13064e-29	2.44505e-28
ENSG00000181444	1490.31	0.782932	0.0692073	11.3128	1.13355e-29	2.44945e-28
ENSG00000100918	202.243	1.60196	0.141608	11.3126	1.13678e-29	2.45456e-28
ENSG00000139629	3039.14	0.658583	0.0582219	11.3116	1.14967e-29	2.48048e-28
ENSG00000134243	6789.42	-0.852527	0.0754009	-11.3066	1.21737e-29	2.62455e-28
ENSG00000126457	3584.07	0.67263	0.0595025	11.3042	1.25051e-29	2.69395e-28
ENSG00000111897	3499.34	-0.693302	0.0613479	-11.3012	1.29508e-29	2.78782e-28
ENSG00000071282	1886.98	-0.653165	0.0577976	-11.3009	1.29875e-29	2.79361e-28
ENSG00000127980	811.372	-0.837455	0.0741155	-11.2993	1.32232e-29	2.84214e-28
ENSG00000101098	598.484	1.02617	0.0908358	11.297	1.35842e-29	2.9175e-28
ENSG00000069702	99.5973	-1.99838	0.177016	-11.2893	1.48273e-29	3.18205e-28
ENSG00000117115	768.046	0.798405	0.0707602	11.2832	1.5878e-29	3.40497e-28
ENSG00000102189	2503.94	-0.916442	0.0812283	-11.2823	1.60498e-29	3.43919e-28
ENSG00000246596	65.6506	-2.70029	0.239421	-11.2784	1.67713e-29	3.59106e-28
ENSG00000162909	9002.08	-0.601674	0.0533577	-11.2762	1.71938e-29	3.67874e-28
ENSG00000163818	688.507	-0.917557	0.0813937	-11.2731	1.78257e-29	3.81105e-28
ENSG00000186834	3485.06	-0.727134	0.0645168	-11.2705	1.83614e-29	3.9226e-28
ENSG00000166263	503.278	-0.885105	0.0785635	-11.2661	1.92893e-29	4.11772e-28
ENSG00000134470	416.322	1.00093	0.0888473	11.2657	1.93753e-29	4.13295e-28
ENSG00000105011	1324.98	-0.739918	0.0656946	-11.263	1.99837e-29	4.25952e-28
ENSG00000099821	1936.68	0.864938	0.0767982	11.2625	2.0102e-29	4.2815e-28
ENSG00000168036	12958.9	-0.439501	0.0390266	-11.2616	2.03102e-29	4.32257e-28
ENSG00000163964	3983.69	-0.775345	0.0689231	-11.2494	2.33141e-29	4.95815e-28
ENSG00000213997	112.267	1.91809	0.170526	11.2481	2.36682e-29	5.02967e-28
ENSG00000250091	53.7439	-4.09164	0.363997	-11.2409	2.56831e-29	5.45375e-28
ENSG00000138346	1103.29	-1.06274	0.0945656	-11.2382	2.64831e-29	5.6194e-28
ENSG00000076770	352.637	-1.42984	0.127263	-11.2353	2.73668e-29	5.80254e-28
ENSG00000164647	494.348	1.12355	0.100031	11.232	2.83967e-29	6.01639e-28
ENSG00000182379	1019.35	0.828094	0.0737318	11.2312	2.86705e-29	6.06985e-28
ENSG00000240230	1160.24	1.029	0.0916622	11.226	3.03904e-29	6.42915e-28
ENSG00000145087	79.2429	-2.48291	0.221195	-11.225	3.07428e-29	6.49882e-28
ENSG00000132359	1667.75	0.916732	0.0816959	11.2213	3.20611e-29	6.77242e-28
ENSG00000159147	1303.5	-1.04755	0.0933956	-11.2163	3.39119e-29	7.15801e-28
ENSG00000075568	2276.13	-0.645997	0.0575958	-11.216	3.40141e-29	7.17422e-28
ENSG00000182600	131.599	1.67076	0.148976	11.2149	3.44454e-29	7.25977e-28
ENSG00000274307	82.2574	2.17135	0.193644	11.2131	3.5152e-29	7.40316e-28
ENSG00000263874	314.29	1.45097	0.129405	11.2126	3.53465e-29	7.43858e-28
ENSG00000107929	4967.35	-0.495732	0.0442209	-11.2104	3.6268e-29	7.62682e-28
ENSG00000182287	950.085	-1.30753	0.116643	-11.2097	3.65588e-29	7.68226e-28
ENSG00000180611	749.669	0.737362	0.0657799	11.2095	3.66071e-29	7.68668e-28
ENSG00000087086	5680.57	1.46521	0.130716	11.2091	3.67902e-29	7.71937e-28
ENSG00000270168	221.594	1.72732	0.154164	11.2044	3.87892e-29	8.13276e-28
ENSG00000188130	677.491	1.12814	0.10076	11.1963	4.25317e-29	8.91082e-28
ENSG00000135047	445.97	1.10219	0.098448	11.1957	4.2808e-29	8.96205e-28
ENSG00000113391	569.528	-1.26304	0.112853	-11.1919	4.46697e-29	9.34487e-28
ENSG00000123600	480.914	-0.936729	0.0837011	-11.1914	4.49475e-29	9.39602e-28
ENSG00000247556	4209.68	-0.806875	0.072102	-11.1907	4.52649e-29	9.45536e-28
ENSG00000171587	485.178	1.02118	0.0912753	11.1879	4.67518e-29	9.75875e-28
ENSG00000135185	389.851	-0.969622	0.0866972	-11.184	4.88353e-29	1.01861e-27
ENSG00000126970	75.134	-2.49783	0.223654	-11.1683	5.83077e-29	1.21439e-27
ENSG00000022976	854.913	0.738476	0.0661224	11.1683	5.82716e-29	1.21439e-27
ENSG00000114993	1741.5	0.783969	0.0702529	11.1592	6.45461e-29	1.34333e-27
ENSG00000186806	943.516	0.897354	0.0804307	11.1569	6.62928e-29	1.37866e-27
ENSG00000031698	4710.75	1.00208	0.0898267	11.1557	6.71411e-29	1.39528e-27
ENSG00000062194	5879.09	-0.578385	0.0518539	-11.1541	6.83628e-29	1.41962e-27
ENSG00000072042	2211.59	-1.12403	0.100774	-11.1539	6.85178e-29	1.4218e-27
ENSG00000127481	10230.1	-0.565588	0.0507102	-11.1533	6.89687e-29	1.4301e-27
ENSG00000264061	74.3733	-3.27208	0.293386	-11.1528	6.9356e-29	1.43708e-27
ENSG00000125827	1208.36	-0.838334	0.0751902	-11.1495	7.20055e-29	1.49088e-27
ENSG00000068078	888.342	0.930008	0.0834757	11.1411	7.91696e-29	1.63801e-27
ENSG00000023902	150.287	1.63585	0.146913	11.1348	8.49221e-29	1.75574e-27
ENSG00000068305	1243.65	-0.70746	0.0635496	-11.1324	8.72534e-29	1.80262e-27
ENSG00000214456	98.027	2.31132	0.207645	11.1311	8.85473e-29	1.82801e-27
ENSG00000158985	1238.82	-0.833191	0.0748598	-11.13	8.96221e-29	1.84761e-27
ENSG00000169083	2780.03	-0.73492	0.0660305	-11.13	8.96275e-29	1.84761e-27
ENSG00000166037	2122.15	-0.749739	0.0673845	-11.1263	9.34572e-29	1.92515e-27
ENSG00000154328	176.971	1.31214	0.11795	11.1245	9.53062e-29	1.96181e-27
ENSG00000139865	1043.92	-1.0577	0.0951153	-11.1202	1.00079e-28	2.05856e-27
ENSG00000068796	1573.71	-0.826722	0.0743471	-11.1198	1.00533e-28	2.06637e-27
ENSG00000213145	314.556	1.63929	0.147433	11.1189	1.01521e-28	2.08518e-27
ENSG00000198353	978.164	-0.830269	0.0746876	-11.1166	1.04212e-28	2.13889e-27
ENSG00000167325	4352.01	-0.704418	0.0634429	-11.1032	1.21061e-28	2.4829e-27
ENSG00000163535	630.583	-0.859528	0.0774368	-11.0997	1.25823e-28	2.57869e-27
ENSG00000130821	2949.33	0.65378	0.0589018	11.0995	1.26171e-28	2.58394e-27
ENSG00000283390	48.9729	5.6859	0.512527	11.0939	1.34359e-28	2.74964e-27
ENSG00000054793	3128.74	0.845022	0.0762122	11.0878	1.4386e-28	2.94194e-27
ENSG00000164542	706.583	-0.916643	0.0826943	-11.0847	1.48835e-28	3.04147e-27
ENSG00000213654	109.715	1.66886	0.150646	11.078	1.60331e-28	3.27402e-27
ENSG00000204947	108.245	-2.04126	0.184264	-11.0779	1.60625e-28	3.27766e-27
ENSG00000121270	6172.68	0.895691	0.0808894	11.073	1.69569e-28	3.45766e-27
ENSG00000197183	564.919	0.810142	0.0731707	11.0719	1.71627e-28	3.49711e-27
ENSG00000177839	207.175	-1.42048	0.128306	-11.0711	1.73345e-28	3.52956e-27
ENSG00000082641	10825.3	0.640774	0.0578823	11.0703	1.74828e-28	3.55719e-27
ENSG00000116679	2625.63	-0.70195	0.0634212	-11.0681	1.79233e-28	3.64418e-27
ENSG00000112335	1433.01	-1.06443	0.0961784	-11.0673	1.80774e-28	3.67287e-27
ENSG00000164684	3946.03	-1.18422	0.107008	-11.0667	1.81974e-28	3.69459e-27
ENSG00000109911	643.307	-0.891098	0.0805306	-11.0653	1.84768e-28	3.74862e-27
ENSG00000134884	2244.33	-0.685847	0.0620006	-11.0619	1.91905e-28	3.89063e-27
ENSG00000149577	6097.8	0.559726	0.0505996	11.0619	1.92055e-28	3.89087e-27
ENSG00000180182	3461.02	-0.571385	0.0516574	-11.061	1.93818e-28	3.92377e-27
ENSG00000178498	2197.85	0.688477	0.0622549	11.059	1.98289e-28	4.0114e-27
ENSG00000231074	1804.14	-0.732483	0.066257	-11.0552	2.06894e-28	4.18249e-27
ENSG00000057019	1509.23	-1.2607	0.114158	-11.0435	2.3566e-28	4.76061e-27
ENSG00000153029	1563.92	-0.697285	0.063142	-11.0431	2.36639e-28	4.77696e-27
ENSG00000174705	148.926	1.45908	0.132188	11.0379	2.50895e-28	5.06112e-27
ENSG00000164659	324.09	1.20594	0.109295	11.0338	2.62621e-28	5.29388e-27
ENSG00000039319	1940.25	-1.10663	0.100296	-11.0336	2.63142e-28	5.30059e-27
ENSG00000111405	50.0337	2.79858	0.253649	11.0333	2.64096e-28	5.31601e-27
ENSG00000137145	1937.68	-0.86549	0.0784485	-11.0326	2.66103e-28	5.3526e-27
ENSG00000248866	110.529	-1.80426	0.163551	-11.0318	2.68574e-28	5.39845e-27
ENSG00000234882	41.6205	4.51207	0.40907	11.0301	2.73652e-28	5.49661e-27
ENSG00000118322	100.163	-1.86655	0.169248	-11.0284	2.78641e-28	5.59283e-27
ENSG00000072133	118.219	-1.88101	0.170561	-11.0283	2.78937e-28	5.5948e-27
ENSG00000108064	2084.01	-0.67841	0.0615323	-11.0253	2.88687e-28	5.78624e-27
ENSG00000148737	650.509	-0.789916	0.0716646	-11.0224	2.98009e-28	5.96886e-27
ENSG00000160299	5352.73	-0.656986	0.059629	-11.0179	3.13337e-28	6.27141e-27
ENSG00000275342	1053.84	0.862698	0.0783149	11.0158	3.20839e-28	6.417e-27
ENSG00000116667	362.622	1.04338	0.0947312	11.0141	3.26812e-28	6.53185e-27
ENSG00000021300	264.755	1.16985	0.106304	11.0048	3.6222e-28	7.2344e-27
ENSG00000126602	3722.69	0.574566	0.0522111	11.0047	3.62823e-28	7.24131e-27
ENSG00000160111	5164.39	-0.83318	0.0757187	-11.0036	3.67072e-28	7.32095e-27
ENSG00000105855	77.8694	-2.72355	0.247608	-10.9994	3.84571e-28	7.66452e-27
ENSG00000112290	355.503	-1.36649	0.124326	-10.9912	4.21176e-28	8.38816e-27
ENSG00000170468	847.4	0.815463	0.0742049	10.9894	4.30005e-28	8.55795e-27
ENSG00000100105	1723.66	0.637744	0.0580459	10.9869	4.41902e-28	8.78853e-27
ENSG00000106536	363.545	-1.0999	0.10012	-10.9858	4.47107e-28	8.88577e-27
ENSG00000130700	210.532	1.21222	0.110381	10.9821	4.65756e-28	9.24989e-27
ENSG00000120820	89.184	-2.19992	0.200324	-10.9818	4.6766e-28	9.28117e-27
ENSG00000183049	297.203	-1.04111	0.0948771	-10.9733	5.13719e-28	1.01881e-26
ENSG00000100528	2460.65	-0.652589	0.0594798	-10.9716	5.2338e-28	1.03724e-26
ENSG00000138758	3455.16	-0.605384	0.0551797	-10.9711	5.25992e-28	1.04169e-26
ENSG00000170085	393.66	-1.36083	0.124062	-10.969	5.38913e-28	1.06653e-26
ENSG00000153904	1540.76	-0.794811	0.072524	-10.9593	5.99745e-28	1.18608e-26
ENSG00000105372	14494.7	0.78712	0.0718255	10.9588	6.03117e-28	1.19192e-26
ENSG00000130584	771.655	1.18379	0.108167	10.9441	7.09311e-28	1.4008e-26
ENSG00000128274	148.998	1.47136	0.134474	10.9416	7.28795e-28	1.43827e-26
ENSG00000151575	241.939	-1.37721	0.125935	-10.9359	7.76664e-28	1.53167e-26
ENSG00000112992	3635.28	-0.653919	0.0597975	-10.9356	7.79221e-28	1.53564e-26
ENSG00000102226	1221	0.806549	0.0737738	10.9327	8.03922e-28	1.58322e-26
ENSG00000182107	1996.02	-0.69962	0.064014	-10.9292	8.36032e-28	1.6453e-26
ENSG00000262152	67.1996	2.33109	0.213315	10.928	8.47283e-28	1.66628e-26
ENSG00000035687	1686.36	-0.748577	0.0685152	-10.9257	8.68492e-28	1.70681e-26
ENSG00000055211	990.802	-0.942784	0.086296	-10.925	8.75437e-28	1.71926e-26
ENSG00000160752	2949.88	-0.597614	0.0547154	-10.9222	9.02482e-28	1.77114e-26
ENSG00000156504	803.714	-0.776419	0.0711121	-10.9182	9.42985e-28	1.84934e-26
ENSG00000105287	2079.23	0.65046	0.0595966	10.9144	9.83921e-28	1.92828e-26
ENSG00000260105	47.3538	5.34806	0.4902	10.91	1.03302e-27	2.0231e-26
ENSG00000172893	5832.44	-0.571674	0.0524191	-10.9058	1.08089e-27	2.11539e-26
ENSG00000166123	1112.55	0.645851	0.0592274	10.9046	1.09575e-27	2.14299e-26
ENSG00000182575	49.4194	2.79857	0.256797	10.898	1.17808e-27	2.3024e-26
ENSG00000068354	923.968	0.774949	0.0711141	10.8973	1.18792e-27	2.32002e-26
ENSG00000108370	326.915	-1.09903	0.10088	-10.8945	1.22456e-27	2.38992e-26
ENSG00000111674	511.508	0.833709	0.0765367	10.8929	1.24564e-27	2.42938e-26
ENSG00000237523	176.377	-1.75906	0.161536	-10.8896	1.29205e-27	2.51815e-26
ENSG00000170819	73.5049	2.20691	0.202682	10.8885	1.30713e-27	2.54579e-26
ENSG00000140391	2892.84	-0.809778	0.0744274	-10.8801	1.43393e-27	2.79082e-26
ENSG00000116117	413.913	-1.08364	0.0996103	-10.8788	1.45426e-27	2.82844e-26
ENSG00000261143	46.7583	5.63171	0.517841	10.8754	1.51046e-27	2.93573e-26
ENSG00000174529	153.926	1.41878	0.130461	10.8751	1.51557e-27	2.94362e-26
ENSG00000196756	974.734	0.865451	0.0795879	10.8742	1.53067e-27	2.97091e-26
ENSG00000075945	923.381	-1.12745	0.103695	-10.8727	1.55538e-27	3.01681e-26
ENSG00000108091	8017.34	-0.63519	0.0584246	-10.872	1.56796e-27	3.03911e-26
ENSG00000241043	97.8856	2.04812	0.188393	10.8715	1.57533e-27	3.05129e-26
ENSG00000155097	3513.5	-0.868674	0.0799157	-10.8699	1.60401e-27	3.10471e-26
ENSG00000196557	1635.02	0.953585	0.0877369	10.8687	1.62521e-27	3.14359e-26
ENSG00000090861	16103.7	0.606684	0.0558213	10.8683	1.63157e-27	3.15373e-26
ENSG00000128394	208.828	1.20764	0.111127	10.8672	1.65169e-27	3.19044e-26
ENSG00000090539	212.85	1.37127	0.126196	10.8662	1.67087e-27	3.22529e-26
ENSG00000111077	4259.27	0.807712	0.0743343	10.8659	1.6749e-27	3.23085e-26
ENSG00000165487	940.616	-0.85409	0.0786123	-10.8646	1.7e-27	3.27703e-26
ENSG00000007866	3438.98	-0.639113	0.0588326	-10.8632	1.72515e-27	3.32325e-26
ENSG00000106003	159.401	1.4878	0.13702	10.8583	1.82151e-27	3.50646e-26
ENSG00000136108	2323.22	-0.844305	0.0777864	-10.8541	1.90572e-27	3.66607e-26
ENSG00000041353	1551.35	-1.08699	0.100174	-10.851	1.97279e-27	3.79251e-26
ENSG00000162688	1190.46	-0.844789	0.0778671	-10.8491	2.01377e-27	3.86867e-26
ENSG00000083123	704.031	-0.997239	0.0919721	-10.8428	2.15684e-27	4.14069e-26
ENSG00000162437	699.488	-0.769682	0.0709869	-10.8426	2.1623e-27	4.14621e-26
ENSG00000004660	442.662	0.950068	0.0876238	10.8426	2.16265e-27	4.14621e-26
ENSG00000152078	538.878	-1.6463	0.151839	-10.8424	2.16661e-27	4.15099e-26
ENSG00000136828	1276.31	-0.731274	0.0674466	-10.8423	2.17018e-27	4.15499e-26
ENSG00000069812	58.4962	2.36816	0.218548	10.8359	2.32698e-27	4.45218e-26
ENSG00000158683	604.516	1.1295	0.104269	10.8325	2.41359e-27	4.61476e-26
ENSG00000122176	162.906	1.64433	0.151915	10.824	2.64905e-27	5.06154e-26
ENSG00000137601	463.499	-0.918526	0.0848758	-10.822	2.70805e-27	5.17077e-26
ENSG00000255471	53.3664	-3.4535	0.319165	-10.8204	2.75543e-27	5.25767e-26
ENSG00000213923	2769.31	0.772832	0.0714532	10.8159	2.89362e-27	5.51763e-26
ENSG00000138380	176.972	-1.42736	0.132058	-10.8086	3.13442e-27	5.97276e-26
ENSG00000260910	55.4524	2.87227	0.265744	10.8084	3.14062e-27	5.98052e-26
ENSG00000184787	4184.49	-0.616781	0.057066	-10.8082	3.14823e-27	5.99099e-26
ENSG00000244754	2190.25	-0.97067	0.0898241	-10.8064	3.21184e-27	6.1079e-26
ENSG00000186104	746.715	-1.05344	0.0974926	-10.8054	3.24644e-27	6.16955e-26
ENSG00000146733	902.868	0.716309	0.0662942	10.805	3.25942e-27	6.19005e-26
ENSG00000141314	65.3916	-2.5057	0.231926	-10.8039	3.29968e-27	6.26229e-26
ENSG00000198176	3369.73	-0.58769	0.0543967	-10.8038	3.30322e-27	6.26479e-26
ENSG00000149679	1496.08	-0.639684	0.0592129	-10.8031	3.32751e-27	6.30663e-26
ENSG00000261762	103.661	-1.87649	0.173714	-10.8021	3.36262e-27	6.36888e-26
ENSG00000139546	1641.45	0.581471	0.0538437	10.7992	3.4708e-27	6.56938e-26
ENSG00000100142	44.5827	3.19501	0.295866	10.7988	3.4859e-27	6.59354e-26
ENSG00000154945	1716.97	0.585156	0.0542131	10.7936	3.68919e-27	6.97339e-26
ENSG00000163624	1891.24	-0.847331	0.0786014	-10.7801	4.27421e-27	8.07379e-26
ENSG00000100276	328.402	1.07566	0.0998059	10.7775	4.39471e-27	8.29587e-26
ENSG00000225733	5828.56	-0.635753	0.0589997	-10.7755	4.49159e-27	8.47306e-26
ENSG00000232352	133.102	1.51405	0.140527	10.7741	4.56359e-27	8.60315e-26
ENSG00000155367	407.92	0.985755	0.0914995	10.7733	4.60047e-27	8.66688e-26
ENSG00000129103	7476.65	-0.506728	0.0470817	-10.7627	5.16194e-27	9.71815e-26
ENSG00000069974	414.843	-1.0767	0.100045	-10.7621	5.19513e-27	9.77412e-26
ENSG00000198125	491.068	0.951892	0.0884703	10.7594	5.34893e-27	1.00568e-25
ENSG00000184371	201.809	1.3036	0.121192	10.7565	5.52294e-27	1.0377e-25
ENSG00000012124	54.9199	6.23414	0.580041	10.7478	6.07162e-27	1.14004e-25
ENSG00000173511	2421.86	1.09209	0.101682	10.7403	6.58512e-27	1.23563e-25
ENSG00000160190	1743.97	0.556469	0.0518124	10.7401	6.59926e-27	1.23746e-25
ENSG00000178177	380.668	-1.08381	0.100927	-10.7386	6.70483e-27	1.25642e-25
ENSG00000167703	1568.18	0.981444	0.0914224	10.7353	6.95144e-27	1.30177e-25
ENSG00000095539	929.354	0.720817	0.0671659	10.7319	7.21119e-27	1.34952e-25
ENSG00000114812	2670.07	0.699181	0.0651516	10.7316	7.2338e-27	1.35285e-25
ENSG00000173264	2183.65	-0.63484	0.05917	-10.7291	7.43293e-27	1.38917e-25
ENSG00000163357	467.862	0.946882	0.0882863	10.7251	7.75772e-27	1.44891e-25
ENSG00000198586	1332.05	-0.828939	0.0773251	-10.7202	8.18421e-27	1.52756e-25
ENSG00000041802	6257.5	0.622441	0.0580833	10.7163	8.53059e-27	1.5901e-25
ENSG00000162129	888.747	0.645191	0.060206	10.7164	8.52598e-27	1.5901e-25
ENSG00000254872	169.089	1.58349	0.147799	10.7138	8.76433e-27	1.6326e-25
ENSG00000109654	531.598	-1.06565	0.0994819	-10.712	8.94044e-27	1.6643e-25
ENSG00000124193	7791.67	-0.454042	0.0424234	-10.7026	9.89222e-27	1.84027e-25
ENSG00000072310	5396.62	-0.931749	0.0870788	-10.7001	1.01706e-26	1.89081e-25
ENSG00000256087	762.808	-0.807713	0.075508	-10.697	1.05075e-26	1.95216e-25
ENSG00000123999	124.381	-1.69839	0.158852	-10.6916	1.11395e-26	2.06821e-25
ENSG00000280033	71.0138	2.42597	0.226936	10.6901	1.13228e-26	2.10086e-25
ENSG00000123473	1168.59	-0.716666	0.067086	-10.6828	1.22519e-26	2.27176e-25
ENSG00000164494	387.444	-1.0036	0.093976	-10.6793	1.27245e-26	2.35783e-25
ENSG00000175482	991.144	0.82639	0.0774047	10.6762	1.31516e-26	2.43537e-25
ENSG00000132356	2896.27	-0.815486	0.0763891	-10.6754	1.32642e-26	2.45462e-25
ENSG00000115540	422.677	-1.21114	0.113575	-10.6638	1.50313e-26	2.7798e-25
ENSG00000260912	286.008	-1.15991	0.108788	-10.6621	1.53046e-26	2.8285e-25
ENSG00000110092	5044.46	0.539177	0.0505767	10.6606	1.55627e-26	2.87432e-25
ENSG00000214872	81.0722	2.23905	0.210168	10.6536	1.67745e-26	3.09611e-25
ENSG00000181061	955.774	-1.41193	0.132539	-10.653	1.68905e-26	3.11547e-25
ENSG00000157927	400.627	1.30287	0.122355	10.6483	1.77659e-26	3.2748e-25
ENSG00000081026	969.785	-0.713336	0.0670131	-10.6447	1.84533e-26	3.39929e-25
ENSG00000177731	11108.8	0.513518	0.0482434	10.6443	1.85365e-26	3.41239e-25
ENSG00000169783	141.83	1.49724	0.140781	10.6352	2.04399e-26	3.76032e-25
ENSG00000083750	663.231	-0.822414	0.0773665	-10.6301	2.15874e-26	3.96885e-25
ENSG00000198856	1132.35	-0.669124	0.0629543	-10.6287	2.19092e-26	4.02538e-25
ENSG00000086619	756.347	-0.974754	0.0917367	-10.6256	2.26642e-26	4.1614e-25
ENSG00000129084	444.703	-0.964103	0.0907718	-10.6212	2.37555e-26	4.35822e-25
ENSG00000198246	215.709	1.13715	0.107065	10.6211	2.3767e-26	4.35822e-25
ENSG00000101574	380.406	-1.39108	0.130978	-10.6208	2.38568e-26	4.37183e-25
ENSG00000155660	6840.29	0.485806	0.0457499	10.6187	2.43856e-26	4.46585e-25
ENSG00000020577	5048.93	-0.626272	0.0589827	-10.6179	2.46027e-26	4.50267e-25
ENSG00000070047	1561.84	-0.808207	0.0761371	-10.6151	2.53394e-26	4.63451e-25
ENSG00000233560	72.8322	2.00792	0.189194	10.613	2.59158e-26	4.73685e-25
ENSG00000178297	174.231	1.42217	0.13401	10.6124	2.60853e-26	4.76474e-25
ENSG00000215039	252.282	1.15427	0.108768	10.6122	2.61496e-26	4.77341e-25
ENSG00000126249	103.36	1.96175	0.184901	10.6097	2.68541e-26	4.89884e-25
ENSG00000079974	921.919	-0.782442	0.0737664	-10.607	2.76396e-26	5.03887e-25
ENSG00000160226	662.42	0.957233	0.0902781	10.6032	2.88061e-26	5.24814e-25
ENSG00000144579	2480.7	-0.697578	0.0657968	-10.602	2.91695e-26	5.31092e-25
ENSG00000182742	170.005	1.31949	0.124504	10.5979	3.04587e-26	5.54206e-25
ENSG00000147251	335.864	-1.17351	0.110762	-10.5949	3.14757e-26	5.72343e-25
ENSG00000074696	5403.31	-0.574147	0.0541941	-10.5943	3.16777e-26	5.75645e-25
ENSG00000143742	4777.8	-1.29835	0.12256	-10.5936	3.19207e-26	5.79687e-25
ENSG00000196793	1242	0.697176	0.0658383	10.5892	3.34403e-26	6.06892e-25
ENSG00000170571	56.1854	-3.29467	0.311161	-10.5883	3.37689e-26	6.12463e-25
ENSG00000033178	1436.7	-1.16112	0.10972	-10.5826	3.58774e-26	6.50287e-25
ENSG00000180998	164.894	-2.28673	0.216085	-10.5826	3.59035e-26	6.50341e-25
ENSG00000113594	211.689	1.42915	0.135073	10.5805	3.66875e-26	6.64116e-25
ENSG00000160602	565.803	-0.8729	0.0825371	-10.5758	3.85665e-26	6.97684e-25
ENSG00000223812	49.6503	-3.38923	0.320571	-10.5725	3.99711e-26	7.22629e-25
ENSG00000167680	99.2543	1.79135	0.169496	10.5687	4.16333e-26	7.52198e-25
ENSG00000135045	313.215	-1.32237	0.125137	-10.5674	4.22045e-26	7.62031e-25
ENSG00000225484	530.605	-0.852046	0.080637	-10.5664	4.26401e-26	7.69403e-25
ENSG00000255050	271.37	1.19519	0.113141	10.5637	4.39175e-26	7.91947e-25
ENSG00000281205	145.443	1.42269	0.134679	10.5635	4.39716e-26	7.92415e-25
ENSG00000146963	952.235	-0.844521	0.0799517	-10.5629	4.42817e-26	7.97494e-25
ENSG00000100814	472.856	0.908991	0.0860605	10.5622	4.45921e-26	8.02572e-25
ENSG00000204282	806.326	1.10568	0.104738	10.5566	4.73532e-26	8.51723e-25
ENSG00000189046	626.229	0.926381	0.0877596	10.5559	4.77106e-26	8.57606e-25
ENSG00000283342	247.33	-1.82635	0.173028	-10.5552	4.8041e-26	8.62995e-25
ENSG00000178078	1550.44	0.730324	0.0693129	10.5366	5.85607e-26	1.0513e-24
ENSG00000136933	919.262	0.823523	0.0781758	10.5342	6.00667e-26	1.07765e-24
ENSG00000137309	4721.17	1.008	0.0957021	10.5327	6.10712e-26	1.09498e-24
ENSG00000070495	1141.97	0.728649	0.069191	10.531	6.21843e-26	1.11422e-24
ENSG00000130787	3465.18	0.68264	0.0648285	10.5299	6.28762e-26	1.12591e-24
ENSG00000124209	2353.9	-0.691263	0.0656604	-10.5279	6.42815e-26	1.15034e-24
ENSG00000226942	113.315	1.75595	0.166822	10.5259	6.56236e-26	1.17361e-24
ENSG00000181381	182.563	-1.55057	0.147321	-10.5251	6.62026e-26	1.18322e-24
ENSG00000175662	3231.23	-0.613118	0.0582592	-10.524	6.69959e-26	1.19664e-24
ENSG00000141854	374.94	1.18236	0.112362	10.5228	6.78527e-26	1.21118e-24
ENSG00000163659	1218.88	0.769741	0.073177	10.5189	7.06986e-26	1.26118e-24
ENSG00000026508	352.649	1.05574	0.100386	10.5168	7.22788e-26	1.28855e-24
ENSG00000143772	1570.6	0.710931	0.0676032	10.5162	7.27242e-26	1.29568e-24
ENSG00000167081	1171.16	-0.753504	0.0716557	-10.5156	7.31977e-26	1.30329e-24
ENSG00000214367	1277.88	-0.925695	0.0880355	-10.515	7.36628e-26	1.31074e-24
ENSG00000122008	881.016	-0.811293	0.0771737	-10.5126	7.56117e-26	1.34457e-24
ENSG00000131747	13314.9	-0.692288	0.0658598	-10.5115	7.64436e-26	1.35851e-24
ENSG00000256678	72.1939	2.06032	0.19601	10.5113	7.66154e-26	1.36071e-24
ENSG00000174469	177.54	-1.33915	0.127405	-10.511	7.69052e-26	1.365e-24
ENSG00000106266	2302.66	0.799288	0.076052	10.5098	7.78858e-26	1.38153e-24
ENSG00000131788	3565	0.468106	0.0445413	10.5095	7.8113e-26	1.38469e-24
ENSG00000153214	1361.9	-0.857592	0.0816547	-10.5027	8.39785e-26	1.48773e-24
ENSG00000141582	1649.09	1.05583	0.100538	10.5018	8.47483e-26	1.50043e-24
ENSG00000001629	1739.65	-0.578029	0.0550423	-10.5015	8.49758e-26	1.50351e-24
ENSG00000196584	551.592	-1.12946	0.107556	-10.5011	8.53553e-26	1.50928e-24
ENSG00000124216	46.1988	2.7695	0.263885	10.4951	9.0992e-26	1.60794e-24
ENSG00000256223	727.504	-1.1017	0.105018	-10.4906	9.54317e-26	1.68534e-24
ENSG00000249158	251.258	-1.20631	0.115145	-10.4764	1.10907e-25	1.95742e-24
ENSG00000143971	376.327	-1.17908	0.112553	-10.4758	1.11642e-25	1.96915e-24
ENSG00000100523	707.758	-0.840472	0.0802389	-10.4746	1.12978e-25	1.99147e-24
ENSG00000234840	128.513	-1.57128	0.150079	-10.4696	1.19083e-25	2.09779e-24
ENSG00000004897	3043.35	-0.570192	0.054462	-10.4695	1.19215e-25	2.09879e-24
ENSG00000117859	3569.77	-0.679599	0.064939	-10.4652	1.2483e-25	2.19628e-24
ENSG00000135622	692.972	0.726133	0.0693936	10.464	1.26443e-25	2.22328e-24
ENSG00000215251	1001.75	0.839984	0.0803073	10.4596	1.32382e-25	2.32625e-24
ENSG00000065989	83.6796	1.9604	0.187428	10.4595	1.32553e-25	2.3278e-24
ENSG00000117143	1717.83	0.64706	0.0618716	10.4581	1.34511e-25	2.36072e-24
ENSG00000188818	3196.96	0.755473	0.0722587	10.4551	1.38839e-25	2.43515e-24
ENSG00000254337	199.447	1.48563	0.142119	10.4534	1.41354e-25	2.47773e-24
ENSG00000170100	2690.71	-0.540085	0.0516667	-10.4532	1.41603e-25	2.48055e-24
ENSG00000184216	2904.57	0.890727	0.0852333	10.4505	1.45827e-25	2.55296e-24
ENSG00000265666	71.3638	2.36124	0.226112	10.4428	1.58075e-25	2.76567e-24
ENSG00000186409	192.392	-1.49045	0.142838	-10.4345	1.72525e-25	3.01662e-24
ENSG00000267892	44.1283	3.28008	0.314475	10.4303	1.8028e-25	3.15026e-24
ENSG00000065243	1810.56	-0.968902	0.0929809	-10.4204	2.00023e-25	3.49309e-24
ENSG00000063241	1278.86	0.92234	0.088523	10.4192	2.02624e-25	3.53633e-24
ENSG00000126709	1078.92	-1.40759	0.135181	-10.4126	2.17162e-25	3.78771e-24
ENSG00000280832	350.951	1.11159	0.106779	10.4102	2.22722e-25	3.8823e-24
ENSG00000131188	234.788	1.21928	0.117158	10.4072	2.29857e-25	4.0042e-24
ENSG00000182957	548.902	0.829262	0.0796939	10.4056	2.33797e-25	4.07032e-24
ENSG00000128590	600.943	-0.937907	0.0901773	-10.4007	2.46113e-25	4.28209e-24
ENSG00000124098	2212.68	-0.744287	0.0715827	-10.3976	2.54321e-25	4.42218e-24
ENSG00000111859	278.381	1.11574	0.107329	10.3955	2.59981e-25	4.51781e-24
ENSG00000237190	1032.64	0.982822	0.0945581	10.3938	2.64467e-25	4.59293e-24
ENSG00000185085	2294.49	0.729099	0.0701603	10.3919	2.69879e-25	4.68404e-24
ENSG00000111843	1429.74	-0.642992	0.0618892	-10.3894	2.77085e-25	4.80615e-24
ENSG00000165061	87.3591	-6.86477	0.661023	-10.3851	2.89959e-25	5.02637e-24
ENSG00000049769	424.605	1.05532	0.101629	10.384	2.93272e-25	5.08069e-24
ENSG00000108349	5866.46	0.702155	0.0676205	10.3838	2.93976e-25	5.08975e-24
ENSG00000168246	894.32	-0.74837	0.0720724	-10.3836	2.94492e-25	5.09557e-24
ENSG00000011260	2022.8	0.797373	0.0768047	10.3818	2.9997e-25	5.18716e-24
ENSG00000164308	557.728	-0.831177	0.0800774	-10.3797	3.06808e-25	5.30216e-24
ENSG00000196542	894.142	-0.93971	0.0905434	-10.3786	3.10424e-25	5.36137e-24
ENSG00000132541	393.441	-0.912289	0.0879322	-10.3749	3.22504e-25	5.5666e-24
ENSG00000164587	17847.5	0.671399	0.0647491	10.3692	3.42215e-25	5.90321e-24
ENSG00000187601	305.829	1.11936	0.107952	10.3691	3.4281e-25	5.90986e-24
ENSG00000168539	58.5089	2.41545	0.232953	10.3689	3.43619e-25	5.92018e-24
ENSG00000143061	6297.07	-0.562932	0.0542958	-10.3679	3.47193e-25	5.97811e-24
ENSG00000061936	4810	0.586427	0.05657	10.3664	3.52559e-25	6.06682e-24
ENSG00000104341	5113.6	-0.495832	0.0478347	-10.3655	3.55776e-25	6.11844e-24
ENSG00000197557	151.177	-1.38218	0.133373	-10.3633	3.64163e-25	6.25886e-24
ENSG00000129071	1648.16	-0.77684	0.0749616	-10.3632	3.64663e-25	6.26364e-24
ENSG00000135547	77.9796	2.18479	0.210832	10.3628	3.66264e-25	6.28731e-24
ENSG00000073150	100.356	2.21815	0.214061	10.3623	3.68151e-25	6.31585e-24
ENSG00000149781	293.845	1.34292	0.129659	10.3573	3.87653e-25	6.64638e-24
ENSG00000185480	679.96	-0.834162	0.0805679	-10.3535	4.03341e-25	6.91116e-24
ENSG00000184349	755.263	-0.859078	0.0829797	-10.3529	4.06107e-25	6.95434e-24
ENSG00000170088	956.613	-0.67052	0.0647683	-10.3526	4.07263e-25	6.9699e-24
ENSG00000176783	1526.47	-0.839324	0.0811146	-10.3474	4.30111e-25	7.35647e-24
ENSG00000214279	812.882	-1.52445	0.147365	-10.3447	4.42342e-25	7.56107e-24
ENSG00000189229	93.9354	-1.85383	0.179269	-10.3411	4.59409e-25	7.84805e-24
ENSG00000276662	181.754	1.67045	0.161579	10.3382	4.73163e-25	8.07813e-24
ENSG00000106080	1620.2	-0.833778	0.080653	-10.3378	4.75084e-25	8.10601e-24
ENSG00000225855	873.902	-0.858224	0.0830413	-10.3349	4.89903e-25	8.35381e-24
ENSG00000107829	1764.34	-0.574554	0.0556044	-10.3329	5.00322e-25	8.52632e-24
ENSG00000125821	915.649	1.04899	0.101531	10.3317	5.06541e-25	8.62709e-24
ENSG00000258472	359.06	0.92917	0.0899403	10.331	5.10417e-25	8.68786e-24
ENSG00000124839	2560.06	0.576747	0.0558274	10.3309	5.10878e-25	8.69047e-24
ENSG00000082898	9858.84	-0.6716	0.0650274	-10.328	5.26692e-25	8.95407e-24
ENSG00000065029	2793.14	-0.621975	0.0602303	-10.3266	5.34166e-25	9.07567e-24
ENSG00000120756	2618.21	-0.584261	0.0565859	-10.3252	5.4204e-25	9.20391e-24
ENSG00000138459	674.232	-0.777875	0.0753405	-10.3248	5.44372e-25	9.23795e-24
ENSG00000228878	105.781	-1.65547	0.160347	-10.3243	5.47132e-25	9.27921e-24
ENSG00000180190	283.359	-1.48925	0.144281	-10.3219	5.6099e-25	9.50852e-24
ENSG00000243199	146.654	1.37799	0.133503	10.3218	5.61407e-25	9.50989e-24
ENSG00000152229	1156.51	-0.782538	0.0758552	-10.3162	5.95326e-25	1.00784e-23
ENSG00000167291	4263.89	0.699458	0.0678201	10.3134	6.12729e-25	1.03668e-23
ENSG00000273009	67.6874	-2.25372	0.218547	-10.3123	6.20064e-25	1.04846e-23
ENSG00000151474	1330.9	-0.705612	0.0684258	-10.3121	6.2147e-25	1.05021e-23
ENSG00000013441	1679.44	-0.919362	0.0891741	-10.3097	6.3671e-25	1.07532e-23
ENSG00000163507	914.765	-0.796329	0.0772436	-10.3093	6.39514e-25	1.07941e-23
ENSG00000257337	2121.71	0.633778	0.0614939	10.3063	6.59634e-25	1.1127e-23
ENSG00000179178	1646.96	0.691516	0.0670971	10.3062	6.6065e-25	1.11375e-23
ENSG00000214290	147.259	-1.4467	0.140394	-10.3045	6.7207e-25	1.13233e-23
ENSG00000150093	6124.57	-0.769212	0.0746697	-10.3015	6.93531e-25	1.16779e-23
ENSG00000225762	51.4815	-2.8163	0.273414	-10.3005	7.01078e-25	1.17979e-23
ENSG00000132432	1373.33	-0.768535	0.0746142	-10.3001	7.03693e-25	1.18349e-23
ENSG00000183826	954.737	-0.708777	0.0688141	-10.2999	7.05491e-25	1.1858e-23
ENSG00000106089	384.313	1.05276	0.102288	10.2921	7.64702e-25	1.28456e-23
ENSG00000232987	74.9373	2.39532	0.232747	10.2915	7.69558e-25	1.29195e-23
ENSG00000116539	5766.1	-0.600191	0.058327	-10.2901	7.80891e-25	1.3102e-23
ENSG00000137992	1008.31	-0.626102	0.0608494	-10.2894	7.86786e-25	1.3193e-23
ENSG00000156675	6642.3	0.542608	0.0527353	10.2893	7.87685e-25	1.32003e-23
ENSG00000005486	2680.61	-0.640682	0.0622739	-10.2881	7.97114e-25	1.33504e-23
ENSG00000106392	683.465	-0.976921	0.0949777	-10.2858	8.16689e-25	1.36701e-23
ENSG00000161533	3699.11	-0.612644	0.0595732	-10.2839	8.32987e-25	1.39346e-23
ENSG00000115993	1056.9	-0.664008	0.0645697	-10.2836	8.35508e-25	1.39685e-23
ENSG00000113240	1006.98	-0.945312	0.0919801	-10.2774	8.91397e-25	1.48941e-23
ENSG00000196182	2077.66	0.67966	0.0661484	10.2748	9.15631e-25	1.529e-23
ENSG00000153291	658.816	-0.883533	0.0860251	-10.2706	9.55618e-25	1.59482e-23
ENSG00000247095	283.561	-1.05068	0.102332	-10.2674	9.88702e-25	1.64906e-23
ENSG00000082482	3379.52	-0.730012	0.0711209	-10.2644	1.01978e-24	1.69989e-23
ENSG00000166965	1035.92	-0.66429	0.0647239	-10.2634	1.02969e-24	1.71541e-23
ENSG00000174306	1831.05	-0.555283	0.0541208	-10.2601	1.06626e-24	1.77527e-23
ENSG00000168116	282.32	-1.09113	0.106396	-10.2554	1.11939e-24	1.86263e-23
ENSG00000075151	2792.47	-0.686367	0.0669299	-10.255	1.12357e-24	1.86848e-23
ENSG00000055332	1978.52	-1.13373	0.110559	-10.2545	1.12924e-24	1.8757e-23
ENSG00000178982	4024.74	0.769008	0.0749918	10.2546	1.12893e-24	1.8757e-23
ENSG00000186166	2204.26	-0.714096	0.0696487	-10.2528	1.14933e-24	1.90795e-23
ENSG00000110987	1834.55	0.565018	0.0551174	10.2512	1.16911e-24	1.93964e-23
ENSG00000281655	62.5878	-2.48383	0.242331	-10.2497	1.18673e-24	1.96773e-23
ENSG00000280339	50.098	-4.89325	0.47745	-10.2487	1.19936e-24	1.9875e-23
ENSG00000172375	4559.48	0.486815	0.0475165	10.2452	1.24401e-24	2.06029e-23
ENSG00000158864	7872.57	0.687105	0.0670791	10.2432	1.26956e-24	2.10136e-23
ENSG00000263711	902.754	-0.835682	0.0816051	-10.2406	1.30476e-24	2.15836e-23
ENSG00000095637	810.14	0.848965	0.0829094	10.2397	1.31683e-24	2.17705e-23
ENSG00000162188	98.4348	1.80482	0.176277	10.2385	1.33234e-24	2.20141e-23
ENSG00000175455	2910.19	-0.876166	0.0856034	-10.2352	1.37945e-24	2.27791e-23
ENSG00000137124	342.112	0.956558	0.0934693	10.2339	1.39747e-24	2.30632e-23
ENSG00000100644	3186.19	-0.511093	0.0499419	-10.2338	1.3999e-24	2.30897e-23
ENSG00000100030	4000.91	-0.584417	0.0571093	-10.2333	1.40621e-24	2.31802e-23
ENSG00000101290	2219.75	-0.583362	0.0570139	-10.2319	1.42661e-24	2.35028e-23
ENSG00000062524	65.2808	2.05812	0.201409	10.2186	1.63685e-24	2.69507e-23
ENSG00000134108	2751.2	-0.638183	0.0624634	-10.2169	1.66564e-24	2.74087e-23
ENSG00000180530	1503.58	0.702355	0.0687536	10.2155	1.68954e-24	2.77858e-23
ENSG00000188766	333.216	0.996496	0.0975504	10.2152	1.69543e-24	2.78664e-23
ENSG00000138074	6036.3	-0.511455	0.0500803	-10.2127	1.73939e-24	2.85724e-23
ENSG00000063127	136.95	1.47845	0.144789	10.2111	1.76815e-24	2.90278e-23
ENSG00000079999	1971.06	0.664158	0.0650473	10.2104	1.78159e-24	2.92315e-23
ENSG00000085231	546.838	-1.06619	0.104435	-10.2091	1.80556e-24	2.96077e-23
ENSG00000132824	6613.59	-0.573898	0.056236	-10.2052	1.87972e-24	3.08059e-23
ENSG00000169239	259.442	-1.07436	0.105282	-10.2046	1.89035e-24	3.09621e-23
ENSG00000104738	7623.06	-0.582096	0.0570661	-10.2004	1.97482e-24	3.23268e-23
ENSG00000112297	2010.51	-0.693121	0.0679518	-10.2002	1.97886e-24	3.23741e-23
ENSG00000128482	74.1728	2.32231	0.227748	10.1968	2.04809e-24	3.34873e-23
ENSG00000254635	737.1	-1.16661	0.114412	-10.1966	2.05424e-24	3.35684e-23
ENSG00000075391	1456.69	-0.642404	0.0630579	-10.1875	2.2543e-24	3.68163e-23
ENSG00000198807	437.342	0.903646	0.088715	10.1859	2.29121e-24	3.73974e-23
ENSG00000105289	3148.12	0.657884	0.0646122	10.182	2.38512e-24	3.89077e-23
ENSG00000116711	42.1627	-3.71635	0.365139	-10.1779	2.48891e-24	4.05775e-23
ENSG00000110080	1743.59	0.614841	0.060414	10.1771	2.50828e-24	4.08696e-23
ENSG00000158062	1026.34	-0.644511	0.0633303	-10.177	2.51246e-24	4.09141e-23
ENSG00000125703	177.436	-1.22569	0.120441	-10.1767	2.52063e-24	4.10234e-23
ENSG00000136536	2247.97	-0.888211	0.0873027	-10.1739	2.59228e-24	4.21653e-23
ENSG00000084710	136.43	1.63854	0.161114	10.1701	2.69579e-24	4.38236e-23
ENSG00000234741	4893.6	0.552987	0.0543742	10.17	2.69852e-24	4.38429e-23
ENSG00000144043	2309.71	-0.528768	0.0520035	-10.1679	2.75682e-24	4.47643e-23
ENSG00000243317	515.642	-0.907728	0.089316	-10.1631	2.89711e-24	4.70152e-23
ENSG00000173950	1107.24	-0.91582	0.0901226	-10.1619	2.93169e-24	4.7549e-23
ENSG00000227890	106.478	10.446	1.02836	10.1579	3.05505e-24	4.95213e-23
ENSG00000107815	1035.26	0.725053	0.0713937	10.1557	3.12575e-24	5.06382e-23
ENSG00000153956	509.201	-1.06095	0.10447	-10.1555	3.13077e-24	5.06904e-23
ENSG00000101189	1724.26	0.619939	0.0610466	10.1552	3.14256e-24	5.08522e-23
ENSG00000124786	406.516	-0.940571	0.0926292	-10.1542	3.17547e-24	5.13553e-23
ENSG00000119574	1458.46	0.637667	0.0628311	10.1489	3.35103e-24	5.41635e-23
ENSG00000145779	171.054	-1.40133	0.13811	-10.1464	3.4372e-24	5.55245e-23
ENSG00000205795	60.9562	-2.3289	0.229561	-10.145	3.48688e-24	5.62947e-23
ENSG00000101040	3973.06	0.599471	0.0590925	10.1446	3.50139e-24	5.64967e-23
ENSG00000025293	4658.89	-0.648226	0.0638999	-10.1444	3.5095e-24	5.65952e-23
ENSG00000012048	2420.52	-0.792141	0.0781195	-10.1401	3.66641e-24	5.90919e-23
ENSG00000177732	2497.66	1.00476	0.099089	10.14	3.67021e-24	5.91193e-23
ENSG00000115947	796.494	-0.800091	0.078944	-10.1349	3.86688e-24	6.22517e-23
ENSG00000114166	751.636	-0.749103	0.0739359	-10.1318	3.99299e-24	6.42453e-23
ENSG00000165269	36.2621	3.3663	0.332294	10.1305	4.04659e-24	6.50705e-23
ENSG00000225828	356.843	0.893193	0.0881986	10.1271	4.19025e-24	6.73423e-23
ENSG00000119681	236.409	-1.07624	0.106298	-10.1247	4.29165e-24	6.89326e-23
ENSG00000101417	5513.89	-0.716832	0.0708378	-10.1193	4.53466e-24	7.27945e-23
ENSG00000204406	348.514	-1.07154	0.105906	-10.1179	4.60148e-24	7.38252e-23
ENSG00000114251	82.8784	-2.03689	0.201364	-10.1155	4.71613e-24	7.56216e-23
ENSG00000003249	1663.64	0.720844	0.0712948	10.1108	4.95011e-24	7.93283e-23
ENSG00000187595	192.803	1.16493	0.115229	10.1097	5.00479e-24	8.0159e-23
ENSG00000177096	450.44	0.918346	0.0909014	10.1027	5.37659e-24	8.60652e-23
ENSG00000197496	442.746	1.07706	0.106666	10.0975	5.66832e-24	9.06834e-23
ENSG00000132842	2681.17	-0.934863	0.0926232	-10.0932	5.92178e-24	9.46847e-23
ENSG00000260822	472.239	-1.21523	0.120442	-10.0898	6.13107e-24	9.79756e-23
ENSG00000169752	50.6371	-2.9035	0.287843	-10.0871	6.29961e-24	1.00612e-22
ENSG00000234256	51.7981	-5.4096	0.536302	-10.0868	6.3169e-24	1.00831e-22
ENSG00000153130	1139	-1.44492	0.143277	-10.0848	6.44882e-24	1.02879e-22
ENSG00000165338	705.909	-1.22375	0.121358	-10.0838	6.51728e-24	1.03912e-22
ENSG00000121454	634.996	0.856067	0.0849075	10.0823	6.61263e-24	1.05373e-22
ENSG00000236088	180.73	-1.46992	0.145809	-10.0812	6.6926e-24	1.06587e-22
ENSG00000175155	395.052	0.942294	0.0934764	10.0805	6.73509e-24	1.07203e-22
ENSG00000065809	2901.21	-0.679994	0.0674756	-10.0776	6.93815e-24	1.10373e-22
ENSG00000185585	103.99	1.5994	0.158747	10.0752	7.11436e-24	1.13112e-22
ENSG00000185633	93.8089	1.91662	0.190318	10.0706	7.45159e-24	1.18407e-22
ENSG00000167524	953.49	0.872273	0.086617	10.0705	7.46236e-24	1.18512e-22
ENSG00000182902	262.804	-1.18916	0.118108	-10.0684	7.61754e-24	1.20908e-22
ENSG00000088766	724.817	-0.908469	0.0902303	-10.0683	7.62536e-24	1.20964e-22
ENSG00000145075	157.161	-2.53058	0.251364	-10.0674	7.69772e-24	1.22043e-22
ENSG00000108100	2937.97	-0.482907	0.0479896	-10.0627	8.07184e-24	1.27903e-22
ENSG00000165476	2191.41	-0.948399	0.0942586	-10.0617	8.15994e-24	1.29226e-22
ENSG00000240342	4775.6	0.771378	0.0766666	10.0615	8.17736e-24	1.2943e-22
ENSG00000138646	143.266	1.50639	0.149735	10.0604	8.26931e-24	1.30812e-22
ENSG00000136238	17055	-0.879316	0.0874157	-10.059	8.38333e-24	1.32541e-22
ENSG00000179598	118.202	1.45867	0.145052	10.0562	8.62935e-24	1.36354e-22
ENSG00000138764	1811.14	-0.646987	0.0643413	-10.0556	8.683e-24	1.37125e-22
ENSG00000103479	2504.25	-0.65594	0.0652411	-10.0541	8.81333e-24	1.39106e-22
ENSG00000162004	838.783	1.00758	0.100224	10.0533	8.88747e-24	1.40197e-22
ENSG00000099910	750.758	-0.923469	0.0918675	-10.0522	8.98504e-24	1.41657e-22
ENSG00000100065	830.135	1.0496	0.104435	10.0502	9.1641e-24	1.444e-22
ENSG00000268355	46.6759	2.72463	0.271266	10.0441	9.74968e-24	1.53541e-22
ENSG00000261286	96.9039	1.60647	0.159971	10.0423	9.93725e-24	1.56408e-22
ENSG00000173166	408.545	1.05602	0.105215	10.0368	1.05076e-23	1.65293e-22
ENSG00000130270	179.071	1.47378	0.146851	10.0359	1.05999e-23	1.66651e-22
ENSG00000138778	1400.11	-0.965136	0.0961896	-10.0337	1.08397e-23	1.70327e-22
ENSG00000100106	1205.23	-0.738763	0.0736542	-10.0302	1.12328e-23	1.76406e-22
ENSG00000114735	2238.64	0.804059	0.0802027	10.0253	1.17954e-23	1.85137e-22
ENSG00000152234	15796.4	0.534059	0.0533599	10.0086	1.39675e-23	2.19109e-22
ENSG00000173848	1897.04	0.661734	0.0661466	10.004	1.4629e-23	2.29359e-22
ENSG00000232303	41.5261	2.67631	0.267558	10.0027	1.48239e-23	2.32284e-22
ENSG00000133114	696.334	-0.839454	0.0839331	-10.0015	1.50152e-23	2.35152e-22
ENSG00000186187	1540.56	0.566146	0.0566202	9.99901	1.53935e-23	2.40942e-22
ENSG00000102384	445.607	-1.16467	0.116524	-9.99511	1.60107e-23	2.50465e-22
ENSG00000115616	2666.61	0.527358	0.0527796	9.99171	1.65703e-23	2.59074e-22
ENSG00000188404	31.4475	4.09639	0.410167	9.98712	1.73543e-23	2.71183e-22
ENSG00000177485	883.349	-0.731959	0.073294	-9.98661	1.74452e-23	2.72452e-22
ENSG00000138642	519.659	0.770654	0.0771899	9.98386	1.7935e-23	2.79947e-22
ENSG00000162714	1494.12	0.623238	0.0624253	9.98374	1.79565e-23	2.80127e-22
ENSG00000114107	1832.04	-1.00286	0.100461	-9.98258	1.81682e-23	2.83273e-22
ENSG00000133519	776.743	-1.30419	0.130655	-9.98192	1.82884e-23	2.8499e-22
ENSG00000166295	1600.35	-0.532306	0.053335	-9.98042	1.85683e-23	2.89192e-22
ENSG00000080345	2095.4	-0.887233	0.0889132	-9.97865	1.89027e-23	2.94238e-22
ENSG00000132481	583.228	0.940192	0.0942679	9.97362	1.9885e-23	3.09358e-22
ENSG00000081870	1658.2	-1.05432	0.105711	-9.97355	1.98991e-23	3.09406e-22
ENSG00000175606	1200.61	-0.658189	0.0659997	-9.97261	2.00878e-23	3.12169e-22
ENSG00000005108	89.398	-1.96245	0.19679	-9.9723	2.01499e-23	3.12961e-22
ENSG00000218739	704.772	-0.930188	0.0932777	-9.97225	2.01617e-23	3.12973e-22
ENSG00000273802	444.664	0.823194	0.0825619	9.97062	2.04938e-23	3.17952e-22
ENSG00000106771	4047.06	-0.531087	0.0532909	-9.96582	2.15089e-23	3.33517e-22
ENSG00000196628	90.5358	-2.40339	0.241199	-9.96435	2.18304e-23	3.38318e-22
ENSG00000196458	2033.75	-0.606837	0.0609282	-9.95986	2.2838e-23	3.53739e-22
ENSG00000178401	1287.8	0.63274	0.0635993	9.94885	2.55102e-23	3.94911e-22
ENSG00000103657	4556.01	-0.589899	0.0593153	-9.94514	2.64805e-23	4.09708e-22
ENSG00000110711	2330.62	0.941975	0.094756	9.94106	2.75862e-23	4.26581e-22
ENSG00000067248	2647.39	-0.768192	0.0773099	-9.93652	2.88726e-23	4.46229e-22
ENSG00000119640	359.459	-0.960029	0.0966262	-9.93549	2.91728e-23	4.50622e-22
ENSG00000099250	44.782	-3.8045	0.382959	-9.93448	2.94708e-23	4.54975e-22
ENSG00000231868	234.438	1.3136	0.132271	9.93113	3.04768e-23	4.70249e-22
ENSG00000043143	1751.56	0.714073	0.0719201	9.92869	3.12331e-23	4.81656e-22
ENSG00000122565	6882.54	-0.836258	0.0842471	-9.92626	3.20037e-23	4.9327e-22
ENSG00000214413	352.88	-1.01391	0.10215	-9.92563	3.22046e-23	4.96096e-22
ENSG00000142192	37055.5	-0.466347	0.0469905	-9.92427	3.26488e-23	5.02664e-22
ENSG00000113163	1603.46	-0.614161	0.0619092	-9.92035	3.39563e-23	5.22508e-22
ENSG00000215301	10467.4	-0.570276	0.0575144	-9.91535	3.56991e-23	5.49027e-22
ENSG00000227671	1055.16	-1.07384	0.108323	-9.91332	3.6433e-23	5.60009e-22
ENSG00000178665	81.0728	-1.86923	0.188641	-9.90895	3.80622e-23	5.84733e-22
ENSG00000138795	165.631	1.19869	0.12098	9.90816	3.83655e-23	5.89071e-22
ENSG00000147642	286.086	1.02533	0.103532	9.90347	4.02075e-23	6.17018e-22
ENSG00000125746	1560.02	0.703767	0.071078	9.90133	4.10774e-23	6.30025e-22
ENSG00000154188	143.712	-1.36501	0.137868	-9.9009	4.12541e-23	6.32391e-22
ENSG00000171617	2055.67	-0.633992	0.06407	-9.8953	4.36297e-23	6.68444e-22
ENSG00000138678	110.594	1.53004	0.15469	9.89099	4.55489e-23	6.97468e-22
ENSG00000117479	1324.01	0.982718	0.0993658	9.88991	4.60452e-23	7.04686e-22
ENSG00000180230	88.1007	10.1729	1.02884	9.88776	4.70456e-23	7.19607e-22
ENSG00000215012	1561.33	-0.563754	0.0570483	-9.88204	4.98104e-23	7.61483e-22
ENSG00000141574	578.687	1.10029	0.111383	9.87846	5.16175e-23	7.88683e-22
ENSG00000279278	164.508	-1.37752	0.13948	-9.87608	5.28585e-23	8.07208e-22
ENSG00000213033	48.451	2.5982	0.263086	9.87584	5.29852e-23	8.08705e-22
ENSG00000129422	2090.96	0.724445	0.0733557	9.87578	5.30179e-23	8.08767e-22
ENSG00000053747	1873.69	-0.668372	0.067686	-9.87459	5.36515e-23	8.17989e-22
ENSG00000164040	3414.84	-0.933739	0.0945674	-9.87379	5.4084e-23	8.24138e-22
ENSG00000246705	2857.86	0.695141	0.070438	9.86883	5.68208e-23	8.65374e-22
ENSG00000277758	82.9854	-2.04671	0.207449	-9.86607	5.84085e-23	8.89075e-22
ENSG00000116685	1751.36	0.7871	0.079854	9.85674	6.40973e-23	9.75143e-22
ENSG00000145743	704.03	-0.966279	0.0980349	-9.85647	6.4267e-23	9.77198e-22
ENSG00000145063	63.0806	1.96098	0.198962	9.85605	6.45373e-23	9.80779e-22
ENSG00000226887	260.978	-1.3834	0.140369	-9.85541	6.49482e-23	9.86493e-22
ENSG00000204049	45.1866	2.53028	0.256775	9.85409	6.581e-23	9.99044e-22
ENSG00000099219	5757.42	-0.672844	0.0682821	-9.85389	6.59411e-23	1.0005e-21
ENSG00000130024	1942.43	-0.73163	0.0742649	-9.85162	6.74464e-23	1.02279e-21
ENSG00000173805	290.971	0.96043	0.0976633	9.8341	8.02842e-23	1.21681e-21
ENSG00000073910	167.859	1.23937	0.126049	9.83242	8.16338e-23	1.2366e-21
ENSG00000225684	101.512	1.54908	0.157562	9.83159	8.23101e-23	1.24618e-21
ENSG00000197969	856.362	-1.03037	0.104833	-9.8287	8.47012e-23	1.28169e-21
ENSG00000240338	33.0723	3.76854	0.383459	9.82774	8.55126e-23	1.29327e-21
ENSG00000204519	482.174	0.891644	0.0907472	9.82558	8.73677e-23	1.32062e-21
ENSG00000162623	533.263	-0.999414	0.101782	-9.81919	9.30889e-23	1.40635e-21
ENSG00000164983	675.669	-1.25249	0.1276	-9.81576	9.63141e-23	1.4543e-21
ENSG00000127957	643.745	0.726354	0.074006	9.8148	9.72321e-23	1.46737e-21
ENSG00000177879	1140.38	-0.752362	0.0766759	-9.81223	9.97357e-23	1.50435e-21
ENSG00000005884	2497.7	0.572999	0.0584195	9.80835	1.03649e-22	1.56254e-21
ENSG00000147606	40.867	-4.0194	0.409811	-9.80793	1.04077e-22	1.56816e-21
ENSG00000274925	447.778	0.776567	0.0791788	9.80777	1.0425e-22	1.56993e-21
ENSG00000106789	687.25	0.666303	0.0679425	9.80686	1.05189e-22	1.58322e-21
ENSG00000145040	53.0469	2.54534	0.259568	9.80604	1.06046e-22	1.59527e-21
ENSG00000187123	122.382	-1.72477	0.175905	-9.80514	1.07002e-22	1.6088e-21
ENSG00000241720	163.649	-1.31232	0.133883	-9.80197	1.10408e-22	1.65912e-21
ENSG00000175785	150.285	-1.33728	0.136464	-9.79952	1.1312e-22	1.69897e-21
ENSG00000157303	116.118	1.70352	0.174019	9.7893	1.25164e-22	1.87886e-21
ENSG00000148634	1469.99	-0.729133	0.074511	-9.78557	1.29857e-22	1.94827e-21
ENSG00000184702	1173.97	0.657872	0.0672621	9.78072	1.36241e-22	2.04296e-21
ENSG00000116176	41.5235	2.85781	0.292221	9.77962	1.37724e-22	2.06411e-21
ENSG00000089692	67.9472	1.99355	0.203912	9.77655	1.41964e-22	2.12652e-21
ENSG00000215386	106.082	-1.61862	0.165582	-9.77536	1.43651e-22	2.15065e-21
ENSG00000155066	6370.69	-0.706507	0.0723164	-9.76966	1.51963e-22	2.27389e-21
ENSG00000108582	8094.72	-0.804846	0.0824022	-9.76728	1.55569e-22	2.32661e-21
ENSG00000227896	348.669	0.833671	0.0853705	9.76533	1.58593e-22	2.37057e-21
ENSG00000105849	755.872	-0.695507	0.0712276	-9.76457	1.59783e-22	2.3871e-21
ENSG00000177200	1077.56	-0.824994	0.0845021	-9.76301	1.62269e-22	2.42296e-21
ENSG00000213638	282.448	1.45291	0.148841	9.76152	1.64675e-22	2.45758e-21
ENSG00000122085	927.924	0.675378	0.0691921	9.76091	1.65665e-22	2.47106e-21
ENSG00000135414	907.077	0.732272	0.0750377	9.75872	1.69275e-22	2.52357e-21
ENSG00000105373	4176.8	0.946916	0.0970479	9.7572	1.71836e-22	2.56039e-21
ENSG00000087502	2291.86	-0.762803	0.0781954	-9.75508	1.75459e-22	2.613e-21
ENSG00000138172	78.184	1.78461	0.183009	9.75147	1.81811e-22	2.70617e-21
ENSG00000185863	79.0939	1.74414	0.178958	9.74609	1.91702e-22	2.85189e-21
ENSG00000243943	400.762	-1.13509	0.116573	-9.73716	2.0933e-22	3.11249e-21
ENSG00000134333	22202.9	-0.947432	0.0973124	-9.73597	2.11777e-22	3.14722e-21
ENSG00000173614	181.318	-1.23108	0.126455	-9.73534	2.13096e-22	3.16515e-21
ENSG00000102032	52.9131	2.28072	0.234339	9.73255	2.19033e-22	3.25162e-21
ENSG00000066557	423.769	-0.973943	0.10008	-9.73159	2.21105e-22	3.28065e-21
ENSG00000013364	1023.94	0.686916	0.0705988	9.72986	2.24901e-22	3.33523e-21
ENSG00000182885	47.948	2.40482	0.247214	9.7277	2.29737e-22	3.40515e-21
ENSG00000106066	61.5047	-2.46983	0.254054	-9.72168	2.43732e-22	3.61068e-21
ENSG00000089091	279.607	-1.02484	0.105426	-9.7209	2.45609e-22	3.63658e-21
ENSG00000169762	1057.18	-0.715218	0.0736161	-9.71552	2.58931e-22	3.83183e-21
ENSG00000279184	38.939	3.12033	0.321184	9.71507	2.60065e-22	3.84659e-21
ENSG00000262468	439.799	1.33957	0.137909	9.71346	2.64213e-22	3.90589e-21
ENSG00000204130	1082.51	-0.898963	0.0925606	-9.71216	2.67607e-22	3.954e-21
ENSG00000139405	1472.43	0.708569	0.0729959	9.70698	2.81568e-22	4.1581e-21
ENSG00000106610	964.514	-0.603244	0.0621545	-9.70556	2.85499e-22	4.21394e-21
ENSG00000196659	222.633	-1.10926	0.114297	-9.70505	2.86949e-22	4.23314e-21
ENSG00000063438	473.982	0.875353	0.0901993	9.70466	2.88024e-22	4.24677e-21
ENSG00000117461	1687.54	-0.796729	0.0821145	-9.70266	2.93742e-22	4.32883e-21
ENSG00000226416	117.413	1.5643	0.161267	9.70003	3.01408e-22	4.43948e-21
ENSG00000130477	185.001	-1.27296	0.131238	-9.69962	3.02627e-22	4.45511e-21
ENSG00000120539	1171.96	-0.775748	0.0799928	-9.69773	3.0828e-22	4.53595e-21
ENSG00000143797	1298.23	-0.765075	0.0788937	-9.69753	3.08881e-22	4.54244e-21
ENSG00000142494	107.652	1.44314	0.148906	9.69164	3.27224e-22	4.80969e-21
ENSG00000124588	722.29	0.700668	0.0723114	9.68959	3.33855e-22	4.90459e-21
ENSG00000008226	58.8529	2.2537	0.232623	9.68822	3.3836e-22	4.96818e-21
ENSG00000065883	2834.9	-0.595898	0.0615338	-9.68409	3.52346e-22	5.17086e-21
ENSG00000185291	280.34	1.12883	0.116567	9.68402	3.52581e-22	5.17162e-21
ENSG00000101825	29.815	3.76269	0.38855	9.68393	3.52893e-22	5.1735e-21
ENSG00000137770	1720.43	-0.597072	0.0616593	-9.6834	3.54709e-22	5.19743e-21
ENSG00000166181	5332.62	-0.541779	0.0559599	-9.68155	3.61195e-22	5.28971e-21
ENSG00000107796	256.004	-1.47571	0.152426	-9.68146	3.61509e-22	5.29157e-21
ENSG00000135241	795.235	-0.732691	0.0756887	-9.68033	3.65532e-22	5.34768e-21
ENSG00000101400	627.83	0.807811	0.0834704	9.67782	3.74634e-22	5.47801e-21
ENSG00000232434	1090.01	0.836667	0.086488	9.6738	3.8964e-22	5.69447e-21
ENSG00000198932	174.994	1.51709	0.156883	9.67017	4.03689e-22	5.89674e-21
ENSG00000156398	4152.52	0.938831	0.0971466	9.66407	4.28511e-22	6.25608e-21
ENSG00000280088	80.4609	-2.07543	0.214781	-9.663	4.33005e-22	6.31843e-21
ENSG00000176903	1412.63	0.59852	0.0619515	9.66111	4.41046e-22	6.43243e-21
ENSG00000075407	2126.72	-0.813204	0.0841842	-9.65983	4.46622e-22	6.51039e-21
ENSG00000196850	1023.1	0.710958	0.0736077	9.65875	4.51359e-22	6.57605e-21
ENSG00000182541	5353.42	-0.446827	0.0462632	-9.65837	4.53002e-22	6.59659e-21
ENSG00000180879	2783.72	0.694954	0.0719543	9.65827	4.53435e-22	6.59948e-21
ENSG00000205476	2107.49	0.835221	0.0865044	9.65524	4.67052e-22	6.79416e-21
ENSG00000267649	56.2087	2.08926	0.216508	9.64984	4.92345e-22	7.15841e-21
ENSG00000140474	4072.31	0.597842	0.0619808	9.64561	5.13066e-22	7.45584e-21
ENSG00000136026	3551.15	0.85293	0.0884544	9.64261	5.28299e-22	7.67325e-21
ENSG00000115808	1847.18	-0.570976	0.0592153	-9.64236	5.29571e-22	7.68777e-21
ENSG00000109016	323.647	-1.13568	0.117882	-9.63402	5.74349e-22	8.33352e-21
ENSG00000153237	85.0426	-1.78784	0.185607	-9.63242	5.83396e-22	8.46044e-21
ENSG00000130635	188.291	-1.28754	0.133723	-9.62842	6.06551e-22	8.79172e-21
ENSG00000131650	556.885	1.15265	0.119719	9.62796	6.09269e-22	8.82658e-21
ENSG00000105499	186.748	1.10867	0.115169	9.62643	6.18381e-22	8.95399e-21
ENSG00000163617	538.952	-0.777356	0.0807576	-9.6258	6.222e-22	9.00467e-21
ENSG00000077454	1390.6	0.604063	0.0627656	9.62412	6.32468e-22	9.14858e-21
ENSG00000283526	197.304	1.06966	0.111154	9.62324	6.37923e-22	9.22276e-21
ENSG00000133678	1258.08	-0.863937	0.0898052	-9.62012	6.57518e-22	9.50119e-21
ENSG00000180957	1699.15	-0.611755	0.063596	-9.61939	6.62256e-22	9.56475e-21
ENSG00000163939	2021.79	-0.532086	0.0553161	-9.619	6.64717e-22	9.59539e-21
ENSG00000148942	47.9065	-2.78146	0.289324	-9.61363	7.00332e-22	1.01043e-20
ENSG00000132849	5030.37	-0.513904	0.0534692	-9.61121	7.1702e-22	1.03398e-20
ENSG00000063244	7007.91	0.498819	0.0519067	9.60991	7.26107e-22	1.04655e-20
ENSG00000257702	30.3164	3.56498	0.371245	9.60276	7.7831e-22	1.12122e-20
ENSG00000151208	14895.1	0.758493	0.0789915	9.60222	7.82396e-22	1.12653e-20
ENSG00000198681	585.859	0.952467	0.099202	9.60129	7.89464e-22	1.13613e-20
ENSG00000143207	1827.96	-0.820912	0.0855212	-9.59893	8.0775e-22	1.16185e-20
ENSG00000277496	36.8868	3.05806	0.318723	9.59472	8.41443e-22	1.2097e-20
ENSG00000197746	17380.3	0.473891	0.0494308	9.58695	9.07244e-22	1.30363e-20
ENSG00000105402	2076.58	0.475496	0.0496161	9.5835	9.38092e-22	1.34727e-20
ENSG00000075711	8484.8	-0.598083	0.0624127	-9.58272	9.45256e-22	1.35687e-20
ENSG00000131771	32.6736	3.15003	0.328733	9.58235	9.48619e-22	1.36101e-20
ENSG00000122970	1138.53	-0.891288	0.0930386	-9.57977	9.72647e-22	1.39477e-20
ENSG00000176024	824.75	-0.822721	0.0859029	-9.57733	9.9589e-22	1.42738e-20
ENSG00000105707	872.022	1.05764	0.110454	9.57544	1.01428e-21	1.453e-20
ENSG00000137460	228.399	1.26019	0.13161	9.57518	1.01683e-21	1.45591e-20
ENSG00000106991	923.495	0.933727	0.0975224	9.57449	1.02364e-21	1.46492e-20
ENSG00000260903	123.732	-1.53762	0.160598	-9.57438	1.02472e-21	1.46571e-20
ENSG00000174405	466.071	-0.938783	0.0980746	-9.57214	1.04715e-21	1.49705e-20
ENSG00000111885	997.412	0.994294	0.103878	9.57174	1.05119e-21	1.50206e-20
ENSG00000275764	106.209	-1.80842	0.18898	-9.56939	1.07539e-21	1.53586e-20
ENSG00000180385	477.547	-0.789535	0.0825266	-9.56704	1.10014e-21	1.57042e-20
ENSG00000114126	2129.81	-0.6829	0.0713816	-9.56689	1.10165e-21	1.57177e-20
ENSG00000183307	53.3328	2.17229	0.227231	9.55983	1.17948e-21	1.68196e-20
ENSG00000214562	72.9312	-2.06134	0.215668	-9.55793	1.20141e-21	1.71237e-20
ENSG00000151725	1498.41	-0.825033	0.0863221	-9.55761	1.20505e-21	1.71583e-20
ENSG00000165501	520.807	-0.808354	0.0845767	-9.55765	1.20461e-21	1.71583e-20
ENSG00000136205	7911.7	-0.724589	0.0758212	-9.55656	1.21737e-21	1.7325e-20
ENSG00000134287	10596.1	-0.443977	0.0464636	-9.55537	1.2314e-21	1.75158e-20
ENSG00000113810	5942.21	-0.910824	0.0953265	-9.55479	1.23836e-21	1.7606e-20
ENSG00000253125	31.3003	4.08152	0.427208	9.55394	1.24859e-21	1.77425e-20
ENSG00000185973	357.675	1.04689	0.109578	9.55383	1.24988e-21	1.77518e-20
ENSG00000273329	227.596	1.00541	0.10527	9.55078	1.28728e-21	1.82739e-20
ENSG00000134256	85.5429	-1.69137	0.177102	-9.55021	1.29432e-21	1.83645e-20
ENSG00000115884	2468.87	0.665039	0.0696386	9.54986	1.29876e-21	1.84182e-20
ENSG00000135723	2367.76	0.695962	0.0728949	9.54747	1.32904e-21	1.88381e-20
ENSG00000122729	1724.08	-0.567687	0.0594674	-9.54619	1.34554e-21	1.90625e-20
ENSG00000125931	29.6908	3.81909	0.400152	9.5441	1.37298e-21	1.94415e-20
ENSG00000109686	447.96	-0.870473	0.0912114	-9.54346	1.38139e-21	1.95508e-20
ENSG00000183340	466.328	-0.74244	0.0777974	-9.54324	1.38437e-21	1.95831e-20
ENSG00000168610	8276.51	-0.493644	0.0517374	-9.54133	1.41017e-21	1.99381e-20
ENSG00000123562	4665.55	-0.639137	0.0670305	-9.53501	1.49869e-21	2.11791e-20
ENSG00000254602	173.154	-1.39631	0.146467	-9.53329	1.52377e-21	2.15227e-20
ENSG00000067225	49782.3	-0.679363	0.0712666	-9.5327	1.53244e-21	2.16343e-20
ENSG00000224081	56.0511	-2.18398	0.229194	-9.52897	1.58851e-21	2.24146e-20
ENSG00000091513	38.0198	-3.64017	0.382139	-9.52578	1.63805e-21	2.31022e-20
ENSG00000271119	97.3267	1.50647	0.158176	9.52403	1.66585e-21	2.34824e-20
ENSG00000129515	1734.14	-0.698282	0.0733211	-9.52361	1.67267e-21	2.35668e-20
ENSG00000133983	81.9834	-1.73799	0.182528	-9.52176	1.7027e-21	2.3978e-20
ENSG00000128951	1693.05	-0.776082	0.0815347	-9.51842	1.7583e-21	2.47487e-20
[truncated: 26,216 more rows]

## Sheet: T72VT0, A3B, rRNA depletion
ensembl_gene_id	baseMean	log2FoldChange	lfcSE	stat	pvalue	padj
ENSG00000160862	3857.07	2.89292	0.0776864	37.2384	1.62983e-303	6.57077e-300
ENSG00000057593	575.857	4.07127	0.109911	37.0416	2.45e-300	8.64267e-297
ENSG00000244242	1051.37	3.06651	0.0846501	36.2257	2.39631e-287	7.51403e-284
ENSG00000267185	507.542	5.42539	0.153698	35.2989	6.10691e-273	1.72343e-269
ENSG00000112964	3580.52	-1.97727	0.0563296	-35.1019	6.3067e-270	1.61801e-266
ENSG00000167995	951.695	2.71872	0.0779631	34.8718	1.98675e-266	4.67235e-263
ENSG00000108231	535.361	5.34084	0.154222	34.6308	8.68307e-263	1.88496e-259
ENSG00000068976	579.618	4.21833	0.123325	34.2049	2.04803e-256	4.12839e-253
ENSG00000218336	5365.35	-1.77128	0.0518556	-34.1579	1.02181e-255	1.92244e-252
ENSG00000177119	5197.99	-1.6945	0.0503829	-33.6325	5.61164e-248	9.89788e-245
ENSG00000221995	746.605	2.92228	0.0869087	33.6247	7.31177e-248	1.2138e-244
ENSG00000116260	8627.43	1.99191	0.06098	32.665	4.90639e-234	7.69239e-231
ENSG00000217241	485.038	5.59928	0.171889	32.5749	9.2963e-233	1.38079e-229
ENSG00000107562	1859.24	2.43754	0.0758737	32.1264	1.88917e-226	2.66572e-223
ENSG00000148175	2803.94	-1.66717	0.0521152	-31.9902	1.49221e-224	2.00532e-221
ENSG00000158445	1076.75	-2.85444	0.0894436	-31.9134	1.743e-223	2.23587e-220
ENSG00000101203	700.157	7.07975	0.222326	31.844	1.59199e-222	1.95337e-219
ENSG00000145014	1998.36	2.37085	0.0748422	31.6779	3.1276e-220	3.67766e-217
ENSG00000113389	635.572	-2.85685	0.0902762	-31.6456	8.71281e-220	9.83537e-217
ENSG00000186868	2293.16	1.8772	0.0594198	31.5921	4.73375e-219	5.13812e-216
ENSG00000143776	7763.91	-1.7412	0.0551832	-31.5532	1.62203e-218	1.69538e-215
ENSG00000165272	601.641	3.26673	0.103719	31.4961	9.82931e-218	9.90689e-215
ENSG00000078018	681.43	-3.53262	0.11335	-31.1655	3.12783e-213	3.04381e-210
ENSG00000246982	477.668	-3.79184	0.12316	-30.7879	3.80162e-208	3.57618e-205
ENSG00000112759	3513.61	1.55067	0.05039	30.7733	5.95853e-208	5.42438e-205
ENSG00000170099	22182.5	1.9841	0.0647155	30.6588	2.01971e-206	1.7812e-203
ENSG00000067064	4247.06	-1.79126	0.0584486	-30.6467	2.92822e-206	2.50416e-203
ENSG00000169855	3023.43	-1.62842	0.0532819	-30.5623	3.87811e-205	3.21894e-202
ENSG00000130720	578.681	4.49689	0.14947	30.0856	7.47093e-199	6.02392e-196
ENSG00000256745	397.432	4.73289	0.158362	29.8864	2.95332e-196	2.31516e-193
ENSG00000159167	1044.48	2.50893	0.0840923	29.8355	1.35561e-195	1.03396e-192
ENSG00000180574	323.746	4.24039	0.142612	29.7337	2.81489e-194	2.0905e-191
ENSG00000151715	3049.99	-1.90853	0.0645637	-29.5604	4.82714e-192	3.49299e-189
ENSG00000183098	723.203	-3.10003	0.105154	-29.481	5.04792e-191	3.56143e-188
ENSG00000198910	2238.97	-1.99144	0.0676014	-29.4586	9.77918e-191	6.73118e-188
ENSG00000082175	13445.2	2.5153	0.085451	29.4355	1.92779e-190	1.29534e-187
ENSG00000105492	401.318	5.3721	0.183455	29.2829	1.7131e-188	1.12431e-185
ENSG00000151914	4794.82	-1.84747	0.0630944	-29.2811	1.8073e-188	1.15917e-185
ENSG00000204248	1236.56	2.61484	0.0893234	29.2739	2.23003e-188	1.39852e-185
ENSG00000116106	984.566	-2.04412	0.0701491	-29.1396	1.13193e-186	6.9444e-184
ENSG00000197565	667.023	-3.84972	0.133876	-28.7558	7.67084e-182	4.60593e-179
ENSG00000145730	2378.79	-2.21087	0.0773519	-28.582	1.12527e-179	6.61588e-177
ENSG00000115561	1414.46	-1.96329	0.0687339	-28.5636	1.90451e-179	1.09688e-176
ENSG00000175928	467.299	-4.57826	0.160566	-28.5133	8.01234e-179	4.52233e-176
ENSG00000088367	3309.28	1.70072	0.0597881	28.4457	5.50779e-178	3.04775e-175
ENSG00000166801	8302.85	-1.68925	0.0595454	-28.3691	4.86626e-177	2.64097e-174
ENSG00000176658	3640.13	-1.76625	0.063489	-27.8198	2.49924e-170	1.33078e-167
ENSG00000104361	663.144	-2.93414	0.105704	-27.758	1.39706e-169	7.30118e-167
ENSG00000136944	1291.1	2.01289	0.0725926	27.7286	3.15355e-169	1.61811e-166
ENSG00000109472	2951.71	-2.16783	0.0782125	-27.7172	4.32814e-169	2.18115e-166
ENSG00000280287	458.653	3.32695	0.121778	27.3196	2.47837e-164	1.22705e-161
ENSG00000173391	1050.72	-2.09102	0.0766154	-27.2924	5.2156e-164	2.53775e-161
ENSG00000182985	3489.07	1.55243	0.0576641	26.922	1.21531e-159	5.81309e-157
ENSG00000113946	574.7	-3.04009	0.113074	-26.886	3.20395e-159	1.50698e-156
ENSG00000185442	2366.47	-1.46099	0.0544736	-26.8202	1.88068e-158	8.70077e-156
ENSG00000169169	332.598	2.98668	0.111455	26.7971	3.4924e-158	1.58966e-155
ENSG00000163347	42446.5	-1.60894	0.0607649	-26.4782	1.72867e-154	7.7436e-152
ENSG00000164403	1829.78	1.68202	0.0638973	26.3239	1.02289e-152	4.51048e-150
ENSG00000101255	4252.89	1.73579	0.0660334	26.2866	2.73053e-152	1.18551e-149
ENSG00000180867	1148.24	2.67699	0.102511	26.1143	2.50839e-150	1.07256e-147
ENSG00000182704	1181.94	1.79264	0.068722	26.0854	5.33495e-150	2.24713e-147
ENSG00000185008	403.34	-3.90078	0.149815	-26.0374	1.86781e-149	7.7517e-147
ENSG00000131471	344.003	3.57029	0.137276	26.0081	4.00966e-149	1.63995e-146
ENSG00000070886	298.583	3.11128	0.119963	25.9354	2.65709e-148	1.07122e-145
ENSG00000066279	4493.39	-2.11997	0.0818906	-25.8878	9.13664e-148	3.63162e-145
ENSG00000117305	1426.06	1.68644	0.0652596	25.8421	2.98798e-147	1.17116e-144
ENSG00000143365	1169.01	1.89443	0.0733178	25.8386	3.26395e-147	1.26181e-144
ENSG00000107731	727.573	2.20028	0.086195	25.5268	9.93442e-144	3.78864e-141
ENSG00000186377	640.464	1.99339	0.0785378	25.3813	4.05871e-142	1.52721e-139
ENSG00000108679	3365.28	1.65332	0.0652632	25.333	1.38233e-141	5.133e-139
ENSG00000109929	3455.48	-1.39443	0.0550823	-25.3154	2.16015e-141	7.91708e-139
ENSG00000134258	2287.79	-2.33198	0.0921422	-25.3084	2.57848e-141	9.32915e-139
ENSG00000170075	453.776	2.42455	0.0959084	25.2798	5.32408e-141	1.90191e-138
ENSG00000185567	1438.44	1.5049	0.0595857	25.2561	9.70457e-141	3.38115e-138
ENSG00000196421	1656.58	2.5866	0.102413	25.2565	9.60721e-141	3.38115e-138
ENSG00000283413	706.804	-3.2984	0.130931	-25.192	4.90364e-140	1.68763e-137
ENSG00000116016	14179.1	-1.49606	0.0602812	-24.818	5.72483e-136	1.94651e-133
ENSG00000173227	972.528	1.88758	0.0768412	24.5646	3.01669e-133	1.0135e-130
ENSG00000084628	233.12	3.31505	0.135063	24.5445	4.94801e-133	1.6428e-130
ENSG00000169439	2570.05	-2.08696	0.0853517	-24.4513	4.87239e-132	1.59888e-129
ENSG00000121089	245.725	5.6344	0.231992	24.287	2.68704e-130	8.71619e-128
ENSG00000136883	254.933	2.95567	0.12173	24.2805	3.14876e-130	1.00979e-127
ENSG00000235297	309.754	6.54111	0.269759	24.248	6.94229e-130	2.20133e-127
ENSG00000245532	62290.1	-1.68045	0.0696644	-24.1221	1.46437e-128	4.59177e-126
ENSG00000215817	205.747	4.12257	0.172375	23.9163	2.07067e-126	6.42158e-124
ENSG00000188153	2397.07	-2.6521	0.111161	-23.8581	8.34924e-126	2.56113e-123
ENSG00000129625	16543.3	-1.2542	0.0526359	-23.8278	1.71997e-125	5.21929e-123
ENSG00000183963	5009.21	-1.46134	0.061397	-23.8014	3.23018e-125	9.69775e-123
ENSG00000213793	1026.18	-1.693	0.0712209	-23.7711	6.65682e-125	1.9775e-122
ENSG00000127578	590.472	2.63485	0.110901	23.7586	8.95276e-125	2.63183e-122
ENSG00000131480	352.337	2.50395	0.105477	23.7394	1.41227e-124	4.10884e-122
ENSG00000040731	328.206	-2.73034	0.115377	-23.6646	8.35835e-124	2.40695e-121
ENSG00000135374	7070.69	-1.21809	0.0515361	-23.6357	1.65668e-123	4.72254e-121
ENSG00000154975	468.718	-6.31545	0.267617	-23.5988	3.96479e-123	1.1189e-120
ENSG00000205022	227.382	3.28833	0.13971	23.5368	1.71218e-122	4.78412e-120
ENSG00000150672	818.396	-2.31639	0.09863	-23.4857	5.7109e-122	1.58007e-119
ENSG00000064300	307.974	2.96309	0.126204	23.4786	6.74557e-122	1.84822e-119
ENSG00000110013	1479.38	-1.49001	0.0635009	-23.4644	9.41751e-122	2.5555e-119
ENSG00000158258	1977.25	1.37565	0.0591325	23.2639	1.02802e-119	2.76301e-117
ENSG00000179954	265.338	2.77689	0.119534	23.2309	2.21967e-119	5.90956e-117
ENSG00000162975	445.7	2.81252	0.121115	23.2219	2.73373e-119	7.21014e-117
ENSG00000102038	2457.2	-2.1118	0.0909902	-23.2091	3.68885e-119	9.63916e-117
ENSG00000167772	1629.14	-2.09188	0.090646	-23.0775	7.79425e-118	2.018e-115
ENSG00000180389	441.955	7.15336	0.310367	23.0481	1.53831e-117	3.9466e-115
ENSG00000114270	4545.11	2.72092	0.118094	23.0403	1.83996e-117	4.67798e-115
ENSG00000253352	9060.61	-1.04472	0.0454084	-23.0072	3.94579e-117	9.94232e-115
ENSG00000166126	215.646	3.59883	0.157048	22.9155	3.25471e-116	8.12842e-114
ENSG00000078401	10262	-1.15769	0.0506612	-22.8516	1.40872e-115	3.48732e-113
ENSG00000099194	32616.8	-1.51931	0.066591	-22.8156	3.20899e-115	7.87486e-113
ENSG00000143162	4607.63	-1.39373	0.0610911	-22.814	3.33185e-115	8.10587e-113
ENSG00000174099	631.029	-2.10559	0.0924857	-22.7667	9.80554e-115	2.36515e-112
ENSG00000078804	4319.08	-1.31672	0.0578761	-22.7507	1.4134e-114	3.38029e-112
ENSG00000163993	289.909	2.61821	0.115171	22.7333	2.10034e-114	4.98099e-112
ENSG00000173114	232.773	-4.0678	0.179144	-22.7069	3.8269e-114	8.99992e-112
ENSG00000177694	371.611	-2.49068	0.109864	-22.6706	8.73765e-114	2.03789e-111
ENSG00000161638	1142.15	1.73267	0.076462	22.6606	1.09799e-113	2.53986e-111
ENSG00000156804	6894.31	-1.2228	0.0541304	-22.5898	5.45456e-113	1.25149e-110
ENSG00000163517	1093.18	1.40502	0.0622634	22.5658	9.39416e-113	2.138e-110
ENSG00000092931	1472.98	-1.54009	0.0683725	-22.5251	2.35843e-112	5.32458e-110
ENSG00000073067	322.392	3.25627	0.145066	22.4469	1.37301e-111	3.07522e-109
ENSG00000103154	186.607	4.49297	0.200218	22.4404	1.58892e-111	3.53079e-109
ENSG00000198945	614.776	-2.34208	0.104599	-22.391	4.81828e-111	1.06232e-108
ENSG00000130066	2288.39	-1.61473	0.072237	-22.3533	1.12202e-110	2.45461e-108
ENSG00000233885	447.288	1.88923	0.084687	22.3084	3.06584e-110	6.65547e-108
ENSG00000261505	616.108	2.08872	0.0936485	22.3038	3.39195e-110	7.30718e-108
ENSG00000115904	1369.72	-1.31153	0.0588134	-22.2999	3.70616e-110	7.92361e-108
ENSG00000148344	1261.76	1.81576	0.0818907	22.173	6.26073e-109	1.32845e-106
ENSG00000075223	7143.77	1.53638	0.0693171	22.1645	7.56028e-109	1.59223e-106
ENSG00000153404	4886.98	-1.4209	0.0643017	-22.0974	3.34622e-108	6.99509e-106
ENSG00000139626	310.619	2.76803	0.125732	22.0153	2.05624e-107	4.26686e-105
ENSG00000149150	164.528	3.99963	0.181866	21.9922	3.41796e-107	7.04074e-105
ENSG00000178538	809.544	1.61896	0.0737963	21.9382	1.12137e-106	2.2932e-104
ENSG00000114770	9354.32	1.22691	0.056071	21.8813	3.91561e-106	7.94982e-104
ENSG00000142303	276.826	3.08079	0.140965	21.855	6.96755e-106	1.40451e-103
ENSG00000168447	509.744	1.82531	0.0837653	21.7908	2.83833e-105	5.68088e-103
ENSG00000058668	2164.16	-1.38587	0.0636781	-21.7637	5.12021e-105	1.01759e-102
ENSG00000129159	256.999	-3.16775	0.14568	-21.7445	7.7926e-105	1.53787e-102
ENSG00000102595	760.757	-1.68758	0.0776254	-21.7401	8.56933e-105	1.67941e-102
ENSG00000108352	2226.21	1.67441	0.0770268	21.738	8.9684e-105	1.7455e-102
ENSG00000248905	2872.96	1.55485	0.0715283	21.7375	9.06344e-105	1.75191e-102
ENSG00000141753	12475.3	1.61947	0.0745633	21.7194	1.34382e-104	2.57985e-102
ENSG00000052802	1376.82	-2.43288	0.11207	-21.7085	1.70657e-104	3.25413e-102
ENSG00000124496	908.441	1.45421	0.0670555	21.6866	2.74295e-104	5.19523e-102
ENSG00000162704	4751.09	-1.05953	0.048911	-21.6625	4.63316e-104	8.71683e-102
ENSG00000225362	261.499	2.5343	0.117314	21.6027	1.69235e-103	3.16291e-101
ENSG00000143416	2839.27	1.54633	0.0716764	21.5738	3.16497e-103	5.87623e-101
ENSG00000113763	268.925	2.72583	0.126465	21.554	4.86154e-103	8.96716e-101
ENSG00000172987	426.562	2.96027	0.137551	21.5213	9.83881e-103	1.80299e-100
ENSG00000072274	74653.4	-1.38334	0.0644437	-21.4659	3.24157e-102	5.90197e-100
ENSG00000183779	3381.88	2.06252	0.0966495	21.3402	4.80756e-101	8.69706e-99
ENSG00000253506	256.644	6.74669	0.316358	21.3261	6.49632e-101	1.16772e-98
ENSG00000166734	2228.85	-1.74095	0.0816944	-21.3106	9.05854e-101	1.61798e-98
ENSG00000232931	320.817	-2.55749	0.12041	-21.2398	4.10053e-100	7.27805e-98
ENSG00000128872	689.247	-1.61546	0.0761664	-21.2097	7.77698e-100	1.37171e-97
ENSG00000042062	968.94	2.3368	0.110396	21.1674	1.90636e-99	3.34158e-97
ENSG00000095951	3068.44	-1.03544	0.0489338	-21.1599	2.23647e-99	3.89601e-97
ENSG00000196372	1556.67	1.34944	0.063799	21.1514	2.67943e-99	4.63902e-97
ENSG00000127084	229.537	2.4658	0.11662	21.1438	3.1472e-99	5.41568e-97
ENSG00000154127	220.28	-4.72505	0.223817	-21.1112	6.27846e-99	1.07384e-96
ENSG00000054654	5838.94	-1.14304	0.0541523	-21.108	6.72107e-99	1.14262e-96
ENSG00000154309	318.113	-2.53574	0.120384	-21.0638	1.70781e-98	2.886e-96
ENSG00000152284	719.94	-2.83242	0.134646	-21.0361	3.06684e-98	5.15175e-96
ENSG00000164082	275.509	2.55929	0.121687	21.0317	3.36385e-98	5.61723e-96
ENSG00000118160	232.032	2.73863	0.130254	21.0253	3.84753e-98	6.38712e-96
ENSG00000164188	211.219	-4.1249	0.19638	-21.0047	5.93584e-98	9.79622e-96
ENSG00000123358	566.375	1.66437	0.0793096	20.9858	8.84967e-98	1.45202e-95
ENSG00000260633	206.017	3.77254	0.180619	20.8867	7.07596e-97	1.15428e-94
ENSG00000115919	2947.42	-1.61669	0.0777308	-20.7986	4.45837e-96	7.23101e-94
ENSG00000130518	2002.7	1.55047	0.0745663	20.7932	4.98377e-96	8.03697e-94
ENSG00000127527	2765.28	1.21312	0.0584009	20.7724	7.69894e-96	1.2345e-93
ENSG00000116774	1786.56	1.79136	0.0865063	20.7078	2.94334e-95	4.69288e-93
ENSG00000035664	627.156	-2.69004	0.129941	-20.7021	3.31814e-95	5.26074e-93
ENSG00000100346	473.858	2.35187	0.113694	20.686	4.62687e-95	7.29468e-93
ENSG00000130558	2068.56	1.63676	0.0791271	20.6853	4.70249e-95	7.37271e-93
ENSG00000109758	186.256	3.45456	0.167103	20.6733	6.0284e-95	9.3993e-93
ENSG00000133318	12651.6	-1.18588	0.0574278	-20.6499	9.78588e-95	1.5174e-92
ENSG00000033327	3187.51	1.17222	0.0568574	20.6168	1.93974e-94	2.99134e-92
ENSG00000182240	4008.25	-1.30157	0.063437	-20.5175	1.5031e-93	2.30538e-91
ENSG00000141429	2352.71	-1.29141	0.0630033	-20.4975	2.26509e-93	3.4553e-91
ENSG00000173517	473.435	-1.76624	0.0861965	-20.4908	2.60004e-93	3.94493e-91
ENSG00000185686	2626.48	1.12192	0.0547531	20.4905	2.61806e-93	3.95103e-91
ENSG00000147403	15786.9	1.10122	0.0539318	20.4188	1.13755e-92	1.7076e-90
ENSG00000111799	18061	1.50771	0.0738414	20.4182	1.15313e-92	1.72183e-90
ENSG00000166986	11174.7	1.2103	0.0592831	20.4157	1.21377e-92	1.80283e-90
ENSG00000104427	310.28	2.27101	0.111345	20.3962	1.80568e-92	2.66797e-90
ENSG00000171401	160.013	3.40198	0.16705	20.365	3.42078e-92	5.02801e-90
ENSG00000186205	499.334	1.65966	0.081523	20.3582	3.92504e-92	5.73931e-90
ENSG00000165102	3655.53	-1.076	0.0528863	-20.3456	5.07886e-92	7.38817e-90
ENSG00000165731	287.022	2.2079	0.108522	20.3453	5.1104e-92	7.39593e-90
ENSG00000198113	332.036	2.17744	0.107058	20.3389	5.82396e-92	8.38562e-90
ENSG00000100605	2898.71	1.3385	0.0658449	20.3281	7.25056e-92	1.03867e-89
ENSG00000160180	1252.27	1.74682	0.0859987	20.3122	1.00341e-91	1.43017e-89
ENSG00000196715	1604.74	-1.12609	0.055659	-20.232	5.12014e-91	7.26108e-89
ENSG00000170835	272.226	2.19569	0.108641	20.2106	7.89735e-91	1.11436e-88
ENSG00000124767	5671.93	-1.16059	0.0574927	-20.1868	1.27998e-90	1.79714e-88
ENSG00000037280	846.257	1.6687	0.0827069	20.1761	1.58722e-90	2.21748e-88
ENSG00000259459	215.403	2.74007	0.136076	20.1364	3.54295e-90	4.9254e-88
ENSG00000006534	1305.3	1.78125	0.0886256	20.0986	7.58653e-90	1.04951e-87
ENSG00000155846	505.211	2.13927	0.106569	20.074	1.24462e-89	1.71338e-87
ENSG00000102547	756.805	-1.56303	0.0778826	-20.069	1.37768e-89	1.88735e-87
ENSG00000172296	763.666	-1.62182	0.0808614	-20.0569	1.75876e-89	2.39777e-87
ENSG00000171155	919.442	-1.52701	0.0762293	-20.0317	2.91356e-89	3.95305e-87
ENSG00000096063	2100.88	-1.19097	0.0596519	-19.9653	1.10394e-88	1.49064e-86
ENSG00000099246	7765.88	-1.48667	0.0746622	-19.912	3.20391e-88	4.3056e-86
ENSG00000213853	10470.2	-0.937338	0.047086	-19.9069	3.54289e-88	4.73858e-86
ENSG00000183888	181.983	3.02511	0.152047	19.8959	4.41796e-88	5.8811e-86
ENSG00000074527	1014.39	-1.70354	0.0859901	-19.8109	2.39912e-87	3.17866e-85
ENSG00000137573	282.115	-2.49126	0.126134	-19.7508	7.89017e-87	1.04051e-84
ENSG00000166432	409.043	-2.01437	0.102107	-19.728	1.23979e-86	1.62735e-84
ENSG00000168385	5816.04	-0.923487	0.0468159	-19.7259	1.29151e-86	1.6874e-84
ENSG00000171848	6432.66	-1.4598	0.0740726	-19.7077	1.85019e-86	2.40619e-84
ENSG00000130513	622.954	2.69565	0.136955	19.6827	3.0367e-86	3.93114e-84
ENSG00000167460	399.515	-3.67166	0.186964	-19.6384	7.27019e-86	9.36859e-84
ENSG00000162461	230.59	2.41106	0.122789	19.6358	7.6454e-86	9.80731e-84
ENSG00000120837	3316.32	-1.75047	0.0892565	-19.6117	1.22848e-85	1.56873e-83
ENSG00000117868	5103.87	-0.814589	0.0416477	-19.559	3.45561e-85	4.39283e-83
ENSG00000198053	612.96	1.60359	0.0821935	19.51	9.03444e-85	1.14332e-82
ENSG00000137944	541.311	-2.26767	0.116245	-19.5078	9.43064e-85	1.18813e-82
ENSG00000225355	341.753	7.99253	0.410824	19.4549	2.65063e-84	3.3246e-82
ENSG00000105711	215.588	2.42421	0.12515	19.3704	1.37061e-83	1.71151e-81
ENSG00000280128	409.722	-2.44353	0.126244	-19.3557	1.8255e-83	2.2695e-81
ENSG00000182472	125.37	3.82927	0.197889	19.3506	2.01549e-83	2.4947e-81
ENSG00000078124	946.48	-1.44591	0.074826	-19.3236	3.40134e-83	4.19167e-81
ENSG00000119242	898.557	-1.91407	0.0990954	-19.3155	3.98212e-83	4.88606e-81
ENSG00000170412	3910.42	1.33303	0.0691162	19.2868	6.93649e-83	8.47423e-81
ENSG00000119673	934.984	1.57302	0.081605	19.276	8.54736e-83	1.03972e-80
ENSG00000197249	3902.38	1.96094	0.101856	19.2521	1.3544e-82	1.64046e-80
ENSG00000223599	165.608	3.4787	0.180704	19.2509	1.38848e-82	1.67454e-80
ENSG00000277998	179.534	5.21598	0.271274	19.2277	2.16916e-82	2.60493e-80
ENSG00000118513	667.042	2.13848	0.111234	19.225	2.28677e-82	2.73453e-80
ENSG00000140798	1797.76	1.83057	0.0953253	19.2034	3.46732e-82	4.12875e-80
ENSG00000167771	397.89	2.03751	0.106255	19.1757	5.90803e-82	7.00549e-80
ENSG00000118194	142.29	4.05852	0.21168	19.1729	6.23596e-82	7.36339e-80
ENSG00000100889	1217.31	1.4496	0.07566	19.1594	8.07283e-82	9.49264e-80
ENSG00000106070	3280.4	1.10984	0.0579791	19.1421	1.12677e-81	1.31944e-79
ENSG00000172292	2306.13	-1.09635	0.0573439	-19.1188	1.75976e-81	2.05215e-79
ENSG00000100181	1116.78	-1.2521	0.0655665	-19.0966	2.69477e-81	3.12959e-79
ENSG00000138496	2316.19	-1.27378	0.0667031	-19.0962	2.71456e-81	3.13966e-79
ENSG00000278341	530.26	1.94572	0.102101	19.0569	5.7611e-81	6.63608e-79
ENSG00000127920	2323.27	1.07614	0.0565076	19.0441	7.34804e-81	8.42964e-79
ENSG00000185305	464.236	-2.15749	0.11335	-19.0339	8.92695e-81	1.01995e-78
ENSG00000172086	239.031	-3.60211	0.189472	-19.0113	1.37435e-80	1.56394e-78
ENSG00000214313	224.552	2.46057	0.129454	19.0072	1.48549e-80	1.68362e-78
ENSG00000154198	1015.75	-1.50202	0.0791339	-18.9807	2.46187e-80	2.77906e-78
ENSG00000250526	383.168	8.39948	0.442615	18.977	2.64445e-80	2.97327e-78
ENSG00000126878	2819.45	1.31048	0.0691243	18.9583	3.76857e-80	4.22035e-78
ENSG00000099994	217.68	2.37701	0.125607	18.9242	7.20743e-80	8.03957e-78
ENSG00000102057	1189.11	1.16489	0.061563	18.9219	7.52408e-80	8.35973e-78
ENSG00000233328	189.051	6.57779	0.34832	18.8843	1.53526e-79	1.69908e-77
ENSG00000262904	129.844	4.1825	0.221517	18.8812	1.62964e-79	1.79649e-77
ENSG00000213625	1550.65	-1.13443	0.0600937	-18.8776	1.74294e-79	1.91391e-77
ENSG00000213513	145.79	2.95949	0.156903	18.862	2.34279e-79	2.56263e-77
ENSG00000139508	1497.8	-1.41105	0.0749216	-18.8337	3.99696e-79	4.35515e-77
ENSG00000009694	210.574	-5.43617	0.288991	-18.8109	6.14978e-79	6.67511e-77
ENSG00000074370	3119.04	1.40263	0.0746781	18.7824	1.05244e-78	1.13797e-76
ENSG00000165105	1983.12	-1.04652	0.0558635	-18.7335	2.63913e-78	2.84271e-76
ENSG00000064270	793.055	1.35368	0.0723507	18.71	4.10729e-78	4.40729e-76
ENSG00000175197	1378.65	1.33363	0.0714256	18.6715	8.44102e-78	9.02325e-76
ENSG00000278540	9196.75	-0.946907	0.0508049	-18.6381	1.57667e-77	1.67906e-75
ENSG00000134824	1168.69	-1.28193	0.0688012	-18.6323	1.75691e-77	1.86397e-75
ENSG00000151651	750.941	2.16007	0.115964	18.6272	1.93555e-77	2.04581e-75
ENSG00000242265	4649.35	0.93428	0.0502819	18.5809	4.59123e-77	4.83466e-75
ENSG00000186318	2760.85	-0.903265	0.048645	-18.5685	5.77888e-77	6.06267e-75
ENSG00000150556	358.553	-2.51751	0.135675	-18.5554	7.37261e-77	7.70602e-75
ENSG00000072682	2100.48	1.02809	0.0555744	18.4994	2.08897e-76	2.17538e-74
ENSG00000125266	370.763	-2.07609	0.112244	-18.4962	2.21661e-76	2.29982e-74
ENSG00000138639	172.55	2.68314	0.145638	18.4233	8.54306e-76	8.83127e-74
ENSG00000175356	8757.24	0.989314	0.0537016	18.4224	8.68351e-76	8.94369e-74
ENSG00000146648	1038.09	-1.26622	0.0688671	-18.3864	1.68856e-75	1.73283e-73
ENSG00000076864	295.64	1.94074	0.105624	18.374	2.12038e-75	2.16809e-73
ENSG00000165507	139.61	3.07385	0.167613	18.339	4.04176e-75	4.11778e-73
ENSG00000236138	123.811	3.57954	0.195325	18.3261	5.12604e-75	5.20367e-73
ENSG00000156113	2870.02	-0.890019	0.0485911	-18.3165	6.11199e-75	6.18231e-73
ENSG00000124399	314.84	8.11607	0.443461	18.3017	8.02657e-75	8.08993e-73
ENSG00000145246	232.794	-2.36963	0.129487	-18.3002	8.24695e-75	8.28247e-73
ENSG00000197956	7446.5	-1.64101	0.0897992	-18.2742	1.32778e-74	1.32877e-72
ENSG00000131724	1473.97	-1.52854	0.0836484	-18.2734	1.34741e-74	1.34364e-72
ENSG00000227218	374.782	1.64693	0.0901653	18.2657	1.55299e-74	1.5432e-72
ENSG00000198169	1360.14	-1.11438	0.0610167	-18.2635	1.61497e-74	1.59916e-72
ENSG00000189057	3248.02	-1.89383	0.103715	-18.26	1.72283e-74	1.7e-72
ENSG00000102024	2201.22	-1.14641	0.0628278	-18.2469	2.18981e-74	2.15327e-72
ENSG00000273599	542.404	2.10242	0.115393	18.2196	3.60474e-74	3.53227e-72
ENSG00000226332	785.023	1.22729	0.0673809	18.2141	3.98596e-74	3.89231e-72
ENSG00000179387	744.461	-1.64248	0.0902064	-18.208	4.45615e-74	4.33645e-72
ENSG00000137486	2674.1	0.92635	0.0512079	18.09	3.82241e-73	3.70694e-71
ENSG00000142188	1975.56	-1.1658	0.0645749	-18.0534	7.41636e-73	7.16771e-71
ENSG00000213199	810.881	1.27719	0.0707476	18.0528	7.50502e-73	7.22864e-71
ENSG00000168398	210.429	-2.72348	0.151025	-18.0333	1.06692e-72	1.02413e-70
ENSG00000126804	1287.33	-1.37854	0.0764478	-18.0324	1.08431e-72	1.0373e-70
ENSG00000174021	1276.18	-2.2588	0.125323	-18.0238	1.26765e-72	1.2086e-70
ENSG00000114978	3139.2	-1.11109	0.0616664	-18.0178	1.4117e-72	1.3414e-70
ENSG00000137872	169.109	-3.39156	0.188537	-17.9889	2.38225e-72	2.25602e-70
ENSG00000138071	7235.11	-0.904281	0.0503701	-17.9527	4.56726e-72	4.31079e-70
ENSG00000068831	116.749	3.51766	0.195981	17.949	4.88799e-72	4.59814e-70
ENSG00000105281	6156.66	1.09836	0.0611972	17.9479	4.98425e-72	4.67311e-70
ENSG00000156110	2074.06	-1.66975	0.093144	-17.9266	7.31493e-72	6.83559e-70
ENSG00000235823	2161.34	-1.41414	0.0788901	-17.9255	7.46325e-72	6.95117e-70
ENSG00000170017	7152.12	-1.03797	0.0579365	-17.9156	8.91391e-72	8.27498e-70
ENSG00000258289	2084.45	-1.04169	0.0582474	-17.884	1.57239e-71	1.45489e-69
ENSG00000159216	1910.72	2.04208	0.114393	17.8514	2.81972e-71	2.6005e-69
ENSG00000248663	1061.66	1.3465	0.075432	17.8505	2.86224e-71	2.63111e-69
ENSG00000139687	1808.41	-1.18092	0.0661876	-17.842	3.33335e-71	3.05424e-69
ENSG00000167895	294.638	1.84092	0.103239	17.8317	4.01391e-71	3.6659e-69
ENSG00000160183	201.459	2.18373	0.122573	17.8157	5.33769e-71	4.85919e-69
ENSG00000214717	917.956	1.40875	0.0791212	17.8049	6.4697e-71	5.87078e-69
ENSG00000146242	3840.01	0.887177	0.0498451	17.7987	7.23427e-71	6.54353e-69
ENSG00000084733	2268	-1.20018	0.0676131	-17.7508	1.70016e-70	1.53291e-68
ENSG00000279954	157.684	2.95782	0.166685	17.7449	1.88587e-70	1.69494e-68
ENSG00000176463	204.136	-2.52382	0.14233	-17.7322	2.36671e-70	2.12035e-68
ENSG00000096093	2075.52	-1.71654	0.0968751	-17.7191	2.98449e-70	2.66536e-68
ENSG00000134668	1438.45	1.47245	0.0831181	17.7152	3.20098e-70	2.84968e-68
ENSG00000111328	1745.39	-1.00907	0.0569911	-17.7057	3.78814e-70	3.3618e-68
ENSG00000133136	302.872	8.19464	0.464723	17.6334	1.36556e-69	1.20807e-67
ENSG00000006747	204.761	-2.40643	0.136528	-17.6258	1.56015e-69	1.3759e-67
ENSG00000171346	7015.72	1.38543	0.0786398	17.6174	1.81058e-69	1.59179e-67
ENSG00000197847	171.941	2.64746	0.150356	17.608	2.13918e-69	1.87484e-67
ENSG00000126947	207.857	2.09524	0.119025	17.6033	2.32291e-69	2.02956e-67
ENSG00000254363	287.427	-2.0223	0.115001	-17.5851	3.20384e-69	2.79061e-67
ENSG00000173482	365.243	1.62962	0.0927737	17.5656	4.52278e-69	3.9273e-67
ENSG00000144481	213.886	-2.43229	0.138626	-17.5457	6.41369e-69	5.55217e-67
ENSG00000117472	632.21	1.42668	0.0814133	17.5239	9.41483e-69	8.12526e-67
ENSG00000131187	251.01	2.36346	0.134985	17.5091	1.22196e-68	1.05137e-66
ENSG00000031003	1636.18	-1.12701	0.064404	-17.499	1.45724e-68	1.24999e-66
ENSG00000109610	2463.61	-2.59129	0.148086	-17.4985	1.47042e-68	1.25747e-66
ENSG00000092295	220	2.07492	0.118792	17.4669	2.56069e-68	2.18324e-66
ENSG00000126351	1581.64	1.2588	0.0721391	17.4497	3.46213e-68	2.94291e-66
ENSG00000152926	339.424	-2.28515	0.131171	-17.4212	5.69912e-68	4.82988e-66
ENSG00000232630	334.281	2.15158	0.123584	17.4098	6.94692e-68	5.86974e-66
ENSG00000070961	2187.89	-1.18659	0.068192	-17.4007	8.15512e-68	6.87002e-66
ENSG00000153914	3821.34	-1.16211	0.0668388	-17.3868	1.03883e-67	8.72525e-66
ENSG00000177058	779.503	-1.2111	0.0696935	-17.3775	1.22069e-67	1.02223e-65
ENSG00000145794	140.681	-4.79153	0.275787	-17.374	1.29804e-67	1.08378e-65
ENSG00000116171	2518.34	-1.1255	0.0647831	-17.3734	1.31117e-67	1.09152e-65
ENSG00000125848	142.926	-3.42304	0.197041	-17.3722	1.3394e-67	1.11175e-65
ENSG00000185189	3284.38	-1.0671	0.0614367	-17.3691	1.41435e-67	1.17051e-65
ENSG00000129636	1997.63	-1.43882	0.0828526	-17.3661	1.49111e-67	1.23043e-65
ENSG00000135862	6371.49	-0.847397	0.0488172	-17.3586	1.69835e-67	1.39735e-65
ENSG00000112414	2368.61	-1.13022	0.0651842	-17.3388	2.39624e-67	1.96582e-65
ENSG00000185352	389.415	-1.81035	0.104498	-17.3243	3.08669e-67	2.52491e-65
ENSG00000137942	3187.54	-1.03078	0.0595958	-17.2962	5.02518e-67	4.09871e-65
ENSG00000088812	4623.32	-0.772989	0.0446949	-17.2948	5.15047e-67	4.1888e-65
ENSG00000151422	735.48	-1.35248	0.0782585	-17.2822	6.40816e-67	5.19669e-65
ENSG00000120251	220.444	7.4713	0.433297	17.2429	1.26506e-66	1.02296e-64
ENSG00000171714	347.542	-2.13811	0.124036	-17.2378	1.38146e-66	1.11389e-64
ENSG00000011295	1498.69	-1.19537	0.0694589	-17.2098	2.24254e-66	1.80304e-64
ENSG00000139793	977.937	-1.3919	0.080962	-17.192	3.05065e-66	2.44581e-64
ENSG00000163590	969.115	-2.186	0.127178	-17.1885	3.23679e-66	2.58769e-64
ENSG00000108187	995.758	-1.24819	0.0726782	-17.1741	4.14754e-66	3.30643e-64
ENSG00000102174	345.71	-1.8362	0.106957	-17.1676	4.64206e-66	3.69024e-64
ENSG00000196154	587.039	-1.45092	0.0845501	-17.1605	5.24479e-66	4.15768e-64
ENSG00000186088	292.103	-1.82292	0.106231	-17.16	5.29175e-66	4.18315e-64
ENSG00000148484	619.168	-1.77502	0.103468	-17.1553	5.73912e-66	4.52413e-64
ENSG00000174945	3792.83	1.8286	0.106668	17.143	7.09509e-66	5.57746e-64
ENSG00000112893	2538.27	-1.36383	0.079634	-17.1263	9.45272e-66	7.41014e-64
ENSG00000070540	2073.4	1.32231	0.0772898	17.1085	1.28341e-65	1.0033e-63
ENSG00000163053	606.434	1.21844	0.0712574	17.0991	1.50704e-65	1.17487e-63
ENSG00000196663	884.429	-1.20819	0.0706766	-17.0946	1.62789e-65	1.26559e-63
ENSG00000080031	145.149	3.05791	0.178916	17.0913	1.72338e-65	1.33614e-63
ENSG00000116209	5958.06	-1.10456	0.064681	-17.077	2.20179e-65	1.70238e-63
ENSG00000186470	878.842	1.15414	0.0676092	17.0708	2.45017e-65	1.88924e-63
ENSG00000186480	1764.82	-1.41928	0.0831571	-17.0675	2.59083e-65	1.99225e-63
ENSG00000128165	984.398	1.56838	0.091922	17.0621	2.84335e-65	2.18049e-63
ENSG00000089351	1796.78	1.06302	0.0623667	17.0447	3.82794e-65	2.9276e-63
ENSG00000178773	769.707	2.16869	0.127253	17.0424	3.97895e-65	3.03487e-63
ENSG00000224094	146.293	3.71215	0.217835	17.0411	4.06832e-65	3.09466e-63
ENSG00000010327	99.7563	4.19913	0.246459	17.0378	4.30314e-65	3.26449e-63
ENSG00000064042	1065.69	-1.04036	0.0610682	-17.0361	4.43405e-65	3.35478e-63
ENSG00000120925	1198.01	-1.05998	0.062243	-17.0298	4.93992e-65	3.72752e-63
ENSG00000073849	3829.32	-0.956641	0.0562451	-17.0084	7.10989e-65	5.35062e-63
ENSG00000112183	294.65	1.73053	0.101754	17.0069	7.30007e-65	5.47913e-63
ENSG00000196914	12156.3	-0.837362	0.0492534	-17.0011	8.05783e-65	6.03183e-63
ENSG00000130649	120.973	-4.06059	0.23896	-16.9928	9.29255e-65	6.9377e-63
ENSG00000115267	631.929	-1.58315	0.0931769	-16.9908	9.61037e-65	7.15605e-63
ENSG00000230590	937.061	-2.07694	0.122255	-16.9886	9.98244e-65	7.41354e-63
ENSG00000280237	627.606	1.59825	0.0943188	16.9452	2.08918e-64	1.54747e-62
ENSG00000079337	1461.93	1.29502	0.0765832	16.91	3.79954e-64	2.80699e-62
ENSG00000162078	1475.58	1.25058	0.0740343	16.8918	5.16721e-64	3.80741e-62
ENSG00000187017	3056.32	1.25211	0.0741272	16.8914	5.20552e-64	3.82565e-62
ENSG00000142166	2448.43	-0.962729	0.0571249	-16.8531	9.96369e-64	7.30351e-62
ENSG00000175305	1031.09	-1.17739	0.0699307	-16.8365	1.31846e-63	9.63942e-62
ENSG00000157613	98.1796	4.93781	0.293396	16.8299	1.47409e-63	1.07494e-61
ENSG00000136574	95.4595	4.13033	0.245605	16.817	1.8332e-63	1.33337e-61
ENSG00000136158	235.816	2.06546	0.122878	16.8091	2.09427e-63	1.51934e-61
ENSG00000111716	103.737	3.44298	0.204954	16.7988	2.4917e-63	1.80304e-61
ENSG00000197381	1263.36	-1.02774	0.0611914	-16.7955	2.63219e-63	1.89982e-61
ENSG00000170477	646.095	-1.88098	0.112016	-16.7921	2.78773e-63	2.00695e-61
ENSG00000153317	3610.38	-0.821575	0.0489326	-16.7899	2.89207e-63	2.07677e-61
ENSG00000115290	193.671	2.23245	0.133047	16.7794	3.45393e-63	2.47394e-61
ENSG00000175906	577.613	-1.77041	0.105643	-16.7584	4.92059e-63	3.51555e-61
ENSG00000185052	1244.18	-1.19475	0.0713601	-16.7425	6.42524e-63	4.57896e-61
ENSG00000070087	2388.67	-0.944468	0.0565085	-16.7138	1.04071e-62	7.39798e-61
ENSG00000189180	2469.51	-1.20792	0.0722908	-16.7091	1.12437e-62	7.97257e-61
ENSG00000196878	293.614	1.91988	0.11491	16.7077	1.15167e-62	8.14571e-61
ENSG00000114654	126.949	2.82019	0.168961	16.6914	1.51385e-62	1.06806e-60
ENSG00000231426	125.632	-3.92975	0.235578	-16.6813	1.79317e-62	1.26197e-60
ENSG00000114744	1476.12	-0.939385	0.0564021	-16.6551	2.7775e-62	1.94985e-60
ENSG00000157388	1621.54	-1.04426	0.0627013	-16.6545	2.80753e-62	1.96604e-60
ENSG00000204569	4542.94	-0.70999	0.0426952	-16.6293	4.27786e-62	2.98825e-60
ENSG00000090060	6081.09	-1.04197	0.0626593	-16.6291	4.28902e-62	2.98865e-60
ENSG00000154118	98.173	3.46107	0.208196	16.6241	4.66084e-62	3.23974e-60
ENSG00000129521	373.782	-1.92101	0.11586	-16.5805	9.64735e-62	6.68939e-60
ENSG00000196074	4959.17	-1.54632	0.0933183	-16.5703	1.14185e-61	7.8981e-60
ENSG00000213445	1043.81	1.57386	0.0951183	16.5463	1.70273e-61	1.17489e-59
ENSG00000106804	246.037	-2.12468	0.12845	-16.5409	1.86369e-61	1.28281e-59
ENSG00000137812	2139.13	-1.43711	0.0871086	-16.4979	3.79623e-61	2.60363e-59
ENSG00000073584	2316.89	-1.19574	0.0724782	-16.4979	3.80105e-61	2.60363e-59
ENSG00000143369	215.642	1.93218	0.117148	16.4935	4.08844e-61	2.7937e-59
ENSG00000221968	770.318	1.22341	0.0742001	16.488	4.47504e-61	3.05049e-59
ENSG00000014824	2299.45	-1.16631	0.0708139	-16.4701	6.02068e-61	4.09421e-59
ENSG00000272512	207.349	1.99324	0.121066	16.4641	6.64348e-61	4.50686e-59
ENSG00000153936	888.732	-1.66624	0.101249	-16.4569	7.48421e-61	5.06237e-59
ENSG00000184384	325.728	-2.24747	0.136568	-16.4568	7.49821e-61	5.06237e-59
ENSG00000173706	3344.23	-0.831138	0.0505173	-16.4526	8.04082e-61	5.41575e-59
ENSG00000159212	311.969	1.72803	0.105035	16.452	8.11137e-61	5.45026e-59
ENSG00000084636	188.626	2.3052	0.140151	16.448	8.66507e-61	5.80848e-59
ENSG00000171766	315.018	-1.98978	0.121038	-16.4393	1.00054e-60	6.69108e-59
ENSG00000122786	214.739	-3.35717	0.204486	-16.4176	1.4317e-60	9.55175e-59
ENSG00000167766	3062.74	-1.59266	0.0970594	-16.4091	1.64499e-60	1.09489e-58
ENSG00000062725	1417.79	-1.15138	0.070177	-16.4068	1.71061e-60	1.13588e-58
ENSG00000108932	637.76	1.5324	0.0935765	16.3759	2.843e-60	1.88339e-58
ENSG00000131914	1278.7	1.80046	0.109949	16.3753	2.86869e-60	1.89596e-58
ENSG00000165424	605.519	1.37504	0.0840104	16.3675	3.26376e-60	2.15203e-58
ENSG00000156973	349.905	-1.73093	0.105778	-16.3639	3.46259e-60	2.2778e-58
ENSG00000156171	1208.36	-1.57743	0.0964449	-16.3558	3.95691e-60	2.59693e-58
ENSG00000012171	712.973	1.43515	0.0878075	16.3443	4.78014e-60	3.12994e-58
ENSG00000119714	148.219	2.27127	0.138971	16.3435	4.84045e-60	3.16209e-58
ENSG00000279662	600.585	-1.68182	0.103082	-16.3155	7.66233e-60	4.99397e-58
ENSG00000110195	1163.67	1.96352	0.120355	16.3145	7.78928e-60	5.06501e-58
ENSG00000108443	1394.6	-1.00548	0.0616897	-16.2991	1.00222e-59	6.50197e-58
ENSG00000197261	667.443	1.45785	0.0894521	16.2976	1.02645e-59	6.6439e-58
ENSG00000205133	662.074	-1.53699	0.09438	-16.2851	1.25833e-59	8.12616e-58
ENSG00000122042	3347.03	-1.1699	0.0718639	-16.2794	1.38213e-59	8.90527e-58
ENSG00000160182	116.243	2.64144	0.162571	16.2479	2.31012e-59	1.48505e-57
ENSG00000146476	2025.68	-1.04972	0.0646779	-16.23	3.09522e-59	1.98523e-57
ENSG00000182022	1143.26	0.982692	0.0605516	16.229	3.14461e-59	2.01234e-57
ENSG00000110955	42053.8	0.768569	0.047367	16.2258	3.31163e-59	2.11443e-57
ENSG00000136492	668.492	-1.65818	0.102196	-16.2255	3.32883e-59	2.12061e-57
ENSG00000245869	100.7	3.26487	0.201435	16.208	4.42643e-59	2.81347e-57
ENSG00000261888	204.583	2.17115	0.134011	16.2013	4.93854e-59	3.13192e-57
ENSG00000204149	1344.15	-0.961128	0.0593518	-16.1938	5.58161e-59	3.53181e-57
ENSG00000143842	6477.29	-0.996964	0.0615887	-16.1875	6.18356e-59	3.90394e-57
ENSG00000110619	2358.2	1.0409	0.0643437	16.1773	7.29579e-59	4.59586e-57
ENSG00000147044	1033.53	-1.17669	0.0730429	-16.1095	2.18729e-58	1.37478e-56
ENSG00000005020	858.356	-1.26898	0.0789194	-16.0794	3.55647e-58	2.23038e-56
ENSG00000140575	8342.08	-1.00411	0.0624667	-16.0743	3.86464e-58	2.41827e-56
ENSG00000005844	275.182	2.07225	0.129007	16.0631	4.62997e-58	2.89076e-56
ENSG00000120471	147.543	2.26104	0.140899	16.0472	5.97844e-58	3.72445e-56
ENSG00000102265	901.572	1.97292	0.123401	15.9879	1.55297e-57	9.6322e-56
ENSG00000078114	2751.93	-1.12606	0.0704317	-15.988	1.55009e-57	9.6322e-56
ENSG00000102349	1933.4	-1.20707	0.075539	-15.9794	1.77808e-57	1.10042e-55
ENSG00000178295	1371.52	-1.59958	0.100133	-15.9746	1.92014e-57	1.18574e-55
ENSG00000227051	1001.1	-1.30913	0.0819579	-15.9732	1.96489e-57	1.21072e-55
ENSG00000177465	1279.34	1.14399	0.0716444	15.9677	2.14655e-57	1.31978e-55
ENSG00000148735	170.719	2.2867	0.143225	15.9658	2.21162e-57	1.35683e-55
ENSG00000163029	905.561	-1.35484	0.0848781	-15.9622	2.34252e-57	1.43402e-55
ENSG00000145012	2742.39	-1.25042	0.0783754	-15.9542	2.66225e-57	1.62622e-55
ENSG00000084073	2415.14	-1.10241	0.0691426	-15.9439	3.1391e-57	1.91336e-55
ENSG00000236287	2548.6	-1.28541	0.080639	-15.9403	3.3289e-57	2.02467e-55
ENSG00000188710	137.669	2.55312	0.160329	15.9242	4.30341e-57	2.61175e-55
ENSG00000101871	1516.43	-0.91407	0.0574228	-15.9182	4.73651e-57	2.86843e-55
ENSG00000159763	17882.1	2.0184	0.12687	15.9092	5.47283e-57	3.30725e-55
ENSG00000213366	1657.85	-1.04411	0.0656603	-15.9016	6.17409e-57	3.72306e-55
ENSG00000168056	8993.67	0.826236	0.0519767	15.8963	6.72427e-57	4.04618e-55
ENSG00000255622	350.329	-1.49565	0.0940898	-15.896	6.75597e-57	4.0566e-55
ENSG00000138160	4948.32	-0.84057	0.0528898	-15.8928	7.10256e-57	4.25566e-55
ENSG00000047346	3360.59	-1.13806	0.0716164	-15.891	7.30942e-57	4.37032e-55
ENSG00000257354	277.663	-1.66781	0.105043	-15.8775	9.0774e-57	5.41593e-55
ENSG00000280081	1805.53	0.976606	0.0615407	15.8693	1.03442e-56	6.15876e-55
ENSG00000073711	735.092	-1.24303	0.0783795	-15.8591	1.2162e-56	7.22576e-55
ENSG00000115461	39292.7	-0.772363	0.0487061	-15.8576	1.24556e-56	7.38466e-55
ENSG00000164144	1031.85	-1.13344	0.0715449	-15.8424	1.5859e-56	9.38273e-55
ENSG00000185838	268.725	2.291	0.144643	15.839	1.67537e-56	9.89134e-55
ENSG00000172057	3842	-0.791481	0.0499863	-15.834	1.81434e-56	1.06895e-54
ENSG00000198944	1070.11	1.20862	0.076338	15.8325	1.85687e-56	1.09172e-54
ENSG00000182400	1510.3	-1.35024	0.0852858	-15.8319	1.87414e-56	1.09959e-54
ENSG00000149260	481.339	1.37944	0.0871445	15.8293	1.9542e-56	1.14418e-54
ENSG00000244119	130.226	-3.03766	0.192151	-15.8087	2.70916e-56	1.58292e-54
ENSG00000122484	605.859	-1.29797	0.0822032	-15.7898	3.65623e-56	2.13187e-54
ENSG00000164626	135.487	2.58694	0.163864	15.7871	3.81948e-56	2.22247e-54
ENSG00000260565	1141.59	-1.23538	0.078352	-15.767	5.2468e-56	3.0467e-54
ENSG00000158769	4624.97	-0.756121	0.0479765	-15.7602	5.84169e-56	3.38518e-54
ENSG00000179698	254.323	1.90458	0.120855	15.7592	5.93958e-56	3.43485e-54
ENSG00000257093	2947.53	-0.756125	0.047988	-15.7565	6.19282e-56	3.57398e-54
ENSG00000129534	1168	-1.26599	0.0804058	-15.745	7.43741e-56	4.28349e-54
ENSG00000164292	1108.95	-1.23611	0.0785576	-15.7351	8.69356e-56	4.99676e-54
ENSG00000116678	279.728	-2.00747	0.127611	-15.7312	9.24655e-56	5.3038e-54
ENSG00000185168	327.715	1.99166	0.126858	15.6999	1.51528e-55	8.67396e-54
ENSG00000261612	111.938	5.08892	0.324157	15.6989	1.53812e-55	8.78688e-54
ENSG00000139734	1139.68	-1.59555	0.10168	-15.6918	1.72051e-55	9.80897e-54
ENSG00000187079	3050.83	-0.953215	0.0607721	-15.6851	1.91372e-55	1.08885e-53
ENSG00000116005	3399.19	-0.795772	0.0507532	-15.6793	2.09686e-55	1.19065e-53
ENSG00000272888	1124.71	-1.34503	0.0858843	-15.6609	2.79857e-55	1.58591e-53
ENSG00000147862	5254.1	-0.806563	0.0515427	-15.6484	3.40489e-55	1.92564e-53
ENSG00000148842	883.097	1.30118	0.0832499	15.6299	4.55705e-55	2.57209e-53
ENSG00000139211	1994.18	1.18174	0.0756238	15.6265	4.80461e-55	2.7064e-53
ENSG00000138449	14577.8	-1.18654	0.0759463	-15.6234	5.04344e-55	2.83528e-53
ENSG00000180834	556.387	1.59851	0.102402	15.6101	6.21136e-55	3.47799e-53
ENSG00000169084	358.321	-1.88567	0.120798	-15.6102	6.20777e-55	3.47799e-53
ENSG00000159166	1113.72	1.45586	0.0933168	15.6013	7.13081e-55	3.98492e-53
ENSG00000108821	3951.01	1.02442	0.0657234	15.5869	8.93728e-55	4.98456e-53
ENSG00000160712	323.758	1.62154	0.104085	15.5791	1.0097e-54	5.62025e-53
ENSG00000156650	1768.68	0.836731	0.0537497	15.5672	1.21642e-54	6.75759e-53
ENSG00000104419	5890.27	-0.945671	0.0607636	-15.5631	1.29653e-54	7.18846e-53
ENSG00000173621	938.276	1.55999	0.100258	15.5598	1.36592e-54	7.55837e-53
ENSG00000137941	410.841	-1.52981	0.0984551	-15.5381	1.91461e-54	1.05738e-52
ENSG00000137845	3607.41	-0.907751	0.0584246	-15.5371	1.94484e-54	1.07198e-52
ENSG00000214756	411.279	1.53087	0.0985542	15.5333	2.06489e-54	1.13593e-52
ENSG00000011426	7531.04	-1.04572	0.0674441	-15.505	3.21063e-54	1.76279e-52
ENSG00000165802	2132.1	0.982263	0.0633855	15.4967	3.65453e-54	2.00261e-52
ENSG00000061273	7212.03	1.2934	0.083605	15.4704	5.49824e-54	3.00709e-52
ENSG00000163545	254.816	1.92999	0.124871	15.4558	6.89378e-54	3.76305e-52
ENSG00000152818	4261.86	-0.837741	0.0542984	-15.4285	1.05319e-53	5.7374e-52
ENSG00000185432	3142.42	-1.15341	0.0747591	-15.4284	1.05514e-53	5.7374e-52
ENSG00000147459	2140.89	-1.25413	0.0813791	-15.4109	1.38261e-53	7.5036e-52
ENSG00000119943	670.721	1.31276	0.0852673	15.3958	1.7462e-53	9.45866e-52
ENSG00000204624	141.312	2.42429	0.157508	15.3915	1.86601e-53	1.00883e-51
ENSG00000185924	1040.92	1.01795	0.0662708	15.3605	3.0143e-53	1.62651e-51
ENSG00000144935	170.311	-2.68976	0.175114	-15.3601	3.03133e-53	1.63258e-51
ENSG00000135932	1280.57	-1.03697	0.0675649	-15.3478	3.66536e-53	1.97029e-51
ENSG00000186517	358.719	1.56948	0.102276	15.3455	3.79633e-53	2.03681e-51
ENSG00000124762	2517.05	-0.851962	0.0555473	-15.3376	4.28841e-53	2.29645e-51
ENSG00000134255	1303.15	-1.43798	0.093772	-15.3349	4.47021e-53	2.38928e-51
ENSG00000110448	220.599	2.02504	0.132082	15.3317	4.69507e-53	2.50472e-51
ENSG00000143375	4646.19	-0.718352	0.0469333	-15.3058	6.99277e-53	3.72345e-51
ENSG00000259768	458.603	-1.55259	0.101446	-15.3046	7.12309e-53	3.7857e-51
ENSG00000163171	957.882	-1.93769	0.126654	-15.2991	7.75132e-53	4.11184e-51
ENSG00000198691	258.662	1.91725	0.125332	15.2974	7.95857e-53	4.21386e-51
ENSG00000010319	136.421	2.26357	0.147998	15.2946	8.30793e-53	4.3906e-51
ENSG00000182670	14364.3	-0.801575	0.0524166	-15.2924	8.59659e-53	4.53466e-51
ENSG00000224660	537.037	-1.27561	0.0834454	-15.2867	9.37741e-53	4.93731e-51
ENSG00000104154	255.877	-2.22065	0.145431	-15.2694	1.22246e-52	6.4244e-51
ENSG00000134291	9780.8	-0.704448	0.0461579	-15.2617	1.37631e-52	7.21949e-51
ENSG00000197535	2411.12	-0.743986	0.0487684	-15.2555	1.51368e-52	7.92535e-51
ENSG00000168003	9395.59	0.864436	0.0566873	15.2492	1.66673e-52	8.7105e-51
ENSG00000118162	725.595	1.31318	0.0861213	15.248	1.6969e-52	8.85182e-51
ENSG00000228672	1829.63	1.5119	0.0991885	15.2427	1.84008e-52	9.58095e-51
ENSG00000167740	739.092	-1.20902	0.0793282	-15.2407	1.89806e-52	9.86469e-51
ENSG00000184254	254.53	-1.65914	0.108899	-15.2356	2.05189e-52	1.06446e-50
ENSG00000167992	494.613	1.4648	0.096182	15.2294	2.25607e-52	1.16609e-50
ENSG00000100031	772.834	1.0942	0.0718475	15.2295	2.25244e-52	1.16609e-50
ENSG00000121486	1407.97	-1.17424	0.0771269	-15.2248	2.42006e-52	1.24857e-50
ENSG00000261578	225.997	1.92038	0.126139	15.2244	2.43587e-52	1.25443e-50
ENSG00000123143	2537.26	1.13897	0.0748522	15.2162	2.75942e-52	1.41846e-50
ENSG00000186510	79.3957	4.23476	0.278537	15.2036	3.34873e-52	1.71826e-50
ENSG00000186891	171.208	2.34636	0.154446	15.1921	3.98882e-52	2.04299e-50
ENSG00000126562	655.017	1.12657	0.0741611	15.1909	4.06517e-52	2.07832e-50
ENSG00000163141	2757.02	-0.871247	0.0573617	-15.1887	4.20405e-52	2.14543e-50
ENSG00000122741	1183.34	-0.983864	0.0648371	-15.1744	5.22645e-52	2.66238e-50
ENSG00000141519	420.605	-1.45201	0.0957356	-15.1668	5.86401e-52	2.98177e-50
ENSG00000168028	21605.7	0.889852	0.0586735	15.1662	5.92383e-52	3.00677e-50
ENSG00000102316	14924.2	0.842479	0.0555577	15.164	6.11782e-52	3.09966e-50
ENSG00000143127	602.68	1.44518	0.0954148	15.1463	8.01154e-52	4.05186e-50
ENSG00000015532	3167.82	1.12099	0.0741192	15.1242	1.12213e-51	5.66507e-50
ENSG00000047056	1640.62	-0.9557	0.0632891	-15.1005	1.60604e-51	8.09357e-50
ENSG00000109180	2796.92	-1.2276	0.0813792	-15.0849	2.03576e-51	1.02409e-49
ENSG00000111371	17199	-0.777885	0.0516412	-15.0633	2.8247e-51	1.41843e-49
ENSG00000135407	465.058	1.24266	0.0825892	15.0463	3.65159e-51	1.8304e-49
ENSG00000145990	297.294	1.5888	0.10563	15.0411	3.94919e-51	1.97606e-49
ENSG00000136840	257.75	1.86115	0.123781	15.0359	4.27483e-51	2.13522e-49
ENSG00000083642	2646.27	-1.19834	0.0797535	-15.0255	4.99568e-51	2.49087e-49
ENSG00000188549	265.273	1.82081	0.121283	15.013	6.03671e-51	3.00462e-49
ENSG00000224781	76.8879	3.97152	0.264581	15.0106	6.25772e-51	3.10914e-49
ENSG00000250067	1494.13	0.996414	0.0664099	15.004	6.91194e-51	3.42815e-49
ENSG00000164953	696.185	-1.14515	0.0763413	-15.0004	7.29733e-51	3.61295e-49
ENSG00000119801	1215.97	-0.864631	0.057669	-14.993	8.15972e-51	4.03284e-49
ENSG00000131620	996.355	1.02465	0.0683475	14.9918	8.30221e-51	4.09609e-49
ENSG00000139410	803.95	1.29129	0.0861585	14.9874	8.87857e-51	4.37281e-49
ENSG00000070669	1668.59	1.17224	0.078264	14.9781	1.02165e-50	5.02301e-49
ENSG00000149218	1045.48	1.09047	0.0728278	14.9732	1.09858e-50	5.39182e-49
ENSG00000164329	1508.04	-0.995418	0.0665255	-14.9629	1.28219e-50	6.28207e-49
ENSG00000100060	274.751	2.18421	0.145978	14.9626	1.28895e-50	6.30425e-49
ENSG00000170049	516.228	1.30741	0.08743	14.9537	1.47255e-50	7.18977e-49
ENSG00000153037	326.475	-1.47815	0.0988733	-14.9499	1.55937e-50	7.60054e-49
ENSG00000120549	2359.04	-0.990746	0.066314	-14.9402	1.80345e-50	8.77503e-49
ENSG00000163412	614.083	-1.13637	0.0760646	-14.9396	1.82199e-50	8.84998e-49
ENSG00000164237	1453.27	0.982958	0.0658277	14.9323	2.03151e-50	9.85072e-49
ENSG00000204839	1850.04	1.28875	0.086404	14.9154	2.61656e-50	1.26659e-48
ENSG00000171033	148.36	2.37444	0.159259	14.9093	2.86612e-50	1.38501e-48
ENSG00000073969	2758.45	-1.00903	0.0676805	-14.9088	2.89013e-50	1.39423e-48
ENSG00000036672	643.714	1.39666	0.0936881	14.9076	2.94238e-50	1.41701e-48
ENSG00000136631	2574.95	-0.97362	0.0653249	-14.9043	3.09173e-50	1.4864e-48
ENSG00000106688	122.975	-2.91435	0.195618	-14.8982	3.38634e-50	1.62527e-48
ENSG00000100997	2563.02	-0.946626	0.063588	-14.8869	4.0123e-50	1.92243e-48
ENSG00000105048	3017.59	1.26389	0.0850061	14.8682	5.30108e-50	2.53562e-48
ENSG00000066933	1890.57	-1.12017	0.0753587	-14.8645	5.59982e-50	2.67398e-48
ENSG00000147576	440.997	-1.22705	0.0825691	-14.8609	5.90921e-50	2.81696e-48
ENSG00000242498	3609.46	-1.02426	0.0689313	-14.8591	6.07594e-50	2.89155e-48
ENSG00000097046	504.37	-1.37795	0.0927505	-14.8565	6.3115e-50	2.9986e-48
ENSG00000183291	1901.54	-0.97763	0.0658311	-14.8506	6.89571e-50	3.27065e-48
ENSG00000185630	13059	-0.774534	0.0521766	-14.8445	7.55456e-50	3.57713e-48
ENSG00000135424	478.655	1.65533	0.111539	14.8409	7.97304e-50	3.76896e-48
ENSG00000122711	83.6793	5.03888	0.339549	14.8399	8.08472e-50	3.81537e-48
ENSG00000106692	2281.2	-1.01306	0.0682733	-14.8382	8.28997e-50	3.9057e-48
ENSG00000197599	286.161	1.79715	0.121144	14.8348	8.72866e-50	4.10552e-48
ENSG00000165996	266.865	-1.69453	0.114299	-14.8255	1.0027e-49	4.70836e-48
ENSG00000050130	2414.76	-0.995678	0.0671927	-14.8183	1.11644e-49	5.23371e-48
ENSG00000078140	2347.52	-0.918579	0.0619949	-14.817	1.13743e-49	5.32329e-48
ENSG00000276966	215.083	1.8596	0.12566	14.7987	1.49352e-49	6.97824e-48
ENSG00000171320	674.207	-1.59676	0.108009	-14.7836	1.8684e-49	8.71541e-48
ENSG00000204843	3199.06	0.97496	0.065975	14.7777	2.03975e-49	9.49895e-48
ENSG00000108797	380.392	1.332	0.0903378	14.7446	3.33181e-49	1.54904e-47
ENSG00000101846	200.366	-1.86388	0.126491	-14.7353	3.82332e-49	1.77464e-47
ENSG00000164171	1389.03	-0.824802	0.056002	-14.7281	4.25515e-49	1.97183e-47
ENSG00000173991	153.139	2.28536	0.155216	14.7237	4.53978e-49	2.10028e-47
ENSG00000186376	247.49	-1.63501	0.111124	-14.7134	5.28917e-49	2.44297e-47
ENSG00000249915	4715.18	-0.734968	0.0499691	-14.7085	5.68923e-49	2.62346e-47
ENSG00000196517	710.108	1.13951	0.0774825	14.7067	5.84117e-49	2.68475e-47
ENSG00000126561	285.119	1.56155	0.106179	14.7067	5.83806e-49	2.68475e-47
ENSG00000034677	1623.19	-1.16934	0.0795375	-14.7017	6.28659e-49	2.88478e-47
ENSG00000136731	3911.44	-0.697196	0.0474309	-14.6992	6.52383e-49	2.98878e-47
ENSG00000171236	77.4764	4.18024	0.284419	14.6975	6.69059e-49	3.06021e-47
ENSG00000136444	2222.68	0.787866	0.0536753	14.6784	8.87015e-49	4.05056e-47
ENSG00000181788	3021.98	1.09165	0.0743927	14.6741	9.44727e-49	4.30713e-47
ENSG00000124920	454.973	1.49299	0.101781	14.6686	1.0245e-48	4.66329e-47
ENSG00000260284	109.474	2.89666	0.19755	14.6629	1.11377e-48	5.06148e-47
ENSG00000177054	433.505	-1.29219	0.0881606	-14.6572	1.21116e-48	5.49518e-47
ENSG00000153006	565.089	-1.34052	0.0914982	-14.6508	1.33231e-48	6.03518e-47
ENSG00000134533	853.059	1.21445	0.0829563	14.6396	1.57056e-48	7.103e-47
ENSG00000124942	93596.5	-0.686145	0.0468749	-14.6378	1.61249e-48	7.28096e-47
ENSG00000163873	2154.86	-0.970061	0.0662814	-14.6355	1.66749e-48	7.51728e-47
ENSG00000183010	3811.89	1.10778	0.0757001	14.6338	1.71049e-48	7.69883e-47
ENSG00000149231	154.575	-2.29208	0.156682	-14.6289	1.83754e-48	8.25752e-47
ENSG00000135842	3234.9	0.848389	0.0580115	14.6245	1.96036e-48	8.79543e-47
ENSG00000149599	278.984	1.67734	0.114873	14.6016	2.74183e-48	1.22821e-46
ENSG00000131374	2956.21	-0.845578	0.05793	-14.5966	2.95385e-48	1.32109e-46
ENSG00000186642	82.8341	5.62777	0.385767	14.5885	3.32386e-48	1.48422e-46
ENSG00000198879	781.96	1.1145	0.0764036	14.5871	3.3954e-48	1.51377e-46
ENSG00000237438	1026.07	-0.960826	0.0658702	-14.5867	3.41475e-48	1.51999e-46
ENSG00000102580	2939.87	-0.82148	0.0563214	-14.5856	3.46891e-48	1.54167e-46
ENSG00000278041	269.743	1.81687	0.124635	14.5776	3.9027e-48	1.73173e-46
ENSG00000196924	26595.8	1.06568	0.0731329	14.5718	4.24388e-48	1.88017e-46
ENSG00000203879	5511.86	1.01465	0.0696496	14.5679	4.49645e-48	1.98894e-46
ENSG00000132549	2968.58	-1.04339	0.0716423	-14.5639	4.76554e-48	2.10467e-46
ENSG00000151150	1927.68	-1.14519	0.0786778	-14.5555	5.38928e-48	2.37642e-46
ENSG00000263235	201.898	1.7379	0.119427	14.552	5.67255e-48	2.49742e-46
ENSG00000137672	81.7907	3.28632	0.2259	14.5477	6.04075e-48	2.65539e-46
ENSG00000099769	89.103	2.68915	0.184968	14.5385	6.91088e-48	3.03316e-46
ENSG00000180773	478.683	-1.5449	0.106309	-14.5322	7.57691e-48	3.32031e-46
ENSG00000090530	111.807	-2.76844	0.190632	-14.5224	8.73868e-48	3.82348e-46
ENSG00000067715	534.111	-1.45929	0.100697	-14.4918	1.36514e-47	5.96371e-46
ENSG00000159200	5627.38	-1.07584	0.0742848	-14.4826	1.56049e-47	6.80658e-46
ENSG00000170469	485.564	1.35522	0.0935877	14.4808	1.60248e-47	6.97897e-46
ENSG00000169604	328.603	-1.93626	0.133716	-14.4804	1.61235e-47	7.01109e-46
ENSG00000075884	188.369	-2.69409	0.186103	-14.4764	1.70857e-47	7.4181e-46
ENSG00000143153	2987.76	-1.21788	0.0842911	-14.4485	2.56051e-47	1.10999e-45
ENSG00000198420	1830.62	-0.796211	0.0551263	-14.4434	2.75862e-47	1.19403e-45
ENSG00000110031	200.721	-1.77695	0.123166	-14.4273	3.48604e-47	1.50658e-45
ENSG00000230989	4990.98	-1.02841	0.0712842	-14.4269	3.50621e-47	1.51298e-45
ENSG00000137203	5780.53	-0.79359	0.0550676	-14.4112	4.39984e-47	1.89569e-45
ENSG00000145725	1532.35	-1.00703	0.0699972	-14.3867	6.27334e-47	2.69878e-45
ENSG00000136826	494.415	1.34459	0.0934643	14.3862	6.31924e-47	2.71439e-45
ENSG00000196776	2784.38	-1.11328	0.0774011	-14.3832	6.59483e-47	2.82846e-45
ENSG00000121068	376.68	1.40401	0.0976759	14.3742	7.51277e-47	3.21727e-45
ENSG00000085276	491.389	-1.31859	0.091844	-14.3569	9.64826e-47	4.12551e-45
ENSG00000164168	1281.6	-0.811027	0.0564979	-14.355	9.91556e-47	4.23339e-45
ENSG00000185436	447.746	1.5882	0.110695	14.3476	1.1036e-46	4.70463e-45
ENSG00000254285	1798.48	-1.34845	0.0940276	-14.341	1.21279e-46	5.16231e-45
ENSG00000213073	265.805	1.70244	0.118803	14.33	1.422e-46	6.04372e-45
ENSG00000144061	228.159	-1.69613	0.118373	-14.3287	1.44791e-46	6.14456e-45
ENSG00000105245	1136.84	1.00078	0.0699417	14.3088	1.928e-46	8.16968e-45
ENSG00000198162	1598.28	-0.935825	0.0654164	-14.3057	2.01695e-46	8.53377e-45
ENSG00000213463	2416.37	-0.869848	0.0608236	-14.3012	2.15193e-46	9.09128e-45
ENSG00000140675	74.8551	3.5745	0.250002	14.2979	2.25543e-46	9.51428e-45
ENSG00000137414	1640.83	-0.928954	0.0649891	-14.294	2.38515e-46	1.00465e-44
ENSG00000259291	458.299	-1.39048	0.0973847	-14.2782	2.99173e-46	1.25826e-44
ENSG00000106948	634.787	1.30287	0.0912579	14.2768	3.05519e-46	1.28304e-44
ENSG00000123219	729.313	-1.73686	0.121722	-14.2691	3.40907e-46	1.42953e-44
ENSG00000165156	2401	-0.835306	0.0586006	-14.2542	4.22003e-46	1.76697e-44
ENSG00000138698	573.261	-1.36435	0.0957579	-14.248	4.61632e-46	1.93003e-44
ENSG00000106780	1396.48	-0.811169	0.0569479	-14.2441	4.88063e-46	2.03752e-44
ENSG00000174485	1034.77	-1.05403	0.0740124	-14.2412	5.08531e-46	2.11983e-44
ENSG00000215105	509.185	1.23936	0.0870524	14.237	5.40263e-46	2.24878e-44
ENSG00000146918	2497.94	-0.751823	0.0528095	-14.2365	5.43688e-46	2.25971e-44
ENSG00000091536	229.374	1.79942	0.12642	14.2337	5.65934e-46	2.34871e-44
ENSG00000163807	1663.31	-0.775553	0.054492	-14.2324	5.76572e-46	2.38934e-44
ENSG00000166575	1923.67	-1.45765	0.102449	-14.228	6.14239e-46	2.54171e-44
ENSG00000077147	10503.8	-1.11268	0.0782912	-14.2121	7.71075e-46	3.18602e-44
ENSG00000102144	12947.3	-0.740049	0.0521426	-14.1928	1.01535e-45	4.18919e-44
ENSG00000214530	5507.95	1.10302	0.0778215	14.1737	1.33218e-45	5.48838e-44
ENSG00000138760	4317.03	-0.865219	0.0612133	-14.1345	2.32855e-45	9.57928e-44
ENSG00000225402	91.2251	6.18802	0.437813	14.134	2.34596e-45	9.63688e-44
ENSG00000101974	336.531	-1.48873	0.105358	-14.1302	2.47463e-45	1.01507e-43
ENSG00000181260	75.1805	5.4812	0.388048	14.1251	2.66123e-45	1.09002e-43
ENSG00000196684	167.194	1.87502	0.132759	14.1236	2.7191e-45	1.11211e-43
ENSG00000102996	753.873	1.40138	0.0992645	14.1176	2.95797e-45	1.20806e-43
ENSG00000234420	1431.62	-1.08327	0.0768157	-14.1021	3.68493e-45	1.50278e-43
ENSG00000011258	1033.17	-1.13954	0.0808166	-14.1004	3.77829e-45	1.53863e-43
ENSG00000143771	1999.07	-1.02376	0.0726246	-14.0966	3.98735e-45	1.62142e-43
ENSG00000162368	1269.01	-1.24468	0.0883654	-14.0856	4.65899e-45	1.89182e-43
ENSG00000152518	3439.67	-1.01301	0.0720012	-14.0693	5.86357e-45	2.37753e-43
ENSG00000254122	206.539	1.77379	0.126113	14.0651	6.22499e-45	2.52045e-43
ENSG00000135698	2186.17	-1.44249	0.102579	-14.0623	6.47443e-45	2.61769e-43
ENSG00000279117	1070.05	1.21003	0.086061	14.0601	6.68036e-45	2.69709e-43
ENSG00000128791	912.006	-1.42341	0.101327	-14.0478	7.95013e-45	3.20515e-43
ENSG00000161243	293.434	1.33047	0.0947384	14.0436	8.43109e-45	3.39421e-43
ENSG00000169220	459.534	1.22326	0.0871399	14.0378	9.14547e-45	3.67656e-43
ENSG00000167207	344.383	1.82511	0.130035	14.0355	9.44971e-45	3.79346e-43
ENSG00000015171	4294.49	-0.775986	0.0553023	-14.0317	9.97373e-45	3.99814e-43
ENSG00000123992	2215.62	0.877801	0.0626122	14.0197	1.18194e-44	4.7313e-43
ENSG00000158850	3297.48	0.746487	0.0533	14.0054	1.44522e-44	5.77698e-43
ENSG00000169851	113.238	-2.67412	0.190967	-14.003	1.49385e-44	5.96292e-43
ENSG00000053770	1285.79	-0.977878	0.069848	-14.0001	1.55691e-44	6.20587e-43
ENSG00000228224	63.528	4.05705	0.289919	13.9937	1.70216e-44	6.77525e-43
ENSG00000257621	1986.39	-1.20771	0.0863194	-13.9911	1.76611e-44	7.01993e-43
ENSG00000105953	5229.95	0.754705	0.0539683	13.9842	1.94566e-44	7.72273e-43
ENSG00000198835	63.4889	4.10089	0.293268	13.9834	1.96759e-44	7.7988e-43
ENSG00000215915	496.21	1.48173	0.105965	13.9833	1.97228e-44	7.80642e-43
ENSG00000067167	4888.39	-1.47312	0.105356	-13.9823	2.00011e-44	7.90548e-43
ENSG00000182199	7997.84	0.917735	0.0656363	13.9821	2.00412e-44	7.91025e-43
ENSG00000005810	2128.51	-0.811481	0.0580773	-13.9724	2.29627e-44	9.0507e-43
ENSG00000158555	872.652	1.37706	0.0985714	13.9701	2.37171e-44	9.33499e-43
ENSG00000018408	1573.08	-0.924509	0.0662124	-13.9628	2.62934e-44	1.03346e-42
ENSG00000127946	4019.54	0.70078	0.0501921	13.962	2.65987e-44	1.04401e-42
ENSG00000071967	1840.17	-0.996653	0.0713868	-13.9613	2.68461e-44	1.05226e-42
ENSG00000228630	1594.56	-0.903183	0.0647069	-13.9581	2.80953e-44	1.09969e-42
ENSG00000170540	8151.25	-1.27622	0.0914436	-13.9564	2.877e-44	1.12454e-42
ENSG00000227008	70.2003	3.32707	0.238497	13.9501	3.14027e-44	1.22575e-42
ENSG00000006576	2597.15	-1.0436	0.0748266	-13.9469	3.28461e-44	1.28032e-42
ENSG00000253741	82.5089	2.69498	0.193278	13.9436	3.44168e-44	1.33969e-42
ENSG00000100092	549.968	1.08025	0.077478	13.9426	3.48906e-44	1.35626e-42
ENSG00000152558	6572.04	-1.06064	0.0761495	-13.9283	4.26205e-44	1.65446e-42
ENSG00000085224	1706.31	-1.08523	0.0779364	-13.9245	4.49538e-44	1.74264e-42
ENSG00000112972	3123.05	-0.907486	0.0651833	-13.9221	4.65322e-44	1.80135e-42
ENSG00000166685	2276.82	0.770984	0.0554318	13.9087	5.61032e-44	2.16889e-42
ENSG00000184012	2503.48	-0.87869	0.0631994	-13.9035	6.03454e-44	2.3297e-42
ENSG00000153531	741.194	0.983187	0.070775	13.8917	7.11012e-44	2.74119e-42
ENSG00000115129	6897.94	0.775476	0.0558262	13.8909	7.19275e-44	2.76926e-42
ENSG00000163435	4580.64	-1.1033	0.079555	-13.8684	9.83819e-44	3.77756e-42
ENSG00000107099	261.743	-1.66581	0.120115	-13.8684	9.83844e-44	3.77756e-42
ENSG00000174695	3436.1	-1.29433	0.0933466	-13.8658	1.02014e-43	3.91162e-42
ENSG00000259881	484.862	2.01199	0.14512	13.8644	1.04165e-43	3.98865e-42
ENSG00000145623	2307.26	-0.806131	0.0581785	-13.8562	1.16744e-43	4.46428e-42
ENSG00000145198	882.163	1.1553	0.083401	13.8524	1.2309e-43	4.70059e-42
ENSG00000153832	169.232	-1.98697	0.143537	-13.8429	1.40437e-43	5.35576e-42
ENSG00000167994	163.784	2.50282	0.180947	13.8318	1.63915e-43	6.24271e-42
ENSG00000071991	80.1396	-3.64253	0.26339	-13.8294	1.69412e-43	6.44336e-42
ENSG00000170421	212201	-1.09474	0.07921	-13.8207	1.91135e-43	7.25978e-42
ENSG00000137310	3512.15	-0.771696	0.0558394	-13.8199	1.93239e-43	7.32982e-42
ENSG00000159658	4170.23	-0.696102	0.0504108	-13.8086	2.26194e-43	8.56835e-42
ENSG00000198919	1151.73	-1.0932	0.0791687	-13.8085	2.26648e-43	8.57404e-42
ENSG00000077782	1027.27	-1.11459	0.0807399	-13.8047	2.38635e-43	9.01542e-42
ENSG00000160293	1214.2	0.818299	0.0593431	13.7893	2.95683e-43	1.11557e-41
ENSG00000228507	72.7485	5.34695	0.387955	13.7824	3.25178e-43	1.22521e-41
ENSG00000141497	378.206	-1.41996	0.10312	-13.77	3.86156e-43	1.45303e-41
ENSG00000197937	637.312	-1.1809	0.0857803	-13.7665	4.05117e-43	1.52234e-41
ENSG00000119227	283.061	-1.81303	0.131774	-13.7586	4.52147e-43	1.69681e-41
ENSG00000184557	85.259	2.69406	0.195813	13.7583	4.53772e-43	1.70065e-41
ENSG00000099812	1571.86	1.17135	0.0852324	13.7431	5.60581e-43	2.09816e-41
ENSG00000085719	6072.45	-0.778194	0.0566306	-13.7416	5.72183e-43	2.13875e-41
ENSG00000157181	2141.04	-1.04921	0.0764347	-13.7269	7.00475e-43	2.61483e-41
ENSG00000182628	1886.61	-1.13937	0.0830105	-13.7256	7.13196e-43	2.6588e-41
ENSG00000211891	79.7585	2.78761	0.203184	13.7196	7.74866e-43	2.8849e-41
ENSG00000143457	1216.88	-0.947025	0.0690386	-13.7173	7.9956e-43	2.97291e-41
ENSG00000205269	519.392	-1.96597	0.14333	-13.7164	8.09799e-43	3.00702e-41
ENSG00000151233	2176.39	-1.13352	0.082641	-13.7162	8.11933e-43	3.01098e-41
ENSG00000122376	1365.83	-1.15093	0.0839179	-13.715	8.25787e-43	3.05834e-41
ENSG00000206195	412.135	-1.28402	0.0936619	-13.7091	8.95402e-43	3.31181e-41
ENSG00000227203	118.857	6.98908	0.510016	13.7037	9.65355e-43	3.56588e-41
ENSG00000182324	216.246	1.81609	0.132627	13.6932	1.11436e-42	4.11088e-41
ENSG00000137801	4313.08	0.772973	0.056461	13.6904	1.15865e-42	4.26871e-41
ENSG00000165891	979.118	-1.18906	0.0868624	-13.689	1.18161e-42	4.34761e-41
ENSG00000132386	422.99	-1.35971	0.0993856	-13.6812	1.31548e-42	4.83389e-41
ENSG00000049245	2373.89	-0.833572	0.0609362	-13.6794	1.34764e-42	4.94561e-41
ENSG00000111728	190.943	1.58951	0.116324	13.6644	1.65623e-42	6.0702e-41
ENSG00000140416	10984.7	-1.45315	0.106367	-13.6616	1.72053e-42	6.29768e-41
ENSG00000175115	2995.73	-0.900841	0.0659765	-13.654	1.91145e-42	6.98743e-41
ENSG00000140950	942.002	-0.884176	0.0647639	-13.6523	1.9564e-42	7.14252e-41
ENSG00000136010	694.596	1.07494	0.07875	13.6501	2.01653e-42	7.35252e-41
ENSG00000004478	21103	1.25818	0.0921811	13.649	2.04586e-42	7.44985e-41
ENSG00000101856	1593.33	-0.786255	0.057621	-13.6453	2.15369e-42	7.83237e-41
ENSG00000197757	859.668	1.01922	0.0747098	13.6424	2.23922e-42	8.13294e-41
ENSG00000178202	3270.75	-0.699896	0.0513071	-13.6413	2.27411e-42	8.24904e-41
ENSG00000153558	395.466	-1.30091	0.095367	-13.6411	2.28052e-42	8.26169e-41
ENSG00000110318	555.935	-1.20077	0.0880295	-13.6406	2.29691e-42	8.31038e-41
ENSG00000110492	2898.83	1.81401	0.133012	13.6379	2.38167e-42	8.60604e-41
ENSG00000173762	60.5845	4.49975	0.329946	13.6379	2.38483e-42	8.60644e-41
ENSG00000196220	1266.44	0.905968	0.0665025	13.6231	2.92033e-42	1.05255e-40
ENSG00000149573	1343.5	-1.19263	0.0875727	-13.6188	3.0972e-42	1.11487e-40
ENSG00000124160	2677.92	0.663277	0.0487062	13.6179	3.13383e-42	1.12662e-40
ENSG00000197405	103.86	2.5008	0.18389	13.5994	4.03626e-42	1.4492e-40
ENSG00000165685	295.598	-1.42406	0.104718	-13.599	4.05836e-42	1.45528e-40
ENSG00000151366	583.739	-2.28679	0.168183	-13.597	4.17129e-42	1.49388e-40
ENSG00000117298	3821.22	0.827428	0.0608661	13.5942	4.33253e-42	1.54966e-40
ENSG00000273203	81.7005	-3.2555	0.239495	-13.5932	4.39582e-42	1.57031e-40
ENSG00000184083	957.988	-1.51022	0.11118	-13.5836	5.00749e-42	1.78655e-40
ENSG00000204396	104.404	2.4121	0.177599	13.5817	5.13907e-42	1.83118e-40
ENSG00000143341	159.123	1.81592	0.133772	13.5747	5.65471e-42	2.01238e-40
ENSG00000236548	79.1484	-3.96747	0.292277	-13.5743	5.68461e-42	2.02047e-40
ENSG00000174640	163.323	-2.16579	0.159628	-13.5677	6.22047e-42	2.20815e-40
ENSG00000170745	1024.92	1.04235	0.076949	13.546	8.36368e-42	2.96522e-40
ENSG00000197299	522.426	-1.30723	0.0965219	-13.5433	8.67656e-42	3.07228e-40
ENSG00000133138	251.605	-1.50006	0.110773	-13.5417	8.87618e-42	3.13903e-40
ENSG00000140534	1894.03	-0.780886	0.0576816	-13.5379	9.34684e-42	3.30134e-40
ENSG00000116584	4527.6	0.629234	0.0464854	13.5362	9.56325e-42	3.37356e-40
ENSG00000105388	65.3177	3.28779	0.242972	13.5316	1.0178e-41	3.58592e-40
ENSG00000174177	1261.66	1.22256	0.0903506	13.5313	1.02261e-41	3.59837e-40
ENSG00000255014	139.043	7.58023	0.560309	13.5287	1.05913e-41	3.72225e-40
ENSG00000143036	235.404	-1.62402	0.12009	-13.5233	1.13889e-41	3.9976e-40
ENSG00000115648	15621.8	0.696737	0.0515418	13.5179	1.22633e-41	4.29916e-40
ENSG00000136717	142.535	1.89622	0.140305	13.515	1.27624e-41	4.4686e-40
ENSG00000138162	2339.36	0.808914	0.0598598	13.5135	1.30245e-41	4.55472e-40
ENSG00000142856	412.81	-1.24587	0.0922363	-13.5074	1.41388e-41	4.93826e-40
ENSG00000068079	1025.86	0.950463	0.0703993	13.501	1.54222e-41	5.37986e-40
ENSG00000230091	192.459	-1.80525	0.13376	-13.4961	1.64782e-41	5.74114e-40
ENSG00000125531	62.4212	3.6863	0.273178	13.4941	1.69386e-41	5.89425e-40
ENSG00000141668	7550.96	0.792932	0.0587733	13.4914	1.75833e-41	6.11108e-40
ENSG00000122912	1934.63	-1.31221	0.0972679	-13.4907	1.77412e-41	6.15836e-40
ENSG00000121966	301.06	1.24602	0.09238	13.488	1.84118e-41	6.38329e-40
ENSG00000141756	1900.2	0.78164	0.0579867	13.4797	2.06074e-41	7.13572e-40
ENSG00000188177	307.078	-1.84918	0.137204	-13.4776	2.1185e-41	7.32675e-40
ENSG00000116237	3602.71	-0.855607	0.0634963	-13.4749	2.19795e-41	7.59221e-40
ENSG00000144036	787.08	-1.04618	0.0777028	-13.4638	2.55375e-41	8.81045e-40
ENSG00000009413	1467.49	-0.916962	0.0681195	-13.4611	2.6498e-41	9.13065e-40
ENSG00000260916	511.794	-1.24079	0.0922121	-13.4558	2.84582e-41	9.79414e-40
ENSG00000001461	4028.42	-0.689461	0.0512411	-13.4552	2.86859e-41	9.86049e-40
ENSG00000059769	612.333	1.32306	0.098431	13.4415	3.4545e-41	1.186e-39
ENSG00000047932	737.976	-1.1194	0.0833208	-13.4348	3.78054e-41	1.29636e-39
ENSG00000179148	314.254	1.34633	0.100253	13.4294	4.06801e-41	1.39325e-39
ENSG00000140961	1728.97	1.11373	0.0829455	13.4273	4.18671e-41	1.43216e-39
ENSG00000164096	2046.41	-1.15597	0.0860979	-13.4263	4.24219e-41	1.44938e-39
ENSG00000113758	2567.21	0.968573	0.0721797	13.4189	4.68521e-41	1.59881e-39
ENSG00000151229	188.211	-2.00772	0.149729	-13.409	5.35457e-41	1.82502e-39
ENSG00000070413	2439.29	-1.10076	0.0821992	-13.3914	6.7925e-41	2.31232e-39
ENSG00000126005	1553.61	-1.54623	0.115533	-13.3835	7.55448e-41	2.56861e-39
ENSG00000187951	934.317	-0.950903	0.071052	-13.3832	7.58135e-41	2.57465e-39
ENSG00000092421	755.092	1.49282	0.111736	13.3602	1.03263e-40	3.50264e-39
ENSG00000105376	282.107	1.84458	0.138079	13.3589	1.05159e-40	3.56267e-39
ENSG00000260793	309.96	-1.45386	0.108922	-13.3477	1.22177e-40	4.13425e-39
ENSG00000085377	1234.91	-0.964922	0.0723054	-13.3451	1.26527e-40	4.27633e-39
ENSG00000153395	6308.57	-0.939905	0.0704637	-13.3389	1.37551e-40	4.64333e-39
ENSG00000114279	100.493	-3.15254	0.236371	-13.3372	1.40589e-40	4.74023e-39
ENSG00000049167	366.816	-1.31707	0.098772	-13.3344	1.46009e-40	4.9171e-39
ENSG00000116852	93.0218	2.51956	0.189106	13.3235	1.68931e-40	5.68225e-39
ENSG00000049323	4748.07	-0.833391	0.0625556	-13.3224	1.71497e-40	5.7617e-39
ENSG00000162415	113.801	-2.27225	0.17068	-13.313	1.94581e-40	6.52944e-39
ENSG00000204385	90.9482	2.60472	0.195675	13.3115	1.98568e-40	6.65534e-39
ENSG00000102362	430.269	1.15193	0.0865473	13.3098	2.03027e-40	6.79672e-39
ENSG00000170271	162.408	1.82169	0.136938	13.3031	2.2217e-40	7.42876e-39
ENSG00000166886	1366.27	0.903453	0.0679295	13.2999	2.31902e-40	7.74499e-39
ENSG00000105983	1266.7	-1.0481	0.0788129	-13.2985	2.36054e-40	7.87432e-39
ENSG00000140525	4324.56	-1.1077	0.0832983	-13.298	2.37737e-40	7.92111e-39
ENSG00000136052	784.331	-1.05265	0.0791675	-13.2964	2.42807e-40	8.08048e-39
ENSG00000073536	1287.87	0.96323	0.0724446	13.2961	2.43891e-40	8.10702e-39
ENSG00000256464	70.1706	5.67919	0.427328	13.29	2.64566e-40	8.78389e-39
ENSG00000074964	1144.72	1.09735	0.0825775	13.2887	2.691e-40	8.92394e-39
ENSG00000160932	6386.68	1.12322	0.0845315	13.2876	2.73144e-40	9.04742e-39
ENSG00000090447	263.678	1.34597	0.101328	13.2832	2.89568e-40	9.58018e-39
ENSG00000069869	1403.92	-0.731378	0.0550639	-13.2823	2.93082e-40	9.6851e-39
ENSG00000120963	2056.56	-0.941504	0.0709165	-13.2762	3.17995e-40	1.04961e-38
ENSG00000113161	3709.31	-0.850863	0.0641537	-13.2629	3.79966e-40	1.25269e-38
ENSG00000232593	848.136	-1.22563	0.0924299	-13.2601	3.94618e-40	1.29948e-38
ENSG00000114054	2509.38	0.774398	0.0584324	13.2529	4.34128e-40	1.42792e-38
ENSG00000188211	499.692	1.19053	0.0898642	13.2481	4.62847e-40	1.52061e-38
ENSG00000092964	650.628	-0.987263	0.0747233	-13.2122	7.45679e-40	2.44695e-38
ENSG00000182054	11377.6	-0.73888	0.0559295	-13.2109	7.5895e-40	2.48761e-38
ENSG00000135211	457.862	-1.14175	0.0864279	-13.2105	7.63588e-40	2.49991e-38
ENSG00000139910	93.212	2.91388	0.220632	13.207	7.99613e-40	2.61482e-38
ENSG00000169891	790.347	-1.18471	0.0897149	-13.2053	8.17744e-40	2.66792e-38
ENSG00000175061	2976.58	0.707948	0.0536106	13.2054	8.16972e-40	2.66792e-38
ENSG00000105641	67.0682	3.46769	0.262765	13.1969	9.1385e-40	2.97803e-38
ENSG00000162607	1707.51	-1.11493	0.0845167	-13.1918	9.78247e-40	3.18421e-38
ENSG00000198947	248.705	1.63263	0.123769	13.1909	9.90198e-40	3.2194e-38
ENSG00000196268	676.329	-1.62059	0.122875	-13.189	1.0155e-39	3.29787e-38
ENSG00000269516	88.8194	2.49719	0.189449	13.1814	1.12332e-39	3.64382e-38
ENSG00000225138	579.939	-1.49339	0.113302	-13.1806	1.13557e-39	3.67932e-38
ENSG00000137699	341.957	-1.80322	0.136816	-13.1799	1.14551e-39	3.70727e-38
ENSG00000172602	423.937	1.25573	0.0953939	13.1637	1.42037e-39	4.59156e-38
ENSG00000179918	5163.28	0.745155	0.0566347	13.1572	1.54665e-39	4.99404e-38
ENSG00000161642	7596.1	1.40606	0.106945	13.1476	1.75771e-39	5.66907e-38
ENSG00000103489	329.557	-1.87211	0.142402	-13.1467	1.77804e-39	5.7281e-38
ENSG00000168907	1272.51	0.781301	0.0594692	13.1379	1.99624e-39	6.4237e-38
ENSG00000153246	522.387	-1.1709	0.0891467	-13.1345	2.08803e-39	6.71144e-38
ENSG00000160285	5834.89	-1.17831	0.0897412	-13.1301	2.21387e-39	7.1078e-38
ENSG00000204217	1826.7	-1.48208	0.112942	-13.1225	2.44685e-39	7.84687e-38
ENSG00000092621	3163.89	0.883413	0.0673688	13.1131	2.77074e-39	8.87549e-38
ENSG00000159674	118.706	2.16298	0.164962	13.112	2.81021e-39	8.99171e-38
ENSG00000181218	501.669	1.45123	0.110704	13.1091	2.92085e-39	9.33516e-38
ENSG00000149591	1738.75	1.60228	0.122283	13.103	3.16324e-39	1.00984e-37
ENSG00000158290	2846.69	-1.07179	0.081828	-13.0981	3.37774e-39	1.0771e-37
ENSG00000171208	94.4039	-2.66912	0.203918	-13.0892	3.79681e-39	1.20937e-37
ENSG00000272462	254.477	1.51692	0.115948	13.0828	4.13009e-39	1.31404e-37
ENSG00000076716	130.713	-1.95616	0.14956	-13.0795	4.31347e-39	1.37084e-37
ENSG00000228716	2445.13	-1.00249	0.0766967	-13.0708	4.83244e-39	1.53404e-37
ENSG00000154654	6358.65	-1.1151	0.0853368	-13.0671	5.07673e-39	1.60978e-37
ENSG00000133316	1402.61	0.989326	0.0757422	13.0618	5.44515e-39	1.72466e-37
ENSG00000169962	186.871	2.08443	0.159649	13.0563	5.84734e-39	1.84997e-37
ENSG00000116032	85.8693	2.51035	0.192442	13.0447	6.81314e-39	2.15312e-37
ENSG00000129993	2449.73	0.799716	0.0613295	13.0397	7.27721e-39	2.2972e-37
ENSG00000116133	47820.2	-0.718548	0.0551473	-13.0296	8.30225e-39	2.61785e-37
ENSG00000168938	1153.58	-0.954424	0.0732717	-13.0258	8.72516e-39	2.74813e-37
ENSG00000135052	3643.51	0.970647	0.0745248	13.0245	8.88017e-39	2.79384e-37
ENSG00000184560	56.6962	4.72963	0.363266	13.0198	9.4475e-39	2.96902e-37
ENSG00000165521	95.3358	-2.47253	0.189923	-13.0186	9.58798e-39	3.00981e-37
ENSG00000101333	1727.09	-0.773031	0.0594066	-13.0125	1.0383e-38	3.25575e-37
ENSG00000228412	186.054	-1.86927	0.143659	-13.0119	1.0476e-38	3.28127e-37
ENSG00000168916	1142.45	0.903039	0.0694705	12.9989	1.24128e-38	3.88362e-37
ENSG00000028277	71.9129	3.09328	0.238157	12.9884	1.42382e-38	4.44979e-37
ENSG00000144306	540.081	-1.09702	0.0844765	-12.9861	1.4677e-38	4.58187e-37
ENSG00000102893	2147.17	-0.925142	0.0712878	-12.9776	1.64015e-38	5.11456e-37
ENSG00000088035	559.496	-1.17538	0.0906101	-12.9718	1.76839e-38	5.50835e-37
ENSG00000112697	4309.06	-1.28368	0.098983	-12.9687	1.84099e-38	5.72818e-37
ENSG00000143614	2275.24	-0.829157	0.0640322	-12.9491	2.3782e-38	7.38445e-37
ENSG00000100505	175.534	-1.74188	0.134518	-12.9491	2.37853e-38	7.38445e-37
ENSG00000101442	729.054	0.8805	0.0680035	12.9479	2.41573e-38	7.49168e-37
ENSG00000271525	180.799	8.45161	0.65303	12.9422	2.6023e-38	8.06143e-37
ENSG00000119535	61.6224	3.72452	0.287802	12.9412	2.63324e-38	8.14833e-37
ENSG00000122483	246.432	-1.50699	0.116461	-12.9398	2.68189e-38	8.28978e-37
ENSG00000130363	524.711	-0.980059	0.0758303	-12.9244	3.27972e-38	1.01266e-36
ENSG00000186814	513.914	-1.03688	0.0802474	-12.9211	3.42291e-38	1.05572e-36
ENSG00000169180	5425.12	0.633595	0.0490459	12.9184	3.54382e-38	1.09181e-36
ENSG00000134897	493.275	-1.23383	0.095549	-12.9131	3.79774e-38	1.16877e-36
ENSG00000168300	1022.28	-1.33899	0.103716	-12.9101	3.94593e-38	1.21305e-36
ENSG00000058085	265.756	-1.47732	0.114454	-12.9076	4.07975e-38	1.25283e-36
ENSG00000134375	2065.63	-0.676105	0.0524111	-12.9	4.49896e-38	1.38006e-36
ENSG00000162819	2749.23	-1.00247	0.0777652	-12.891	5.05613e-38	1.54928e-36
ENSG00000166012	3798.55	0.933837	0.0724751	12.8849	5.47231e-38	1.67499e-36
ENSG00000139644	49500.3	-0.831662	0.0645852	-12.877	6.06601e-38	1.8547e-36
ENSG00000118855	2320.8	-0.828878	0.0643939	-12.872	6.47003e-38	1.97609e-36
ENSG00000215440	570.699	-1.17036	0.0909651	-12.866	6.99395e-38	2.1338e-36
ENSG00000177697	4753.69	-0.836858	0.0650818	-12.8586	7.7006e-38	2.34685e-36
ENSG00000150967	1227.49	1.11388	0.086627	12.8583	7.72451e-38	2.3516e-36
ENSG00000071082	9372.99	0.929941	0.0723611	12.8514	8.44738e-38	2.5689e-36
ENSG00000206417	126.958	1.86404	0.145059	12.8502	8.57919e-38	2.60617e-36
ENSG00000131171	808.448	-1.29218	0.100613	-12.8431	9.4088e-38	2.85512e-36
ENSG00000157064	186.298	-1.81138	0.141068	-12.8405	9.72922e-38	2.94918e-36
ENSG00000076351	305.186	1.21243	0.0944706	12.8339	1.05889e-37	3.20631e-36
ENSG00000155085	194.842	-1.94014	0.151176	-12.8336	1.06254e-37	3.21394e-36
ENSG00000117318	1593.26	-1.11656	0.0870148	-12.8319	1.08703e-37	3.28449e-36
ENSG00000143384	8175.35	-0.556913	0.0434059	-12.8304	1.10861e-37	3.34612e-36
ENSG00000171016	165.396	-2.15583	0.168033	-12.8298	1.11649e-37	3.36628e-36
ENSG00000171747	127.019	2.07493	0.161769	12.8265	1.1653e-37	3.50971e-36
ENSG00000139915	115.782	-2.28868	0.178465	-12.8242	1.19942e-37	3.60861e-36
ENSG00000157514	1213.2	-0.81626	0.0636508	-12.824	1.20283e-37	3.61503e-36
ENSG00000159399	1546.86	0.859373	0.0670541	12.8161	1.33198e-37	3.99891e-36
ENSG00000066468	3025.12	-0.624931	0.0487669	-12.8147	1.35744e-37	4.07101e-36
ENSG00000126773	2548.05	-0.856345	0.0668498	-12.81	1.44133e-37	4.31803e-36
ENSG00000080200	1544.03	-0.904994	0.0706595	-12.8078	1.48263e-37	4.43705e-36
ENSG00000158467	617.317	-1.02569	0.0801074	-12.804	1.55726e-37	4.65544e-36
ENSG00000167588	552.938	1.0029	0.0783471	12.8007	1.62533e-37	4.85379e-36
ENSG00000250539	201.668	1.54621	0.120823	12.7973	1.69786e-37	5.06505e-36
ENSG00000125629	471.981	-1.22711	0.0959152	-12.7937	1.77876e-37	5.30077e-36
ENSG00000143476	2553.5	-0.778807	0.0608802	-12.7924	1.80709e-37	5.37953e-36
ENSG00000163083	5223.46	-0.746436	0.0583595	-12.7903	1.85717e-37	5.52279e-36
ENSG00000180730	343.566	-1.92382	0.150457	-12.7865	1.95091e-37	5.79543e-36
ENSG00000136021	5524.52	-0.743135	0.0581444	-12.7809	2.09733e-37	6.22384e-36
ENSG00000008735	269.388	1.64451	0.128694	12.7784	2.16364e-37	6.41386e-36
ENSG00000124343	899.386	-1.19663	0.0936646	-12.7757	2.24091e-37	6.63595e-36
ENSG00000125871	1997.35	-0.935318	0.0732163	-12.7747	2.2695e-37	6.71359e-36
ENSG00000198208	825.815	0.883086	0.0691308	12.7741	2.2868e-37	6.75768e-36
ENSG00000172818	236.267	1.76909	0.138556	12.7681	2.47197e-37	7.29722e-36
ENSG00000064651	763.024	-1.21512	0.0953045	-12.7499	3.12248e-37	9.2079e-36
ENSG00000103540	1910.15	-0.817955	0.0641733	-12.746	3.28021e-37	9.66293e-36
ENSG00000168062	169.299	1.69246	0.132809	12.7436	3.38455e-37	9.95989e-36
ENSG00000167100	63.3002	3.05029	0.239456	12.7384	3.61586e-37	1.06295e-35
ENSG00000186907	236.885	1.84638	0.144987	12.7348	3.78674e-37	1.11202e-35
ENSG00000163898	716.096	-1.0723	0.0842035	-12.7347	3.7949e-37	1.11326e-35
ENSG00000012660	5641.89	-0.664785	0.0522246	-12.7293	4.06307e-37	1.19069e-35
ENSG00000113494	60663.6	-0.981804	0.0771596	-12.7243	4.33189e-37	1.26816e-35
ENSG00000175920	224.993	2.14061	0.168243	12.7233	4.38644e-37	1.28279e-35
ENSG00000170270	242.014	-1.81764	0.142901	-12.7196	4.60417e-37	1.34508e-35
ENSG00000133135	80.5722	-3.0046	0.236265	-12.7171	4.75443e-37	1.38754e-35
ENSG00000117519	7980.36	-0.969529	0.0762461	-12.7158	4.83196e-37	1.40871e-35
ENSG00000248971	64.2487	2.97641	0.234199	12.7089	5.27631e-37	1.53666e-35
ENSG00000123136	3404.91	0.697715	0.0549301	12.7019	5.7741e-37	1.6799e-35
ENSG00000183067	107.292	2.01873	0.159026	12.6943	6.35808e-37	1.8479e-35
ENSG00000125107	8915.4	-0.708901	0.0558738	-12.6875	6.93247e-37	2.01277e-35
ENSG00000180573	776.496	-1.02267	0.0806131	-12.6861	7.05806e-37	2.04713e-35
ENSG00000204516	2408.53	0.722394	0.0569844	12.6771	7.92564e-37	2.2964e-35
ENSG00000156453	4642.35	0.907202	0.0715677	12.6761	8.01761e-37	2.32067e-35
ENSG00000048052	93.9961	-2.51695	0.198595	-12.6738	8.2646e-37	2.38971e-35
ENSG00000153551	358.306	1.36107	0.107402	12.6727	8.38208e-37	2.42119e-35
ENSG00000154217	340.807	-1.65088	0.130355	-12.6645	9.30117e-37	2.68393e-35
ENSG00000090339	245.996	1.73353	0.136883	12.6643	9.32189e-37	2.68716e-35
ENSG00000166402	406.242	-1.43944	0.113681	-12.6621	9.59333e-37	2.76259e-35
ENSG00000064199	199.124	-1.9266	0.152264	-12.6531	1.07571e-36	3.09455e-35
ENSG00000228486	200.77	-1.84145	0.145829	-12.6274	1.49068e-36	4.28397e-35
ENSG00000160208	2505.6	0.74132	0.0588095	12.6054	1.97084e-36	5.65809e-35
ENSG00000095059	1832.04	0.701356	0.0556487	12.6033	2.02533e-36	5.80862e-35
ENSG00000187240	1577.48	-1.00291	0.0795925	-12.6006	2.09587e-36	6.00483e-35
ENSG00000183255	8695.98	-0.600491	0.0476645	-12.5983	2.15778e-36	6.17593e-35
ENSG00000107819	2306.18	0.613044	0.0487096	12.5857	2.5308e-36	7.23624e-35
ENSG00000143622	1421.5	-0.818294	0.0650197	-12.5853	2.54288e-36	7.26341e-35
ENSG00000105227	432.511	1.27659	0.101456	12.5827	2.63007e-36	7.50486e-35
ENSG00000215114	1749.78	-0.872536	0.0695376	-12.5477	4.09301e-36	1.16676e-34
ENSG00000228118	450.101	10.5084	0.837488	12.5475	4.10082e-36	1.1678e-34
ENSG00000124406	933.918	-1.49185	0.118923	-12.5447	4.25236e-36	1.20974e-34
ENSG00000115325	193.521	1.68375	0.134419	12.5261	5.37104e-36	1.52645e-34
ENSG00000164576	1358.72	-0.749311	0.0598237	-12.5253	5.42718e-36	1.54085e-34
ENSG00000152582	943.789	-1.07155	0.0855776	-12.5214	5.70017e-36	1.61673e-34
ENSG00000114670	189.517	-2.01982	0.161356	-12.5178	5.96421e-36	1.68992e-34
ENSG00000114529	689.54	0.956064	0.0763769	12.5177	5.97364e-36	1.69089e-34
ENSG00000114473	1268.41	-1.10144	0.0880238	-12.5129	6.3429e-36	1.79362e-34
ENSG00000269343	727.279	1.25998	0.100762	12.5044	7.0601e-36	1.99442e-34
ENSG00000147676	4626.02	-1.00585	0.0805861	-12.4817	9.39136e-36	2.65033e-34
ENSG00000240376	59.2555	3.23243	0.258985	12.4812	9.46043e-36	2.66716e-34
ENSG00000184500	67.5514	-3.49667	0.280175	-12.4803	9.56109e-36	2.69285e-34
ENSG00000139514	3147.79	0.773783	0.06206	12.4683	1.1118e-35	3.12823e-34
ENSG00000006282	3768.7	0.951485	0.076329	12.4656	1.15023e-35	3.23314e-34
ENSG00000185808	442.396	-1.11924	0.0899073	-12.4488	1.41946e-35	3.98592e-34
ENSG00000161905	228.918	1.3588	0.10916	12.4478	1.43799e-35	4.03396e-34
ENSG00000072195	511.929	1.14695	0.0921957	12.4403	1.57827e-35	4.42307e-34
ENSG00000067992	635.966	1.01422	0.0815967	12.4296	1.80496e-35	5.05336e-34
ENSG00000087253	104.625	-2.46611	0.198416	-12.429	1.81856e-35	5.08638e-34
ENSG00000104980	1317.27	0.927512	0.0746753	12.4206	2.02043e-35	5.6454e-34
ENSG00000077044	1156.97	0.784604	0.0632017	12.4143	2.18667e-35	6.10385e-34
ENSG00000104899	1860.22	1.25757	0.101435	12.3977	2.68778e-35	7.49525e-34
ENSG00000170689	58.3902	3.06098	0.246997	12.3928	2.86054e-35	7.96913e-34
ENSG00000130598	692.007	1.35113	0.109089	12.3856	3.12753e-35	8.70435e-34
ENSG00000117335	15290	-1.03331	0.0834451	-12.3831	3.22729e-35	8.97313e-34
ENSG00000164114	739.435	-1.27184	0.102723	-12.3812	3.30426e-35	9.17811e-34
ENSG00000160961	824.074	1.36327	0.110225	12.3681	3.89102e-35	1.07973e-33
ENSG00000153993	73.6682	-2.88628	0.233443	-12.364	4.0938e-35	1.13488e-33
ENSG00000235162	263.724	-1.61308	0.130533	-12.3576	4.4306e-35	1.22705e-33
ENSG00000260942	398.581	1.23859	0.100232	12.3572	4.45155e-35	1.23163e-33
ENSG00000023041	921.615	-0.817051	0.0661196	-12.3572	4.45588e-35	1.23163e-33
ENSG00000115738	815.014	-1.18858	0.0962123	-12.3538	4.64793e-35	1.28346e-33
ENSG00000132746	3702.02	0.879061	0.0711841	12.3491	4.92416e-35	1.3584e-33
ENSG00000118873	3095.89	-0.593065	0.0480333	-12.347	5.05828e-35	1.39404e-33
ENSG00000169684	377.913	-1.3304	0.107774	-12.3443	5.2255e-35	1.43872e-33
ENSG00000129951	148.114	2.06275	0.167168	12.3394	5.55703e-35	1.52851e-33
ENSG00000005893	3082.96	-0.869751	0.0704953	-12.3377	5.6742e-35	1.55922e-33
ENSG00000071553	11109.3	0.677353	0.0549019	12.3375	5.68925e-35	1.56183e-33
ENSG00000103269	680.051	1.48704	0.120578	12.3326	6.04957e-35	1.65914e-33
ENSG00000128228	826.817	0.971228	0.0788109	12.3235	6.76724e-35	1.85416e-33
ENSG00000125868	20866.2	-1.03318	0.0839057	-12.3136	7.65093e-35	2.09425e-33
ENSG00000047365	1139.83	-0.87663	0.0711951	-12.3131	7.70409e-35	2.10676e-33
ENSG00000118094	53.7226	3.62941	0.294887	12.3078	8.22583e-35	2.24725e-33
ENSG00000258469	48.1131	3.8186	0.310424	12.3012	8.92016e-35	2.43458e-33
ENSG00000156052	1412.8	-0.729185	0.0592846	-12.2997	9.08642e-35	2.47756e-33
ENSG00000109332	4973.53	-0.658018	0.0535068	-12.2978	9.30263e-35	2.53407e-33
ENSG00000114405	439.863	-1.66727	0.135595	-12.296	9.51334e-35	2.58897e-33
ENSG00000116990	292.682	1.26227	0.102676	12.2937	9.79125e-35	2.66203e-33
ENSG00000104047	465.044	-1.15204	0.0938606	-12.274	1.24934e-34	3.39342e-33
ENSG00000176623	1974.26	-0.843114	0.0687054	-12.2714	1.28951e-34	3.49916e-33
ENSG00000259129	100.185	-2.6834	0.218776	-12.2655	1.38688e-34	3.75975e-33
ENSG00000158623	1099.67	-0.935372	0.076263	-12.2651	1.39478e-34	3.77756e-33
ENSG00000085063	7227.58	-0.650434	0.0530379	-12.2636	1.42103e-34	3.84496e-33
ENSG00000104881	5758.66	-0.780242	0.063668	-12.2549	1.58218e-34	4.27689e-33
ENSG00000170293	325.165	1.40494	0.114648	12.2544	1.59181e-34	4.29879e-33
ENSG00000162104	2601.41	0.70893	0.0578568	12.2532	1.61536e-34	4.35824e-33
ENSG00000138190	947.804	-0.961124	0.0784798	-12.2468	1.74832e-34	4.71244e-33
ENSG00000019582	555.464	1.28229	0.104712	12.2458	1.76883e-34	4.76319e-33
ENSG00000124302	69.0531	2.9938	0.244529	12.2431	1.82848e-34	4.91913e-33
ENSG00000276691	102.019	1.99436	0.16301	12.2346	2.02982e-34	5.45557e-33
ENSG00000007516	955.832	1.11198	0.0909152	12.2309	2.12472e-34	5.7052e-33
ENSG00000103018	2691.55	-0.644851	0.0527388	-12.2273	2.22323e-34	5.96405e-33
ENSG00000133739	902.319	-1.48626	0.121641	-12.2184	2.47931e-34	6.64469e-33
ENSG00000250133	465.676	1.00259	0.0820787	12.215	2.58426e-34	6.9194e-33
ENSG00000154760	1740.64	-0.937522	0.0767795	-12.2106	2.72942e-34	7.30114e-33
ENSG00000204305	667.871	0.939342	0.0769332	12.2098	2.75426e-34	7.3606e-33
ENSG00000155974	134.678	-1.8909	0.154876	-12.2092	2.7777e-34	7.41622e-33
ENSG00000148339	601.506	1.14376	0.093748	12.2003	3.09592e-34	8.25804e-33
ENSG00000179455	123.374	1.73716	0.142527	12.1883	3.58777e-34	9.56095e-33
ENSG00000101220	615.686	1.45466	0.119386	12.1845	3.75722e-34	1.00031e-32
ENSG00000172915	391.514	-1.2122	0.0994901	-12.1841	3.77657e-34	1.00451e-32
ENSG00000184058	156.179	1.99484	0.163814	12.1775	4.09847e-34	1.0891e-32
ENSG00000113739	31539	0.831107	0.0682652	12.1747	4.24064e-34	1.12582e-32
ENSG00000101000	171.239	1.55813	0.128011	12.1718	4.39157e-34	1.1648e-32
ENSG00000148730	5852.47	-0.57623	0.0473632	-12.1662	4.70519e-34	1.24681e-32
ENSG00000186635	2187.51	0.714665	0.0588251	12.149	5.80905e-34	1.53787e-32
ENSG00000253873	232.62	1.57272	0.129461	12.1482	5.86155e-34	1.55032e-32
ENSG00000058804	3812.02	-0.733915	0.0604291	-12.1451	6.09384e-34	1.61025e-32
ENSG00000130479	1026.75	1.11279	0.0916409	12.143	6.24939e-34	1.6498e-32
ENSG00000196976	869.217	1.04012	0.0856856	12.1388	6.58152e-34	1.73586e-32
ENSG00000169884	180.475	1.44964	0.119485	12.1325	7.10862e-34	1.87313e-32
ENSG00000179348	1477.3	0.934151	0.0769984	12.1321	7.14205e-34	1.88018e-32
ENSG00000275481	151.745	1.76886	0.145827	12.1299	7.33731e-34	1.92979e-32
ENSG00000164414	618.241	-1.28264	0.105747	-12.1293	7.38777e-34	1.94125e-32
ENSG00000234614	105.674	1.86496	0.153786	12.127	7.59954e-34	1.99504e-32
ENSG00000106025	122.093	1.84581	0.152293	12.1201	8.26612e-34	2.16801e-32
ENSG00000144224	4152.58	-0.749133	0.0618284	-12.1163	8.65407e-34	2.26766e-32
ENSG00000156802	8530.83	-0.759207	0.0626802	-12.1124	9.08013e-34	2.37709e-32
ENSG00000100078	107.657	1.98408	0.163885	12.1066	9.74882e-34	2.54978e-32
ENSG00000198911	6272.08	-0.75902	0.0627038	-12.1048	9.95669e-34	2.60174e-32
ENSG00000069275	18250.1	-0.897442	0.0741564	-12.102	1.03064e-33	2.69062e-32
ENSG00000256269	1791.14	0.677588	0.0560173	12.0961	1.10799e-33	2.8899e-32
ENSG00000163527	6381.28	-0.923178	0.07636	-12.0898	1.19558e-33	3.11547e-32
ENSG00000186951	615.901	-0.950737	0.0786433	-12.0892	1.20418e-33	3.13498e-32
ENSG00000198089	1620.77	-1.13531	0.0939612	-12.0828	1.30238e-33	3.38751e-32
ENSG00000179912	1243.48	-1.11402	0.0922121	-12.081	1.33074e-33	3.45809e-32
ENSG00000134830	1084.22	1.02238	0.0846655	12.0756	1.42198e-33	3.69178e-32
ENSG00000101236	775.923	-0.804084	0.0665944	-12.0744	1.44292e-33	3.7427e-32
ENSG00000040341	1358.28	-0.795192	0.065879	-12.0705	1.51231e-33	3.91909e-32
ENSG00000148488	239.665	-1.42896	0.118396	-12.0693	1.53362e-33	3.97066e-32
ENSG00000149090	63.3805	-3.52663	0.292359	-12.0627	1.66293e-33	4.30151e-32
ENSG00000196440	156.213	1.75722	0.145706	12.06	1.7177e-33	4.43911e-32
ENSG00000273464	76.8062	-3.09473	0.256689	-12.0563	1.79598e-33	4.63717e-32
ENSG00000163104	1108.28	-0.955495	0.0792698	-12.0537	1.85431e-33	4.78341e-32
ENSG00000214018	53.8211	3.47615	0.288601	12.0448	2.06486e-33	5.32169e-32
ENSG00000145390	3943.22	-0.754191	0.0626247	-12.043	2.11054e-33	5.43446e-32
ENSG00000175414	62.367	2.83381	0.235312	12.0428	2.11744e-33	5.44725e-32
ENSG00000168575	1503.24	-0.646564	0.0536906	-12.0424	2.12621e-33	5.46482e-32
ENSG00000124226	9281.73	-0.714804	0.0593579	-12.0423	2.12998e-33	5.46954e-32
ENSG00000162650	386.581	1.09975	0.0913532	12.0384	2.23167e-33	5.72546e-32
ENSG00000142002	2067.74	0.777217	0.0646333	12.025	2.62506e-33	6.7286e-32
ENSG00000165516	2135.89	-0.752646	0.0625912	-12.0248	2.63292e-33	6.74261e-32
ENSG00000129673	92.4313	1.9686	0.16372	12.0242	2.65143e-33	6.78387e-32
ENSG00000104756	1019.92	-0.724153	0.0602299	-12.0231	2.68574e-33	6.86542e-32
ENSG00000104549	3458.1	-1.03671	0.0862358	-12.0218	2.72889e-33	6.9694e-32
ENSG00000103253	725.507	1.24554	0.103609	12.0216	2.73735e-33	6.98469e-32
ENSG00000186594	417.979	-1.01692	0.0846033	-12.0198	2.7961e-33	7.12816e-32
ENSG00000248498	157.074	1.77436	0.147632	12.0188	2.82944e-33	7.20665e-32
ENSG00000230316	98.88	1.91141	0.159059	12.017	2.89319e-33	7.36237e-32
ENSG00000168078	951.266	-0.814986	0.0678257	-12.0159	2.93254e-33	7.45577e-32
ENSG00000259581	50.3689	4.00201	0.3331	12.0144	2.98471e-33	7.5816e-32
ENSG00000167693	566.271	-0.991892	0.0825738	-12.0122	3.06653e-33	7.78243e-32
ENSG00000224420	322.596	1.87378	0.156067	12.0062	3.29678e-33	8.35925e-32
ENSG00000074219	1495.95	0.68326	0.0569593	11.9956	3.74773e-33	9.49413e-32
ENSG00000102030	668.202	0.865499	0.072216	11.9849	4.26517e-33	1.07953e-31
ENSG00000139974	236.508	-1.74347	0.145492	-11.9833	4.34771e-33	1.09943e-31
ENSG00000149798	283.18	1.38563	0.115635	11.9828	4.37039e-33	1.10418e-31
ENSG00000167106	6319.79	0.737618	0.0615589	11.9823	4.39891e-33	1.11039e-31
ENSG00000144029	1791.83	1.03749	0.086628	11.9764	4.72366e-33	1.1913e-31
ENSG00000167851	73.4333	6.46132	0.539512	11.9762	4.73426e-33	1.19291e-31
ENSG00000259972	253.827	-1.55517	0.12988	-11.9739	4.8708e-33	1.22622e-31
ENSG00000142875	411.425	-1.35776	0.113411	-11.972	4.97865e-33	1.25225e-31
ENSG00000059573	4304.36	0.551059	0.0460475	11.9672	5.27816e-33	1.3264e-31
ENSG00000260316	49.8016	4.77783	0.399454	11.9609	5.69354e-33	1.42951e-31
ENSG00000249661	49.5379	4.86612	0.406908	11.9588	5.84316e-33	1.46578e-31
ENSG00000175766	105.346	1.8606	0.15562	11.956	6.03676e-33	1.513e-31
ENSG00000258056	331.173	1.15776	0.0968574	11.9532	6.24668e-33	1.56422e-31
ENSG00000121005	548	-1.05647	0.0884067	-11.9501	6.48311e-33	1.62198e-31
ENSG00000077721	2038.49	-0.693337	0.058026	-11.9487	6.59176e-33	1.64771e-31
ENSG00000282511	46.0704	4.5731	0.382951	11.9417	7.17061e-33	1.79081e-31
ENSG00000141627	1094.44	-0.863953	0.072358	-11.94	7.324e-33	1.8275e-31
ENSG00000183856	7263.1	-0.695573	0.0582583	-11.9395	7.36955e-33	1.83724e-31
ENSG00000272335	111.449	-2.54045	0.21285	-11.9354	7.73715e-33	1.92719e-31
ENSG00000143353	534.367	-1.31265	0.10999	-11.9343	7.83826e-33	1.95065e-31
ENSG00000231770	585.9	0.909393	0.0762005	11.9342	7.84997e-33	1.95184e-31
ENSG00000129654	152.804	-1.62836	0.136454	-11.9334	7.93069e-33	1.97018e-31
ENSG00000184731	685.737	-0.883097	0.0740675	-11.9229	8.99534e-33	2.23269e-31
ENSG00000152952	4480.47	-0.819434	0.0687912	-11.9119	1.0262e-32	2.54485e-31
ENSG00000070388	96.6944	1.97921	0.166217	11.9074	1.08358e-32	2.68479e-31
ENSG00000122417	394.842	-1.21432	0.102065	-11.8975	1.21909e-32	3.01788e-31
ENSG00000075426	1169.74	0.695117	0.0584294	11.8967	1.23139e-32	3.04567e-31
ENSG00000172869	1951.17	-1.10314	0.0927438	-11.8945	1.26406e-32	3.12373e-31
ENSG00000197385	305.166	1.23659	0.103967	11.8941	1.26998e-32	3.13562e-31
ENSG00000213614	423.217	0.973006	0.0818088	11.8937	1.27692e-32	3.15e-31
ENSG00000107771	1548.44	-0.690991	0.0581198	-11.8891	1.34875e-32	3.32428e-31
ENSG00000164070	992.002	-0.98168	0.0826145	-11.8827	1.45661e-32	3.587e-31
ENSG00000253797	955.394	-0.858033	0.0722447	-11.8768	1.56312e-32	3.84594e-31
ENSG00000103494	465.583	-1.14165	0.0961497	-11.8736	1.62266e-32	3.98894e-31
ENSG00000106665	430.017	1.28017	0.10782	11.8732	1.63044e-32	4.00458e-31
ENSG00000103415	1744.31	0.932798	0.0786146	11.8655	1.78902e-32	4.39026e-31
ENSG00000121579	5243.37	-0.77185	0.0650619	-11.8633	1.83526e-32	4.49981e-31
ENSG00000143147	349.91	-1.14294	0.0963543	-11.8619	1.86769e-32	4.57536e-31
ENSG00000196296	524.019	1.06907	0.0901405	11.86	1.90961e-32	4.67398e-31
ENSG00000173281	782.037	0.8832	0.0744779	11.8585	1.9432e-32	4.75209e-31
ENSG00000171206	4106.67	1.03377	0.0872339	11.8505	2.13889e-32	5.22612e-31
ENSG00000230069	60.2598	2.81561	0.237611	11.8497	2.1605e-32	5.27435e-31
ENSG00000162994	131.798	-2.16477	0.18269	-11.8494	2.16746e-32	5.28678e-31
ENSG00000168928	49.6382	4.38475	0.370157	11.8456	2.26687e-32	5.52448e-31
ENSG00000151466	232.858	-1.45003	0.122438	-11.843	2.33948e-32	5.69649e-31
ENSG00000117407	511.958	1.08496	0.0916465	11.8385	2.46796e-32	6.00415e-31
ENSG00000242028	548.146	1.07339	0.0906884	11.836	2.54322e-32	6.18192e-31
ENSG00000147883	569.966	-1.0724	0.0906248	-11.8334	2.62177e-32	6.36739e-31
ENSG00000206530	981.175	-1.05882	0.0894973	-11.8308	2.70549e-32	6.56505e-31
ENSG00000172382	450.206	-0.935171	0.07908	-11.8256	2.87711e-32	6.97552e-31
ENSG00000173209	2823.39	-0.807133	0.0682609	-11.8242	2.92529e-32	7.08624e-31
ENSG00000052841	6807.05	-0.901206	0.076218	-11.8241	2.93162e-32	7.09548e-31
ENSG00000105968	4669.33	-0.586863	0.0496388	-11.8227	2.98011e-32	7.20666e-31
ENSG00000113805	118.125	-1.92123	0.162547	-11.8195	3.09413e-32	7.47598e-31
ENSG00000007237	217.069	-1.49129	0.126196	-11.8173	3.17894e-32	7.67433e-31
ENSG00000105643	461.615	0.960155	0.0812721	11.8141	3.30176e-32	7.96402e-31
ENSG00000156103	62.023	-4.09946	0.347171	-11.8082	3.54235e-32	8.53703e-31
ENSG00000006451	2696.29	-0.789889	0.0669169	-11.804	3.71993e-32	8.95735e-31
ENSG00000165863	115.022	1.75013	0.148269	11.8038	3.73187e-32	8.97845e-31
ENSG00000138653	56.476	-3.76567	0.319263	-11.7949	4.14784e-32	9.97071e-31
ENSG00000182220	6620.18	-0.733985	0.0622301	-11.7947	4.15678e-32	9.9837e-31
ENSG00000144320	1191.89	-0.961269	0.0815369	-11.7894	4.4283e-32	1.06268e-30
ENSG00000079308	230.75	1.32524	0.112452	11.785	4.66594e-32	1.11876e-30
ENSG00000161267	3854.05	0.532745	0.0452241	11.7801	4.94302e-32	1.18419e-30
ENSG00000129946	288.377	1.38569	0.11768	11.775	5.25251e-32	1.25726e-30
ENSG00000162923	11777.7	-0.672959	0.0571536	-11.7746	5.27947e-32	1.26264e-30
ENSG00000068885	848.755	-1.27255	0.108079	-11.7743	5.29421e-32	1.2651e-30
ENSG00000113456	1116.5	-0.764317	0.064936	-11.7703	5.55206e-32	1.32559e-30
ENSG00000130164	2222.62	-0.719664	0.0611541	-11.768	5.70379e-32	1.36067e-30
ENSG00000196407	90.1386	2.14303	0.182124	11.7668	5.78489e-32	1.37885e-30
ENSG00000168216	750.689	-1.05553	0.0898348	-11.7497	7.08474e-32	1.68724e-30
ENSG00000175602	454.324	1.41875	0.120758	11.7487	7.1677e-32	1.70556e-30
ENSG00000122952	6038.17	-0.63629	0.0541778	-11.7445	7.53876e-32	1.79235e-30
ENSG00000249346	47.6449	4.9	0.417247	11.7437	7.61239e-32	1.80761e-30
ENSG00000104324	599.542	-1.26013	0.107304	-11.7436	7.61578e-32	1.80761e-30
ENSG00000115457	4897.28	1.11264	0.0947952	11.7374	8.2011e-32	1.9449e-30
ENSG00000205413	393.779	-1.3677	0.116553	-11.7346	8.46771e-32	2.00644e-30
ENSG00000197563	1726.65	-0.950172	0.0809722	-11.7345	8.47878e-32	2.00738e-30
ENSG00000123104	1917.7	-0.741952	0.0632434	-11.7317	8.7692e-32	2.0744e-30
ENSG00000111785	1139.56	-0.864908	0.0738027	-11.7192	1.01629e-31	2.40207e-30
ENSG00000164187	1703.06	-1.30416	0.111316	-11.7158	1.05795e-31	2.49845e-30
ENSG00000120708	249.86	-1.32349	0.112988	-11.7136	1.08571e-31	2.56185e-30
ENSG00000183696	275.825	1.29737	0.110778	11.7114	1.11436e-31	2.62725e-30
ENSG00000279495	316.699	1.63523	0.139635	11.7108	1.12274e-31	2.64481e-30
ENSG00000147689	101.565	1.96671	0.168145	11.6965	1.32804e-31	3.12583e-30
ENSG00000196405	1602.69	0.694	0.0593662	11.6901	1.43145e-31	3.36642e-30
ENSG00000173269	551.876	0.854617	0.0731808	11.6782	1.64827e-31	3.8731e-30
ENSG00000181852	2631.65	0.626302	0.0536351	11.6771	1.66895e-31	3.91842e-30
ENSG00000102158	3301.82	-0.876388	0.0750637	-11.6753	1.70555e-31	4.00103e-30
ENSG00000151892	743.773	1.27805	0.109485	11.6733	1.74522e-31	4.09067e-30
ENSG00000132669	132.762	-1.66581	0.142732	-11.6709	1.79446e-31	4.20261e-30
ENSG00000073921	5072.91	-0.716604	0.061414	-11.6684	1.8481e-31	4.32464e-30
ENSG00000015133	1193.28	0.856287	0.0734012	11.6658	1.90518e-31	4.45453e-30
ENSG00000183742	938.688	-0.86948	0.0745359	-11.6652	1.91859e-31	4.48216e-30
ENSG00000165548	654.116	0.855702	0.073375	11.662	1.99199e-31	4.6498e-30
ENSG00000082996	2305.22	-0.690529	0.0592739	-11.6498	2.30013e-31	5.36462e-30
ENSG00000004766	800.307	-0.971445	0.0834286	-11.644	2.46102e-31	5.73513e-30
ENSG00000047188	1658.97	-0.851802	0.0731835	-11.6393	2.60242e-31	6.05963e-30
ENSG00000121988	185.608	-1.60613	0.138012	-11.6376	2.65378e-31	6.17414e-30
ENSG00000160685	4930.16	0.75319	0.0647528	11.6318	2.84152e-31	6.60547e-30
ENSG00000087470	3240.25	-0.683539	0.058766	-11.6315	2.84879e-31	6.61693e-30
ENSG00000118007	1838.27	-0.801756	0.0689677	-11.6251	3.07284e-31	7.13147e-30
ENSG00000145687	1701.43	-0.72853	0.0626696	-11.6249	3.07867e-31	7.13913e-30
ENSG00000117399	3579.03	0.829955	0.0714132	11.6219	3.19094e-31	7.3934e-30
ENSG00000086062	8855.09	0.685705	0.0590213	11.6179	3.34176e-31	7.73649e-30
ENSG00000162976	752.474	-1.09611	0.0943506	-11.6175	3.35977e-31	7.77182e-30
ENSG00000060749	3180.61	-0.787513	0.0677988	-11.6154	3.44031e-31	7.9516e-30
ENSG00000231691	43.0337	4.47657	0.385448	11.6139	3.50148e-31	8.08635e-30
ENSG00000151116	787.422	-0.869634	0.0749154	-11.6082	3.74352e-31	8.63825e-30
ENSG00000170786	236.361	1.57103	0.135355	11.6068	3.80771e-31	8.77202e-30
ENSG00000131398	4755.53	-0.795888	0.0685711	-11.6068	3.80763e-31	8.77202e-30
ENSG00000110958	14239.8	-0.713	0.0614503	-11.6029	3.98523e-31	9.17349e-30
ENSG00000226180	167.867	1.51986	0.13111	11.5922	4.51176e-31	1.03771e-29
ENSG00000062485	15277.3	0.687615	0.0593278	11.5901	4.62595e-31	1.0631e-29
ENSG00000138182	2231.97	-1.13133	0.0976291	-11.5881	4.73718e-31	1.08778e-29
ENSG00000112419	789.467	-0.844245	0.0728645	-11.5865	4.82419e-31	1.10686e-29
ENSG00000260710	51.2891	2.99355	0.258477	11.5815	5.11295e-31	1.17216e-29
ENSG00000006704	1840.68	0.707736	0.061171	11.5698	5.8628e-31	1.34297e-29
ENSG00000004975	1767.7	-0.780427	0.0674981	-11.5622	6.40388e-31	1.46572e-29
ENSG00000248092	463.987	-1.15732	0.100157	-11.555	6.96339e-31	1.59249e-29
ENSG00000204442	145.051	-1.76684	0.152909	-11.5548	6.97698e-31	1.59431e-29
ENSG00000017260	2968.88	-0.775752	0.0671439	-11.5536	7.08079e-31	1.61542e-29
ENSG00000129003	2642.13	-1.02468	0.0886894	-11.5536	7.07664e-31	1.61542e-29
ENSG00000245573	64.59	-2.7275	0.236135	-11.5506	7.32853e-31	1.67058e-29
ENSG00000188522	1002.28	1.02355	0.0886223	11.5496	7.42065e-31	1.69022e-29
ENSG00000145348	1048.2	-0.891711	0.0772198	-11.5477	7.5815e-31	1.72546e-29
ENSG00000225787	42.0309	4.13257	0.357883	11.5473	7.61959e-31	1.73134e-29
ENSG00000280020	55.3093	2.98756	0.258723	11.5473	7.61738e-31	1.73134e-29
ENSG00000124795	6162.56	-1.00095	0.0867261	-11.5415	8.14802e-31	1.84992e-29
ENSG00000152894	2038.24	-0.68054	0.0589702	-11.5404	8.25402e-31	1.87248e-29
ENSG00000003096	208.954	-1.35281	0.117286	-11.5343	8.86277e-31	2.00897e-29
ENSG00000133422	1885.04	-0.610477	0.0529368	-11.5322	9.08229e-31	2.05707e-29
ENSG00000152402	122.78	-2.17496	0.188652	-11.5289	9.43153e-31	2.13446e-29
ENSG00000140307	1023.36	-1.06862	0.0926925	-11.5286	9.4655e-31	2.14043e-29
ENSG00000141298	1118.41	-0.945287	0.0820066	-11.527	9.64866e-31	2.1801e-29
ENSG00000187796	387.228	1.02727	0.0891251	11.5262	9.73642e-31	2.19817e-29
ENSG00000164733	6254.97	0.649336	0.0563608	11.5211	1.03323e-30	2.33084e-29
ENSG00000198589	5198.83	-0.677263	0.0587853	-11.521	1.03443e-30	2.33168e-29
ENSG00000073417	827.79	-0.833134	0.0723182	-11.5204	1.04124e-30	2.34516e-29
ENSG00000178623	122.528	1.78665	0.155128	11.5173	1.08001e-30	2.43054e-29
ENSG00000172197	666.931	0.954685	0.082901	11.516	1.09635e-30	2.46534e-29
ENSG00000144824	227.632	-1.25589	0.109099	-11.5115	1.15503e-30	2.59522e-29
ENSG00000117114	55.2287	-3.56009	0.309324	-11.5092	1.18515e-30	2.66079e-29
ENSG00000234488	437.671	11.7639	1.02316	11.4976	1.35681e-30	3.04376e-29
ENSG00000187474	55.4355	-4.13541	0.359689	-11.4972	1.36314e-30	3.05554e-29
ENSG00000110330	2461.35	-0.994144	0.0864913	-11.4942	1.4115e-30	3.16143e-29
ENSG00000100335	2214	0.620223	0.0539994	11.4857	1.55602e-30	3.48234e-29
ENSG00000153201	3811.64	-0.823787	0.0717455	-11.4821	1.62366e-30	3.63086e-29
ENSG00000117500	1427.18	-1.35401	0.117947	-11.4798	1.6663e-30	3.72326e-29
ENSG00000148840	4494.86	0.660432	0.0575464	11.4765	1.7311e-30	3.86499e-29
ENSG00000125652	778.405	1.19259	0.103927	11.4752	1.7567e-30	3.91903e-29
ENSG00000139618	636.612	-1.1145	0.0971301	-11.4743	1.77642e-30	3.9599e-29
ENSG00000112624	1077.29	-0.76679	0.0668345	-11.473	1.80367e-30	4.01746e-29
ENSG00000257167	513.327	-1.32253	0.115314	-11.469	1.88888e-30	4.20396e-29
ENSG00000130159	889.024	1.00362	0.0875082	11.4688	1.89222e-30	4.20807e-29
ENSG00000168280	131.162	-2.11198	0.18432	-11.4582	2.13965e-30	4.75456e-29
ENSG00000196126	203.475	1.26291	0.110259	11.454	2.24617e-30	4.98735e-29
ENSG00000198131	1473.45	0.762087	0.0665581	11.45	2.35278e-30	5.21995e-29
ENSG00000128699	1314.36	-0.974768	0.0851444	-11.4484	2.39471e-30	5.3088e-29
ENSG00000138036	518.478	-0.933913	0.0815996	-11.4451	2.48894e-30	5.51338e-29
ENSG00000085733	10083.9	-0.583827	0.0510387	-11.4389	2.67225e-30	5.91479e-29
ENSG00000106077	3097.75	-0.626842	0.0548009	-11.4385	2.68355e-30	5.93515e-29
ENSG00000123080	831.843	-0.927117	0.0810657	-11.4366	2.74398e-30	6.06405e-29
ENSG00000101911	1498.58	-0.723902	0.0633201	-11.4324	2.87949e-30	6.35855e-29
ENSG00000120742	5303.08	-0.804289	0.0703698	-11.4295	2.97919e-30	6.57355e-29
ENSG00000119396	5069.12	-0.62903	0.0550406	-11.4285	3.01369e-30	6.64449e-29
ENSG00000273066	301.481	1.21027	0.105909	11.4275	3.04683e-30	6.71229e-29
ENSG00000153250	720.807	-0.798053	0.0698698	-11.422	3.24681e-30	7.14729e-29
ENSG00000280075	210.962	1.47019	0.128723	11.4213	3.27193e-30	7.19698e-29
ENSG00000149091	5442.64	0.697941	0.0611597	11.4118	3.65187e-30	8.02642e-29
ENSG00000025039	383.442	1.23839	0.108554	11.408	3.81355e-30	8.37527e-29
ENSG00000134769	1024.78	-0.79723	0.0698884	-11.4072	3.84987e-30	8.44846e-29
ENSG00000168067	2506.53	0.701426	0.061497	11.4059	3.90936e-30	8.57233e-29
ENSG00000224914	239.629	-1.2021	0.105421	-11.4029	4.04507e-30	8.86304e-29
ENSG00000269313	250.916	1.3377	0.117323	11.4019	4.09103e-30	8.95679e-29
ENSG00000248854	94.5258	7.51535	0.659275	11.3994	4.20926e-30	9.20849e-29
ENSG00000163050	1240.19	0.780186	0.0684515	11.3976	4.29595e-30	9.39086e-29
ENSG00000198663	6337.99	-0.516831	0.0453573	-11.3947	4.44539e-30	9.71001e-29
ENSG00000125676	2242.05	-0.754502	0.0662568	-11.3875	4.82393e-30	1.05287e-28
ENSG00000152291	5895.37	-0.540063	0.0474383	-11.3845	4.99263e-30	1.08885e-28
ENSG00000065308	3634.33	-0.707359	0.062136	-11.384	5.02144e-30	1.09429e-28
ENSG00000215252	1509.5	-1.33814	0.117774	-11.3619	6.47341e-30	1.40961e-28
ENSG00000143434	636.178	1.23648	0.108901	11.3542	7.06992e-30	1.53832e-28
ENSG00000206561	117.732	-1.80864	0.159378	-11.3482	7.57238e-30	1.64638e-28
ENSG00000182310	437.483	-0.9055	0.0798544	-11.3394	8.37179e-30	1.81879e-28
ENSG00000111641	1015.37	0.729656	0.0643553	11.3379	8.51353e-30	1.84816e-28
ENSG00000164211	594.882	-2.05358	0.181179	-11.3345	8.85473e-30	1.92075e-28
ENSG00000172878	482.987	-0.897984	0.0793055	-11.3231	1.00853e-29	2.186e-28
ENSG00000169057	2483.14	0.531312	0.0469527	11.3159	1.09487e-29	2.37091e-28
ENSG00000257288	79.3572	-2.34335	0.207086	-11.3158	1.09552e-29	2.37091e-28
ENSG00000165689	2832.92	0.64766	0.0572488	11.3131	1.13064e-29	2.44505e-28
ENSG00000181444	1490.31	0.782932	0.0692073	11.3128	1.13355e-29	2.44945e-28
ENSG00000100918	202.243	1.60196	0.141608	11.3126	1.13678e-29	2.45456e-28
ENSG00000139629	3039.14	0.658583	0.0582219	11.3116	1.14967e-29	2.48048e-28
ENSG00000134243	6789.42	-0.852527	0.0754009	-11.3066	1.21737e-29	2.62455e-28
ENSG00000126457	3584.07	0.67263	0.0595025	11.3042	1.25051e-29	2.69395e-28
ENSG00000111897	3499.34	-0.693302	0.0613479	-11.3012	1.29508e-29	2.78782e-28
ENSG00000071282	1886.98	-0.653165	0.0577976	-11.3009	1.29875e-29	2.79361e-28
ENSG00000127980	811.372	-0.837455	0.0741155	-11.2993	1.32232e-29	2.84214e-28
ENSG00000101098	598.484	1.02617	0.0908358	11.297	1.35842e-29	2.9175e-28
ENSG00000069702	99.5973	-1.99838	0.177016	-11.2893	1.48273e-29	3.18205e-28
ENSG00000117115	768.046	0.798405	0.0707602	11.2832	1.5878e-29	3.40497e-28
ENSG00000102189	2503.94	-0.916442	0.0812283	-11.2823	1.60498e-29	3.43919e-28
[truncated: 26,904 more rows]

## Sheet: T72vT0, A3B-Mut, rRNA depletion
ensembl_gene_id	baseMean	log2FoldChange	lfcSE	stat	pvalue	padj
[truncated: 28,215 more rows]
